# Supplementary material for: CKS2 and RMI2 are two prognostic biomarkers of lung adenocarcinoma
Source: PeerJ. 2020 Oct 7;8:e10126. doi: 10.7717/peerj.10126 (PMC7547618; doi:10.7717/peerj.10126)
Supplement: Supplemental Information 3 [file peerj-08-10126-s003.xlsx]

## Sheet: GSE32863
ID	adj.P.Val	P.Value	t	B	logFC	Gene.symbol	Gene.title
ILMN_1786396	0.416	0.00659	-2.81973	-2.41176	-0.289	ZZEF1	zinc finger ZZ-type and EF-hand domain containing 1
ILMN_2362549	0.3161	0.00127	3.3895	-1.00113	0.469	ZWINT	ZW10 interacting kinetochore protein
ILMN_2362545	0.418	0.00689	2.80352	-2.4492	0.169	ZWINT	ZW10 interacting kinetochore protein
ILMN_1773868	0.3454	0.00245	-3.16953	-1.56669	-0.634	ZRSR2	zinc finger CCCH-type, RNA binding motif and serine/arginine rich 2
ILMN_2398587	0.4442	0.00945	2.68587	-2.71604	0.3	ZNRD1	zinc ribbon domain containing 1
ILMN_1727938	0.44	0.0089	2.70849	-2.6654	0.112	ZNF764	zinc finger protein 764
ILMN_1656192	0.3525	0.00262	3.14641	-1.62468	0.0989	ZNF704	zinc finger protein 704
ILMN_1713454	0.3541	0.00277	-3.12769	-1.67141	-0.379	ZNF671	zinc finger protein 671
ILMN_1785926	0.3585	0.00324	-3.07348	-1.80565	-0.362	ZNF621	zinc finger protein 621
ILMN_2075820	0.2932	0.000655	3.60496	-0.42396	0.206	ZNF598	zinc finger protein 598
ILMN_1653310	0.3937	0.00456	-2.95251	-2.09926	-0.0826	ZNF580	zinc finger protein 580
ILMN_1677785	0.4455	0.00957	-2.68114	-2.72659	-0.281	ZNF559	zinc finger protein 559
ILMN_1681846	0.4185	0.0069	-2.80262	-2.45128	-0.201	ZNF540	zinc finger protein 540
ILMN_1774757	0.4401	0.00901	2.7037	-2.67616	0.0569	ZNF496	zinc finger protein 496
ILMN_1656504	0.2698	0.000586	-3.64036	-0.32707	-0.144	ZNF304	zinc finger protein 304
ILMN_1663858	0.437	0.00827	2.73579	-2.60385	0.128	ZNF286A	zinc finger protein 286A
ILMN_1802094	0.3959	0.00478	2.9356	-2.13962	0.0946	ZNF280A	zinc finger protein 280A
ILMN_1787539	0.3692	0.0037	-3.02623	-1.92131	-0.245	ZNF177	zinc finger protein 177
ILMN_1695079	0.4401	0.00903	-2.70295	-2.67784	-0.167	ZNF101	zinc finger protein 101
ILMN_1720829	0.4246	0.00759	-2.76761	-2.53154	-0.636	ZFP36	ZFP36 ring finger protein
ILMN_1720053	0.4311	0.00795	2.75037	-2.57081	0.323	ZFAND3	zinc finger AN1-type containing 3
ILMN_1730907	0.3937	0.00458	2.95112	-2.10257	0.399	ZFAND1	zinc finger AN1-type containing 1
ILMN_1668270	0.4101	0.00623	2.84024	-2.36418	0.309	ZDHHC18	zinc finger DHHC-type containing 18
ILMN_1703370	0.3161	0.00117	3.41792	-0.92629	0.486	ZDHHC12	zinc finger DHHC-type containing 12
ILMN_1667068	0.4329	0.00804	-2.74617	-2.58034	-0.27	ZC3HAV1	zinc finger CCCH-type containing, antiviral 1
ILMN_1796737	0.437	0.0083	-2.73452	-2.60675	-0.398	ZBTB7C	zinc finger and BTB domain containing 7C
ILMN_2093500	0.3937	0.00457	-2.95181	-2.10093	-0.431	ZBED5	zinc finger BED-type containing 5
ILMN_1812580	0.3091	0.001	3.46825	-0.79273	0.437	YDJC	YdjC homolog (bacterial)
ILMN_1696266	0.3525	0.00257	3.15275	-1.60881	0.306	XRCC3	X-ray repair cross complementing 3
ILMN_1743711	0.3432	0.00231	3.18913	-1.51733	0.599	XPOT	exportin for tRNA
ILMN_2188374	0.4453	0.00955	2.68162	-2.72551	0.193	XPOT	exportin for tRNA
ILMN_1787591	0.4436	0.00936	-2.68932	-2.70834	-0.105	XPA	XPA, DNA damage recognition and repair factor
ILMN_1711166	0.3525	0.00259	3.15104	-1.61308	0.29	WRAP73	WD repeat containing, antisense to TP73
ILMN_1766729	0.3959	0.00484	2.93114	-2.15026	0.0697	WNT9A	Wnt family member 9A
ILMN_2279873	0.2698	0.000555	-3.65769	-0.27945	-0.196	WHAMM	WAS protein homolog associated with actin, golgi membranes and microtubules
ILMN_1742618	0.4858	0.0138	-2.54054	-3.03359	-0.713	XAF1	XIAP associated factor 1
ILMN_1666632	0.4408	0.00906	2.7016	-2.68085	0.269	VPS52	VPS52, GARP complex subunit
ILMN_1692754	0.3432	0.00209	-3.22447	-1.42781	-0.421	VMP1	vacuole membrane protein 1
ILMN_1735910	0.4081	0.00605	-2.85062	-2.33999	-0.4	VMO1	vitelline membrane outer layer 1 homolog
ILMN_1693060	0.4246	0.00744	2.77478	-2.51516	0.0563	VEGFA	vascular endothelial growth factor A
ILMN_1700690	0.408	0.00603	-2.852	-2.33679	-0.396	VAT1	vesicle amine transport 1
ILMN_1755507	0.3432	0.00229	-3.1926	-1.50858	-0.0619	VARS	valyl-tRNA synthetase
ILMN_1729319	0.4449	0.00951	-2.68332	-2.72173	-0.285	USP7	ubiquitin specific peptidase 7
ILMN_1671494	0.2537	0.000195	3.98232	0.63641	0.484	USP5	ubiquitin specific peptidase 5
ILMN_2115696	0.3982	0.00531	2.89793	-2.22898	0.281	USP42	ubiquitin specific peptidase 42
ILMN_1721116	0.4166	0.00676	2.81058	-2.43293	0.318	USP10	ubiquitin specific peptidase 10
ILMN_1790461	0.4145	0.00647	2.82627	-2.39663	0.449	UQCC2	ubiquinol-cytochrome c reductase complex assembly factor 2
ILMN_1752755	0.3366	0.0015	-3.33549	-1.14228	-0.642	VWF	von Willebrand factor
ILMN_2399463	0.547	0.0254	2.29482	-3.53859	0.653	VAV3	vav guanine nucleotide exchange factor 3
ILMN_1669747	0.3161	0.00129	-3.38532	-1.0121	-0.572	UNC13B	unc-13 homolog B
ILMN_2292334	0.4389	0.00848	2.72634	-2.62521	0.0519	UBTF	upstream binding transcription factor, RNA polymerase I
ILMN_1741253	0.3161	0.00118	3.41378	-0.9372	0.353	UBR5	ubiquitin protein ligase E3 component n-recognin 5
ILMN_1786065	0.3161	0.00128	3.38796	-1.00518	0.729	UHRF1	ubiquitin like with PHD and ring finger domains 1
ILMN_1736939	0.383	0.00426	-2.97667	-2.04127	-0.641	UGCG	UDP-glucose ceramide glucosyltransferase
ILMN_1782954	0.3566	0.00291	3.11031	-1.71462	0.418	UBE2K	ubiquitin conjugating enzyme E2 K
ILMN_1711470	0.3366	0.00154	3.32566	-1.16782	0.64	UBE2T	ubiquitin conjugating enzyme E2 T
ILMN_2265654	0.4295	0.00786	2.75481	-2.56071	0.226	UBE2C	ubiquitin conjugating enzyme E2 C
ILMN_1808591	0.3432	0.00241	3.17479	-1.55347	0.768	UBE2S	ubiquitin conjugating enzyme E2 S
ILMN_2301083	0.3575	0.00321	3.07671	-1.79768	1.14	UBE2C	ubiquitin conjugating enzyme E2 C
ILMN_1738369	0.3161	0.00112	3.43024	-0.89371	0.359	TUFM	Tu translation elongation factor, mitochondrial
ILMN_2215640	0.383	0.00429	2.97431	-2.04695	0.413	TUBA3D	tubulin alpha 3d
ILMN_1758497	0.3973	0.00499	2.92046	-2.17563	0.161	TTYH1	tweety family member 1
ILMN_1788166	0.3692	0.00367	3.02989	-1.91238	0.415	TTK	TTK protein kinase
ILMN_1718621	0.3959	0.00479	-2.93508	-2.14087	-0.393	TSPAN32	tetraspanin 32
ILMN_1657194	0.3161	0.00115	-3.42255	-0.91403	-0.14	TSNAXIP1	translin associated factor X interacting protein 1
ILMN_1868751	0.4218	0.00701	2.79722	-2.46371	0.0925	TSL	testis-expressed, seven-twelve, leukemia
ILMN_1711091	0.2698	0.000552	3.6591	-0.27555	0.182	TSC22D1	TSC22 domain family member 1
ILMN_2116075	0.3823	0.00412	2.98913	-2.01124	0.242	TRUB2	TruB pseudouridine synthase family member 2
ILMN_1700337	0.3703	0.00377	3.02023	-1.93591	0.448	TROAP	trophinin associated protein
ILMN_2172547	0.3366	0.00155	-3.32452	-1.17077	-0.114	TRIM74	tripartite motif containing 74
ILMN_2404665	0.3366	0.00149	-3.33701	-1.13835	-0.229	TRIM5	tripartite motif containing 5
ILMN_1736575	0.3828	0.00419	2.98288	-2.02632	0.391	TRIM28	tripartite motif containing 28
ILMN_1699737	0.3161	0.00115	3.42388	-0.91052	0.321	TRAP1	TNF receptor associated protein 1
ILMN_2405991	0.3566	0.003	3.10034	-1.73933	0.365	TRAF7	TNF receptor associated factor 7
ILMN_1794612	0.3413	0.00162	-3.31033	-1.20754	-0.699	UBA7	ubiquitin like modifier activating enzyme 7
ILMN_2181191	0.3432	0.00222	3.20362	-1.4807	0.424	TPI1	triosephosphate isomerase 1
ILMN_1778977	0.5412	0.0248	-2.30534	-3.51781	-0.609	TYROBP	TYRO protein tyrosine kinase binding protein
ILMN_1746426	0.408	0.00602	2.85276	-2.335	0.313	TOMM70	translocase of outer mitochondrial membrane 70
ILMN_2082314	0.4056	0.00568	-2.87396	-2.2854	-0.446	TOM1	target of myb1 membrane trafficking protein
ILMN_1764788	0.3432	0.00206	-3.22922	-1.41573	-0.428	TNFRSF1B	TNF receptor superfamily member 1B
ILMN_1697448	0.437	0.0083	-2.73432	-2.6072	-0.586	TXNIP	thioredoxin interacting protein
ILMN_1665583	0.5288	0.022	2.35472	-3.41929	0.528	TUBB	tubulin beta class I
ILMN_1688848	0.4392	0.00853	-2.72428	-2.62987	-0.381	TMEM44	transmembrane protein 44
ILMN_1678004	0.383	0.00438	-2.96667	-2.06531	-0.384	TMEM41B	transmembrane protein 41B
ILMN_2212714	0.3541	0.00274	3.13093	-1.66334	0.251	TMEM39B	transmembrane protein 39B
ILMN_1700419	0.3648	0.0034	3.05619	-1.84811	0.432	TMEM208	transmembrane protein 208
ILMN_2145518	0.4401	0.009	-2.70399	-2.67549	-0.469	TMEM126B	transmembrane protein 126B
ILMN_2108493	0.3421	0.00169	3.29529	-1.24641	0.109	TMEM120B	transmembrane protein 120B
ILMN_2414762	0.3566	0.00316	-3.08148	-1.78594	-0.202	TLR10	toll like receptor 10
ILMN_1696704	0.3421	0.00163	-3.30634	-1.21786	-0.152	TLE4	transducin like enhancer of split 4
ILMN_1678619	0.4101	0.00619	2.84232	-2.35933	0.251	TKFC	triokinase and FMN cyclase
ILMN_1679401	0.547	0.0255	-2.29417	-3.53986	-0.501	TRPM4	transient receptor potential cation channel subfamily M member 4
ILMN_1674662	0.2698	0.00042	3.74512	-0.03709	0.206	TICRR	TOPBP1 interacting checkpoint and replication regulator
ILMN_1796855	0.3161	0.00114	3.42439	-0.90916	0.412	TIAL1	TIA1 cytotoxic granule-associated RNA binding protein-like 1
ILMN_1717745	0.3161	0.00126	3.39367	-0.99019	0.34	TIAL1	TIA1 cytotoxic granule-associated RNA binding protein-like 1
ILMN_1771600	0.4295	0.00781	2.75718	-2.55532	0.0897	THAP7	THAP domain containing 7
ILMN_1796589	0.5726	0.0301	2.22385	-3.67667	0.56	TRIP13	thyroid hormone receptor interactor 13
ILMN_1796949	0.2998	0.000748	3.56237	-0.53977	0.659	TPX2	TPX2, microtubule nucleation factor
ILMN_1653529	0.3939	0.0046	2.94932	-2.10688	0.303	TEX10	testis expressed 10
ILMN_1694847	0.3566	0.00298	3.10219	-1.73476	0.495	TERF1	telomeric repeat binding factor 1
ILMN_1654570	0.3982	0.00525	-2.90231	-2.21863	-0.406	TEKT1	tektin 1
ILMN_1706511	0.3432	0.00232	-3.18881	-1.51813	-0.401	TEF	TEF, PAR bZIP transcription factor
ILMN_2413041	0.2698	0.00047	3.70977	-0.13549	0.152	TEAD4	TEA domain transcription factor 4
ILMN_2391789	0.437	0.00832	2.73364	-2.60873	0.106	TDP1	tyrosyl-DNA phosphodiesterase 1
ILMN_1707005	0.3982	0.00521	2.90513	-2.21196	0.0725	TCF7	transcription factor 7 (T-cell specific, HMG-box)
ILMN_2414848	0.2698	0.000264	3.88942	0.36993	0.476	TBRG4	transforming growth factor beta regulator 4
ILMN_1797744	0.463	0.0111	-2.62443	-2.85195	-0.725	TPPP3	tubulin polymerization promoting protein family member 3
ILMN_2390227	0.4394	0.00856	-2.72278	-2.63325	-0.352	TBC1D9B	TBC1 domain family member 9B
ILMN_1710434	0.44	0.00889	-2.70852	-2.66533	-0.466	TBC1D10C	TBC1 domain family member 10C
ILMN_1724407	0.3816	0.00408	2.99205	-2.00419	0.415	TACC3	transforming acidic coiled-coil containing protein 3
ILMN_1803745	0.44	0.00862	-2.72044	-2.63852	-0.336	SUOX	sulfite oxidase
ILMN_1673793	0.437	0.00826	2.73636	-2.60258	0.136	SUN3	Sad1 and UNC84 domain containing 3
ILMN_1707627	0.408	0.00602	2.85289	-2.33469	0.507	TPI1	triosephosphate isomerase 1
ILMN_1699265	0.3631	0.00334	-3.06271	-1.83211	-0.559	TNFRSF10B	TNF receptor superfamily member 10b
ILMN_1711383	0.3432	0.00234	-3.18568	-1.52603	-0.354	STK4	serine/threonine kinase 4
ILMN_1778213	0.4519	0.01	-2.66416	-2.76433	-0.178	STK33	serine/threonine kinase 33
ILMN_1791123	0.3432	0.00238	-3.17924	-1.54226	-0.846	TMPRSS2	transmembrane protease, serine 2
ILMN_1755234	0.4392	0.00852	-2.72451	-2.62934	-0.41	SSH3	slingshot protein phosphatase 3
ILMN_1697469	0.4166	0.00672	-2.8124	-2.42871	-0.34	SRSF6	serine and arginine rich splicing factor 6
ILMN_1792455	0.6252	0.0497	2.0051	-4.07931	0.554	TMEM158	transmembrane protein 158 (gene/pseudogene)
ILMN_2378868	0.4119	0.00632	-2.83501	-2.37634	-0.48	SRSF5	serine and arginine rich splicing factor 5
ILMN_1811820	0.4426	0.00929	2.69232	-2.70163	0.145	SRRM4	serine/arginine repetitive matrix 4
ILMN_1661337	0.3432	0.00217	3.21111	-1.46173	0.4	SRM	spermidine synthase
ILMN_1699525	0.4392	0.0085	-2.72557	-2.62696	-0.398	SRI	sorcin
ILMN_2400219	0.4417	0.0092	-2.69591	-2.69361	-0.448	SRI	sorcin
ILMN_1772241	0.3959	0.00481	2.93398	-2.1435	0.431	SQLE	squalene epoxidase
ILMN_1695357	0.4498	0.00991	2.66785	-2.75614	0.248	SPDL1	spindle apparatus coiled-coil protein 1
ILMN_2149400	0.3973	0.00499	2.92069	-2.1751	0.0849	SPC25	SPC25, NDC80 kinetochore complex component
ILMN_1687247	0.44	0.00877	-2.71374	-2.6536	-0.42	SPATA20	spermatogenesis associated 20
ILMN_1834497	0.2998	0.000741	3.56554	-0.5312	0.0802	SPATA17	spermatogenesis associated 17
ILMN_1769721	0.3432	0.00219	3.20731	-1.47136	0.145	SP6	Sp6 transcription factor
ILMN_2246882	0.3939	0.00462	-2.94813	-2.10974	-0.329	SP140	SP140 nuclear body protein
ILMN_1798615	0.4246	0.00737	2.77829	-2.50714	0.333	SOHLH2	spermatogenesis and oogenesis specific basic helix-loop-helix 2
ILMN_1697614	0.409	0.00609	2.84858	-2.34477	0.375	SNU13	SNU13 homolog, small nuclear ribonucleoprotein (U4/U6.U5)
ILMN_1715179	0.2698	0.000255	3.90007	0.40031	0.352	SNRPA1	small nuclear ribonucleoprotein polypeptide A'
ILMN_2107184	0.3432	0.0023	-3.19097	-1.51269	-0.376	SNRK	SNF related kinase
ILMN_2082762	0.3432	0.0021	3.22204	-1.43398	0.442	SNORD68	small nucleolar RNA, C/D box 68
ILMN_2209515	0.44	0.00875	2.71474	-2.65136	0.209	SNORD56	small nucleolar RNA, C/D box 56
ILMN_1680393	0.4246	0.00752	2.77092	-2.524	0.301	SNORD55	small nucleolar RNA, C/D box 55
ILMN_2157020	0.4475	0.00975	2.67393	-2.74264	0.186	SNORD48	small nucleolar RNA, C/D box 48
ILMN_1682402	0.383	0.00439	2.96648	-2.06578	0.382	SNORD46	small nucleolar RNA, C/D box 46
ILMN_1739086	0.3421	0.00173	3.2882	-1.26468	0.17	SNORD43	small nucleolar RNA, C/D box 43
ILMN_1684278	0.3566	0.003	3.09996	-1.74026	0.178	SNORD38A	small nucleolar RNA, C/D box 38A
ILMN_1666599	0.4246	0.00753	2.77044	-2.52509	0.122	SNORD30	small nucleolar RNA, C/D box 30
ILMN_1784328	0.4339	0.0081	2.74353	-2.58632	0.14	SNORD25	small nucleolar RNA, C/D box 25
ILMN_1787326	0.3432	0.00232	3.18791	-1.52042	0.178	SNORA65	small nucleolar RNA, H/ACA box 65
ILMN_1757370	0.3007	0.000886	-3.5077	-0.68723	-0.278	SMPD1	sphingomyelin phosphodiesterase 1
ILMN_1694759	0.4166	0.00666	-2.81597	-2.42046	-0.277	SMIM7	small integral membrane protein 7
ILMN_2296422	0.366	0.00349	3.04721	-1.8701	0.0611	SMC2	structural maintenance of chromosomes 2
ILMN_1748923	0.4401	0.00902	2.70332	-2.67701	0.141	SMC2	structural maintenance of chromosomes 2
ILMN_1685709	0.4629	0.0109	-2.63004	-2.83963	-0.621	TMEM125	transmembrane protein 125
ILMN_2403458	0.44	0.00866	2.7186	-2.64267	0.384	SMARCB1	SWI/SNF related, matrix associated, actin dependent regulator of chromatin, subfamily b, member 1
ILMN_1777637	0.3413	0.00159	-3.31479	-1.196	-0.286	SLFNL1	schlafen like 1
ILMN_2401457	0.3566	0.00303	3.0962	-1.74958	0.0662	SLC7A3	solute carrier family 7 member 3
ILMN_1806037	0.3161	0.00122	3.40397	-0.96306	0.808	TK1	thymidine kinase 1
ILMN_1707124	0.4246	0.00731	-2.78165	-2.49945	-0.942	TFPI	tissue factor pathway inhibitor
ILMN_1854570	0.3007	0.000883	3.50886	-0.6841	0.105	SLC24A2	solute carrier family 24 member 2
ILMN_2115777	0.4062	0.00579	-2.86673	-2.30234	-0.0666	SLC16A11	solute carrier family 16 member 11
ILMN_1736816	0.3566	0.00287	3.11557	-1.70155	0.169	SKA3	spindle and kinetochore associated complex subunit 3
ILMN_1652693	0.4475	0.00974	2.67417	-2.74211	0.0681	SHH	sonic hedgehog
ILMN_1814790	0.3692	0.00361	-3.03561	-1.89844	-0.371	SHANK2	SH3 and multiple ankyrin repeat domains 2
ILMN_2404906	0.3161	0.00118	3.41421	-0.93606	0.158	SGO1	shugoshin 1
ILMN_1730825	0.416	0.00656	2.82142	-2.40785	0.143	SGO1	shugoshin 1
ILMN_2363361	0.3366	0.00154	3.3256	-1.16799	0.47	SFXN4	sideroflexin 4
ILMN_1662619	0.4498	0.00989	-2.66855	-2.75459	-0.922	TFPI	tissue factor pathway inhibitor
ILMN_1689389	0.396	0.00488	2.92849	-2.15655	0.38	SF3B5	splicing factor 3b subunit 5
ILMN_1731644	0.3939	0.00461	-2.94889	-2.10792	-0.338	SETDB2	SET domain bifurcated 2
ILMN_1712400	0.4475	0.00976	-2.67338	-2.74385	-0.373	SERPINB6	serpin family B member 6
ILMN_1760049	0.3703	0.00378	-3.01882	-1.93933	-0.358	SERGEF	secretion regulating guanine nucleotide exchange factor
ILMN_1833458	0.325	0.00135	-3.36952	-1.05353	-0.0757	SEPT7-AS1	SEPT7 antisense RNA 1 (head to head)
ILMN_1715417	0.4246	0.00741	-2.77652	-2.51118	-0.144	SELP	selectin P
ILMN_1726928	0.5769	0.0319	-2.19949	-3.72324	-0.508	TCEA3	transcription elongation factor A3
ILMN_1763989	0.44	0.00875	-2.71463	-2.6516	-0.209	SEC63	SEC63 homolog, protein translocation regulator
ILMN_1752435	0.3432	0.00229	3.19232	-1.50928	0.204	SEC22C	SEC22 homolog C, vesicle trafficking protein
ILMN_1783728	0.2698	0.000295	3.85482	0.27156	0.519	TBRG4	transforming growth factor beta regulator 4
ILMN_1766657	0.2998	0.000762	-3.55633	-0.55612	-0.641	STOM	stomatin
ILMN_2324029	0.4067	0.00593	2.85799	-2.32279	0.147	SCRIB	scribbled planar cell polarity protein
ILMN_1696243	0.4612	0.0108	-2.63445	-2.82995	-0.513	STMND1	stathmin domain containing 1
ILMN_1794230	0.4417	0.00919	2.69609	-2.69321	0.327	SCAND1	SCAN domain containing 1
ILMN_1657796	0.3566	0.00294	3.1069	-1.72307	0.645	STMN1	stathmin 1
ILMN_1658821	0.3366	0.00156	3.32231	-1.17653	0.378	SAMD1	sterile alpha motif domain containing 1
ILMN_1713636	0.3939	0.00466	-2.94523	-2.11666	-0.49	S100A6	S100 calcium binding protein A6
ILMN_1656540	0.3366	0.00151	3.33298	-1.14881	0.435	RUVBL1	RuvB like AAA ATPase 1
ILMN_1693108	0.4131	0.00638	2.83159	-2.38427	0.458	RUVBL1	RuvB like AAA ATPase 1
ILMN_1710522	0.437	0.00824	2.7373	-2.60045	0.0872	RUNX1T1	RUNX1 translocation partner 1
ILMN_1689212	0.3161	0.00123	-3.40003	-0.97343	-0.399	RSPH4A	radial spoke head 4 homolog A
ILMN_2068698	0.3828	0.00418	-2.98325	-2.02542	-0.183	RSPH4A	radial spoke head 4 homolog A
ILMN_1767253	0.3161	0.00128	3.38659	-1.00877	0.444	RRP12	ribosomal RNA processing 12 homolog
ILMN_1910120	0.437	0.00829	-2.73477	-2.60618	-0.257	RRN3P1	RRN3 homolog, RNA polymerase I transcription factor pseudogene 1
ILMN_2413650	0.3366	0.00151	3.33179	-1.15192	0.509	STIL	SCL/TAL1 interrupting locus
ILMN_1652736	0.4295	0.00786	-2.75478	-2.56078	-0.157	RPS6KA3	ribosomal protein S6 kinase A3
ILMN_1656625	0.4246	0.00742	-2.77615	-2.51205	-0.352	RPS24	ribosomal protein S24
ILMN_1761996	0.3703	0.00384	-3.01356	-1.95212	-0.511	SRSF5	serine and arginine rich splicing factor 5
ILMN_1749234	0.3631	0.00333	-3.06375	-1.82956	-0.166	RPL13AP17	ribosomal protein L13a pseudogene 17
ILMN_2169152	0.5009	0.0161	-2.47936	-3.16314	-0.549	SRGN	serglycin
ILMN_1677432	0.5645	0.0282	2.25206	-3.62221	0.577	SRGAP1	SLIT-ROBO Rho GTPase activating protein 1
ILMN_1797926	0.4052	0.00566	-2.87489	-2.28322	-0.111	ROBO2	roundabout guidance receptor 2
ILMN_1710723	0.44	0.00889	2.70851	-2.66536	0.0527	ROBO1	roundabout guidance receptor 1
ILMN_1691843	0.4513	0.00996	2.66588	-2.76051	0.266	RNPS1	RNA binding protein with serine rich domain 1
ILMN_2295346	0.4166	0.00671	2.81302	-2.42727	0.0589	RNLS	renalase, FAD dependent amine oxidase
ILMN_1677113	0.4015	0.00556	2.88146	-2.26778	0.219	RNF8	ring finger protein 8
ILMN_1762787	0.4417	0.00922	2.69489	-2.69589	0.331	RNF26	ring finger protein 26
ILMN_1798205	0.4376	0.00844	-2.72824	-2.62093	-0.0561	RNF222	ring finger protein 222
ILMN_2041293	0.4858	0.0145	2.52198	-3.07314	0.505	SQLE	squalene epoxidase
ILMN_1746013	0.4734	0.0121	2.59122	-2.92439	0.652	SPOCK1	sparc/osteonectin, cwcv and kazal-like domains proteoglycan (testican) 1
ILMN_1783469	0.3566	0.00308	3.091	-1.76242	0.421	RMDN1	regulator of microtubule dynamics 1
ILMN_1763763	0.409	0.00608	-2.84894	-2.34392	-0.287	RIPK3	receptor interacting serine/threonine kinase 3
ILMN_1757425	0.44	0.0088	-2.71272	-2.65589	-0.0698	RIMBP3	RIMS binding protein 3
ILMN_1787266	0.5831	0.0339	-2.17392	-3.77165	-1.46	SPINK1	serine peptidase inhibitor, Kazal type 1
ILMN_1727770	0.4246	0.00724	-2.78505	-2.49165	-0.0554	RGN	regucalcin
ILMN_2372698	0.4449	0.00953	-2.6827	-2.7231	-0.342	RGN	regucalcin
ILMN_1709809	0.4891	0.0151	2.50654	-3.1059	0.509	SNU13	SNU13 homolog, small nuclear ribonucleoprotein (U4/U6.U5)
ILMN_1784860	0.437	0.00835	2.73239	-2.61156	0.26	RFC3	replication factor C subunit 3
ILMN_1729611	0.3526	0.00269	3.13778	-1.64624	0.246	REEP4	receptor accessory protein 4
ILMN_1881909	0.5833	0.034	2.17236	-3.77459	1.24	SNAR-A1	small ILF3/NF90-associated RNA A1
ILMN_1708537	0.3982	0.00541	2.89139	-2.2444	0.471	RBPJ	recombination signal binding protein for immunoglobulin kappa J region
ILMN_1806403	0.3703	0.00377	-3.02044	-1.93539	-0.471	RASL12	RAS like family 12
ILMN_1727045	0.3454	0.00246	-3.16875	-1.56867	-0.332	RASGRP3	RAS guanyl releasing protein 3
ILMN_2309180	0.4246	0.00722	-2.78586	-2.48979	-0.523	SMARCD3	SWI/SNF related, matrix associated, actin dependent regulator of chromatin, subfamily d, member 3
ILMN_1761782	0.383	0.00432	-2.97234	-2.0517	-0.326	RAMP3	receptor (G protein-coupled) activity modifying protein 3
ILMN_1699856	0.4414	0.00913	-2.69886	-2.687	-0.47	RALGDS	ral guanine nucleotide dissociation stimulator
ILMN_1722127	0.3566	0.00291	3.1101	-1.71513	0.174	RAD54B	RAD54 homolog B (S. cerevisiae)
ILMN_1760635	0.3006	0.000809	3.53724	-0.60772	0.317	RAD51C	RAD51 paralog C
ILMN_1670353	0.4062	0.00588	2.86143	-2.31474	0.437	RAD51AP1	RAD51 associated protein 1
ILMN_2257432	0.3566	0.00313	3.08524	-1.77665	0.0824	RAD51	RAD51 recombinase
ILMN_2087656	0.5182	0.0202	-2.38869	-3.35052	-0.515	SLCO2B1	solute carrier organic anion transporter family member 2B1
ILMN_2077550	0.3432	0.00241	3.17536	-1.55204	0.48	RACGAP1	Rac GTPase activating protein 1
ILMN_1730977	0.5365	0.0238	-2.32175	-3.48527	-0.624	SLC44A4	solute carrier family 44 member 4
ILMN_2255579	0.3982	0.00509	-2.91306	-2.19319	-0.498	RAB37	RAB37, member RAS oncogene family
ILMN_2184109	0.3432	0.00225	-3.19903	-1.49232	-1.18	SLC34A2	solute carrier family 34 member 2
ILMN_1788180	0.416	0.00659	-2.81975	-2.41172	-0.396	RAB13	RAB13, member RAS oncogene family
ILMN_1681467	0.3432	0.00232	-3.18882	-1.51812	-0.404	RAB11FIP4	RAB11 family interacting protein 4
ILMN_1719627	0.3421	0.00163	-3.30678	-1.21673	-0.685	SLC27A3	solute carrier family 27 member 3
ILMN_1686387	0.3432	0.00232	3.18776	-1.52078	0.208	PYCRL	pyrroline-5-carboxylate reductase-like
ILMN_2395092	0.2698	0.000563	3.65281	-0.29287	0.15	PYCR1	pyrroline-5-carboxylate reductase 1
ILMN_1681634	0.3432	0.00234	3.18583	-1.52567	0.391	PXMP2	peroxisomal membrane protein 2
ILMN_1799015	0.437	0.0084	2.72995	-2.61707	0.472	PXMP2	peroxisomal membrane protein 2
ILMN_1665538	0.4611	0.0108	2.63591	-2.82673	0.513	SKP2	S-phase kinase-associated protein 2, E3 ubiquitin protein ligase
ILMN_1657128	0.3566	0.0029	-3.11108	-1.7127	-0.297	PTPRU	protein tyrosine phosphatase, receptor type U
ILMN_1676305	0.309	0.000988	3.47256	-0.78123	0.134	PTK2	protein tyrosine kinase 2
ILMN_1795166	0.3585	0.00324	-3.07311	-1.80654	-0.431	PTH1R	parathyroid hormone 1 receptor
ILMN_2345016	0.3982	0.00528	2.90022	-2.22358	0.368	PTGES2	prostaglandin E synthase 2
ILMN_1795930	0.44	0.0089	-2.70831	-2.6658	-0.41	PTGER4	prostaglandin E receptor 4
ILMN_1758146	0.4858	0.0134	-2.55286	-3.00719	-0.519	SIRPA	signal regulatory protein alpha
ILMN_1671843	0.3432	0.00236	3.18211	-1.53505	0.351	PSRC1	proline and serine rich coiled-coil 1
ILMN_1789887	0.44	0.00874	-2.71512	-2.6505	-0.0608	PSPN	persephin
ILMN_1776105	0.44	0.00892	2.70761	-2.66737	0.417	PSPH	phosphoserine phosphatase
ILMN_1682098	0.4246	0.00757	2.7685	-2.52951	0.389	PSMA4	proteasome subunit alpha 4
ILMN_1806242	0.3566	0.00286	3.11578	-1.70103	0.101	PSD	pleckstrin and Sec7 domain containing
ILMN_1768575	0.4583	0.0106	-2.64164	-2.81413	-1.26	SFTPD	surfactant protein D
ILMN_2400360	0.3982	0.00522	2.90429	-2.21395	0.0569	PRSS54	protease, serine 54
ILMN_2408179	0.2698	0.000575	3.64654	-0.3101	0.488	PRRC2A	proline rich coiled-coil 2A
ILMN_1760563	0.4475	0.00972	2.6752	-2.73981	0.342	PRRC2A	proline rich coiled-coil 2A
ILMN_1677509	0.3566	0.00299	3.10155	-1.73634	0.336	PRR7	proline rich 7 (synaptic)
ILMN_1782403	0.2698	0.000413	3.75036	-0.02247	0.453	PRR11	proline rich 11
ILMN_1769545	0.408	0.00604	2.85173	-2.33742	0.301	PRPF19	pre-mRNA processing factor 19
ILMN_2206949	0.3053	0.000913	-3.49792	-0.71346	-2	SFTPC	surfactant protein C
ILMN_1674390	0.3432	0.00211	3.22116	-1.43621	0.335	PRKAR1B	protein kinase cAMP-dependent type I regulatory subunit beta
ILMN_2359835	0.5142	0.0189	-2.41598	-3.29471	-1.21	SFTPB	surfactant protein B
ILMN_1785071	0.5737	0.0303	-2.22118	-3.68178	-0.553	SEPP1	selenoprotein P, plasma, 1
ILMN_1711493	0.4401	0.00898	-2.70482	-2.67363	-0.241	PRAM1	PML-RARA regulated adaptor molecule 1
ILMN_2359887	0.3421	0.0017	3.29314	-1.25194	0.212	PPP2R5D	protein phosphatase 2 regulatory subunit B'delta
ILMN_1780940	0.3692	0.00362	3.03429	-1.90167	0.333	PPP2R5D	protein phosphatase 2 regulatory subunit B'delta
ILMN_1732141	0.3432	0.00207	3.2272	-1.42086	0.0588	PPP1R8	protein phosphatase 1 regulatory subunit 8
ILMN_1659936	0.3673	0.00353	-3.04293	-1.88056	-0.468	PPP1R15A	protein phosphatase 1 regulatory subunit 15A
ILMN_1680652	0.4629	0.011	-2.62791	-2.8443	-0.779	SELENBP1	selenium binding protein 1
ILMN_1864422	0.3827	0.00416	2.98552	-2.01995	0.2	POU2F1	POU class 2 homeobox 1
ILMN_1760667	0.4246	0.00752	-2.77089	-2.52406	-0.325	POLR3GL	RNA polymerase III subunit G like
ILMN_2197247	0.2698	0.000441	3.73033	-0.07832	0.459	POLR3A	RNA polymerase III subunit A
ILMN_1681837	0.3432	0.00206	3.22899	-1.4163	0.422	POLR3A	RNA polymerase III subunit A
ILMN_1746686	0.3432	0.00243	3.17295	-1.5581	0.293	POLR1C	RNA polymerase I subunit C
ILMN_1658221	0.3982	0.00532	2.89773	-2.22945	0.094	POLH	DNA polymerase eta
ILMN_1746252	0.2698	0.000374	3.78137	0.06434	0.486	POLD2	DAN polymerase delta 2, accessory subunit
ILMN_1725145	0.3421	0.00171	3.2918	-1.25541	0.118	POLA1	DNA polymerase alpha 1, catalytic subunit
ILMN_1751897	0.4242	0.00716	2.78909	-2.48238	0.0467	PM20D1	peptidase M20 domain containing 1
ILMN_1757338	0.3982	0.00505	-2.91638	-2.18533	-0.408	PLSCR4	phospholipid scramblase 4
ILMN_1736176	0.3703	0.00378	3.01932	-1.93812	0.219	PLK1	polo like kinase 1
ILMN_1797822	0.4246	0.00754	-2.76987	-2.5264	-0.54	SEL1L3	SEL1L family member 3
ILMN_1709256	0.4208	0.00696	-2.79988	-2.45758	-0.0502	PLEC	plectin
ILMN_1815719	0.4145	0.00645	-2.82767	-2.39337	-0.491	PLCG2	phospholipase C gamma 2
ILMN_1724066	0.4166	0.00673	-2.81211	-2.42939	-0.437	PLCB2	phospholipase C beta 2
ILMN_1786601	0.44	0.00871	2.71622	-2.64802	0.351	PLAGL2	PLAG1 like zinc finger 2
ILMN_1715991	0.3525	0.00267	-3.14068	-1.63899	-0.714	SDPR	serum deprivation response
ILMN_1797184	0.4246	0.00728	2.78296	-2.49644	0.314	PKN3	protein kinase N3
ILMN_1815308	0.5131	0.0182	-2.43013	-3.26558	-0.504	SDC1	syndecan 1
ILMN_2401436	0.3566	0.00287	3.11479	-1.70349	0.207	PKMYT1	protein kinase, membrane associated tyrosine/threonine 1
ILMN_2383383	0.383	0.00432	2.9723	-2.0518	0.472	PIR	pirin
ILMN_1772537	0.3432	0.00226	-3.19658	-1.49852	-1.25	SCTR	secretin receptor
ILMN_1783645	0.4246	0.00742	-2.77595	-2.51249	-0.0738	PIK3R6	phosphoinositide-3-kinase regulatory subunit 6
ILMN_1670306	0.5627	0.0277	-2.25914	-3.60845	-1.21	SCGB3A2	secretoglobin family 3A member 2
ILMN_1673529	0.3692	0.00366	-3.03089	-1.90996	-0.332	PHYKPL	5-phosphohydroxy-L-lysine phospho-lyase
ILMN_1776723	0.366	0.00351	-3.0452	-1.87501	-0.368	PHF11	PHD finger protein 11
ILMN_1696087	0.3692	0.00366	3.03093	-1.90985	0.367	PHB2	prohibitin 2
ILMN_1706841	0.3982	0.00525	2.90257	-2.21803	0.473	PGAM4	phosphoglycerate mutase family member 4
ILMN_2080611	0.44	0.00872	2.71609	-2.64832	0.237	PDSS1	prenyl (decaprenyl) diphosphate synthase, subunit 1
ILMN_1698912	0.3161	0.00119	3.41037	-0.9462	0.117	PDF	peptide deformylase (mitochondrial)
ILMN_1797684	0.3982	0.00534	2.89601	-2.23351	0.312	PDCD2	programmed cell death 2
ILMN_1802699	0.3566	0.00315	3.08298	-1.78224	0.0943	PCK2	phosphoenolpyruvate carboxykinase 2, mitochondrial
ILMN_1656574	0.3959	0.0048	2.93446	-2.14234	0.311	PCGF6	polycomb group ring finger 6
ILMN_1670383	0.3698	0.00373	3.02401	-1.92671	0.438	PCDH7	protocadherin 7
ILMN_1805132	0.3421	0.00166	3.30152	-1.23032	0.308	PCDH19	protocadherin 19
ILMN_1680782	0.3541	0.00277	3.12697	-1.67321	0.309	PATL1	PAT1 homolog 1, processing body mRNA decay factor
ILMN_1679666	0.5669	0.0286	-2.24499	-3.63591	-1.36	SCGB3A1	secretoglobin family 3A member 1
ILMN_2395692	0.3833	0.0044	2.96552	-2.06807	0.0527	PARK2	parkin RBR E3 ubiquitin protein ligase
ILMN_2410428	0.4246	0.00731	2.78154	-2.49971	0.0976	PARG	poly(ADP-ribose) glycohydrolase
ILMN_2316918	0.3816	0.00407	2.99345	-2.00081	0.394	PANK1	pantothenate kinase 1
ILMN_1722276	0.3939	0.00461	-2.94894	-2.10779	-0.4	PAFAH1B1	platelet activating factor acetylhydrolase 1b regulatory subunit 1
ILMN_1716488	0.416	0.00653	2.82311	-2.40395	0.476	PACS1	phosphofurin acidic cluster sorting protein 1
ILMN_1768284	0.4237	0.00714	-2.79027	-2.47967	-0.37	P2RY8	purinergic receptor P2Y8
ILMN_1664094	0.405	0.00565	-2.87559	-2.28157	-0.383	P2RY13	purinergic receptor P2Y13
ILMN_1772703	0.3432	0.00236	3.18203	-1.53525	0.221	OTUD6B	OTU domain containing 6B
ILMN_1731070	0.3541	0.00278	3.12628	-1.67492	0.215	ORC6	origin recognition complex subunit 6
ILMN_1727459	0.2698	0.000483	3.70145	-0.15855	0.227	ORC1	origin recognition complex subunit 1
ILMN_1735042	0.3703	0.00383	3.01457	-1.94967	0.0686	OR4N4	olfactory receptor family 4 subfamily N member 4
ILMN_1655713	0.3432	0.0024	3.17709	-1.54768	0.06	OR2M7	olfactory receptor family 2 subfamily M member 7
ILMN_1863920	0.3007	0.000887	-3.5073	-0.68829	-0.0662	OR10C1	olfactory receptor family 10 subfamily C member 1 (gene/pseudogene)
ILMN_1655347	0.4319	0.008	-2.7481	-2.57596	-1.77	SCGB1A1	secretoglobin family 1A member 1
ILMN_1759277	0.0999	2.31e-05	4.60918	2.51361	0.243	OIP5	Opa interacting protein 5
ILMN_1671288	0.44	0.00859	2.72176	-2.63556	0.15	ODF2	outer dense fiber of sperm tails 2
ILMN_1702197	0.4119	0.00634	2.83393	-2.37886	0.579	SAPCD2	suppressor APC domain containing 2
ILMN_1804834	0.4137	0.00642	2.82937	-2.38943	0.326	OARD1	O-acyl-ADP-ribose deacylase 1
ILMN_1801216	0.6249	0.0486	2.01458	-4.06261	1.34	S100P	S100 calcium binding protein P
ILMN_1783287	0.547	0.0254	-2.29523	-3.53777	-0.528	S100A14	S100 calcium binding protein A14
ILMN_2407168	0.4629	0.011	-2.62842	-2.8432	-0.564	S100A13	S100 calcium binding protein A13
ILMN_1658695	0.3673	0.00354	3.04245	-1.88174	0.207	NUF2	NUF2, NDC80 kinetochore complex component
ILMN_1765499	0.4433	0.00933	2.69063	-2.70541	0.0568	NTAN1	N-terminal asparagine amidase
ILMN_1756623	0.437	0.00821	2.73842	-2.59792	0.0577	NT5C1B	5'-nucleotidase, cytosolic IB
ILMN_1665319	0.3989	0.00548	2.88644	-2.25606	0.243	NRTN	neurturin
ILMN_1775759	0.383	0.00427	2.97621	-2.04238	0.269	NRAS	neuroblastoma RAS viral oncogene homolog
ILMN_2312587	0.4177	0.00685	-2.80534	-2.445	-0.0482	NRAP	nebulin related anchoring protein
ILMN_1779897	0.4463	0.00963	-2.67862	-2.73221	-0.0877	NPR1	natriuretic peptide receptor 1
ILMN_2186137	0.4246	0.00745	-2.77451	-2.51578	-0.754	RRAD	RRAD, Ras related glycolysis inhibitor and calcium channel regulator
ILMN_1724194	0.3703	0.00385	-3.01296	-1.95358	-0.489	NPEPL1	aminopeptidase-like 1
ILMN_2184640	0.3006	0.000813	3.53555	-0.61229	0.447	NOLC1	nucleolar and coiled-body phosphoprotein 1
ILMN_1683179	0.5138	0.0183	-2.42878	-3.26836	-0.564	RRAD	RRAD, Ras related glycolysis inhibitor and calcium channel regulator
ILMN_2062620	0.3982	0.00545	2.88905	-2.24992	0.111	NMT2	N-myristoyltransferase 2
ILMN_1784783	0.44	0.00892	-2.70759	-2.66744	-0.258	NME5	NME/NM23 family member 5
ILMN_1693430	0.4101	0.00624	2.83989	-2.36501	0.228	NME1-NME2	NME1-NME2 readthrough
ILMN_2310896	0.383	0.00439	-2.96653	-2.06564	-0.306	NLRP3	NLR family pyrin domain containing 3
ILMN_1709880	0.5843	0.0345	2.16551	-3.78747	0.53	RPLP0	ribosomal protein lateral stalk subunit P0
ILMN_2399328	0.3959	0.00483	2.93181	-2.14866	0.479	NELFB	negative elongation factor complex member B
ILMN_2108357	0.4119	0.00633	2.83431	-2.37797	0.712	RPL39L	ribosomal protein L39 like
ILMN_1653822	0.4119	0.00628	2.83731	-2.371	0.19	NEK2	NIMA related kinase 2
ILMN_1760741	0.4417	0.00917	2.69718	-2.69076	0.397	NDUFA9	NADH:ubiquinone oxidoreductase subunit A9
ILMN_1670535	0.3525	0.00261	-3.14743	-1.62214	-0.231	NDRG2	NDRG family member 2
ILMN_2361603	0.3937	0.00458	-2.95099	-2.10288	-0.372	NDRG2	NDRG family member 2
ILMN_1664511	0.4246	0.00738	2.77785	-2.50816	0.247	NDC80	NDC80, kinetochore complex component
ILMN_1749930	0.3923	0.00452	2.95604	-2.0908	0.266	NDC1	NDC1 transmembrane nucleoporin
ILMN_1785005	0.2998	0.00075	-3.56162	-0.54181	-0.394	NCF4	neutrophil cytosolic factor 4
ILMN_1796642	0.397	0.00494	-2.92426	-2.16662	-0.251	NCF2	neutrophil cytosolic factor 2
ILMN_1712413	0.4809	0.0127	2.57151	-2.96707	0.61	RPL39L	ribosomal protein L39 like
ILMN_1775008	0.3566	0.00286	3.11642	-1.69944	0.486	NCAPD2	non-SMC condensin I complex subunit D2
ILMN_1808041	0.4913	0.0152	2.5027	-3.11402	0.645	RPL10A	ribosomal protein L10a
ILMN_1716895	0.2998	0.000726	3.57218	-0.51318	0.582	RPA3	replication protein A3
ILMN_2315569	0.4062	0.00584	-2.86354	-2.30981	-0.286	N6AMT1	N-6 adenine-specific DNA methyltransferase 1 (putative)
ILMN_2344650	0.3982	0.00543	-2.89015	-2.24731	-0.321	N4BP2L1	NEDD4 binding protein 2 like 1
ILMN_1799487	0.3982	0.00544	-2.88952	-2.24882	-0.332	N4BP2L1	NEDD4 binding protein 2 like 1
ILMN_1764764	0.4066	0.00592	-2.85875	-2.32101	-0.427	MUM1	melanoma associated antigen (mutated) 1
ILMN_1742569	0.3432	0.00231	3.18978	-1.5157	0.403	MTPAP	mitochondrial poly(A) polymerase
ILMN_1811234	0.3703	0.00382	-3.01551	-1.94738	-0.7	ROS1	ROS proto-oncogene 1, receptor tyrosine kinase
ILMN_1785324	0.3937	0.00457	2.9522	-2.1	0.24	MTHFD1	methylenetetrahydrofolate dehydrogenase, cyclohydrolase and formyltetrahydrofolate synthetase 1
ILMN_1671565	0.3982	0.00516	-2.90834	-2.20438	-0.539	RNASET2	ribonuclease T2
ILMN_1657898	0.4392	0.00853	2.72425	-2.62994	0.293	MTFP1	mitochondrial fission process 1
ILMN_2388517	0.3566	0.00308	3.09113	-1.76212	0.0506	MTERF2	mitochondrial transcription termination factor 2
ILMN_1703006	0.4246	0.00725	2.7845	-2.49293	0.261	MTCH1	mitochondrial carrier 1
ILMN_2228180	0.4119	0.0063	-2.83596	-2.37413	-0.353	MSRA	methionine sulfoxide reductase A
ILMN_2373285	0.4311	0.00794	-2.75079	-2.56987	-0.205	MSR1	macrophage scavenger receptor 1
ILMN_1675708	0.4475	0.00975	2.67412	-2.74222	0.109	MSH5	mutS homolog 5
ILMN_1737413	0.4525	0.01	2.6625	-2.76802	0.131	MSH2	mutS homolog 2
ILMN_1790537	0.3432	0.00202	3.23528	-1.40028	0.596	RMI2	RecQ mediated genome instability 2
ILMN_1807633	0.2451	0.000163	4.03679	0.79419	0.548	RIDA	reactive intermediate imine deaminase A homolog
ILMN_1741264	0.383	0.00435	2.96944	-2.05865	0.441	MRPS33	mitochondrial ribosomal protein S33
ILMN_1802553	0.3566	0.003	3.10001	-1.74015	0.428	MRPS24	mitochondrial ribosomal protein S24
ILMN_1815043	0.3745	0.00391	3.00692	-1.96822	0.368	MRPS2	mitochondrial ribosomal protein S2
ILMN_1721337	0.3631	0.00332	3.06463	-1.82739	0.314	MRPS18B	mitochondrial ribosomal protein S18B
ILMN_2097421	0.3575	0.0032	3.07738	-1.79604	0.368	MRPL51	mitochondrial ribosomal protein L51
ILMN_1699603	0.3982	0.00517	2.90749	-2.20638	0.437	MRPL12	mitochondrial ribosomal protein L12
ILMN_2316540	0.4246	0.00742	2.77587	-2.51268	0.374	MRPL11	mitochondrial ribosomal protein L11
ILMN_1672428	0.1342	4.13e-05	4.44197	2.00067	0.0762	MROH6	maestro heat like repeat family member 6
ILMN_1693702	0.3692	0.00371	3.02596	-1.92197	0.205	MRFAP1L1	Morf4 family associated protein 1 like 1
ILMN_1656011	0.5142	0.0186	-2.42261	-3.28108	-0.656	RGS1	regulator of G-protein signaling 1
ILMN_1798288	0.4417	0.00923	-2.69457	-2.69661	-0.439	MOB3C	MOB kinase activator 3C
ILMN_2174394	0.4119	0.0063	2.8364	-2.37311	0.277	MMS19	MMS19 homolog, cytosolic iron-sulfur assembly component
ILMN_1715788	0.2451	0.000144	-4.07384	0.90217	-0.114	MMRN2	multimerin 2
ILMN_1660114	0.4062	0.00575	-2.86943	-2.29603	-0.204	MMRN1	multimerin 1
ILMN_1800787	0.3541	0.00277	-3.12787	-1.67095	-0.529	RFTN1	raftlin, lipid raft linker 1
ILMN_1751886	0.5212	0.0207	-2.37864	-3.37095	-0.569	REC8	REC8 meiotic recombination protein
ILMN_1657495	0.437	0.00818	-2.73982	-2.59475	-0.362	MLEC	malectin
ILMN_1734827	0.2451	0.000127	4.11001	1.00805	0.338	MKI67	marker of proliferation Ki-67
ILMN_1653453	0.4062	0.00578	2.86742	-2.30072	0.0707	MID1	midline 1
ILMN_1687387	0.366	0.00345	3.05169	-1.85915	0.0591	MGST1	microsomal glutathione S-transferase 1
ILMN_1764577	0.2481	0.000173	-4.0184	0.74081	-0.466	MFNG	MFNG O-fucosylpeptide 3-beta-N-acetylglucosaminyltransferase
ILMN_2120210	0.3432	0.00234	-3.18459	-1.52879	-0.7	RCAN2	regulator of calcineurin 2
ILMN_2280731	0.3982	0.00538	2.89339	-2.23968	0.198	METTL23	methyltransferase like 23
ILMN_2276811	0.2642	0.000211	-3.95762	0.56523	-0.28	METTL17	methyltransferase like 17
ILMN_2340877	0.2778	0.000609	3.62808	-0.36075	0.275	MEN1	menin 1
ILMN_1721457	0.3959	0.00485	2.93083	-2.15099	0.523	RANBP1	RAN binding protein 1
ILMN_1731184	0.4263	0.00768	2.76337	-2.54123	0.42	MELK	maternal embryonic leucine zipper kinase
ILMN_1660462	0.416	0.00653	-2.82292	-2.4044	-0.409	MCOLN2	mucolipin 2
ILMN_1704702	0.437	0.00836	2.73176	-2.61298	0.116	MCM7	minichromosome maintenance complex component 7
ILMN_1815169	0.4295	0.00782	2.75678	-2.55623	0.47	MCM5	minichromosome maintenance complex component 5
ILMN_1748578	0.3566	0.00282	3.12112	-1.68775	0.619	RAD21	RAD21 cohesin complex component
ILMN_1709795	0.44	0.00884	-2.71092	-2.65993	-0.608	RAC2	ras-related C3 botulinum toxin substrate 2 (rho family, small GTP binding protein Rac2)
ILMN_1806818	0.3366	0.00155	3.32371	-1.17289	0.414	MCM3	minichromosome maintenance complex component 3
ILMN_2052373	0.2997	0.000676	-3.59501	-0.45109	-0.906	RAB17	RAB17, member RAS oncogene family
ILMN_1692219	0.4668	0.0115	-2.60984	-2.88387	-0.549	RAB11FIP1	RAB11 family interacting protein 1
ILMN_1745513	0.3703	0.00382	3.01506	-1.94848	0.319	MCAT	malonyl-CoA-acyl carrier protein transacylase
ILMN_2409793	0.3432	0.002	3.23882	-1.39125	0.401	MAZ	MYC associated zinc finger protein
ILMN_1815107	0.433	0.00806	-2.74556	-2.58173	-0.285	MATR3	matrin 3
ILMN_1665943	0.3982	0.0052	-2.90585	-2.21025	-0.486	MAP4K1	mitogen-activated protein kinase kinase kinase kinase 1
ILMN_1727360	0.383	0.00421	-2.9814	-2.02989	-0.348	MAOB	monoamine oxidase B
ILMN_1713807	0.3215	0.00133	-3.37479	-1.03972	-0.385	MAN1C1	mannosidase alpha class 1C member 1
ILMN_1739798	0.3167	0.0013	3.38305	-1.01806	0.445	MALSU1	mitochondrial assembly of ribosomal large subunit 1
ILMN_1713985	0.3982	0.00519	2.90608	-2.20971	0.368	MAF1	MAF1 homolog, negative regulator of RNA polymerase III
ILMN_1743583	0.3692	0.00361	-3.03544	-1.89886	-0.29	MADD	MAP kinase activating death domain
ILMN_2411282	0.4417	0.00921	-2.6956	-2.6943	-0.613	QSOX1	quiescin sulfhydryl oxidase 1
ILMN_2112460	0.3982	0.00513	2.91075	-2.19865	0.0808	MAD2L1	MAD2 mitotic arrest deficient-like 1 (yeast)
ILMN_2358074	0.3973	0.00496	2.9228	-2.17008	0.123	MAD1L1	MAD1 mitotic arrest deficient like 1
ILMN_1753196	0.4629	0.0111	2.6263	-2.84785	0.523	PTTG1	pituitary tumor-transforming 1
ILMN_2210753	0.3982	0.00544	-2.88949	-2.24888	-0.105	LYVE1	lymphatic vessel endothelial hyaluronan receptor 1
ILMN_2383300	0.3526	0.00268	-3.1384	-1.64469	-0.524	PTPRU	protein tyrosine phosphatase, receptor type U
ILMN_1721046	0.5182	0.0203	2.38753	-3.3529	0.543	PTMS	parathymosin
ILMN_1688753	0.0724	1.04e-05	4.83473	3.21749	0.555	PTDSS1	phosphatidylserine synthase 1
ILMN_1759772	0.4414	0.00911	-2.69947	-2.68563	-0.432	LRRC56	leucine rich repeat containing 56
ILMN_1774389	0.3959	0.00476	-2.93758	-2.1349	-0.317	LRRC36	leucine rich repeat containing 36
ILMN_1734552	0.3413	0.00161	3.31191	-1.20346	0.0706	LRRC20	leucine rich repeat containing 20
ILMN_1715616	0.383	0.00428	2.97499	-2.04533	0.343	LRR1	leucine rich repeat protein 1
ILMN_1742789	0.4177	0.00685	-2.80539	-2.44489	-0.405	LPXN	leupaxin
ILMN_1839019	0.3161	0.00116	-3.4189	-0.92368	-0.481	LPP	LIM domain containing preferred translocation partner in lipoma
ILMN_1651254	0.366	0.0035	-3.04664	-1.87149	-0.41	LPP	LIM domain containing preferred translocation partner in lipoma
ILMN_1692938	0.2698	0.000508	3.68535	-0.20314	0.724	PSAT1	phosphoserine aminotransferase 1
ILMN_1796461	0.5365	0.0237	-2.32319	-3.4824	-0.549	PRSS8	protease, serine 8
ILMN_1708363	0.437	0.00841	2.72955	-2.61797	0.077	LOXL1	lysyl oxidase like 1
ILMN_1856993	0.4236	0.00708	2.79341	-2.47246	0.0511	LOC728084	uncharacterized LOC728084
ILMN_2198893	0.3566	0.00303	3.09611	-1.74979	0.459	LOC407835	mitogen-activated protein kinase kinase 2 pseudogene
ILMN_1764029	0.2698	0.000494	-3.69462	-0.17749	-0.211	LOC339059	uncharacterized LOC339059
ILMN_1853834	0.3432	0.00222	3.20298	-1.48233	0.0485	LOC338694	uncharacterized LOC338694
ILMN_1878506	0.366	0.0035	3.04645	-1.87196	0.0512	LOC286087	uncharacterized LOC286087
ILMN_1843259	0.4246	0.00747	2.77341	-2.5183	0.0716	LOC105370068	uncharacterized LOC105370068
ILMN_1916599	0.3827	0.00417	2.9843	-2.02291	0.0828	LOC100133985	uncharacterized LOC100133985
ILMN_1668249	0.4295	0.00781	-2.75692	-2.55591	-0.208	LMF1	lipase maturation factor 1
ILMN_1754969	0.3982	0.00541	-2.89117	-2.24492	-0.448	LMCD1	LIM and cysteine rich domains 1
ILMN_1903528	0.383	0.00424	2.97863	-2.03656	0.0632	LINC00445	long intergenic non-protein coding RNA 445
ILMN_1760493	0.4246	0.00737	-2.77866	-2.5063	-0.238	LIMS2	LIM zinc finger domain containing 2
ILMN_1671928	0.3432	0.00238	-3.17936	-1.54197	-0.692	PROS1	protein S (alpha)
ILMN_2241825	0.3295	0.0014	3.35695	-1.08637	0.0639	LDB3	LIM domain binding 3
ILMN_1800697	0.3823	0.00412	-2.98874	-2.01218	-0.493	LDB2	LIM domain binding 2
ILMN_2336186	0.4101	0.0062	2.84211	-2.35982	0.327	LCMT1	leucine carboxyl methyltransferase 1
ILMN_1688452	0.4475	0.00967	2.6769	-2.73602	0.302	LCMT1	leucine carboxyl methyltransferase 1
ILMN_1653282	0.4237	0.00714	2.78999	-2.48033	0.0521	LCE2A	late cornified envelope 2A
ILMN_1768969	0.437	0.00837	2.73131	-2.61399	0.268	LBR	lamin B receptor
ILMN_1696921	0.4236	0.00706	2.79422	-2.47061	0.0529	LATS1	large tumor suppressor kinase 1
ILMN_1761946	0.4858	0.0147	-2.51498	-3.08801	-0.669	PROM2	prominin 2
ILMN_1716822	0.4246	0.00737	-2.77855	-2.50655	-0.0492	KRTAP9-2	keratin associated protein 9-2
ILMN_2112942	0.3432	0.00195	-3.24735	-1.36948	-0.0589	KRTAP6-1	keratin associated protein 6-1
ILMN_1730848	0.4246	0.0076	2.76739	-2.53206	0.133	KRT18	keratin 18
ILMN_1652008	0.3432	0.00227	3.19618	-1.49953	0.245	KNSTRN	kinetochore localized astrin/SPAG5 binding protein
ILMN_1780349	0.3762	0.00395	-3.0032	-1.97723	-0.676	PRG4	proteoglycan 4
ILMN_1728934	0.2698	0.000294	3.85568	0.27401	0.743	PRC1	protein regulator of cytokinesis 1
ILMN_1700031	0.6238	0.0465	2.03461	-4.02705	0.614	PRAME	preferentially expressed antigen in melanoma
ILMN_1799667	0.3432	0.00202	3.23507	-1.40081	0.384	KIF4A	kinesin family member 4A
ILMN_1685916	0.4246	0.00758	2.76797	-2.53072	0.471	KIF2C	kinesin family member 2C
ILMN_1811472	0.2698	0.00026	3.89403	0.38308	0.363	KIF23	kinesin family member 23
ILMN_2054392	0.2698	0.000276	3.87568	0.33081	0.501	PPIL1	peptidylprolyl isomerase like 1
ILMN_2143155	0.2698	0.000388	3.76969	0.03161	0.482	KIF11	kinesin family member 11
ILMN_1794539	0.2698	0.000418	3.74713	-0.03149	0.471	KIF11	kinesin family member 11
ILMN_1770800	0.4863	0.0149	-2.51038	-3.09776	-0.586	PODN	podocan
ILMN_1813635	0.3295	0.00139	3.35973	-1.07912	0.424	KIAA1429	KIAA1429
ILMN_1780667	0.4744	0.0122	2.58774	-2.93196	0.528	POC1A	POC1 centriolar protein A
ILMN_1781537	0.4062	0.00587	2.86218	-2.31301	0.0671	KDM1B	lysine demethylase 1B
ILMN_1662587	0.5044	0.0169	-2.4606	-3.20238	-0.609	PNPLA7	patatin like phospholipase domain containing 7
ILMN_1858612	0.36	0.00328	3.06931	-1.8159	0.0561	KCNK9	potassium two pore domain channel subfamily K member 9
ILMN_1717702	0.3989	0.00548	-2.8865	-2.25592	-0.309	KCNK17	potassium two pore domain channel subfamily K member 17
ILMN_1787948	0.3525	0.00258	3.1524	-1.6097	0.0655	KCNIP4	potassium voltage-gated channel interacting protein 4
ILMN_2047618	0.3428	0.00179	-3.27582	-1.29654	-0.0856	KCNE1	potassium voltage-gated channel subfamily E regulatory subunit 1
ILMN_1792125	0.3566	0.00314	3.08431	-1.77895	0.0562	KCNA2	potassium voltage-gated channel subfamily A member 2
ILMN_1692896	0.3525	0.00265	3.14253	-1.63438	0.26	JMJD4	jumonji domain containing 4
ILMN_1742330	0.5131	0.0182	-2.4305	-3.26482	-0.513	PLXNB1	plexin B1
ILMN_1781099	0.3432	0.00191	3.25487	-1.35025	0.339	ISY1	ISY1 splicing factor homolog
ILMN_2405264	0.4417	0.00919	2.69613	-2.69312	0.0718	ISM2	isthmin 2
ILMN_1751171	0.3144	0.00104	3.45656	-0.82387	0.37	IRF2BP1	interferon regulatory factor 2 binding protein 1
ILMN_1689220	0.3161	0.00117	3.41624	-0.9307	0.215	IQCE	IQ motif containing E
ILMN_1795388	0.3007	0.000871	3.51317	-0.67254	0.149	INSM2	INSM transcriptional repressor 2
ILMN_1744212	0.383	0.00433	-2.97133	-2.05413	-0.463	INPP5D	inositol polyphosphate-5-phosphatase D
ILMN_1797557	0.4662	0.0113	-2.61716	-2.86786	-0.504	PLEKHA6	pleckstrin homology domain containing A6
ILMN_2355738	0.3432	0.00194	3.24918	-1.3648	0.33	INCENP	inner centromere protein
ILMN_1797631	0.3161	0.00113	3.42927	-0.89627	0.055	IL4I1	interleukin 4 induced 1
ILMN_1804901	0.383	0.00427	2.97613	-2.04257	0.417	IL36RN	interleukin 36 receptor antagonist
ILMN_1684349	0.4094	0.00612	-2.84696	-2.34854	-0.447	IL2RB	interleukin 2 receptor subunit beta
ILMN_1652825	0.4056	0.00569	-2.87299	-2.28768	-0.43	IL10RA	interleukin 10 receptor subunit alpha
ILMN_1795762	0.4177	0.00686	-2.8051	-2.44557	-0.66	PLEK	pleckstrin
ILMN_1655504	0.3566	0.00293	-3.10803	-1.72027	-0.114	IFT81	intraflagellar transport 81
ILMN_1810191	0.4166	0.00673	-2.81203	-2.42956	-0.528	PLA2G4C	phospholipase A2 group IVC
ILMN_1752923	0.3566	0.00314	-3.08403	-1.77965	-0.363	IFNAR1	interferon alpha and beta receptor subunit 1
ILMN_1721549	0.5769	0.0315	-2.20411	-3.71444	-0.857	PLA2G1B	phospholipase A2 group IB
ILMN_1700584	0.3798	0.00403	-2.99631	-1.99391	-0.241	IER2	immediate early response 2
ILMN_1763297	0.2698	0.000221	3.94311	0.52352	0.0795	ICE1	interactor of little elongation complex ELL subunit 1
ILMN_1673649	0.44	0.00861	2.72049	-2.6384	0.446	HYOU1	hypoxia up-regulated 1
ILMN_1747078	0.3982	0.00513	2.91028	-2.19978	0.241	HYLS1	HYLS1, centriolar and ciliogenesis associated
ILMN_1747204	0.3541	0.00273	3.13295	-1.65829	0.311	HTRA2	HtrA serine peptidase 2
ILMN_1766658	0.1885	7.34e-05	4.27382	1.49333	0.581	PKMYT1	protein kinase, membrane associated tyrosine/threonine 1
ILMN_1764850	0.44	0.00889	-2.70892	-2.66444	-0.447	HPCAL1	hippocalcin like 1
ILMN_1781942	0.2698	0.000349	3.80312	0.12547	0.492	HMMR	hyaluronan mediated motility receptor
ILMN_1748283	0.4401	0.00897	-2.70532	-2.67252	-0.592	PIM2	Pim-2 proto-oncogene, serine/threonine kinase
ILMN_1685387	0.2698	0.00035	-3.80208	0.12253	-1.75	PIGR	polymeric immunoglobulin receptor
ILMN_1704537	0.5701	0.0293	2.23593	-3.65342	0.734	PHGDH	phosphoglycerate dehydrogenase
ILMN_1734472	0.5142	0.0187	-2.42004	-3.28637	-0.516	PEBP4	phosphatidylethanolamine binding protein 4
ILMN_1703906	0.3692	0.0036	3.0367	-1.89579	0.493	HJURP	Holliday junction recognition protein
ILMN_2353697	0.3692	0.00368	3.02882	-1.915	0.263	HINFP	histone H4 transcription factor
ILMN_1760985	0.4155	0.0065	2.82495	-2.39969	0.0671	HFE2	hemochromatosis type 2 (juvenile)
ILMN_2397954	0.366	0.0035	-3.04588	-1.87335	-0.509	PARP3	poly(ADP-ribose) polymerase family member 3
ILMN_1742025	0.5932	0.0365	-2.14163	-3.83213	-0.648	OLFM1	olfactomedin 1
ILMN_1765621	0.4392	0.00853	2.72416	-2.63014	0.344	HDGF	hepatoma-derived growth factor
ILMN_2196984	0.032	1.31e-06	5.40408	5.04388	0.663	OIP5	Opa interacting protein 5
ILMN_1791771	0.4283	0.00773	-2.76088	-2.54691	-0.446	HCK	HCK proto-oncogene, Src family tyrosine kinase
ILMN_1772731	0.4311	0.00793	-2.75157	-2.56807	-0.455	HAGH	hydroxyacylglutathione hydrolase
ILMN_1654441	0.4295	0.00784	2.75574	-2.5586	0.551	OAT	ornithine aminotransferase
ILMN_1721136	0.4301	0.00789	-2.75338	-2.56396	-0.32	H6PD	hexose-6-phosphate dehydrogenase/glucose 1-dehydrogenase
ILMN_1658247	0.5285	0.0219	-2.35658	-3.41554	-0.511	OAS1	2'-5'-oligoadenylate synthetase 1
ILMN_2200331	0.1032	2.75e-05	4.55895	2.35869	0.416	H2AFX	H2A histone family member X
ILMN_1773964	0.4481	0.0098	2.67215	-2.74659	0.337	H1FX	H1 histone family member X
ILMN_1742577	0.4062	0.00589	2.86092	-2.31595	0.443	GTPBP4	GTP binding protein 4
ILMN_1811378	0.4062	0.00587	2.86177	-2.31396	0.0876	GTPBP1	GTP binding protein 1
ILMN_1655921	0.408	0.00598	2.85486	-2.33009	0.301	GTF2E1	general transcription factor IIE subunit 1
ILMN_1726720	0.4301	0.00789	2.75313	-2.56453	0.556	NUSAP1	nucleolar and spindle associated protein 1
ILMN_1810560	0.4401	0.00893	-2.70703	-2.66868	-0.648	NUPR1	nuclear protein 1, transcriptional regulator
ILMN_2404688	0.4417	0.00917	-2.69692	-2.69135	-0.644	NUPR1	nuclear protein 1, transcriptional regulator
ILMN_1670817	0.4295	0.00785	2.75492	-2.56047	0.345	GRPEL1	GrpE like 1, mitochondrial
ILMN_2353030	0.4417	0.00916	-2.69756	-2.68991	-0.0507	GRAP	GRB2-related adaptor protein
ILMN_2102201	0.4009	0.00554	2.88254	-2.26524	0.0523	GPR19	G protein-coupled receptor 19
ILMN_1684227	0.4475	0.00969	-2.67634	-2.73727	-0.0839	GPR146	G protein-coupled receptor 146
ILMN_1742782	0.3348	0.00143	3.35006	-1.10437	0.125	GPANK1	G-patch domain and ankyrin repeats 1
ILMN_1728107	0.308	0.000972	-3.47781	-0.76724	-0.357	GNG7	G protein subunit gamma 7
ILMN_1720114	0.3432	0.00187	3.26169	-1.33279	0.465	GMNN	geminin, DNA replication inhibitor
ILMN_2110252	0.2698	0.000276	3.87587	0.33135	0.679	NPM3	nucleophosmin/nucleoplasmin 3
ILMN_1670532	0.3161	0.00106	3.44847	-0.84536	0.383	GMCL1	germ cell-less, spermatogenesis associated 1
ILMN_2194627	0.4166	0.00664	2.81695	-2.4182	0.343	GMCL1	germ cell-less, spermatogenesis associated 1
ILMN_2162253	0.4062	0.00579	2.8667	-2.30242	0.924	NMU	neuromedin U
ILMN_1771962	0.3982	0.00509	2.9136	-2.19192	0.282	GLI3	GLI family zinc finger 3
ILMN_1915711	0.3982	0.00511	2.91185	-2.19605	0.0486	GIT2	GIT ArfGAP 2
ILMN_1754272	0.4261	0.00765	2.76483	-2.53789	0.315	GINS3	GINS complex subunit 3
ILMN_1715864	0.3939	0.00464	-2.94681	-2.11287	-0.679	NHS	NHS actin remodeling regulator
ILMN_1747305	0.3525	0.00267	-3.13975	-1.64133	-0.321	GIMAP8	GTPase, IMAP family member 8
ILMN_1776678	0.396	0.00489	-2.92749	-2.15893	-0.486	GIMAP7	GTPase, IMAP family member 7
ILMN_1769383	0.4442	0.00943	-2.68671	-2.71417	-0.44	GIMAP5	GTPase, IMAP family member 5
ILMN_1696380	0.4062	0.00575	-2.86914	-2.29669	-0.179	GHRL	ghrelin/obestatin prepropeptide
ILMN_2051373	0.3692	0.00368	3.02854	-1.9157	0.706	NEK2	NIMA related kinase 2
ILMN_1701724	0.3973	0.00497	2.92182	-2.1724	0.477	GET4	golgi to ER traffic protein 4
ILMN_2364088	0.3783	0.00401	-2.99857	-1.98845	-0.239	GEMIN8	gem nuclear organelle associated protein 8
ILMN_2344002	0.4101	0.00621	2.84113	-2.3621	0.296	GEMIN2	gem nuclear organelle associated protein 2
ILMN_1687768	0.585	0.0348	-2.16186	-3.79434	-0.528	NCOA7	nuclear receptor coactivator 7
ILMN_1751444	0.3161	0.00122	3.40324	-0.96498	0.508	NCAPG	non-SMC condensin I complex subunit G
ILMN_1694472	0.3432	0.0023	3.19175	-1.51073	0.0703	GCK	glucokinase
ILMN_2098418	0.4062	0.00586	2.86261	-2.312	0.373	GATSL3	GATS protein like 3
ILMN_2109416	0.3816	0.00409	-2.99138	-2.00581	-0.696	NAPSB	napsin B aspartic peptidase, pseudogene
ILMN_1784040	0.4009	0.00554	-2.88283	-2.26457	-1.15	NAPSA	napsin A aspartic peptidase
ILMN_1660086	0.4858	0.0138	-2.54052	-3.03363	-0.863	MYH11	myosin heavy chain 11
ILMN_1794552	0.4101	0.00616	2.84438	-2.35454	0.164	GAP43	growth associated protein 43
ILMN_1804351	0.4492	0.00985	2.66996	-2.75145	0.374	FZD7	frizzled class receptor 7
ILMN_2163906	0.4263	0.00767	2.76353	-2.54086	0.0661	FUT10	fucosyltransferase 10
ILMN_1674706	0.3827	0.00414	2.98666	-2.0172	0.607	MTHFD2	methylenetetrahydrofolate dehydrogenase (NADP+ dependent) 2, methenyltetrahydrofolate cyclohydrolase
ILMN_1730670	0.4246	0.0073	-2.78226	-2.49805	-0.481	FSTL3	follistatin like 3
ILMN_1700081	0.416	0.00656	2.82119	-2.40839	0.422	FST	follistatin
ILMN_1774028	0.3703	0.0038	3.01719	-1.94331	0.527	MTFR1	mitochondrial fission regulator 1
ILMN_1768049	0.3692	0.00368	-3.02871	-1.91527	-0.0592	FOXP3	forkhead box P3
ILMN_2250923	0.437	0.00833	-2.73322	-2.60967	-0.0853	FOXP1	forkhead box P1
ILMN_1682495	0.4414	0.00909	-2.70042	-2.6835	-0.21	FOXP1	forkhead box P1
ILMN_1665304	0.4137	0.00641	2.82964	-2.38881	0.056	FOXN3	forkhead box N3
ILMN_1707464	0.4527	0.0101	-2.65874	-2.77635	-0.944	MST1	macrophage stimulating 1
ILMN_1797731	0.4246	0.00748	-2.77293	-2.5194	-0.597	MS4A6A	membrane spanning 4-domains A6A
ILMN_1781867	0.3982	0.00507	-2.91483	-2.18899	-0.17	FOXD4L1	forkhead box D4-like 1
ILMN_2085441	0.4489	0.00983	-2.6707	-2.74982	-0.164	FOXD4L1	forkhead box D4-like 1
ILMN_1721035	0.4329	0.00804	-2.74633	-2.57998	-0.627	MS4A6A	membrane spanning 4-domains A6A
ILMN_1687501	0.437	0.00825	-2.73662	-2.60199	-0.514	MOXD1	monooxygenase DBH like 1
ILMN_1795342	0.3959	0.00473	-2.93975	-2.12974	-0.934	MLPH	melanophilin
ILMN_2078124	0.366	0.00348	-3.04846	-1.86705	-0.0661	FMO6P	flavin containing monooxygenase 6 pseudogene
ILMN_1732158	0.4246	0.00755	-2.76952	-2.5272	-0.437	FMO2	flavin containing monooxygenase 2
ILMN_1671885	0.0999	1.95e-05	4.65674	2.66093	0.622	MLF2	myeloid leukemia factor 2
ILMN_1665738	0.409	0.00609	-2.84829	-2.34543	-0.116	FLI1	Fli-1 proto-oncogene, ETS transcription factor
ILMN_1800889	0.397	0.00494	-2.92438	-2.16634	-0.265	FIG4	FIG4 phosphoinositide 5-phosphatase
ILMN_1805842	0.3541	0.00274	-3.13067	-1.66399	-0.464	FHL1	four and a half LIM domains 1
ILMN_1812517	0.3366	0.00147	3.34272	-1.12349	0.0814	FGF8	fibroblast growth factor 8
ILMN_1751460	0.3478	0.00251	3.16147	-1.58695	0.0957	FEV	FEV, ETS transcription factor
ILMN_1755834	0.2698	0.000337	3.81363	0.15509	0.468	FEN1	flap structure-specific endonuclease 1
ILMN_2071809	0.4863	0.0149	-2.51068	-3.09712	-0.569	MGP	matrix Gla protein
ILMN_1815734	0.3827	0.00414	-2.98686	-2.01673	-0.382	FCHSD2	FCH and double SH3 domains 2
ILMN_1705302	0.437	0.0084	-2.73004	-2.61687	-0.458	FCGRT	Fc fragment of IgG receptor and transporter
ILMN_1804174	0.2698	0.000552	-3.65943	-0.27466	-0.264	FCGR2B	Fc fragment of IgG receptor IIb
ILMN_2382403	0.3566	0.00315	-3.08236	-1.78377	-0.155	FCGR2B	Fc fragment of IgG receptor IIb
ILMN_1766914	0.4066	0.00592	-2.85856	-2.32145	-0.699	MFAP4	microfibrillar associated protein 4
ILMN_2212909	0.3091	0.000995	3.47029	-0.78729	0.693	MELK	maternal embryonic leucine zipper kinase
ILMN_2412860	0.2698	0.000358	3.795	0.10262	0.592	MCM4	minichromosome maintenance complex component 4
ILMN_2350266	0.4236	0.00709	2.79281	-2.47386	0.299	FBXO46	F-box protein 46
ILMN_1663379	0.3982	0.00541	2.89173	-2.2436	0.275	FBXL15	F-box and leucine rich repeat protein 15
ILMN_1737205	0.4246	0.00746	2.77418	-2.51654	0.586	MCM4	minichromosome maintenance complex component 4
ILMN_1726756	0.3007	0.000859	3.51777	-0.66015	0.152	FANCB	Fanconi anemia complementation group B
ILMN_1777322	0.357	0.00318	3.07937	-1.79113	0.278	FAM91A1	family with sequence similarity 91 member A1
ILMN_1681503	0.3432	0.0023	3.19169	-1.51088	0.652	MCM2	minichromosome maintenance complex component 2
ILMN_2413898	0.2698	0.000518	3.67965	-0.21887	0.544	MCM10	minichromosome maintenance 10 replication initiation factor
ILMN_1701882	0.3432	0.00186	3.26273	-1.33013	0.188	FAM72D	family with sequence similarity 72 member D
ILMN_1794038	0.4208	0.00696	-2.79968	-2.45805	-0.154	FAM49A	family with sequence similarity 49 member A
ILMN_1762713	0.4858	0.0145	-2.52235	-3.07236	-0.639	MCEMP1	mast cell expressed membrane protein 1
ILMN_1717219	0.3703	0.0038	3.0169	-1.94399	0.423	FAM220A	family with sequence similarity 220 member A
ILMN_1797475	0.4062	0.00573	-2.87091	-2.29256	-0.334	FAM216B	family with sequence similarity 216 member B
ILMN_1731503	0.4967	0.0158	-2.48695	-3.14721	-0.734	MARCO	macrophage receptor with collagenous structure
ILMN_2415474	0.366	0.00345	3.05129	-1.86012	0.107	FAM19A4	family with sequence similarity 19 member A4, C-C motif chemokine like
ILMN_1691876	0.4166	0.00678	2.8095	-2.4354	0.046	FAM19A2	family with sequence similarity 19 member A2, C-C motif chemokine like
ILMN_2063168	0.6249	0.0486	-2.01471	-4.06237	-0.522	MALL	mal, T-cell differentiation protein like
ILMN_1690329	0.4475	0.00975	-2.67381	-2.74291	-0.213	FAM118B	family with sequence similarity 118 member B
ILMN_1773006	0.3161	0.00106	-3.44878	-0.84453	-0.203	FABP4	fatty acid binding protein 4
ILMN_1679158	0.3421	0.00168	-3.2969	-1.24224	-0.403	FAAH2	fatty acid amide hydrolase 2
ILMN_2370622	0.4212	0.00698	-2.79873	-2.46022	-0.0693	F8	coagulation factor VIII
ILMN_1675083	0.44	0.00885	-2.71052	-2.66085	-0.178	F8	coagulation factor VIII
ILMN_1659725	0.3432	0.00209	3.22299	-1.43155	0.459	EXOSC5	exosome component 5
ILMN_1815012	0.4246	0.00743	-2.77534	-2.5139	-0.35	EXOC7	exocyst complex component 7
ILMN_1673721	0.3432	0.00208	3.22452	-1.42767	0.445	EXO1	exonuclease 1
ILMN_1661577	0.569	0.029	-2.23908	-3.64734	-0.536	MAFA	MAF bZIP transcription factor A
ILMN_1742145	0.3982	0.00526	2.90132	-2.22096	0.196	ESPL1	extra spindle pole bodies like 1, separase
ILMN_1777564	0.3432	0.00188	3.2595	-1.33839	0.538	MAD2L1	MAD2 mitotic arrest deficient-like 1 (yeast)
ILMN_2334204	0.2998	0.000783	3.54752	-0.57997	0.162	ERCC6L	ERCC excision repair 6 like, spindle assembly checkpoint helicase
ILMN_1775931	0.4218	0.00701	-2.797	-2.46421	-0.376	EPHA3	EPH receptor A3
ILMN_1722309	0.3982	0.00508	2.9142	-2.1905	0.444	ENDOG	endonuclease G
ILMN_1709593	0.4046	0.00563	2.87703	-2.27818	0.0678	EN1	engrailed homeobox 1
ILMN_1797074	0.3432	0.00242	3.17349	-1.55675	0.453	EMG1	EMG1, N1-specific pseudouridine methyltransferase
ILMN_1750102	0.44	0.00881	2.71193	-2.65767	0.118	EME1	essential meiotic structure-specific endonuclease 1
ILMN_1764873	0.4062	0.00585	-2.86319	-2.31062	-0.238	ELAVL1	ELAV like RNA binding protein 1
ILMN_1706635	0.4425	0.00928	-2.69273	-2.70072	-0.249	ELANE	elastase, neutrophil expressed
ILMN_1794967	0.382	0.0041	2.99036	-2.00828	0.3	EIF4ENIF1	eukaryotic translation initiation factor 4E nuclear import factor 1
ILMN_2197225	0.4246	0.00759	-2.76779	-2.53114	-0.276	EIF4EBP3	eukaryotic translation initiation factor 4E binding protein 3
ILMN_1728083	0.4032	0.00559	2.87935	-2.27274	0.342	EIF4EBP2	eukaryotic translation initiation factor 4E binding protein 2
ILMN_1713380	0.3432	0.00221	3.20515	-1.47684	0.379	EIF2B2	eukaryotic translation initiation factor 2B subunit beta
ILMN_1726138	0.3421	0.00169	3.29493	-1.24733	0.483	EI24	EI24, autophagy associated transmembrane protein
ILMN_1774063	0.3585	0.00322	3.07476	-1.8025	0.0701	EDEM3	ER degradation enhancing alpha-mannosidase like protein 3
ILMN_2275248	0.3575	0.00321	3.07653	-1.79813	0.318	ECE2	endothelin converting enzyme 2
ILMN_1815205	0.3959	0.0048	-2.93407	-2.14328	-1.18	LYZ	lysozyme
ILMN_1797522	0.4162	0.00661	-2.81862	-2.41433	-0.439	DUSP3	dual specificity phosphatase 3
ILMN_1675941	0.4295	0.00782	2.75649	-2.55689	0.0678	DUSP15	dual specificity phosphatase 15
ILMN_1807825	0.3703	0.00377	-3.02025	-1.93587	-0.679	LY86	lymphocyte antigen 86
ILMN_1779711	0.4401	0.009	2.70393	-2.67564	0.251	DTL	denticleless E3 ubiquitin protein ligase homolog
ILMN_1658259	0.3295	0.0014	3.35835	-1.08272	0.471	DRG1	developmentally regulated GTP binding protein 1
ILMN_1708107	0.4475	0.00969	-2.67621	-2.73757	-0.469	DPT	dermatopontin
ILMN_1770048	0.4442	0.0094	2.6878	-2.71173	0.23	DPH5	diphthamide biosynthesis 5
ILMN_2049184	0.1222	3.51e-05	-4.4889	2.14382	-0.325	DNASE1L3	deoxyribonuclease 1 like 3
ILMN_2376204	0.2451	0.000166	-4.03105	0.77753	-0.846	LTB	lymphotoxin beta
ILMN_1799516	0.366	0.00347	3.04908	-1.86552	0.439	DNAJC9	DnaJ heat shock protein family (Hsp40) member C9
ILMN_1810436	0.4442	0.00944	-2.68615	-2.71542	-0.207	DNAJC27	DnaJ heat shock protein family (Hsp40) member C27
ILMN_1685052	0.2998	0.000772	-3.55233	-0.56696	-0.358	DNAH1	dynein axonemal heavy chain 1
ILMN_1732537	0.2698	0.000395	3.76461	0.01738	0.421	DNAAF5	dynein axonemal assembly factor 5
ILMN_2282959	0.3161	0.00128	3.38882	-1.00293	0.171	DNA2	DNA replication helicase/nuclease 2
ILMN_1749829	0.3432	0.0022	3.20704	-1.47204	0.419	DLGAP5	DLG associated protein 5
ILMN_2043918	0.4156	0.00651	2.82433	-2.40112	0.332	DLEU1	deleted in lymphocytic leukemia 1
ILMN_2401987	0.4339	0.00809	-2.74413	-2.58496	-0.179	DLEC1	deleted in lung and esophageal cancer 1
ILMN_1813517	0.3566	0.00297	3.10359	-1.73128	0.206	DISP2	dispatched RND transporter family member 2
ILMN_1706100	0.4178	0.00687	2.80416	-2.44772	0.0478	DICER1	dicer 1, ribonuclease III
ILMN_1695226	0.4166	0.00669	2.81404	-2.42494	0.118	DIAPH3	diaphanous related formin 3
ILMN_1744308	0.3215	0.00133	3.37586	-1.03691	0.464	DHX33	DEAH-box helicase 33
ILMN_1807206	0.4442	0.00946	-2.68546	-2.71694	-0.391	DHRS1	dehydrogenase/reductase 1
ILMN_1667213	0.3768	0.00398	3.00131	-1.9818	0.296	DFFA	DNA fragmentation factor subunit alpha
ILMN_1679405	0.366	0.00342	3.054	-1.85348	0.354	DDX56	DEAD-box helicase 56
ILMN_1747303	0.4339	0.00809	2.74381	-2.5857	0.392	DDX39A	DEAD-box helicase 39A
ILMN_1790100	0.3692	0.00363	3.03367	-1.90317	0.285	DDIAS	DNA damage induced apoptosis suppressor
ILMN_2124352	0.44	0.00867	2.71797	-2.64408	0.392	DCUN1D5	defective in cullin neddylation 1 domain containing 5
ILMN_1757631	0.3421	0.00177	3.27911	-1.28808	0.473	DBNDD1	dysbindin domain containing 1
ILMN_2376205	0.2451	0.000156	-4.04956	0.83135	-1.06	LTB	lymphotoxin beta
ILMN_2097259	0.383	0.00427	-2.97643	-2.04186	-0.13	CYP2U1	cytochrome P450 family 2 subfamily U member 1
ILMN_1702171	0.4366	0.00816	-2.74082	-2.59248	-0.825	LPCAT1	lysophosphatidylcholine acyltransferase 1
ILMN_1806010	0.3421	0.00167	-3.29895	-1.23696	-0.282	CUL9	cullin 9
ILMN_1773018	0.3366	0.00155	3.32483	-1.16998	0.37	CUEDC2	CUE domain containing 2
ILMN_1743032	0.44	0.00883	-2.71117	-2.65937	-0.384	CTSS	cathepsin S
ILMN_2179083	0.4442	0.00943	-2.68646	-2.71472	-0.812	LOXL4	lysyl oxidase like 4
ILMN_1653129	0.2537	0.000198	3.97788	0.62362	0.45	CSTF2	cleavage stimulation factor subunit 2
ILMN_1665797	0.3053	0.000938	3.48916	-0.73691	0.433	CSE1L	chromosome segregation 1 like
ILMN_1720484	0.3432	0.00192	-3.25174	-1.35826	-0.347	CRTAP	cartilage associated protein
ILMN_2225735	0.3421	0.00175	-3.28396	-1.27561	-0.372	CRBN	cereblon
ILMN_1681325	0.4062	0.00574	2.87009	-2.29447	0.254	CPTP	ceramide-1-phosphate transfer protein
ILMN_1677038	0.4237	0.00713	-2.79052	-2.47911	-0.4	CPED1	cadherin like and PC-esterase domain containing 1
ILMN_1666364	0.383	0.00437	-2.96791	-2.06233	-0.366	COQ10A	coenzyme Q10A
ILMN_1757415	0.2698	0.000478	3.705	-0.1487	0.285	COA7	cytochrome c oxidase assembly factor 7 (putative)
ILMN_1669674	0.4101	0.00623	2.84047	-2.36364	0.35	CNPY3	canopy FGF signaling regulator 3
ILMN_2064860	0.383	0.00421	2.98116	-2.03047	0.552	LGALS7B	galectin 7B
ILMN_2086612	0.3432	0.00197	-3.24292	-1.38078	-0.497	CMAHP	cytidine monophospho-N-acetylneuraminic acid hydroxylase, pseudogene
ILMN_1704084	0.4519	0.01	-2.66396	-2.76477	-0.435	CMAHP	cytidine monophospho-N-acetylneuraminic acid hydroxylase, pseudogene
ILMN_1778203	0.3478	0.00249	-3.16444	-1.57949	-0.401	CLN5	ceroid-lipofuscinosis, neuronal 5
ILMN_1658569	0.5142	0.0189	2.41581	-3.29507	0.595	LGALS7B	galectin 7B
ILMN_1782729	0.4414	0.0091	-2.69976	-2.68499	-0.199	CLECL1	C-type lectin like 1
ILMN_1780465	0.44	0.00885	-2.71053	-2.66083	-0.354	CLEC5A	C-type lectin domain family 5 member A
ILMN_1723115	0.3366	0.00153	-3.32949	-1.15787	-0.168	CLEC4F	C-type lectin domain family 4 member F
ILMN_2399363	0.4498	0.0099	-2.66809	-2.75562	-0.376	CLEC4A	C-type lectin domain family 4 member A
ILMN_1682176	0.4177	0.00686	-2.80473	-2.44641	-0.494	CLEC3B	C-type lectin domain family 3 member B
ILMN_2053415	0.456	0.0104	-2.65052	-2.79452	-0.633	LDLR	low density lipoprotein receptor
ILMN_1662932	0.5119	0.018	-2.43558	-3.25432	-0.528	LCP1	lymphocyte cytosolic protein 1
ILMN_1752968	0.3959	0.00474	-2.9387	-2.13223	-0.507	LAMB2	laminin subunit beta 2
ILMN_2079655	0.4101	0.00623	-2.84031	-2.36402	-0.507	KLRB1	killer cell lectin like receptor B1
ILMN_1735930	0.4062	0.00576	-2.86859	-2.29799	-0.608	KLF2	Kruppel like factor 2
ILMN_2222008	0.3432	0.00225	3.1989	-1.49264	0.604	KIFC1	kinesin family member C1
ILMN_1695658	0.3421	0.00175	3.28435	-1.2746	0.564	KIF20A	kinesin family member 20A
ILMN_1751776	0.3053	0.000928	3.49272	-0.72738	0.484	CKAP2L	cytoskeleton associated protein 2 like
ILMN_1674411	0.3959	0.00485	2.9306	-2.15155	0.302	CKAP2	cytoskeleton associated protein 2
ILMN_1674661	0.3525	0.00264	-3.14406	-1.63054	-0.442	CIRBP	cold inducible RNA binding protein
ILMN_1773363	0.4166	0.00673	-2.81187	-2.42993	-0.223	CIITA	class II major histocompatibility complex transactivator
ILMN_1794011	0.4062	0.00588	-2.8614	-2.31482	-0.13	CHST2	carbohydrate sulfotransferase 2
ILMN_2395240	0.2698	0.000418	3.74684	-0.03229	0.41	CHEK2	checkpoint kinase 2
ILMN_2395236	0.4287	0.00775	2.76006	-2.54877	0.332	CHEK2	checkpoint kinase 2
ILMN_1664630	0.2698	0.00035	3.8022	0.12287	0.428	CHEK1	checkpoint kinase 1
ILMN_1677376	0.4166	0.00678	2.80905	-2.43646	0.386	CHD7	chromodomain helicase DNA binding protein 7
ILMN_2158003	0.4449	0.00952	-2.68282	-2.72283	-0.575	KIAA1683	KIAA1683
ILMN_1705813	0.4246	0.00725	-2.78484	-2.49215	-0.461	CFTR	cystic fibrosis transmembrane conductance regulator
ILMN_2285996	0.3366	0.00156	3.32279	-1.17527	0.699	KIAA0101	KIAA0101
ILMN_1724293	0.4236	0.00711	2.79193	-2.47587	0.513	KDELR2	KDEL endoplasmic reticulum protein retention receptor 2
ILMN_1711988	0.4819	0.0129	2.56575	-2.97948	0.794	KCNK12	potassium two pore domain channel subfamily K member 12
ILMN_2105441	0.5044	0.0166	-2.46716	-3.18868	-0.94	JCHAIN	joining chain of multimeric IgA and IgM
ILMN_2223805	0.396	0.00488	2.92847	-2.15661	0.343	CEP41	centrosomal protein 41
ILMN_1763907	0.3432	0.00185	3.26467	-1.32515	0.406	CENPW	centromere protein W
ILMN_1787477	0.2324	0.000105	4.16857	1.18047	0.258	CENPO	centromere protein O
ILMN_1778723	0.3939	0.00462	-2.94767	-2.11084	-0.534	JAML	junction adhesion molecule like
ILMN_1654396	0.4858	0.0146	-2.51859	-3.08036	-0.67	ITGB2	integrin subunit beta 2
ILMN_2368721	0.2698	0.00053	3.67192	-0.24021	0.374	CENPM	centromere protein M
ILMN_2175912	0.5579	0.0271	-2.2683	-3.59061	-0.579	ITGB2	integrin subunit beta 2
ILMN_1742779	0.3421	0.00177	3.28021	-1.28525	0.368	CENPL	centromere protein L
ILMN_1782412	0.5412	0.0248	-2.3044	-3.51968	-0.817	IRX2	iroquois homeobox 2
ILMN_1716279	0.383	0.00439	2.96647	-2.06581	0.304	CENPE	centromere protein E
ILMN_2392472	0.2698	0.000437	3.73319	-0.07035	0.331	CENPA	centromere protein A
ILMN_1666594	0.4583	0.0106	-2.6411	-2.81531	-0.54	IRF8	interferon regulatory factor 8
ILMN_2400947	0.4254	0.00763	-2.76584	-2.5356	-0.351	CELF2	CUGBP, Elav-like family member 2
ILMN_1686516	0.3959	0.00485	2.9306	-2.15154	0.147	CELF1	CUGBP, Elav-like family member 1
ILMN_1781149	0.2698	0.00038	-3.77646	0.05057	-1.02	INMT	indolethylamine N-methyltransferase
ILMN_1750324	0.6237	0.046	2.03942	-4.01848	0.518	IGFBP5	insulin like growth factor binding protein 5
ILMN_2234187	0.3161	0.00111	-3.4342	-0.8832	-0.15	CDO1	cysteine dioxygenase type 1
ILMN_1807423	0.308	0.000964	3.48046	-0.76017	1.04	IGF2BP3	insulin like growth factor 2 mRNA binding protein 3
ILMN_1811636	0.3982	0.00545	-2.88874	-2.25065	-0.651	IFT57	intraflagellar transport 57
ILMN_1673352	0.416	0.00655	-2.82201	-2.40648	-0.513	IFITM2	interferon induced transmembrane protein 2
ILMN_1710428	0.2422	0.000118	4.13339	1.07675	0.234	CDK1	cyclin dependent kinase 1
ILMN_1687384	0.5758	0.031	-2.21178	-3.6998	-0.538	IFI6	interferon alpha inducible protein 6
ILMN_1806165	0.525	0.0215	-2.3638	-3.40098	-0.556	HSPA6	heat shock protein family A (Hsp70) member 6
ILMN_2153916	0.4599	0.0107	2.6385	-2.82104	0.632	HSPA2	heat shock protein family A (Hsp70) member 2
ILMN_2383964	0.3692	0.00363	3.03349	-1.90361	0.182	CDCA4	cell division cycle associated 4
ILMN_1753183	0.4295	0.00777	2.7589	-2.5514	0.36	CDCA4	cell division cycle associated 4
ILMN_1766499	0.4858	0.0135	2.54954	-3.01432	0.682	HSPA2	heat shock protein family A (Hsp70) member 2
ILMN_1779855	0.44	0.00884	-2.7109	-2.65999	-0.921	HSD17B6	hydroxysteroid 17-beta dehydrogenase 6
ILMN_2407619	0.3161	0.00115	3.42267	-0.91373	0.221	CDC25C	cell division cycle 25C
ILMN_1725260	0.3432	0.00242	3.17351	-1.55669	0.281	CDC25C	cell division cycle 25C
ILMN_1711005	0.2998	0.00079	3.54489	-0.58706	0.35	CDC25A	cell division cycle 25A
ILMN_2409220	0.2698	0.000512	3.68319	-0.2091	0.521	HMMR	hyaluronan mediated motility receptor
ILMN_1678605	0.3432	0.00219	3.20743	-1.47106	0.499	CDC123	cell division cycle 123
ILMN_1700681	0.4166	0.00668	-2.8148	-2.42318	-0.483	CD99L2	CD99 molecule like 2
ILMN_2311537	0.2698	0.000257	3.8977	0.39354	0.917	HMGA1	high mobility group AT-hook 1
ILMN_2066066	0.3566	0.00311	-3.08735	-1.77145	-0.776	HLA-DRB6	major histocompatibility complex, class II, DR beta 6 (pseudogene)
ILMN_1689655	0.4858	0.0146	-2.51934	-3.07876	-0.619	HLA-DRA	major histocompatibility complex, class II, DR alpha
ILMN_2157441	0.4882	0.015	-2.50833	-3.1021	-0.542	HLA-DRA	major histocompatibility complex, class II, DR alpha
ILMN_1661266	0.3432	0.00199	-3.24071	-1.38645	-1.18	HLA-DQB1	major histocompatibility complex, class II, DQ beta 1
ILMN_1772218	0.4782	0.0125	-2.57951	-2.94976	-0.691	HLA-DPA1	major histocompatibility complex, class II, DP alpha 1
ILMN_1659075	0.559	0.0272	-2.26626	-3.59459	-0.661	HLA-DOA	major histocompatibility complex, class II, DO alpha
ILMN_1761733	0.4583	0.0106	-2.64294	-2.81125	-0.613	HLA-DMB	major histocompatibility complex, class II, DM beta
ILMN_1718754	0.3566	0.00311	-3.08694	-1.77246	-0.462	CD207	CD207 molecule
ILMN_2335754	0.4459	0.00959	-2.68005	-2.72901	-0.425	CD1E	CD1e molecule
ILMN_1719433	0.3432	0.00202	-3.23535	-1.40011	-0.186	CD1D	CD1d molecule
ILMN_1654210	0.3295	0.0014	-3.35795	-1.08378	-0.452	CD1C	CD1c molecule
ILMN_1695311	0.491	0.0152	-2.50331	-3.11272	-0.631	HLA-DMA	major histocompatibility complex, class II, DM alpha
ILMN_1741180	0.44	0.00874	-2.715	-2.65077	-0.507	HEXDC	hexosaminidase D
ILMN_1702265	0.2451	0.000149	-4.06375	0.87271	-0.502	HDHD2	haloacid dehalogenase like hydrolase domain containing 2
ILMN_1792323	0.2698	0.000567	-3.6508	-0.29839	-0.539	HDC	histidine decarboxylase
ILMN_1712803	0.3566	0.00299	3.10068	-1.7385	0.443	CCNB1	cyclin B1
ILMN_1737041	0.383	0.00425	-2.97751	-2.03925	-0.903	HABP2	hyaluronan binding protein 2
ILMN_1785756	0.0452	3.7e-06	5.12091	4.12765	0.744	H2AFX	H2A histone family member X
ILMN_1668134	0.3982	0.00509	2.91366	-2.19176	0.621	GSTM1	glutathione S-transferase mu 1
ILMN_1692948	0.4212	0.00698	2.79849	-2.46079	0.186	CCDC90B	coiled-coil domain containing 90B
ILMN_1792681	0.3566	0.00289	3.11263	-1.70887	0.352	CCDC86	coiled-coil domain containing 86
ILMN_1657680	0.3982	0.00536	-2.89452	-2.23703	-0.13	CCDC69	coiled-coil domain containing 69
ILMN_1815326	0.3566	0.00302	-3.09762	-1.74607	-0.218	CCDC68	coiled-coil domain containing 68
ILMN_1745904	0.4142	0.00643	2.82849	-2.39148	0.336	CCDC6	coiled-coil domain containing 6
ILMN_1772588	0.3959	0.00484	-2.93149	-2.14942	-0.134	CCDC170	coiled-coil domain containing 170
ILMN_1762255	0.3982	0.00526	2.90183	-2.21978	0.506	GSTM1	glutathione S-transferase mu 1
ILMN_1657361	0.4246	0.00735	-2.77976	-2.50378	-0.444	CBX7	chromobox 7
ILMN_1730101	0.4319	0.00799	-2.74851	-2.57503	-0.523	GSPT2	G1 to S phase transition 2
ILMN_1774086	0.3432	0.00216	3.21329	-1.45619	0.249	CBX3	chromobox 3
ILMN_1711617	0.3432	0.00223	-3.20194	-1.48495	-0.51	GMFG	glia maturation factor gamma
ILMN_2401057	0.4425	0.00927	-2.69279	-2.70058	-0.353	CANX	calnexin
ILMN_1810992	0.4377	0.00845	2.72777	-2.62198	0.269	CAD	carbamoyl-phosphate synthetase 2, aspartate transcarbamylase, and dihydroorotase
ILMN_1768533	0.4145	0.00647	2.82631	-2.39654	0.049	CACNA2D1	calcium voltage-gated channel auxiliary subunit alpha2delta 1
ILMN_2188722	0.3432	0.00201	-3.2369	-1.39616	-1	GLS	glutaminase
ILMN_1809590	0.3982	0.00537	2.89438	-2.23736	0.623	GINS2	GINS complex subunit 2
ILMN_1692188	0.5962	0.0373	-2.13235	-3.84936	-0.574	GGTLC1	gamma-glutamyltransferase light chain 1
ILMN_1656242	0.4311	0.00795	2.75048	-2.57057	0.0526	C1R	complement C1r subcomponent
ILMN_1695740	0.4414	0.00913	2.69889	-2.68694	0.0719	C1QTNF8	C1q and tumor necrosis factor related protein 8
ILMN_1681754	0.3541	0.00274	3.13156	-1.66175	0.694	GGH	gamma-glutamyl hydrolase
ILMN_1907042	0.2491	0.000181	-4.00445	0.70039	-0.464	C1orf132	chromosome 1 open reading frame 132
ILMN_2188862	0.3982	0.00538	-2.8932	-2.24015	-1.11	GDF15	growth differentiation factor 15
ILMN_1730575	0.4311	0.00797	2.7496	-2.57255	0.583	GCLC	glutamate-cysteine ligase catalytic subunit
ILMN_2038778	0.3421	0.00176	3.28089	-1.2835	0.527	GAPDH	glyceraldehyde-3-phosphate dehydrogenase
ILMN_1701243	0.3541	0.00275	3.13035	-1.66478	0.317	C10orf2	chromosome 10 open reading frame 2
ILMN_1676548	0.3566	0.00294	3.10653	-1.724	0.464	BZW2	basic leucine zipper and W2 domains 2
ILMN_1802252	0.3432	0.00242	3.17368	-1.55627	0.531	GAPDH	glyceraldehyde-3-phosphate dehydrogenase
ILMN_1778764	0.408	0.00602	2.85263	-2.3353	0.356	BUB3	BUB3, mitotic checkpoint protein
ILMN_2202948	0.4046	0.00564	2.87653	-2.27936	0.41	BUB1	BUB1 mitotic checkpoint serine/threonine kinase
ILMN_1343295	0.3692	0.00359	3.03759	-1.89362	0.534	GAPDH	glyceraldehyde-3-phosphate dehydrogenase
ILMN_1803570	0.3525	0.00263	3.14545	-1.62708	0.124	BRI3BP	BRI3 binding protein
ILMN_1800619	0.4094	0.00611	2.84724	-2.34789	0.268	BRI3BP	BRI3 binding protein
ILMN_1652472	0.3703	0.00384	3.01392	-1.95124	0.288	BRAF	B-Raf proto-oncogene, serine/threonine kinase
ILMN_1810680	0.3161	0.00121	3.40649	-0.95644	0.433	BOLA2	bolA family member 2
ILMN_1682661	0.4046	0.00563	-2.8768	-2.27873	-0.15	BMP3	bone morphogenetic protein 3
ILMN_1803124	0.2698	0.000482	3.70221	-0.15645	0.273	BIRC5	baculoviral IAP repeat containing 5
ILMN_1752728	0.2698	0.000471	-3.70951	-0.13619	-0.685	FUCA1	fucosidase, alpha-L- 1, tissue
ILMN_1716246	0.3421	0.00171	-3.29063	-1.25843	-0.542	FRZB	frizzled-related protein
ILMN_2371147	0.3692	0.00371	3.02583	-1.92229	0.372	BCL7C	BCL tumor suppressor 7C
ILMN_2179837	0.2698	0.000324	3.82581	0.18945	0.405	BANF1	barrier to autointegration factor 1
ILMN_1749243	0.3432	0.00182	3.27045	-1.31031	0.262	BANF1	barrier to autointegration factor 1
ILMN_2344971	0.0999	2.46e-05	4.59097	2.45737	0.787	FOXM1	forkhead box M1
ILMN_1652865	0.3783	0.004	-2.99883	-1.98781	-0.0847	BAIAP2	BAI1 associated protein 2
ILMN_2206141	0.437	0.00838	2.73097	-2.61477	0.273	BAGE5	B melanoma antigen family member 5
ILMN_2268855	0.2698	0.000319	3.83055	0.20284	0.132	BAG5	BCL2 associated athanogene 5
ILMN_1780188	0.3541	0.00272	3.13393	-1.65586	0.192	B3GALNT2	beta-1,3-N-acetylgalactosaminyltransferase 2
ILMN_1716400	0.2015	8.67e-05	4.22461	1.34657	0.548	FOXM1	forkhead box M1
ILMN_1725427	0.4236	0.0071	-2.79249	-2.47458	-0.426	B2M	beta-2-microglobulin
ILMN_1751607	0.3423	0.00178	-3.27763	-1.29188	-1.39	FOSB	FosB proto-oncogene, AP-1 transcription factor subunit
ILMN_1787280	0.0724	9.86e-06	4.84936	3.26358	0.439	AUNIP	aurora kinase A and ninein interacting protein
ILMN_2271627	0.4263	0.00766	2.76401	-2.53977	0.365	ATXN2L	ataxin 2 like
ILMN_1783956	0.3816	0.00408	-2.99243	-2.00328	-0.332	ATP8B4	ATPase phospholipid transporting 8B4 (putative)
ILMN_1661733	0.2698	0.000544	-3.66417	-0.26159	-1.47	FOLR1	folate receptor 1
ILMN_1775285	0.4525	0.01	-2.66266	-2.76767	-0.112	ATP13A5	ATPase 13A5
ILMN_2346339	0.3421	0.00176	-3.28178	-1.28121	-1.33	FOLR1	folate receptor 1
ILMN_1805665	0.3982	0.00544	-2.8891	-2.24979	-0.826	FLRT3	fibronectin leucine rich transmembrane protein 3
ILMN_1780060	0.44	0.00883	-2.71109	-2.65957	-0.969	FCN3	ficolin 3
ILMN_2397776	0.3982	0.00531	2.89802	-2.22876	0.239	ASB6	ankyrin repeat and SOCS box containing 6
ILMN_1661492	0.4166	0.00666	2.81577	-2.42092	0.258	ARRDC1	arrestin domain containing 1
ILMN_1762582	0.4429	0.0093	-2.69164	-2.70315	-0.104	ARNT	aryl hydrocarbon receptor nuclear translocator
ILMN_1769810	0.4401	0.009	-2.70417	-2.6751	-0.457	ARL6IP5	ADP ribosylation factor like GTPase 6 interacting protein 5
ILMN_1777550	0.437	0.00824	2.73718	-2.60071	0.0479	ARL13A	ADP ribosylation factor like GTPase 13A
ILMN_1803423	0.4417	0.00921	-2.69529	-2.69498	-0.409	ARHGEF6	Rac/Cdc42 guanine nucleotide exchange factor 6
ILMN_1717403	0.2698	0.000378	3.77835	0.05587	0.195	ARHGEF39	Rho guanine nucleotide exchange factor 39
ILMN_1718984	0.366	0.00348	-3.04794	-1.86832	-0.698	FCGBP	Fc fragment of IgG binding protein
ILMN_1663916	0.4246	0.0074	-2.77685	-2.51043	-0.425	ARHGAP9	Rho GTPase activating protein 9
ILMN_1811392	0.2698	0.000338	-3.81305	0.15345	-0.472	ARHGAP45	Rho GTPase activating protein 45
ILMN_1777998	0.437	0.00839	-2.73035	-2.61617	-0.324	ARHGAP25	Rho GTPase activating protein 25
ILMN_2208413	0.3703	0.00385	-3.01229	-1.95521	-0.408	ARHGAP15	Rho GTPase activating protein 15
ILMN_2215881	0.2698	0.000502	3.68918	-0.19253	0.134	ARHGAP11B	Rho GTPase activating protein 11B
ILMN_2302757	0.4246	0.0075	-2.77228	-2.52088	-1.2	FCGBP	Fc fragment of IgG binding protein
ILMN_1764297	0.44	0.0088	-2.71247	-2.65645	-0.0693	ARF6	ADP ribosylation factor 6
ILMN_1726410	0.3432	0.00219	3.2073	-1.47138	0.497	APRT	adenine phosphoribosyltransferase
ILMN_1722491	0.4456	0.00958	2.68069	-2.72759	0.431	APRT	adenine phosphoribosyltransferase
ILMN_1697925	0.4519	0.01	-2.66443	-2.76373	-0.179	APOBR	apolipoprotein B receptor
ILMN_1667086	0.3432	0.00242	3.17333	-1.55715	0.415	AP3M1	adaptor related protein complex 3 mu 1 subunit
ILMN_2362122	0.3541	0.00279	3.12542	-1.67706	0.393	AP3M1	adaptor related protein complex 3 mu 1 subunit
ILMN_1662426	0.3566	0.00304	3.0955	-1.7513	0.466	AP2S1	adaptor related protein complex 2 sigma 1 subunit
ILMN_1699598	0.3566	0.00303	3.09685	-1.74797	0.405	AP2M1	adaptor related protein complex 2 mu 1 subunit
ILMN_1782086	0.2698	0.000267	-3.88559	0.35901	-0.276	AOC3	amine oxidase, copper containing 3
ILMN_1739645	0.3144	0.00103	3.45931	-0.81655	0.487	ANLN	anillin actin binding protein
ILMN_1688423	0.1921	7.87e-05	-4.25316	1.43162	-0.964	FCER1A	Fc fragment of IgE receptor Ia
ILMN_1675483	0.437	0.00838	-2.73089	-2.61494	-0.447	ANKMY1	ankyrin repeat and MYND domain containing 1
ILMN_1794470	0.3566	0.00294	-3.10653	-1.72398	-0.439	ANKFY1	ankyrin repeat and FYVE domain containing 1
ILMN_1669773	0.3432	0.00188	-3.26002	-1.33708	-0.0616	ANGPTL1	angiopoietin like 1
ILMN_1804812	0.3432	0.00192	3.25202	-1.35755	0.312	ANAPC1	anaphase promoting complex subunit 1
ILMN_1662681	0.3692	0.00371	-3.02525	-1.9237	-0.0787	AMBRA1	autophagy and beclin 1 regulator 1
ILMN_2223941	0.3007	0.000832	-3.52815	-0.63222	-0.59	FBLN5	fibulin 5
ILMN_1658301	0.2998	0.000716	-3.57627	-0.50208	-0.673	FAM83E	family with sequence similarity 83 member E
ILMN_1778173	0.4246	0.00758	-2.7683	-2.52997	-0.422	AK3	adenylate kinase 3
ILMN_1781943	0.2698	0.000559	3.65526	-0.28613	0.505	FAM83D	family with sequence similarity 83 member D
ILMN_2242299	0.4301	0.0079	-2.75294	-2.56496	-0.0655	AJAP1	adherens junctions associated protein 1
ILMN_1673252	0.3982	0.00542	2.89057	-2.24634	0.365	AIMP2	aminoacyl tRNA synthetase complex interacting multifunctional protein 2
ILMN_2290776	0.3366	0.00156	3.32246	-1.17613	0.282	AGBL5	ATP/GTP binding protein like 5
ILMN_1713266	0.4481	0.00979	-2.67233	-2.7462	-0.737	FAM46C	family with sequence similarity 46 member C
ILMN_2148944	0.3432	0.00207	-3.22706	-1.42121	-0.409	ADCY4	adenylate cyclase 4
ILMN_1672403	0.2698	0.000447	-3.72585	-0.09079	-0.28	ADAMTS8	ADAM metallopeptidase with thrombospondin type 1 motif 8
ILMN_1770152	0.3161	0.00127	3.39145	-0.99602	0.0674	ADAMTS18	ADAM metallopeptidase with thrombospondin type 1 motif 18
ILMN_1776442	0.4009	0.00554	-2.88267	-2.26492	-0.0487	ACTRT2	actin related protein T2
ILMN_1652594	0.4246	0.00728	-2.78301	-2.49634	-0.284	ACTR5	ARP5 actin-related protein 5 homolog
ILMN_1754538	0.3973	0.00499	2.92064	-2.17522	0.508	FAM213A	family with sequence similarity 213 member A
ILMN_1777170	0.3973	0.00497	-2.92213	-2.17168	-0.751	FAM183A	family with sequence similarity 183 member A
ILMN_1802096	0.3982	0.00537	-2.89403	-2.23817	-0.471	ABTB1	ankyrin repeat and BTB domain containing 1
ILMN_1763452	0.3432	0.00206	-3.22811	-1.41855	-0.571	EVI2B	ecotropic viral integration site 2B
ILMN_2318685	0.3717	0.00388	3.01028	-1.96007	0.364	ABHD12	abhydrolase domain containing 12
ILMN_1721225	0.3432	0.00239	3.1785	-1.54413	0.336	AAR2	AAR2 splicing factor homolog
ILMN_1668092	0.3566	0.00301	-3.09835	-1.74425	-0.709	ESAM	endothelial cell adhesion molecule
ILMN_1762899	0.5044	0.0164	-2.47147	-3.17966	-0.56	EGR1	early growth response 1
ILMN_1671568	0.5212	0.021	-2.37384	-3.38069	-0.52	ECHDC2	enoyl-CoA hydratase domain containing 2
ILMN_1675204	0.2698	0.000281	3.87039	0.31578	0.0863
ILMN_1875138	0.2698	0.000373	3.78218	0.06661	0.0987
ILMN_1859432	0.2698	0.000526	3.67447	-0.23318	0.0779
ILMN_1670124	0.2698	0.000531	3.67146	-0.2415	0.221
ILMN_1842655	0.2998	0.000692	3.58732	-0.47204	0.0614
ILMN_1871977	0.2998	0.000713	-3.57792	-0.49759	-0.0667
ILMN_1663696	0.2998	0.000713	3.57782	-0.49785	0.065
ILMN_1834156	0.2998	0.000752	-3.56067	-0.54439	-0.0731
ILMN_1910778	0.2998	0.000756	-3.5591	-0.54864	-0.0701
ILMN_2245627	0.2998	0.000779	3.54948	-0.57468	0.0791
ILMN_1698007	0.2998	0.000791	3.54433	-0.58858	0.0765
ILMN_1777233	0.383	0.00437	2.96805	-2.062	0.639	E2F2	E2F transcription factor 2
ILMN_1845146	0.2998	0.000799	-3.54134	-0.59667	-0.0635
ILMN_1679867	0.3007	0.000824	3.53112	-0.62424	0.476
ILMN_1916161	0.3007	0.000859	3.51772	-0.66031	0.0537
ILMN_1724064	0.3007	0.000863	3.51648	-0.66362	0.258
ILMN_1716445	0.3161	0.00109	3.43987	-0.8682	0.605	DTYMK	deoxythymidylate kinase
ILMN_1868244	0.3007	0.000879	3.51052	-0.67964	0.0598
ILMN_2352023	0.4967	0.0159	-2.48497	-3.15136	-0.529	DSTYK	dual serine/threonine and tyrosine protein kinase
ILMN_1767219	0.3053	0.000921	3.49539	-0.72021	0.343
ILMN_1794015	0.3053	0.000933	-3.49089	-0.73227	-0.0903
ILMN_1842275	0.3078	0.000952	3.48436	-0.74972	0.0686
ILMN_2252309	0.511	0.0175	-2.44784	-3.22892	-0.529	DPP7	dipeptidyl peptidase 7
ILMN_1820043	0.3161	0.00108	3.44333	-0.859	0.0581
ILMN_1845113	0.3161	0.0011	3.43711	-0.8755	0.0601
ILMN_1763765	0.3161	0.0012	3.40776	-0.95309	0.0655
ILMN_1687913	0.3161	0.00126	-3.39228	-0.99383	-0.0569
ILMN_1866766	0.3161	0.00127	3.391	-0.99718	0.0694
ILMN_1830772	0.3161	0.00128	3.3884	-1.00403	0.0698
ILMN_1838340	0.3295	0.00139	3.36068	-1.07664	0.0573
ILMN_1659553	0.3366	0.00149	3.3374	-1.13733	0.165
ILMN_1745501	0.383	0.00427	-2.97645	-2.04182	-0.755	DNALI1	dynein axonemal light intermediate chain 1
ILMN_1774288	0.3421	0.00168	3.29699	-1.24202	0.0685
ILMN_1855797	0.3421	0.0017	3.29283	-1.25275	0.107
ILMN_1839814	0.3421	0.00173	-3.28733	-1.26693	-0.0714
ILMN_1912732	0.3421	0.00174	3.2862	-1.26984	0.0593
ILMN_1723935	0.3432	0.00181	-3.27284	-1.30418	-0.415
ILMN_1797519	0.5639	0.0278	2.25702	-3.61258	0.553	DLK1	delta like non-canonical Notch ligand 1
ILMN_1868274	0.3432	0.00191	3.25397	-1.35256	0.0578
ILMN_1825144	0.3432	0.00196	-3.24534	-1.3746	-0.054
ILMN_1660168	0.3432	0.00203	3.23318	-1.40564	0.0652
ILMN_2052549	0.3432	0.00212	-3.21808	-1.44403	-0.0657
ILMN_1657673	0.3432	0.00214	3.21636	-1.44841	0.2
ILMN_1860487	0.3432	0.00214	-3.21497	-1.45194	-0.0683
ILMN_1764228	0.3366	0.00146	-3.34453	-1.11877	-0.614	DAB2	DAB2, clathrin adaptor protein
ILMN_1692684	0.3432	0.00233	3.18619	-1.52475	0.374
ILMN_1871124	0.3432	0.00234	-3.18538	-1.52679	-0.0567
ILMN_1683487	0.3432	0.00234	-3.18482	-1.52822	-0.126
ILMN_1872457	0.3432	0.00239	-3.17818	-1.54495	-0.362
ILMN_1827549	0.3462	0.00247	3.167	-1.57306	0.0651
ILMN_1799120	0.3478	0.0025	-3.16298	-1.58316	-0.366
ILMN_1804223	0.3478	0.0025	3.16234	-1.58476	0.0669
ILMN_1721802	0.348	0.00252	3.1603	-1.58989	0.0716
ILMN_1704985	0.3941	0.00467	-2.94427	-2.11895	-0.702	CYP27A1	cytochrome P450 family 27 subfamily A member 1
ILMN_1841957	0.3525	0.00262	3.14607	-1.62553	0.0977
ILMN_1882004	0.3525	0.00265	3.14206	-1.63556	0.064
ILMN_1681227	0.3525	0.00266	3.14189	-1.63598	0.0883
ILMN_1858289	0.3525	0.00267	3.14022	-1.64014	0.086
ILMN_1878109	0.3566	0.00288	-3.11416	-1.70506	-0.052
ILMN_1913729	0.3566	0.00299	3.10117	-1.73728	0.0578
ILMN_1788362	0.3566	0.00301	3.09915	-1.74229	0.06
ILMN_1825448	0.3566	0.00302	-3.09791	-1.74534	-0.0704
ILMN_1859524	0.3566	0.00306	3.09295	-1.75761	0.097
ILMN_1784653	0.3566	0.00306	-3.09269	-1.75827	-0.0618
ILMN_1706238	0.3566	0.00307	3.09191	-1.76018	0.37
ILMN_1899147	0.3566	0.00311	-3.08757	-1.77092	-0.0506
ILMN_1879228	0.3566	0.00312	3.08594	-1.77492	0.058
ILMN_1677200	0.4858	0.0144	-2.52333	-3.07027	-0.558	CYFIP2	cytoplasmic FMR1 interacting protein 2
ILMN_1833735	0.3566	0.00316	3.08135	-1.78624	0.0813
ILMN_1859888	0.357	0.00317	-3.08016	-1.78917	-0.0684
ILMN_1740380	0.3589	0.00326	-3.07118	-1.81131	-0.0531
ILMN_1684357	0.3589	0.00326	-3.07115	-1.81136	-0.132
ILMN_1729269	0.3626	0.00331	3.066	-1.82405	0.156
ILMN_1752451	0.4101	0.0062	-2.84179	-2.36057	-0.937	CTSH	cathepsin H
ILMN_1670872	0.3635	0.00336	3.06051	-1.83751	0.0565
ILMN_1856545	0.3637	0.00337	3.05956	-1.83985	0.0486
ILMN_1885058	0.3648	0.0034	3.05639	-1.84762	0.047
ILMN_1912145	0.366	0.00343	-3.05347	-1.85478	-0.0714
ILMN_2390853	0.4527	0.0101	-2.65929	-2.77512	-0.694	CTSH	cathepsin H
ILMN_1777058	0.3692	0.00362	3.0347	-1.90066	0.318
ILMN_1842917	0.3692	0.00367	3.02918	-1.91412	0.0627
ILMN_1841664	0.3692	0.00371	3.0258	-1.92237	0.0658
ILMN_2115125	0.4891	0.0151	-2.50607	-3.10688	-0.528	CTGF	connective tissue growth factor
ILMN_1662103	0.3762	0.00395	-3.0035	-1.97651	-0.0631
ILMN_1883410	0.3798	0.00404	2.99576	-1.99524	0.065
ILMN_1878922	0.3827	0.00415	2.98584	-2.01919	0.0484
ILMN_1713838	0.3827	0.00417	2.98482	-2.02164	0.0545
ILMN_1701289	0.383	0.00422	2.98013	-2.03294	0.217
ILMN_2090040	0.383	0.00435	-2.96983	-2.05772	-0.319
ILMN_1822484	0.383	0.00435	2.96978	-2.05785	0.059
ILMN_1704241	0.383	0.00436	2.96843	-2.0611	0.049
ILMN_1776842	0.3923	0.00451	2.95653	-2.08963	0.159
ILMN_1896550	0.3939	0.00464	2.94612	-2.11453	0.0624
ILMN_1672742	0.3939	0.00465	2.94566	-2.11562	0.0589
ILMN_1783204	0.3941	0.00468	-2.94373	-2.12023	-0.0756
ILMN_1916183	0.3957	0.0047	2.94174	-2.125	0.0594
ILMN_1857031	0.3959	0.00472	2.94043	-2.12811	0.0565
ILMN_2163315	0.3959	0.00475	2.9379	-2.13416	0.0756
ILMN_1886789	0.3959	0.00477	2.93685	-2.13666	0.0519
ILMN_1877366	0.3959	0.00478	2.93588	-2.13895	0.0511
ILMN_1775851	0.396	0.00489	2.92802	-2.15767	0.0633
ILMN_2371280	0.5142	0.0186	-2.42272	-3.28085	-0.762	CSF3R	colony stimulating factor 3 receptor
ILMN_1657286	0.3967	0.00491	-2.92634	-2.16168	-0.0549
ILMN_1659365	0.3982	0.00501	2.91886	-2.17943	0.439
ILMN_1728999	0.3982	0.00505	-2.91637	-2.18535	-0.172
ILMN_1708047	0.3982	0.00519	2.90618	-2.20947	0.377
ILMN_1841468	0.3982	0.0052	-2.90562	-2.2108	-0.0655
ILMN_1703229	0.3982	0.00521	2.90506	-2.21212	0.255
ILMN_1868623	0.3982	0.00522	2.90418	-2.21421	0.055
ILMN_1725702	0.3982	0.00525	-2.90249	-2.21821	-0.0588
ILMN_1905008	0.3982	0.00527	2.90068	-2.22248	0.0587
ILMN_1867696	0.3982	0.00529	2.89956	-2.22514	0.0519
ILMN_1651536	0.3982	0.00533	-2.89687	-2.23149	-0.0659
ILMN_1879577	0.3982	0.00541	-2.89159	-2.24393	-0.0589
ILMN_1665515	0.3982	0.00544	2.8897	-2.24839	0.0673
ILMN_1688126	0.3982	0.00545	-2.88898	-2.25009	-0.472
ILMN_1914691	0.3999	0.00551	2.88499	-2.25948	0.0507
ILMN_1895029	0.4056	0.00569	2.8734	-2.2867	0.0474
ILMN_1691787	0.4062	0.00572	2.87156	-2.29103	0.158
ILMN_1908640	0.4062	0.00574	-2.87019	-2.29423	-0.0496
ILMN_1672389	0.564	0.028	-2.25501	-3.61648	-0.611	CRYZ	crystallin zeta
ILMN_1651380	0.4062	0.00581	2.86587	-2.30436	0.0472
ILMN_1904809	0.4062	0.00582	-2.86513	-2.30609	-0.0535
ILMN_1897094	0.4062	0.00587	2.86162	-2.31431	0.0557
ILMN_1774674	0.4065	0.00591	-2.85969	-2.31882	-0.0569
ILMN_1806813	0.408	0.00597	2.85568	-2.3282	0.0569
ILMN_1855682	0.408	0.00598	2.85492	-2.32997	0.0789
ILMN_1778543	0.408	0.00601	2.85324	-2.3339	0.233
ILMN_1912695	0.408	0.00602	-2.85257	-2.33544	-0.0581
ILMN_1811858	0.4081	0.00605	2.8506	-2.34004	0.0677
ILMN_1873389	0.4101	0.00617	2.84398	-2.35549	0.0578
ILMN_1908842	0.4101	0.00618	2.84335	-2.35694	0.0587
ILMN_1744806	0.5579	0.0271	-2.26872	-3.58978	-0.54	CPB2	carboxypeptidase B2
ILMN_1704789	0.4119	0.00633	2.83463	-2.37722	0.0599
ILMN_1774480	0.4122	0.00635	2.83315	-2.38067	0.0836
ILMN_1685097	0.4131	0.00638	2.83142	-2.38467	0.388
ILMN_1829068	0.4145	0.00646	2.82709	-2.39473	0.0508
ILMN_1717733	0.416	0.00656	2.82113	-2.40854	0.0483
ILMN_1671442	0.4162	0.0066	2.81896	-2.41354	0.249
ILMN_1874815	0.4162	0.00662	-2.81814	-2.41544	-0.194
ILMN_1911207	0.4166	0.00664	2.81673	-2.4187	0.0628
ILMN_1671510	0.4166	0.00669	2.81426	-2.42441	0.0531
ILMN_1890000	0.4166	0.00675	2.8109	-2.43218	0.0885
ILMN_1876404	0.4166	0.00676	2.81018	-2.43384	0.0516
ILMN_1720024	0.4166	0.00678	-2.80919	-2.43612	-0.142
ILMN_1704029	0.4168	0.0068	2.80827	-2.43825	0.0455
ILMN_1706612	0.4177	0.00683	-2.80632	-2.44275	-0.393
ILMN_1904486	0.4177	0.00684	2.80597	-2.44356	0.0438
ILMN_1789507	0.5834	0.0343	2.16877	-3.78135	0.857	COL11A1	collagen type XI alpha 1 chain
ILMN_1671856	0.4236	0.00711	2.79168	-2.47645	0.0488
ILMN_2207393	0.2698	0.000584	3.64163	-0.32359	0.504	CNOT3	CCR4-NOT transcription complex subunit 3
ILMN_1916434	0.4246	0.00727	2.78354	-2.49512	0.0465
ILMN_1664307	0.4246	0.00727	-2.78352	-2.49517	-0.0535
ILMN_1656900	0.4246	0.0073	-2.78199	-2.49866	-0.448
ILMN_1773222	0.4246	0.00738	-2.77811	-2.50755	-0.089
ILMN_1861461	0.4246	0.00742	2.77583	-2.51278	0.0516
ILMN_1826057	0.4246	0.00748	2.77288	-2.51952	0.0688
ILMN_1871235	0.4246	0.00756	2.76909	-2.52817	0.0516
ILMN_1712784	0.4246	0.00758	2.76803	-2.53061	0.0638
ILMN_1844834	0.4248	0.00761	2.76678	-2.53344	0.0552
ILMN_1660964	0.4295	0.00785	2.75512	-2.56002	0.054
ILMN_1691217	0.4295	0.00786	-2.75475	-2.56086	-0.0641
ILMN_1664231	0.4311	0.00796	2.74977	-2.57217	0.407
ILMN_1820628	0.4329	0.00805	2.74601	-2.5807	0.0502
ILMN_2336133	0.437	0.00824	-2.7372	-2.60067	-0.345
ILMN_1890463	0.437	0.00825	2.73678	-2.60162	0.0423
ILMN_1824982	0.437	0.00826	-2.73621	-2.60292	-0.0426
ILMN_1909681	0.437	0.00832	2.73366	-2.60867	0.0572
ILMN_1897224	0.437	0.00835	-2.73225	-2.61186	-0.0489
ILMN_1867076	0.437	0.00838	-2.73099	-2.61471	-0.045
ILMN_1699340	0.4376	0.00843	2.72863	-2.62005	0.0562
ILMN_1846462	0.4393	0.00854	-2.72363	-2.63134	-0.0597
ILMN_1915608	0.4394	0.00855	2.72311	-2.63251	0.101
ILMN_1770896	0.44	0.0086	2.72136	-2.63646	0.0507
ILMN_1655365	0.44	0.00864	-2.71923	-2.64125	-0.0928
ILMN_1807393	0.44	0.00871	2.71646	-2.64748	0.0535
ILMN_1731123	0.44	0.00873	2.7157	-2.64921	0.0897
ILMN_1899407	0.44	0.00876	-2.71417	-2.65263	-0.406
ILMN_1916254	0.44	0.0088	-2.71243	-2.65654	-0.046
ILMN_1700076	0.44	0.00881	2.71211	-2.65727	0.0597
ILMN_1687724	0.44	0.00882	2.71147	-2.65871	0.154
ILMN_1834456	0.44	0.00888	2.70907	-2.6641	0.0521
ILMN_1819071	0.44	0.00891	2.70768	-2.66722	0.0547
ILMN_1707689	0.4401	0.00895	2.70607	-2.67084	0.194
ILMN_1797942	0.4401	0.00897	-2.70522	-2.67274	-0.0499
ILMN_1699253	0.4401	0.00899	2.70459	-2.67415	0.384
ILMN_1699665	0.4246	0.00742	-2.77581	-2.51282	-1.09	CLIC6	chloride intracellular channel 6
ILMN_1815313	0.4414	0.00912	2.69913	-2.68639	0.206
ILMN_1684704	0.4417	0.00922	-2.69496	-2.69574	-0.0768
ILMN_1679280	0.4425	0.00926	2.69337	-2.69929	0.477
ILMN_1878811	0.4433	0.00932	2.69085	-2.70491	0.0582
ILMN_1697665	0.4436	0.00936	2.68932	-2.70834	0.272
ILMN_1735176	0.4436	0.00936	-2.68922	-2.70856	-0.0484
ILMN_1852842	0.4442	0.00942	-2.68685	-2.71384	-0.0525
ILMN_1911667	0.4442	0.00943	2.68669	-2.71421	0.054
ILMN_1657442	0.4442	0.00943	2.68639	-2.71487	0.0741
ILMN_1843080	0.4445	0.00947	2.68482	-2.71839	0.0509
ILMN_1907241	0.4449	0.0095	2.68376	-2.72074	0.0509
ILMN_1690320	0.4449	0.00952	-2.68306	-2.72231	-0.328
ILMN_2353110	0.4459	0.0096	-2.67973	-2.72973	-0.047
ILMN_1904836	0.4463	0.00963	2.67867	-2.7321	0.0497
ILMN_1825996	0.4473	0.00966	-2.67747	-2.73476	-0.0518
ILMN_1916717	0.4475	0.00973	2.67472	-2.74089	0.0518
ILMN_1830913	0.4475	0.00977	-2.6733	-2.74404	-0.035
ILMN_1882394	0.4486	0.00982	2.67138	-2.74831	0.047
ILMN_1748607	0.4492	0.00986	2.66982	-2.75178	0.0762
ILMN_1769592	0.4498	0.00991	2.66796	-2.75591	0.0711
ILMN_1772292	0.4512	0.00995	2.66631	-2.75956	0.155
ILMN_2374633	0.4519	0.00998	2.66498	-2.76253	0.317
ILMN_2094776	0.4525	0.0101	-2.66246	-2.76811	-0.351	CCNL1	cyclin L1
ILMN_1769013	0.4527	0.0101	-2.6618	-2.76956	-0.32	ASGR1	asialoglycoprotein receptor 1
ILMN_1789732	0.4527	0.0101	2.66125	-2.77078	0.176	TMEM189	transmembrane protein 189
ILMN_1668743	0.4527	0.0101	-2.66077	-2.77185	-0.319	RILPL2	Rab interacting lysosomal protein like 2
ILMN_1655482	0.4527	0.0101	2.66075	-2.7719	0.246	TRIM27	tripartite motif containing 27
ILMN_1656182	0.4527	0.0101	-2.66042	-2.77262	-0.0685
ILMN_1658405	0.4527	0.0101	2.65951	-2.77463	0.0456
ILMN_2142185	0.3541	0.00277	-3.12758	-1.67167	-0.582	CLEC14A	C-type lectin domain family 14 member A
ILMN_1762678	0.4527	0.0101	-2.65928	-2.77516	-0.397	NMT1	N-myristoyltransferase 1
ILMN_1795703	0.4527	0.0101	2.65897	-2.77584	0.209	GET4	golgi to ER traffic protein 4
ILMN_2072568	0.3635	0.00335	3.06131	-1.83556	0.685	CLDN8	claudin 8
ILMN_1788213	0.4527	0.0102	2.65812	-2.77772	0.404	FRAT2	frequently rearranged in advanced T-cell lymphomas 2
ILMN_1670844	0.4527	0.0102	2.65782	-2.77839	0.241	OPN3	opsin 3
ILMN_1729237	0.4527	0.0102	-2.65718	-2.77979	-0.472	CYB5R1	cytochrome b5 reductase 1
ILMN_1669722	0.4527	0.0102	2.65707	-2.78004	0.193	LRRC61	leucine rich repeat containing 61
ILMN_2396571	0.4527	0.0102	-2.65705	-2.78009	-0.269	GPR108	G protein-coupled receptor 108
ILMN_1782504	0.4539	0.0102	2.65569	-2.7831	0.329	MTERF3	mitochondrial transcription termination factor 3
ILMN_1746408	0.4541	0.0103	-2.65489	-2.78487	-0.294	MIDN	midnolin
ILMN_1849877	0.4541	0.0103	-2.65487	-2.78492	-0.0504
ILMN_1725338	0.5834	0.0343	-2.16883	-3.78124	-0.566	CLDN23	claudin 23
ILMN_1823282	0.4553	0.0103	2.65313	-2.78876	0.0558
ILMN_1801313	0.456	0.0103	2.65201	-2.79124	0.252	SIAH2	siah E3 ubiquitin protein ligase 2
ILMN_1864939	0.456	0.0103	-2.65153	-2.79229	-0.0414	LOC100505625	uncharacterized LOC100505625
ILMN_1746676	0.456	0.0104	2.65118	-2.79306	0.372	CLDN8	claudin 8
ILMN_1915012	0.456	0.0104	-2.65092	-2.79365	-0.0551
ILMN_1696284	0.3703	0.00381	-3.01674	-1.94439	-1.71	CLDN18	claudin 18
ILMN_1891021	0.456	0.0104	-2.65026	-2.7951	-0.0519
ILMN_1706478	0.456	0.0104	2.65016	-2.79531	0.0713	HOXA7	homeobox A7
ILMN_1701464	0.4564	0.0104	-2.64947	-2.79684	-0.125	ZNF776	zinc finger protein 776
ILMN_1748792	0.4564	0.0104	2.64918	-2.79748	0.0498	SCN5A	sodium voltage-gated channel alpha subunit 5
ILMN_1744711	0.4567	0.0104	2.64856	-2.79885	0.0678
ILMN_1654385	0.4577	0.0105	2.64691	-2.80249	0.244	ASB13	ankyrin repeat and SOCS box containing 13
ILMN_1794505	0.4577	0.0105	2.64676	-2.80284	0.332	SHFM1	split hand/foot malformation (ectrodactyly) type 1
ILMN_1883364	0.4577	0.0105	-2.6467	-2.80296	-0.0561
ILMN_2389970	0.4578	0.0105	-2.6463	-2.80384	-0.152
ILMN_1698715	0.4579	0.0105	2.64589	-2.80474	0.228	NHLRC2	NHL repeat containing 2
ILMN_1796288	0.4582	0.0105	2.64531	-2.80603	0.137	COL5A3	collagen type V alpha 3 chain
ILMN_1713759	0.4582	0.0105	-2.6447	-2.80738	-0.305	UBE2J1	ubiquitin conjugating enzyme E2 J1
ILMN_2326282	0.4582	0.0105	-2.64455	-2.8077	-0.318	TMEM259	transmembrane protein 259
ILMN_2408938	0.4583	0.0106	2.64376	-2.80943	0.407	LRRC20	leucine rich repeat containing 20
ILMN_1681269	0.4583	0.0106	-2.6433	-2.81045	-0.366	DYRK4	dual specificity tyrosine phosphorylation regulated kinase 4
ILMN_2072296	0.3432	0.00186	3.26394	-1.32703	0.717	CKS2	CDC28 protein kinase regulatory subunit 2
ILMN_1867964	0.4583	0.0106	-2.64222	-2.81283	-0.0643
ILMN_1796210	0.4583	0.0106	2.64201	-2.8133	0.241	PPRC1	peroxisome proliferator-activated receptor gamma, coactivator-related 1
ILMN_1757627	0.4583	0.0106	2.6418	-2.81376	0.278	ZMYND19	zinc finger MYND-type containing 19
ILMN_1756326	0.4119	0.00631	2.83561	-2.37495	0.642	CKS2	CDC28 protein kinase regulatory subunit 2
ILMN_1758941	0.4583	0.0106	-2.64145	-2.81454	-0.413	REEP5	receptor accessory protein 5
ILMN_2159471	0.4583	0.0106	2.64125	-2.81498	0.0663	GEMIN8P4	gem nuclear organelle associated protein 8 pseudogene 4
ILMN_1719256	0.3366	0.00153	3.32798	-1.1618	0.717	CKS1B	CDC28 protein kinase regulatory subunit 1B
ILMN_2259292	0.4599	0.0107	2.63929	-2.81929	0.103	CCZ1	CCZ1 homolog, vacuolar protein trafficking and biogenesis associated
ILMN_1780306	0.4599	0.0107	2.63904	-2.81985	0.051	DDHD1	DDHD domain containing 1
ILMN_1748272	0.4599	0.0107	-2.63871	-2.82058	-0.0519
ILMN_2041046	0.3432	0.00223	3.20201	-1.48478	0.605	CKS1B	CDC28 protein kinase regulatory subunit 1B
ILMN_1856263	0.4599	0.0107	2.63814	-2.82182	0.0809
ILMN_1912805	0.4611	0.0108	-2.63661	-2.8252	-0.0511
ILMN_2225254	0.4611	0.0108	2.6363	-2.82586	0.094	ZNF740	zinc finger protein 740
ILMN_1798177	0.5142	0.0191	2.412	-3.30289	0.523	CHURC1	churchill domain containing 1
ILMN_2375386	0.4611	0.0108	2.63576	-2.82706	0.193	RNPS1	RNA binding protein with serine rich domain 1
ILMN_2176592	0.4612	0.0108	-2.63463	-2.82954	-0.295	BCHE	butyrylcholinesterase
ILMN_1802819	0.4612	0.0108	2.63453	-2.82976	0.159	DEPDC1	DEP domain containing 1
ILMN_1730229	0.2698	0.000432	-3.73622	-0.06191	-0.737	CGNL1	cingulin like 1
ILMN_1727815	0.2998	0.000711	-3.57857	-0.49582	-0.685	CFI	complement factor I
ILMN_1777444	0.4612	0.0108	2.6337	-2.8316	0.192	STX5	syntaxin 5
ILMN_1796180	0.4612	0.0108	-2.63367	-2.83166	-0.407	CRY2	cryptochrome circadian clock 2
ILMN_1768293	0.4626	0.0109	2.63218	-2.83493	0.445	NUP155	nucleoporin 155
ILMN_2112301	0.4629	0.0109	2.63139	-2.83667	0.36	DRAP1	DR1 associated protein 1
ILMN_1713688	0.4629	0.0109	-2.63081	-2.83795	-0.355	DHX32	DEAH-box helicase 32 (putative)
ILMN_1727055	0.4629	0.0109	2.63013	-2.83944	0.291	PARPBP	PARP1 binding protein
ILMN_1657803	0.3765	0.00397	-3.00225	-1.97953	-0.707	CFH	complement factor H
ILMN_2246510	0.4629	0.0109	-2.62993	-2.83987	-0.341	TSC1	tuberous sclerosis 1
ILMN_1791217	0.4629	0.011	-2.62957	-2.84067	-0.202	STRIP1	striatin interacting protein 1
ILMN_1691953	0.4629	0.011	2.62908	-2.84175	0.0528	SPANXN3	SPANX family member N3
ILMN_1777190	0.308	0.000966	-3.47962	-0.7624	-0.899	CFD	complement factor D
ILMN_1817671	0.4629	0.011	2.6283	-2.84345	0.0464	LOC101927549	uncharacterized LOC101927549
ILMN_1766435	0.4629	0.011	2.62819	-2.8437	0.337	WBP11	WW domain binding protein 11
ILMN_1747016	0.3161	0.00106	3.44815	-0.84621	0.541	CEP55	centrosomal protein 55
ILMN_1776173	0.4629	0.011	2.6277	-2.84477	0.38	PSMD7	proteasome 26S subunit, non-ATPase 7
ILMN_2380418	0.4629	0.011	2.62749	-2.84522	0.307	BICD2	BICD cargo adaptor 2
ILMN_2413899	0.4629	0.011	2.6272	-2.84588	0.144	MCM10	minichromosome maintenance 10 replication initiation factor
ILMN_1720526	0.3432	0.00238	3.17913	-1.54255	0.509	CENPN	centromere protein N
ILMN_2339796	0.4629	0.0111	-2.62621	-2.84803	-0.283	CDC16	cell division cycle 16
ILMN_2323048	0.4629	0.0111	-2.62617	-2.84812	-0.275	ERP29	endoplasmic reticulum protein 29
ILMN_1708147	0.4629	0.0111	2.62606	-2.84836	0.263	TBPL1	TATA-box binding protein like 1
ILMN_2116605	0.463	0.0111	2.62504	-2.85061	0.0489	COL19A1	collagen type XIX alpha 1 chain
ILMN_1869439	0.463	0.0111	-2.62453	-2.85172	-0.0559
ILMN_1658158	0.463	0.0111	2.62446	-2.85188	0.0543	ZNF501	zinc finger protein 501
ILMN_1668814	0.2451	0.00016	4.04082	0.80592	0.554	CENPM	centromere protein M
ILMN_1862046	0.463	0.0111	2.62431	-2.85221	0.0466
ILMN_2247572	0.4635	0.0111	2.62358	-2.8538	0.443	SSX1	SSX family member 1
ILMN_1873464	0.4636	0.0111	2.62319	-2.85466	0.0444
ILMN_1737681	0.4643	0.0112	-2.62229	-2.85663	-0.0611	NEK10	NIMA related kinase 10
ILMN_1731749	0.4646	0.0112	2.62169	-2.85795	0.0584
ILMN_1692620	0.4647	0.0112	-2.62131	-2.85877	-0.279	ZNF263	zinc finger protein 263
ILMN_1764769	0.4647	0.0112	-2.62081	-2.85987	-0.284	VWA5A	von Willebrand factor A domain containing 5A
ILMN_1712026	0.4647	0.0112	-2.62066	-2.86021	-0.313	NLRP3	NLR family pyrin domain containing 3
ILMN_1686370	0.465	0.0112	-2.61955	-2.86264	-0.114	PHYKPL	5-phosphohydroxy-L-lysine phospho-lyase
ILMN_1822971	0.465	0.0112	-2.61951	-2.86273	-0.116
ILMN_1771903	0.465	0.0113	2.61942	-2.86293	0.385	NUP37	nucleoporin 37
ILMN_2365711	0.4662	0.0113	-2.61735	-2.86745	-0.334	2019-09-02	septin 2
ILMN_1821120	0.4662	0.0113	2.61718	-2.86782	0.0498
ILMN_2368718	0.3432	0.00203	3.23282	-1.40655	0.606	CENPM	centromere protein M
ILMN_1683824	0.4662	0.0113	2.6171	-2.86799	0.202	ANO7	anoctamin 7
ILMN_1795811	0.4668	0.0114	-2.61559	-2.87131	-0.0679	ASB2	ankyrin repeat and SOCS box containing 2
ILMN_1851497	0.4668	0.0114	2.6154	-2.87172	0.038
ILMN_1692664	0.4668	0.0114	2.61531	-2.87191	0.333	PRR5	proline rich 5
ILMN_1820906	0.4668	0.0114	-2.61487	-2.87288	-0.0617
ILMN_2363489	0.4668	0.0114	2.61421	-2.87431	0.341	BRE	brain and reproductive organ-expressed (TNFRSF1A modulator)
ILMN_1661170	0.4668	0.0114	2.61412	-2.8745	0.208	NDUFB8	NADH:ubiquinone oxidoreductase subunit B8
ILMN_2329834	0.4668	0.0114	2.61333	-2.87623	0.283	RBM12	RNA binding motif protein 12
ILMN_1675936	0.4668	0.0114	-2.61304	-2.87687	-0.363	HIGD1B	HIG1 hypoxia inducible domain family member 1B
ILMN_1815500	0.4668	0.0115	-2.61255	-2.87795	-0.455	ITPR3	inositol 1,4,5-trisphosphate receptor type 3
ILMN_1891583	0.4668	0.0115	-2.61235	-2.87839	-0.0471
ILMN_1693039	0.4668	0.0115	2.61228	-2.87853	0.212	ZFPL1	zinc finger protein like 1
ILMN_1676099	0.4668	0.0115	-2.61206	-2.87902	-0.268	SPON2	spondin 2
ILMN_1861742	0.4668	0.0115	-2.61092	-2.8815	-0.0577
ILMN_2121389	0.4668	0.0115	2.61078	-2.88181	0.06	ACOT1	acyl-CoA thioesterase 1
ILMN_2375319	0.4668	0.0115	-2.61058	-2.88224	-0.222
ILMN_1801491	0.4668	0.0115	-2.61038	-2.88268	-0.143	SLC26A2	solute carrier family 26 member 2
ILMN_1798172	0.4668	0.0115	2.61022	-2.88304	0.315	IPO4	importin 4
ILMN_1788629	0.4668	0.0115	2.60995	-2.88361	0.101
ILMN_1664516	0.3984	0.00546	2.88796	-2.25249	0.58	CENPF	centromere protein F
ILMN_1785486	0.4668	0.0115	2.60966	-2.88426	0.0545	ERG	ERG, ETS transcription factor
ILMN_1753063	0.4668	0.0115	2.60959	-2.88441	0.324	KIF15	kinesin family member 15
ILMN_1662091	0.4668	0.0116	2.6094	-2.88482	0.0663	MROH5	maestro heat like repeat family member 5
ILMN_1714515	0.4668	0.0116	2.60925	-2.88516	0.392	MRPS12	mitochondrial ribosomal protein S12
ILMN_1870717	0.4668	0.0116	2.6088	-2.88613	0.0581	LINC01165	long intergenic non-protein coding RNA 1165
ILMN_1804568	0.4668	0.0116	2.60833	-2.88715	0.11	HOMER1	homer scaffolding protein 1
ILMN_1801257	0.2698	0.00058	3.64367	-0.31798	0.55	CENPA	centromere protein A
ILMN_1683596	0.4668	0.0116	2.60774	-2.88844	0.0568
ILMN_2120340	0.4668	0.0116	2.60693	-2.89021	0.322	RUVBL2	RuvB like AAA ATPase 2
ILMN_1677018	0.4668	0.0116	2.60674	-2.89063	0.227	HOXA4	homeobox A4
ILMN_1680430	0.4668	0.0116	-2.6066	-2.89093	-0.0811	TSGA10	testis specific 10
ILMN_2204826	0.4668	0.0116	-2.60653	-2.89108	-0.0533	SEPP1	selenoprotein P, plasma, 1
ILMN_1899936	0.4668	0.0116	2.60637	-2.89143	0.0507	TMEM99	transmembrane protein 99
ILMN_1669062	0.4668	0.0117	-2.60595	-2.89234	-0.0911
ILMN_1725414	0.4668	0.0117	-2.60533	-2.89371	-0.12	ABCC6	ATP binding cassette subfamily C member 6
ILMN_1710676	0.4668	0.0117	2.60497	-2.89448	0.306	FBXO5	F-box protein 5
ILMN_1874172	0.4668	0.0117	-2.6048	-2.89486	-0.0782
ILMN_1746618	0.4668	0.0117	-2.60479	-2.89487	-0.386	PAQR7	progestin and adipoQ receptor family member 7
ILMN_1785179	0.4681	0.0117	-2.60342	-2.89786	-0.487	UBE2G2	ubiquitin conjugating enzyme E2 G2
ILMN_1653018	0.4681	0.0117	2.60292	-2.89896	0.0489	TMEM232	transmembrane protein 232
ILMN_2387636	0.4681	0.0118	2.60256	-2.89973	0.298
ILMN_1722292	0.4681	0.0118	2.6025	-2.89987	0.326	AVL9	AVL9 cell migration associated
ILMN_1791436	0.4688	0.0118	-2.6016	-2.90183	-0.0804	EZH1	enhancer of zeste 1 polycomb repressive complex 2 subunit
ILMN_2407669	0.4689	0.0118	-2.6012	-2.90269	-0.122	PEAR1	platelet endothelial aggregation receptor 1
ILMN_1866152	0.4695	0.0118	2.60013	-2.90503	0.067
ILMN_1690442	0.4695	0.0118	2.6	-2.90532	0.459	TMEM241	transmembrane protein 241
ILMN_1659976	0.4695	0.0119	2.5994	-2.90662	0.189	CLP1	cleavage and polyadenylation factor I subunit 1
ILMN_2043816	0.4695	0.0119	2.59907	-2.90734	0.279	ARPC5L	actin related protein 2/3 complex subunit 5 like
ILMN_1783712	0.4695	0.0119	2.59893	-2.90764	0.211	KNOP1	lysine rich nucleolar protein 1
ILMN_2359306	0.4695	0.0119	-2.59887	-2.90776	-0.322	CAPSL	calcyphosine like
ILMN_1745119	0.4695	0.0119	2.59852	-2.90854	0.345	MPLKIP	M-phase specific PLK1 interacting protein
ILMN_1654721	0.4712	0.0119	2.59689	-2.91209	0.0442
ILMN_1809612	0.4712	0.0119	2.59656	-2.9128	0.0788	SSMEM1	serine rich single-pass membrane protein 1
ILMN_1863253	0.4725	0.012	2.59518	-2.91579	0.0501
ILMN_1791211	0.4727	0.012	-2.59462	-2.91701	-0.23	DOK2	docking protein 2
ILMN_1875578	0.4727	0.012	2.59436	-2.91758	0.0468
ILMN_1778381	0.4734	0.012	2.59315	-2.9202	0.259
ILMN_2408851	0.4734	0.0121	-2.59272	-2.92114	-0.326	ARHGAP30	Rho GTPase activating protein 30
ILMN_2262901	0.4734	0.0121	-2.59245	-2.92172	-0.307	RUFY3	RUN and FYVE domain containing 3
ILMN_2083333	0.4734	0.0121	2.59197	-2.92276	0.24
ILMN_1742935	0.4734	0.0121	-2.59162	-2.92352	-0.319	ZNF33B	zinc finger protein 33B
ILMN_2131936	0.4734	0.0121	2.59159	-2.92359	0.0731	ATAD3B	ATPase family, AAA domain containing 3B
ILMN_1704812	0.4734	0.0121	2.59126	-2.92431	0.0653
ILMN_1712522	0.4246	0.00758	-2.76815	-2.53032	-0.978	CEACAM6	carcinoembryonic antigen related cell adhesion molecule 6
ILMN_1748473	0.4734	0.0121	-2.5906	-2.92574	-0.488	GIMAP4	GTPase, IMAP family member 4
ILMN_2160929	0.4734	0.0121	2.59052	-2.92593	0.478	FEN1	flap structure-specific endonuclease 1
ILMN_2062754	0.4734	0.0121	-2.5902	-2.92661	-0.218	SRA1	steroid receptor RNA activator 1
ILMN_1754051	0.4734	0.0121	2.59009	-2.92685	0.25	RMI1	RecQ mediated genome instability 1
ILMN_2331010	0.4735	0.0122	-2.58954	-2.92804	-0.133	TNFRSF10B	TNF receptor superfamily member 10b
ILMN_1700888	0.4735	0.0122	2.58936	-2.92843	0.105	ENPP1	ectonucleotide pyrophosphatase/phosphodiesterase 1
ILMN_2154287	0.4735	0.0122	-2.58908	-2.92904	-0.313	ACCS	1-aminocyclopropane-1-carboxylate synthase homolog (inactive)
ILMN_1714700	0.4738	0.0122	-2.58854	-2.93021	-0.445	TRIB2	tribbles pseudokinase 2
ILMN_1716815	0.4817	0.0129	-2.56823	-2.97413	-0.721	CEACAM1	carcinoembryonic antigen related cell adhesion molecule 1
ILMN_1699648	0.4749	0.0123	-2.58651	-2.93462	-0.0704	ZNF516	zinc finger protein 516
ILMN_1738249	0.4749	0.0123	2.58646	-2.93472	0.0631
ILMN_1812226	0.4749	0.0123	-2.5864	-2.93485	-0.294	ICAM1	intercellular adhesion molecule 1
ILMN_1716006	0.4749	0.0123	2.58609	-2.93552	0.091	C18orf54	chromosome 18 open reading frame 54
ILMN_1849197	0.4749	0.0123	-2.58579	-2.93617	-0.039
ILMN_1692486	0.4763	0.0123	2.58416	-2.93972	0.25	ZNRD1	zinc ribbon domain containing 1
ILMN_1663493	0.4763	0.0123	2.58374	-2.94063	0.234	CCZ1B	CCZ1 homolog B, vacuolar protein trafficking and biogenesis associated
ILMN_1909093	0.4763	0.0124	-2.5835	-2.94113	-0.057
ILMN_2068274	0.4763	0.0124	-2.58343	-2.9413	-0.056	CLEC9A	C-type lectin domain family 9 member A
ILMN_1751081	0.4768	0.0124	2.58274	-2.94277	0.192	EHMT2	euchromatic histone lysine methyltransferase 2
ILMN_1684168	0.4771	0.0124	-2.58217	-2.94402	-0.0901
ILMN_1794374	0.4772	0.0124	2.58182	-2.94477	0.0575
ILMN_1676408	0.478	0.0124	-2.58084	-2.9469	-0.0827	TAGAP	T-cell activation RhoGTPase activating protein
ILMN_1730032	0.4782	0.0125	-2.58015	-2.94838	-0.452	BOK	BOK, BCL2 family apoptosis regulator
ILMN_1785570	0.4782	0.0125	-2.57975	-2.94925	-0.287	SUSD3	sushi domain containing 3
ILMN_1776850	0.4782	0.0125	2.57973	-2.94929	0.111
ILMN_2371724	0.5825	0.0336	-2.17668	-3.76645	-0.532	CEACAM1	carcinoembryonic antigen related cell adhesion molecule 1
ILMN_2332105	0.4787	0.0125	2.57839	-2.95219	0.422	WRNIP1	Werner helicase interacting protein 1
ILMN_1665795	0.4787	0.0125	2.57817	-2.95267	0.0562
ILMN_1871395	0.4787	0.0125	-2.57806	-2.95291	-0.0528
ILMN_1715318	0.4787	0.0125	-2.57787	-2.95331	-0.0791
ILMN_1790971	0.4787	0.0125	2.57756	-2.95399	0.173
ILMN_1800520	0.479	0.0126	2.57674	-2.95576	0.049	LOC401357	uncharacterized LOC401357
ILMN_1769734	0.479	0.0126	2.57646	-2.95637	0.384	NT5C3A	5'-nucleotidase, cytosolic IIIA
ILMN_1766038	0.479	0.0126	-2.57625	-2.95682	-0.318	C11orf88	chromosome 11 open reading frame 88
ILMN_1740597	0.479	0.0126	2.57608	-2.95719	0.0591	CDKN2D	cyclin dependent kinase inhibitor 2D
ILMN_1781614	0.4801	0.0126	-2.5747	-2.96016	-0.0497	GAS6	growth arrest specific 6
ILMN_1731928	0.4801	0.0126	-2.57437	-2.96089	-0.144	LY9	lymphocyte antigen 9
ILMN_2043265	0.4801	0.0127	-2.57432	-2.96099	-0.333	ZNF106	zinc finger protein 106
ILMN_1712308	0.4804	0.0127	2.57378	-2.96216	0.0665	FSTL4	follistatin like 4
ILMN_1692368	0.4808	0.0127	2.57317	-2.96348	0.0547	DLX2	distal-less homeobox 2
ILMN_1806109	0.4809	0.0127	-2.57239	-2.96517	-0.0445
ILMN_1792088	0.4809	0.0127	2.57208	-2.96582	0.0932	C1orf101	chromosome 1 open reading frame 101
ILMN_1782579	0.4809	0.0127	2.57203	-2.96593	0.293	IMMT	inner membrane mitochondrial protein
ILMN_1746349	0.4809	0.0127	2.57183	-2.96636	0.0696	TSPAN19	tetraspanin 19
ILMN_1651237	0.2698	0.000528	3.67331	-0.23639	0.625	CDT1	chromatin licensing and DNA replication factor 1
ILMN_1778677	0.4809	0.0128	2.57086	-2.96847	0.25	MRS2	MRS2, magnesium transporter
ILMN_1749612	0.4809	0.0128	2.57075	-2.96871	0.256	IMMP1L	inner mitochondrial membrane peptidase subunit 1
ILMN_1727709	0.4809	0.0128	-2.57072	-2.96877	-0.12	GPBAR1	G protein-coupled bile acid receptor 1
ILMN_1897891	0.4814	0.0128	-2.56996	-2.97041	-0.0489
ILMN_1700985	0.4817	0.0128	-2.56943	-2.97154	-0.0533	PRDM5	PR/SET domain 5
ILMN_1907206	0.4817	0.0128	2.56885	-2.9728	0.0574
ILMN_1871316	0.4817	0.0128	-2.56863	-2.97327	-0.06
ILMN_1695263	0.4817	0.0128	2.56854	-2.97348	0.0375	SH2D5	SH2 domain containing 5
ILMN_1666305	0.2698	0.000343	3.80842	0.1404	0.58	CDKN3	cyclin dependent kinase inhibitor 3
ILMN_1718219	0.4817	0.0129	-2.56795	-2.97474	-0.0582	OR13H1	olfactory receptor family 13 subfamily H member 1
ILMN_1784602	0.2998	0.0007	-3.58357	-0.48223	-0.753	CDKN1A	cyclin dependent kinase inhibitor 1A
ILMN_2337492	0.4819	0.0129	2.56723	-2.9763	0.247	RCE1	Ras converting CAAX endopeptidase 1
ILMN_1797209	0.4819	0.0129	2.56643	-2.97802	0.25	CEP41	centrosomal protein 41
ILMN_1770084	0.4819	0.0129	-2.56641	-2.97805	-0.469	TACC1	transforming acidic coiled-coil containing protein 1
ILMN_1741148	0.4819	0.0129	2.5661	-2.97873	0.375	ALDOA	aldolase, fructose-bisphosphate A
ILMN_2294431	0.4819	0.0129	2.56589	-2.97917	0.114	CDC25C	cell division cycle 25C
ILMN_1747911	0.0999	2.36e-05	4.60208	2.49168	0.746	CDK1	cyclin dependent kinase 1
ILMN_2415170	0.4819	0.0129	-2.5654	-2.98024	-0.133	VPS8	VPS8, CORVET complex subunit
ILMN_1891711	0.4819	0.013	2.56513	-2.98081	0.0704
ILMN_1723165	0.4826	0.013	2.56428	-2.98264	0.138
ILMN_1738009	0.4837	0.013	2.5625	-2.98649	0.0428
ILMN_1764314	0.4837	0.013	2.56234	-2.98682	0.336	FGD1	FYVE, RhoGEF and PH domain containing 1
ILMN_1695414	0.4837	0.0131	2.56144	-2.98875	0.465	ASF1B	anti-silencing function 1B histone chaperone
ILMN_1750792	0.4837	0.0131	2.56121	-2.98926	0.126	VAC14	Vac14, PIKFYVE complex component
ILMN_1854717	0.4837	0.0131	2.56067	-2.99041	0.0501
ILMN_1814600	0.4837	0.0131	2.56062	-2.99052	0.0877	DEPDC1B	DEP domain containing 1B
ILMN_1720595	0.4837	0.0131	2.56037	-2.99107	0.123	MDGA1	MAM domain containing glycosylphosphatidylinositol anchor 1
ILMN_1660186	0.4837	0.0131	-2.56015	-2.99152	-0.266	SYF2	SYF2 pre-mRNA splicing factor
ILMN_1827466	0.4837	0.0131	2.55978	-2.99234	0.0522
ILMN_1710629	0.4837	0.0131	2.55977	-2.99234	0.0413	CES5AP1	carboxylesterase 5A pseudogene 1
ILMN_1826921	0.4837	0.0131	-2.55968	-2.99256	-0.389	BLACAT1	bladder cancer associated transcript 1 (non-protein coding)
ILMN_1861045	0.4837	0.0131	-2.55945	-2.99303	-0.0502
ILMN_1802771	0.4837	0.0132	-2.55898	-2.99405	-0.176	C22orf15	chromosome 22 open reading frame 15
ILMN_1718866	0.4837	0.0132	2.55892	-2.99417	0.245	C5orf46	chromosome 5 open reading frame 46
ILMN_1692030	0.4837	0.0132	2.55885	-2.99434	0.0417
ILMN_1709891	0.4837	0.0132	2.5587	-2.99466	0.177
ILMN_1742607	0.4848	0.0132	2.55736	-2.99754	0.128
ILMN_1782006	0.4848	0.0132	-2.55724	-2.99778	-0.0584	NBPF3	neuroblastoma breakpoint family member 3
ILMN_1651557	0.4851	0.0132	2.55651	-2.99935	0.361	KDELC2	KDEL motif containing 2
ILMN_2131493	0.4851	0.0133	2.55631	-2.9998	0.229	MAVS	mitochondrial antiviral signaling protein
ILMN_1707304	0.4851	0.0133	2.55609	-3.00026	0.0651	KLF1	Kruppel like factor 1
ILMN_1801516	0.4853	0.0133	2.55561	-3.0013	0.413	GPC1	glypican 1
ILMN_1693276	0.4858	0.0133	-2.55473	-3.00318	-0.0555
ILMN_1709294	0.2867	0.000634	3.61511	-0.39625	0.563	CDCA8	cell division cycle associated 8
ILMN_1893550	0.4858	0.0133	2.55441	-3.00386	0.0597
ILMN_1667050	0.4858	0.0133	2.55358	-3.00565	0.336	PRPS1	phosphoribosyl pyrophosphate synthetase 1
ILMN_2399489	0.4858	0.0134	2.55329	-3.00627	0.0458	CBFB	core-binding factor beta subunit
ILMN_1655952	0.4858	0.0134	-2.55321	-3.00645	-0.467
ILMN_1849433	0.4858	0.0134	2.553	-3.0069	0.0667
ILMN_1683450	0.2698	0.000418	3.7469	-0.03214	0.877	CDCA5	cell division cycle associated 5
ILMN_1764362	0.4858	0.0134	2.55228	-3.00845	0.296	LYAR	Ly1 antibody reactive
ILMN_1694126	0.4858	0.0134	2.55222	-3.00858	0.221	KIF24	kinesin family member 24
ILMN_1679949	0.4858	0.0134	-2.55199	-3.00907	-0.364	SLC25A23	solute carrier family 25 member 23
ILMN_1684045	0.3007	0.00086	3.51756	-0.66072	0.531	CDCA4	cell division cycle associated 4
ILMN_1723171	0.4858	0.0135	2.55016	-3.01298	0.0457
ILMN_1737728	0.0452	3.31e-06	5.15207	4.22778	0.683	CDCA3	cell division cycle associated 3
ILMN_1893247	0.4858	0.0135	2.54915	-3.01515	0.0402
ILMN_1652342	0.4858	0.0135	-2.54913	-3.0152	-0.0577
ILMN_1668185	0.4858	0.0135	2.54884	-3.01582	0.243	ZNF282	zinc finger protein 282
ILMN_1712386	0.4858	0.0135	2.54874	-3.01604	0.186	MIS18A	MIS18 kinetochore protein A
ILMN_1761921	0.4858	0.0135	2.548	-3.01761	0.0698	IL12RB2	interleukin 12 receptor subunit beta 2
ILMN_2396991	0.4858	0.0136	-2.54755	-3.01857	-0.44	HCST	hematopoietic cell signal transducer
ILMN_1881340	0.4858	0.0136	2.54715	-3.01943	0.0539
ILMN_1778890	0.4858	0.0136	2.54669	-3.02042	0.193	LRR1	leucine rich repeat protein 1
ILMN_1895258	0.4858	0.0136	2.54634	-3.02118	0.0503
ILMN_2245305	0.4858	0.0136	2.54631	-3.02124	0.319	ABHD12	abhydrolase domain containing 12
ILMN_1715131	0.4858	0.0136	-2.54595	-3.02201	-0.477	CCR7	C-C motif chemokine receptor 7
ILMN_2069399	0.4858	0.0136	2.54587	-3.02218	0.0447	PGM5P2	phosphoglucomutase 5 pseudogene 2
ILMN_1775188	0.4858	0.0136	-2.54537	-3.02324	-0.0425	DNAAF5	dynein axonemal assembly factor 5
ILMN_2184064	0.4858	0.0136	-2.54529	-3.02341	-0.295	ARRDC4	arrestin domain containing 4
ILMN_2137464	0.4858	0.0136	2.5449	-3.02426	0.237	DVL3	dishevelled segment polarity protein 3
ILMN_1841540	0.4858	0.0137	-2.54474	-3.0246	-0.0383
ILMN_1769839	0.4858	0.0137	-2.5446	-3.02489	-0.0629	L1TD1	LINE1 type transposase domain containing 1
ILMN_1696021	0.4858	0.0137	2.54382	-3.02656	0.439	KPNA6	karyopherin subunit alpha 6
ILMN_1686401	0.4858	0.0137	2.5438	-3.02661	0.307	PDCD2	programmed cell death 2
ILMN_1696311	0.4858	0.0137	2.54351	-3.02724	0.343	IMPAD1	inositol monophosphatase domain containing 1
ILMN_2148847	0.4858	0.0137	2.54318	-3.02793	0.306	AKIRIN2	akirin 2
ILMN_2377288	0.4858	0.0137	2.543	-3.02831	0.0628	CYP3A43	cytochrome P450 family 3 subfamily A member 43
ILMN_1709484	0.4858	0.0137	2.54298	-3.02836	0.208	BLM	Bloom syndrome RecQ like helicase
ILMN_1872506	0.4858	0.0137	-2.54294	-3.02844	-0.0598
ILMN_2412624	0.4858	0.0137	-2.54266	-3.02905	-0.121	TP53I11	tumor protein p53 inducible protein 11
ILMN_1662020	0.4858	0.0137	-2.54259	-3.02919	-0.0485
ILMN_1768488	0.4858	0.0137	2.54259	-3.02921	0.26	TERF2	telomeric repeat binding factor 2
ILMN_1696528	0.4858	0.0137	2.54233	-3.02977	0.0464	TAS2R13	taste 2 receptor member 13
ILMN_1709483	0.4858	0.0138	2.54136	-3.03183	0.16	MRE11A	MRE11 homolog A, double strand break repair nuclease
ILMN_1688240	0.4858	0.0138	2.54121	-3.03215	0.0504	PHOSPHO1	phosphoethanolamine/phosphocholine phosphatase
ILMN_1856706	0.4858	0.0138	-2.54119	-3.0322	-0.0491	LINC01526	long intergenic non-protein coding RNA 1526
ILMN_1676005	0.4858	0.0138	2.54112	-3.03234	0.269	KPNA1	karyopherin subunit alpha 1
ILMN_1677534	0.4858	0.0138	-2.54086	-3.03289	-0.4	SCAP	SREBF chaperone
ILMN_2308849	0.4858	0.0138	-2.54079	-3.03305	-0.491	MYADM	myeloid associated differentiation marker
ILMN_1670238	0.2698	0.000553	3.65877	-0.27646	0.733	CDC45	cell division cycle 45
ILMN_1663390	0.366	0.0035	3.04623	-1.87251	0.882	CDC20	cell division cycle 20
ILMN_1753440	0.4858	0.0138	2.54047	-3.03373	0.334	DCAF16	DDB1 and CUL4 associated factor 16
ILMN_1733859	0.4858	0.0138	2.54024	-3.03422	0.107
ILMN_2224143	0.4858	0.0138	2.53997	-3.0348	0.303	MCM3	minichromosome maintenance complex component 3
ILMN_1763487	0.4858	0.0138	-2.53939	-3.03605	-0.324	CTLA4	cytotoxic T-lymphocyte associated protein 4
ILMN_2413808	0.4858	0.0139	-2.5389	-3.03708	-0.374	CD53	CD53 molecule
ILMN_1814282	0.4858	0.0139	-2.53883	-3.03724	-0.312	AEN	apoptosis enhancing nuclease
ILMN_1771841	0.4858	0.0139	2.53839	-3.03818	0.22	FOSL1	FOS like 1, AP-1 transcription factor subunit
ILMN_2048223	0.4858	0.0139	2.53829	-3.03838	0.0541	TTTY2	testis-specific transcript, Y-linked 2 (non-protein coding)
ILMN_1703843	0.4858	0.0139	2.53804	-3.03894	0.12	RAPH1	Ras association (RalGDS/AF-6) and pleckstrin homology domains 1
ILMN_1688127	0.4858	0.0139	2.53751	-3.04006	0.394
ILMN_2335704	0.4858	0.0139	-2.53736	-3.04038	-0.401	NCF4	neutrophil cytosolic factor 4
ILMN_1815115	0.4858	0.0139	2.53733	-3.04045	0.333	CYC1	cytochrome c1
ILMN_1669921	0.4858	0.0139	2.53685	-3.04147	0.0501	TEX14	testis expressed 14, intercellular bridge forming factor
ILMN_1782633	0.4858	0.0139	2.53637	-3.0425	0.391	BOLA2	bolA family member 2
ILMN_1914354	0.4858	0.014	-2.53583	-3.04366	-0.0536
ILMN_1716298	0.4858	0.014	2.5354	-3.04456	0.0723
ILMN_2284744	0.4858	0.014	-2.53502	-3.04537	-0.455	HNMT	histamine N-methyltransferase
ILMN_1713749	0.4858	0.014	-2.53494	-3.04555	-0.473	CORO1A	coronin 1A
ILMN_1720850	0.4858	0.014	-2.53477	-3.04591	-0.388	BAZ2B	bromodomain adjacent to zinc finger domain 2B
ILMN_1709194	0.4858	0.014	2.53464	-3.04618	0.066	GPR155	G protein-coupled receptor 155
ILMN_1683096	0.4858	0.014	-2.53387	-3.04782	-0.41
ILMN_1835601	0.4858	0.014	2.53363	-3.04835	0.0652
ILMN_1666449	0.4858	0.0141	-2.53346	-3.04871	-0.204	FAM134C	family with sequence similarity 134 member C
ILMN_2102356	0.4858	0.0141	2.53293	-3.04983	0.0422	OR8U9	olfactory receptor family 8 subfamily U member 9
ILMN_1872883	0.4858	0.0141	-2.53282	-3.05007	-0.0486
ILMN_2073010	0.4858	0.0141	2.53272	-3.05029	0.239	TMEM203	transmembrane protein 203
ILMN_2407124	0.4858	0.0141	2.53219	-3.0514	0.23	MCM8	minichromosome maintenance 8 homologous recombination repair factor
ILMN_1850892	0.4858	0.0141	2.53139	-3.05312	0.0483
ILMN_1742473	0.4858	0.0141	-2.53107	-3.0538	-0.117	VSTM4	V-set and transmembrane domain containing 4
ILMN_1761939	0.4858	0.0142	2.53033	-3.05537	0.139	TIPIN	TIMELESS interacting protein
ILMN_1870562	0.4858	0.0142	2.53006	-3.05595	0.0464
ILMN_1785158	0.4858	0.0142	2.52994	-3.0562	0.245	HERPUD2	HERPUD family member 2
ILMN_2390338	0.4858	0.0142	2.52962	-3.05689	0.462	UBE2E3	ubiquitin conjugating enzyme E2 E3
ILMN_1785413	0.4858	0.0142	-2.52936	-3.05744	-0.481	ATP2C2	ATPase secretory pathway Ca2+ transporting 2
ILMN_2266309	0.4858	0.0142	2.52901	-3.05819	0.308	CEPT1	choline/ethanolamine phosphotransferase 1
ILMN_2122952	0.4858	0.0142	2.52863	-3.059	0.4	CISD1	CDGSH iron sulfur domain 1
ILMN_1666503	0.4858	0.0142	-2.52827	-3.05977	-0.457	DENND2A	DENN domain containing 2A
ILMN_1745593	0.4858	0.0143	2.5276	-3.0612	0.186	STMN1	stathmin 1
ILMN_1742544	0.4858	0.0143	-2.52758	-3.06124	-0.377	MEF2C	myocyte enhancer factor 2C
ILMN_1789786	0.4858	0.0143	-2.52756	-3.06127	-0.0823	COA3	cytochrome c oxidase assembly factor 3
ILMN_1746457	0.4858	0.0143	2.52688	-3.06272	0.246	GTF3C2	general transcription factor IIIC subunit 2
ILMN_1659874	0.4858	0.0143	2.52678	-3.06295	0.236	SCAF4	SR-related CTD associated factor 4
ILMN_1685002	0.4858	0.0143	2.52617	-3.06423	0.215	RCE1	Ras converting CAAX endopeptidase 1
ILMN_1874175	0.4858	0.0143	2.52615	-3.06429	0.0451
ILMN_1856633	0.4858	0.0143	2.52592	-3.06476	0.0673
ILMN_1673673	0.4858	0.0143	2.52587	-3.06487	0.45	PBK	PDZ binding kinase
ILMN_1781999	0.4858	0.0143	2.52575	-3.06514	0.324	ABCF2	ATP binding cassette subfamily F member 2
ILMN_1707380	0.4858	0.0143	-2.52549	-3.06569	-0.0894	PRELP	proline and arginine rich end leucine rich repeat protein
ILMN_1733324	0.4858	0.0144	-2.52518	-3.06634	-0.113	ITGB3	integrin subunit beta 3
ILMN_1788387	0.4858	0.0144	-2.5248	-3.06714	-0.339	UGGT2	UDP-glucose glycoprotein glucosyltransferase 2
ILMN_1724738	0.4858	0.0144	2.52416	-3.06852	0.0597	TFR2	transferrin receptor 2
ILMN_1805148	0.4858	0.0144	-2.5239	-3.06907	-0.149	CLHC1	clathrin heavy chain linker domain containing 1
ILMN_1880965	0.4858	0.0144	2.52379	-3.06931	0.0451
ILMN_2328666	0.2698	0.000277	-3.87398	0.32597	-0.644	CD83	CD83 molecule
ILMN_1780582	0.3161	0.00126	-3.39215	-0.99418	-0.57	CD83	CD83 molecule
ILMN_1713322	0.4858	0.0144	2.5227	-3.07162	0.344	CCZ1B	CCZ1 homolog B, vacuolar protein trafficking and biogenesis associated
ILMN_2379644	0.4062	0.00589	-2.86045	-2.31703	-0.659	CD74	CD74 molecule
ILMN_1736567	0.4612	0.0108	-2.63402	-2.83089	-0.595	CD74	CD74 molecule
ILMN_1728073	0.4858	0.0145	2.52186	-3.07341	0.17	DENND1A	DENN domain containing 1A
ILMN_1696939	0.4858	0.0145	2.52173	-3.07367	0.046
ILMN_2055165	0.4858	0.0145	2.5215	-3.07416	0.315	MRFAP1	Morf4 family associated protein 1
ILMN_1743017	0.4858	0.0145	2.52137	-3.07444	0.0553	PRDM16	PR/SET domain 16
ILMN_1672503	0.4858	0.0145	-2.52125	-3.07471	-0.485	DPYSL2	dihydropyrimidinase like 2
ILMN_1810181	0.4858	0.0145	2.52088	-3.07548	0.121	PCGF6	polycomb group ring finger 6
ILMN_1688335	0.4858	0.0145	2.52033	-3.07665	0.165	MAGEB2	MAGE family member B2
ILMN_1674983	0.4858	0.0145	-2.52019	-3.07696	-0.423
ILMN_1653861	0.4858	0.0145	-2.52016	-3.07703	-0.32	SCMH1	sex comb on midleg homolog 1 (Drosophila)
ILMN_2188333	0.3432	0.00184	-3.26707	-1.319	-0.558	CD69	CD69 molecule
ILMN_1850546	0.4858	0.0145	2.5201	-3.07714	0.044
ILMN_1753342	0.4858	0.0145	-2.52003	-3.0773	-0.407	SAT1	spermidine/spermine N1-acetyltransferase 1
ILMN_1861089	0.4858	0.0146	-2.51983	-3.07771	-0.0475
ILMN_1753468	0.0715	7.33e-06	-4.93205	3.52501	-0.677	CD63	CD63 molecule
ILMN_1791827	0.4858	0.0146	2.51922	-3.07901	0.278
ILMN_1774997	0.4858	0.0146	2.51918	-3.0791	0.1	BCL2L11	BCL2 like 11
ILMN_2229922	0.4858	0.0146	-2.51918	-3.0791	-0.301	KIAA1551	KIAA1551
ILMN_1784364	0.4858	0.0146	-2.51916	-3.07915	-0.241	STARD5	StAR related lipid transfer domain containing 5
ILMN_1789224	0.4858	0.0146	-2.51902	-3.07945	-0.0755
ILMN_1800540	0.4858	0.0133	-2.55459	-3.00347	-0.629	CD55	CD55 molecule (Cromer blood group)
ILMN_1862896	0.4858	0.0146	-2.51838	-3.08081	-0.0601
ILMN_1743199	0.4858	0.0146	-2.51823	-3.08111	-0.35	EGR2	early growth response 2
ILMN_1845524	0.4858	0.0146	-2.51759	-3.08248	-0.0424
ILMN_1671603	0.4858	0.0146	2.51751	-3.08264	0.404	MED30	mediator complex subunit 30
ILMN_1870093	0.4858	0.0146	-2.51728	-3.08313	-0.0515
ILMN_1807719	0.4858	0.0147	-2.51715	-3.0834	-0.294	CTNS	cystinosin, lysosomal cystine transporter
ILMN_1727073	0.4858	0.0147	2.51685	-3.08405	0.249	MEA1	male-enhanced antigen 1
ILMN_1709085	0.4858	0.0147	2.51685	-3.08405	0.0854	GSG2	germ cell associated 2, haspin
ILMN_2394438	0.4858	0.0147	-2.51675	-3.08426	-0.215	FAM177A1	family with sequence similarity 177 member A1
ILMN_1660544	0.4858	0.0147	-2.51563	-3.08663	-0.178	ARRDC4	arrestin domain containing 4
ILMN_1899963	0.4858	0.0147	-2.51551	-3.08689	-0.0561
ILMN_1691526	0.4858	0.0147	2.51541	-3.0871	0.169	MAPKAP1	mitogen-activated protein kinase associated protein 1
ILMN_1779252	0.4858	0.0147	-2.51527	-3.08739	-0.431	TRIM22	tripartite motif containing 22
ILMN_2197128	0.4858	0.0147	-2.51502	-3.08793	-0.465	OSR1	odd-skipped related transciption factor 1
ILMN_2208903	0.3161	0.00109	-3.43914	-0.87013	-0.865	CD52	CD52 molecule
ILMN_1895883	0.4858	0.0147	2.51495	-3.08809	0.0666
ILMN_2178244	0.4858	0.0147	2.5149	-3.08819	0.177	NAA40	N(alpha)-acetyltransferase 40, NatD catalytic subunit
ILMN_2249552	0.4858	0.0148	2.51435	-3.08935	0.045	GTF2A1	general transcription factor IIA subunit 1
ILMN_2315964	0.4858	0.0148	2.51426	-3.08954	0.118	PSRC1	proline and serine rich coiled-coil 1
ILMN_1862792	0.4858	0.0148	-2.51397	-3.09016	-0.0567
ILMN_1726230	0.4858	0.0148	-2.5138	-3.09052	-0.205	CD1B	CD1b molecule
ILMN_1802355	0.4858	0.0148	2.51368	-3.09078	0.273	RBM18	RNA binding motif protein 18
ILMN_1762464	0.486	0.0148	2.51304	-3.09212	0.0591	MBL2	mannose binding lectin 2
ILMN_1815130	0.486	0.0148	2.51277	-3.09269	0.252	MICALL1	MICAL like 1
ILMN_1761283	0.486	0.0148	-2.51268	-3.09289	-0.0546
ILMN_1729713	0.4863	0.0149	2.51177	-3.09482	0.0423	RAB23	RAB23, member RAS oncogene family
ILMN_2176450	0.4863	0.0149	-2.51161	-3.09515	-0.0471	CA3	carbonic anhydrase 3
ILMN_2137003	0.4863	0.0149	2.51134	-3.09573	0.0513	C16orf78	chromosome 16 open reading frame 78
ILMN_1666482	0.4863	0.0149	2.51119	-3.09605	0.174	SP2	Sp2 transcription factor
ILMN_1776038	0.4863	0.0149	2.51097	-3.09652	0.242	UBXN2A	UBX domain protein 2A
ILMN_2061043	0.4858	0.0144	-2.52278	-3.07145	-0.513	CD48	CD48 molecule
ILMN_1861534	0.4863	0.0149	2.51064	-3.0972	0.0509
ILMN_1803429	0.3648	0.0034	-3.05665	-1.84699	-0.745	CD44	CD44 molecule (Indian blood group)
ILMN_1900475	0.4882	0.015	2.50846	-3.10183	0.0455
ILMN_2112357	0.3517	0.00255	-3.1557	-1.60142	-0.533	CD300LF	CD300 molecule like family member f
ILMN_2180371	0.4883	0.015	2.50796	-3.10289	0.168	FAM216A	family with sequence similarity 216 member A
ILMN_1810423	0.4883	0.015	2.50767	-3.1035	0.386	RPP40	ribonuclease P/MRP subunit p40
ILMN_1723520	0.4137	0.0064	-2.83036	-2.38715	-0.823	CD1A	CD1a molecule
ILMN_2246083	0.3937	0.00455	2.95351	-2.09686	0.966	CCZ1B	CCZ1 homolog B, vacuolar protein trafficking and biogenesis associated
ILMN_1750563	0.4891	0.0151	2.50585	-3.10736	0.48	CERCAM	cerebral endothelial cell adhesion molecule
ILMN_2392818	0.4891	0.0151	2.50573	-3.10759	0.111	RTKN	rhotekin
ILMN_1872404	0.4891	0.0151	-2.50572	-3.10763	-0.213	CCDC50	coiled-coil domain containing 50
ILMN_1669377	0.4907	0.0151	-2.50417	-3.11091	-0.364	AP4B1	adaptor related protein complex 4 beta 1 subunit
ILMN_1679382	0.3432	0.00212	3.21902	-1.44164	0.511	CCT2	chaperonin containing TCP1 subunit 2
ILMN_1780968	0.491	0.0152	2.50325	-3.11284	0.0537
ILMN_1676580	0.491	0.0152	2.50315	-3.11306	0.0583	HIST1H4D	histone cluster 1, H4d
ILMN_1801939	0.2698	0.000509	3.68478	-0.2047	0.811	CCNB2	cyclin B2
ILMN_1686498	0.4918	0.0152	2.50202	-3.11545	0.0482
ILMN_1659058	0.4924	0.0153	2.50127	-3.11704	0.313	PPP1R10	protein phosphatase 1 regulatory subunit 10
ILMN_1763612	0.4933	0.0153	-2.50029	-3.11909	-0.268	TMEM132D	transmembrane protein 132D
ILMN_1786273	0.4935	0.0153	2.4999	-3.11993	0.249	C1orf122	chromosome 1 open reading frame 122
ILMN_1769385	0.4935	0.0153	2.49893	-3.12197	0.0602	LHX9	LIM homeobox 9
ILMN_1696190	0.4935	0.0154	2.49882	-3.12221	0.27	STRN4	striatin 4
ILMN_2264597	0.4935	0.0154	-2.49857	-3.12273	-0.0551	MID2	midline 2
ILMN_1763852	0.4935	0.0154	-2.49851	-3.12286	-0.378	ACACB	acetyl-CoA carboxylase beta
ILMN_1849950	0.4935	0.0154	2.49843	-3.12301	0.0661
ILMN_1735762	0.4935	0.0154	-2.4983	-3.1233	-0.341	NPNT	nephronectin
ILMN_1659085	0.4939	0.0154	-2.49772	-3.12453	-0.0522	WFDC12	WAP four-disulfide core domain 12
ILMN_2278729	0.4948	0.0154	2.49678	-3.12651	0.341	EIF3B	eukaryotic translation initiation factor 3 subunit B
ILMN_1676822	0.4951	0.0154	-2.49629	-3.12754	-0.354	C2orf40	chromosome 2 open reading frame 40
ILMN_1657475	0.4953	0.0155	-2.49577	-3.12864	-0.329	GALT	galactose-1-phosphate uridylyltransferase
ILMN_2229940	0.4953	0.0155	2.49531	-3.12961	0.273	PRADC1	protease associated domain containing 1
ILMN_1776818	0.4953	0.0155	2.49484	-3.13059	0.0468
ILMN_1891922	0.4953	0.0155	-2.49472	-3.13085	-0.0604
ILMN_1723895	0.4953	0.0155	2.49463	-3.13104	0.294	GTF3C5	general transcription factor IIIC subunit 5
ILMN_1660985	0.4953	0.0155	-2.49453	-3.13125	-0.0442
ILMN_1786125	0.1885	7.32e-05	4.2747	1.49595	0.574	CCNA2	cyclin A2
ILMN_2192281	0.4964	0.0156	-2.49316	-3.13413	-0.246	CARD8	caspase recruitment domain family member 8
ILMN_1866118	0.4964	0.0156	2.4929	-3.13468	0.0504
ILMN_1755199	0.4967	0.0156	-2.49135	-3.13795	-0.0435
ILMN_2393712	0.4967	0.0156	-2.49122	-3.13822	-0.463	CTTN	cortactin
ILMN_1874954	0.4967	0.0157	2.4911	-3.13846	0.0387
ILMN_1778136	0.4967	0.0157	-2.49099	-3.13871	-0.346	ZMYND15	zinc finger MYND-type containing 15
ILMN_1698832	0.4967	0.0157	-2.49044	-3.13985	-0.054
ILMN_1905356	0.4967	0.0157	2.49042	-3.13991	0.342
ILMN_1678966	0.4967	0.0157	2.49033	-3.14009	0.469	SNRPF	small nuclear ribonucleoprotein polypeptide F
ILMN_1806123	0.4967	0.0157	2.48984	-3.14112	0.341	MRPL23	mitochondrial ribosomal protein L23
ILMN_1874735	0.4967	0.0157	2.48959	-3.14164	0.0813
ILMN_2372922	0.4967	0.0157	2.48911	-3.14266	0.123	PTPA	protein phosphatase 2 phosphatase activator
ILMN_1908356	0.4967	0.0157	-2.48893	-3.14304	-0.0405
ILMN_1845304	0.4967	0.0158	2.48866	-3.1436	0.0458	LINC01335	long intergenic non-protein coding RNA 1335
ILMN_1761176	0.4967	0.0158	-2.48854	-3.14385	-0.455	GRIPAP1	GRIP1 associated protein 1
ILMN_1878511	0.4967	0.0158	-2.48828	-3.14441	-0.0447
ILMN_1891944	0.4967	0.0158	-2.48826	-3.14445	-0.0657
ILMN_1669479	0.4967	0.0158	2.48784	-3.14534	0.167	MEST	mesoderm specific transcript
ILMN_1862353	0.4967	0.0158	2.48752	-3.146	0.0383
ILMN_1794597	0.4967	0.0158	-2.48747	-3.1461	-0.0798	ZKSCAN7	zinc finger with KRAB and SCAN domains 7
ILMN_2337928	0.4967	0.0158	-2.48728	-3.14652	-0.262	CXCR5	C-X-C motif chemokine receptor 5
ILMN_1797046	0.4967	0.0158	2.48707	-3.14695	0.191	MTHFSD	methenyltetrahydrofolate synthetase domain containing
ILMN_2160476	0.4819	0.0129	-2.56744	-2.97584	-0.584	CCL22	C-C motif chemokine ligand 22
ILMN_1700563	0.4967	0.0158	-2.48693	-3.14725	-0.0983	ZNF552	zinc finger protein 552
ILMN_1886899	0.4967	0.0158	-2.48633	-3.14851	-0.0552
ILMN_1862564	0.4967	0.0159	-2.48602	-3.14915	-0.0424
ILMN_1689704	0.4967	0.0159	2.48598	-3.14924	0.433	TMEM5	transmembrane protein 5
ILMN_1792597	0.4967	0.0159	-2.48575	-3.14973	-0.211	CRYGS	crystallin gamma S
ILMN_1668068	0.4967	0.0159	-2.48557	-3.1501	-0.0546
ILMN_1708132	0.4967	0.0159	2.48511	-3.15106	0.0624	NUP50	nucleoporin 50
ILMN_1743288	0.4967	0.0159	2.48501	-3.15127	0.0784
ILMN_1769129	0.3982	0.00535	-2.89515	-2.23553	-0.842	CCL19	C-C motif chemokine ligand 19
ILMN_1754332	0.4968	0.0159	2.48464	-3.15206	0.247	SNORD14C	small nucleolar RNA, C/D box 14C
ILMN_1909247	0.4975	0.016	2.48351	-3.15444	0.156
ILMN_1665760	0.4975	0.016	-2.48344	-3.15457	-0.0318	C10orf53	chromosome 10 open reading frame 53
ILMN_1778599	0.4975	0.016	-2.48332	-3.15484	-0.312	SP140	SP140 nuclear body protein
ILMN_1759075	0.4983	0.016	-2.48242	-3.15671	-0.334	TNFRSF13B	TNF receptor superfamily member 13B
ILMN_1757837	0.4989	0.016	-2.48176	-3.1581	-0.171	CFAP206	cilia and flagella associated protein 206
ILMN_1757497	0.4989	0.016	2.4815	-3.15866	0.432	VGF	VGF nerve growth factor inducible
ILMN_1691299	0.4993	0.0161	-2.48093	-3.15985	-0.197	CFAP126	cilia and flagella associated protein 126
ILMN_1740609	0.4453	0.00955	-2.68188	-2.72494	-0.537	CCL14	C-C motif chemokine ligand 14
ILMN_1790549	0.5012	0.0161	-2.47893	-3.16405	-0.407	TSPAN3	tetraspanin 3
ILMN_1711712	0.5016	0.0162	-2.47837	-3.16522	-0.085	GAS2L2	growth arrest specific 2 like 2
ILMN_1855459	0.5026	0.0162	2.47713	-3.16782	0.0435
ILMN_1676277	0.5026	0.0162	2.47704	-3.168	0.106
ILMN_1722483	0.5034	0.0163	2.476	-3.17018	0.0791
ILMN_2217601	0.5034	0.0163	-2.47589	-3.17042	-0.199	ANXA9	annexin A9
ILMN_1784706	0.5036	0.0163	-2.47544	-3.17135	-0.455
ILMN_1682636	0.5036	0.0163	-2.47528	-3.1717	-0.489	CXCL2	C-X-C motif chemokine ligand 2
ILMN_1671276	0.5042	0.0163	-2.47432	-3.1737	-0.0434
ILMN_1900358	0.5042	0.0163	-2.47417	-3.17402	-0.0416
ILMN_2409298	0.5042	0.0163	2.4739	-3.17459	0.302	NUSAP1	nucleolar and spindle associated protein 1
ILMN_1910754	0.5042	0.0164	2.47358	-3.17524	0.0476
ILMN_1834318	0.5042	0.0164	-2.4734	-3.17563	-0.0568
ILMN_1766401	0.5042	0.0164	2.47328	-3.17589	0.0449	OR1M1	olfactory receptor family 1 subfamily M member 1
ILMN_1845666	0.5044	0.0164	2.47167	-3.17926	0.045
ILMN_1675191	0.5044	0.0164	-2.47159	-3.17941	-0.141	GAPT	GRB2-binding adaptor protein, transmembrane
ILMN_1651987	0.2698	0.000406	3.75588	-0.00705	0.526	CCDC167	coiled-coil domain containing 167
ILMN_2383484	0.5044	0.0165	2.47101	-3.18064	0.34	C19orf48	chromosome 19 open reading frame 48
ILMN_1671437	0.5044	0.0165	-2.47095	-3.18075	-0.116	MAP3K15	mitogen-activated protein kinase kinase kinase 15
ILMN_1811410	0.5044	0.0165	2.47091	-3.18084	0.0397	RHAG	Rh-associated glycoprotein
ILMN_1814985	0.5044	0.0165	2.47053	-3.18163	0.154	PDLIM7	PDZ and LIM domain 7
ILMN_1785804	0.5044	0.0165	2.4703	-3.18211	0.109	ERVW-1	endogenous retrovirus group W member 1
ILMN_1717781	0.5044	0.0165	-2.47004	-3.18266	-0.178	VPS11	VPS11, CORVET/HOPS core subunit
ILMN_1793220	0.5044	0.0165	2.46941	-3.18398	0.27	GART	phosphoribosylglycinamide formyltransferase, phosphoribosylglycinamide synthetase, phosphoribosylaminoimidazole synthetase
ILMN_1805828	0.5044	0.0165	2.46931	-3.18419	0.262	VRK1	vaccinia related kinase 1
ILMN_1743208	0.5044	0.0166	2.46906	-3.18472	0.174	NEDD1	neural precursor cell expressed, developmentally down-regulated 1
ILMN_1727017	0.5044	0.0166	-2.46905	-3.18473	-0.475	SFTPB	surfactant protein B
ILMN_1728883	0.5044	0.0166	-2.46882	-3.18521	-0.0498
ILMN_1829914	0.5044	0.0166	2.46789	-3.18714	0.0533
ILMN_1733869	0.5044	0.0166	2.46787	-3.18719	0.419	OGDH	oxoglutarate dehydrogenase
ILMN_1750402	0.5044	0.0166	2.46787	-3.1872	0.0422	SNORD107	small nucleolar RNA, C/D box 107
ILMN_1682953	0.5044	0.0166	2.46773	-3.18749	0.409
ILMN_1681324	0.5044	0.0166	2.46767	-3.18762	0.22	MRPL49	mitochondrial ribosomal protein L49
ILMN_1782730	0.5044	0.0166	2.46762	-3.18772	0.161	ZNF473	zinc finger protein 473
ILMN_1671693	0.5044	0.0166	2.46754	-3.18789	0.387	TPGS2	tubulin polyglutamylase complex subunit 2
ILMN_1790625	0.3432	0.00184	3.2661	-1.32148	0.618	CBX3	chromobox 3
ILMN_2289849	0.5044	0.0166	-2.46699	-3.18903	-0.481	FCGR2A	Fc fragment of IgG receptor IIa
ILMN_2226763	0.5044	0.0166	-2.46673	-3.18957	-0.0659	H2AFB2	H2A histone family member B2
ILMN_1738347	0.5044	0.0167	-2.46551	-3.19212	-0.467	RNPEP	arginyl aminopeptidase
ILMN_1752312	0.5044	0.0167	2.46528	-3.1926	0.0312
ILMN_1812364	0.5044	0.0167	2.4651	-3.19299	0.0422
ILMN_1716441	0.5044	0.0167	2.46505	-3.19309	0.234	SNORD4A	small nucleolar RNA, C/D box 4A
ILMN_1734559	0.5044	0.0167	2.46463	-3.19396	0.124	SORD	sorbitol dehydrogenase
ILMN_1861160	0.5044	0.0168	2.46407	-3.19513	0.0475
ILMN_1725234	0.5044	0.0168	-2.46363	-3.19604	-0.0533	CYP19A1	cytochrome P450 family 19 subfamily A member 1
ILMN_1652952	0.5044	0.0168	2.46347	-3.19639	0.101	RASAL2	RAS protein activator like 2
ILMN_1691295	0.5044	0.0168	-2.46339	-3.19655	-0.054	NECTIN1	nectin cell adhesion molecule 1
ILMN_2399190	0.5044	0.0168	-2.46335	-3.19664	-0.0932	TNFSF13	tumor necrosis factor superfamily member 13
ILMN_2396903	0.5044	0.0168	-2.46334	-3.19666	-0.16	KCNJ15	potassium voltage-gated channel subfamily J member 15
ILMN_1740772	0.5044	0.0168	-2.46305	-3.19727	-0.415	APBB3	amyloid beta precursor protein binding family B member 3
ILMN_1815679	0.5044	0.0168	-2.46304	-3.19727	-0.19	COL6A6	collagen type VI alpha 6 chain
ILMN_1774336	0.5044	0.0168	2.46221	-3.19902	0.329	POLE2	DNA polymerase epsilon 2, accessory subunit
ILMN_1733669	0.5044	0.0168	2.46204	-3.19936	0.15	CDH18	cadherin 18
ILMN_1770281	0.5044	0.0169	2.46185	-3.19977	0.0488	ERC1	ELKS/RAB6-interacting/CAST family member 1
ILMN_1727098	0.5044	0.0169	-2.46175	-3.19996	-0.33	PPP1R16B	protein phosphatase 1 regulatory subunit 16B
ILMN_1698369	0.5044	0.0169	2.46095	-3.20163	0.193
ILMN_2120072	0.5044	0.0169	2.4609	-3.20174	0.294	FAM161A	family with sequence similarity 161 member A
ILMN_1866116	0.5044	0.0169	2.46081	-3.20193	0.0554
ILMN_1770678	0.6204	0.0453	2.04669	-4.00548	0.534	CBX2	chromobox 2
ILMN_1680732	0.5044	0.0169	2.46046	-3.20267	0.0405	B4GALT2	beta-1,4-galactosyltransferase 2
ILMN_1830411	0.5044	0.0169	2.46037	-3.20285	0.0524
ILMN_1708959	0.5044	0.0169	-2.46033	-3.20294	-0.0443	MFN1	mitofusin 1
ILMN_1670317	0.5044	0.0169	2.46019	-3.20322	0.0444
ILMN_1842818	0.5044	0.0169	2.46019	-3.20323	0.0544
ILMN_1733680	0.5044	0.0169	-2.46008	-3.20346	-0.232	AZI2	5-azacytidine induced 2
ILMN_1686416	0.5044	0.0169	-2.46007	-3.20347	-0.0638	GRIP2	glutamate receptor interacting protein 2
ILMN_1755721	0.5044	0.0169	-2.45993	-3.20376	-0.192	ANXA9	annexin A9
ILMN_1673746	0.5044	0.0169	2.45979	-3.20405	0.256
ILMN_1682110	0.5047	0.017	2.45913	-3.20543	0.0648	HOXA10	homeobox A10
ILMN_1797318	0.5047	0.017	2.45887	-3.20597	0.289	HSPA14	heat shock protein family A (Hsp70) member 14
ILMN_1722981	0.5047	0.017	-2.45886	-3.206	-0.412	TLR5	toll like receptor 5
ILMN_2196569	0.5051	0.017	2.45826	-3.20725	0.315	NUP93	nucleoporin 93
ILMN_1724490	0.5051	0.017	2.45803	-3.20773	0.204	PSPC1	paraspeckle component 1
ILMN_1831607	0.5052	0.017	2.45747	-3.20889	0.0498
ILMN_1781001	0.5052	0.0171	-2.45716	-3.20953	-0.471	SOCS3	suppressor of cytokine signaling 3
ILMN_2264011	0.5052	0.0171	-2.45716	-3.20954	-0.3	GRAP	GRB2-related adaptor protein
ILMN_1844971	0.5052	0.0171	2.45697	-3.20993	0.0453
ILMN_1702127	0.5055	0.0171	2.4563	-3.21133	0.0575	SPRR2G	small proline rich protein 2G
ILMN_1679195	0.5055	0.0171	2.45612	-3.21171	0.411
ILMN_1715718	0.5055	0.0171	-2.45603	-3.2119	-0.26	ZNF784	zinc finger protein 784
ILMN_1822552	0.5065	0.0171	2.45503	-3.21396	0.0447
ILMN_1763663	0.5079	0.0172	2.45339	-3.21739	0.26
ILMN_1771039	0.5079	0.0172	2.45333	-3.2175	0.227	GTSE1	G2 and S-phase expressed 1
ILMN_2141807	0.5079	0.0172	2.45317	-3.21784	0.204	KNSTRN	kinetochore localized astrin/SPAG5 binding protein
ILMN_2391355	0.5079	0.0172	2.45279	-3.21862	0.298	STAMBP	STAM binding protein
ILMN_1657972	0.5079	0.0172	2.45272	-3.21878	0.0495	HHIPL1	HHIP like 1
ILMN_1676383	0.5081	0.0173	2.45235	-3.21955	0.0697	ENPP6	ectonucleotide pyrophosphatase/phosphodiesterase 6
ILMN_2333766	0.5083	0.0173	-2.45172	-3.22085	-0.292
ILMN_1752575	0.5083	0.0173	2.45163	-3.22103	0.153
ILMN_1652580	0.5087	0.0173	2.45115	-3.22204	0.264	POLD1	DAN polymerase delta 1, catalytic subunit
ILMN_1658271	0.511	0.0174	2.44906	-3.22638	0.0958	LSS	lanosterol synthase (2,3-oxidosqualene-lanosterol cyclase)
ILMN_2385688	0.511	0.0174	-2.44878	-3.22697	-0.343	RABL2B	RAB, member of RAS oncogene family-like 2B
ILMN_1692032	0.511	0.0174	2.44828	-3.22801	0.0437
ILMN_1757660	0.6094	0.042	-2.0803	-3.94487	-0.545	CAPS	calcyphosine
ILMN_2097358	0.511	0.0175	2.44763	-3.22936	0.0531
ILMN_1859732	0.511	0.0175	2.44746	-3.2297	0.048
ILMN_1785252	0.511	0.0175	-2.44741	-3.22981	-0.367	SLC26A6	solute carrier family 26 member 6
ILMN_1893053	0.511	0.0175	2.44737	-3.22989	0.0453
ILMN_1821231	0.511	0.0175	-2.44717	-3.23031	-0.0478
ILMN_1751346	0.511	0.0175	-2.44669	-3.23129	-0.435	ERBB3	erb-b2 receptor tyrosine kinase 3
ILMN_1915188	0.511	0.0175	-2.44668	-3.23132	-0.288	MID2	midline 2
ILMN_2046751	0.5111	0.0175	2.44604	-3.23266	0.0488	PGLYRP3	peptidoglycan recognition protein 3
ILMN_1681641	0.5111	0.0175	2.4458	-3.23314	0.133
ILMN_1813998	0.5111	0.0176	2.44557	-3.23363	0.0791	DPPA5	developmental pluripotency associated 5
ILMN_1899018	0.5111	0.0176	-2.44555	-3.23368	-0.0407
ILMN_1657862	0.5111	0.0176	2.44538	-3.23402	0.334	AHCY	adenosylhomocysteinase
ILMN_2195914	0.5112	0.0176	2.44503	-3.23474	0.353	GGH	gamma-glutamyl hydrolase
ILMN_1793563	0.5112	0.0176	2.44468	-3.23548	0.3	DCTN1	dynactin subunit 1
ILMN_2089340	0.5112	0.0176	2.44425	-3.23637	0.23	FAM127B	family with sequence similarity 127 member B
ILMN_1687546	0.5112	0.0176	2.44423	-3.23641	0.167	HSP90AA1	heat shock protein 90 alpha family class A member 1
ILMN_1768558	0.5112	0.0176	2.44411	-3.23665	0.153
ILMN_1742064	0.5116	0.0177	-2.44323	-3.23848	-0.0652
ILMN_1902976	0.5116	0.0177	-2.44314	-3.23867	-0.0491
ILMN_1671051	0.5116	0.0177	2.4431	-3.23874	0.0532	CD276	CD276 molecule
ILMN_1679782	0.5119	0.0177	2.44235	-3.24029	0.0764	BLOC1S2	biogenesis of lysosomal organelles complex 1 subunit 2
ILMN_1755732	0.5119	0.0177	-2.44231	-3.24039	-0.125	ARMC9	armadillo repeat containing 9
ILMN_2168217	0.5119	0.0177	-2.44175	-3.24154	-0.408	GPR183	G protein-coupled receptor 183
ILMN_1874506	0.5119	0.0178	2.44073	-3.24366	0.109	MINCR	MYC-induced long noncoding RNA
ILMN_1697512	0.5119	0.0178	2.44041	-3.24432	0.0434	SLC32A1	solute carrier family 32 member 1
ILMN_2285112	0.5119	0.0178	-2.4402	-3.24475	-0.327	FBXO11	F-box protein 11
ILMN_2327775	0.5119	0.0178	2.44011	-3.24495	0.0715	TRIM23	tripartite motif containing 23
ILMN_2329263	0.5119	0.0178	2.43991	-3.24536	0.0839	NFIC	nuclear factor I C
ILMN_1873244	0.5119	0.0178	2.43984	-3.24551	0.0405
ILMN_1661251	0.5119	0.0178	2.43975	-3.24568	0.0749	SPAM1	sperm adhesion molecule 1
ILMN_1739178	0.5119	0.0178	2.43949	-3.24623	0.0643	TBXA2R	thromboxane A2 receptor
ILMN_1661717	0.5119	0.0178	2.43938	-3.24645	0.33	TFDP1	transcription factor Dp-1
ILMN_1776260	0.5119	0.0178	2.43922	-3.24679	0.486	PPIAL4A	peptidylprolyl isomerase A like 4A
ILMN_1836751	0.5119	0.0178	2.43899	-3.24726	0.129
ILMN_1716057	0.5119	0.0179	-2.4389	-3.24745	-0.36	CAPN2	calpain 2
ILMN_1664212	0.5119	0.0179	-2.43866	-3.24795	-0.0591
ILMN_1663113	0.5119	0.0179	2.43812	-3.24907	0.413	TTLL12	tubulin tyrosine ligase like 12
ILMN_1731193	0.5119	0.0179	2.43779	-3.24974	0.11	BCL2L12	BCL2 like 12
ILMN_2401769	0.5119	0.0179	2.43751	-3.25033	0.281
ILMN_1732150	0.5119	0.0179	2.43739	-3.25058	0.156	KIAA0101	KIAA0101
ILMN_1912745	0.5119	0.0179	2.43718	-3.251	0.0495
ILMN_1796353	0.5119	0.0179	2.43714	-3.25109	0.051
ILMN_1843840	0.5119	0.0179	-2.43713	-3.25111	-0.0435
ILMN_2062468	0.5119	0.0179	-2.437	-3.25137	-0.496	IGFBP7	insulin like growth factor binding protein 7
ILMN_2049900	0.5119	0.0179	2.43698	-3.25141	0.0459	BTBD8	BTB domain containing 8
ILMN_1697433	0.5119	0.018	-2.43659	-3.25223	-0.155	CYP46A1	cytochrome P450 family 46 subfamily A member 1
ILMN_1819608	0.5119	0.018	-2.43613	-3.25319	-0.49	ARRB1	arrestin beta 1
ILMN_2390946	0.5119	0.018	-2.43566	-3.25415	-0.0929	SCARF1	scavenger receptor class F member 1
ILMN_1725233	0.5119	0.018	2.43562	-3.25423	0.0478
ILMN_1717334	0.5119	0.018	-2.43561	-3.25425	-0.288	VAV1	vav guanine nucleotide exchange factor 1
ILMN_1783690	0.5142	0.0196	-2.40203	-3.3233	-0.613	CAPN8	calpain 8
ILMN_2211910	0.5119	0.018	2.43537	-3.25475	0.0497
ILMN_1782618	0.5124	0.018	2.43474	-3.25605	0.32	C9orf16	chromosome 9 open reading frame 16
ILMN_1677108	0.3566	0.0031	-3.08867	-1.76819	-0.994	CAPN13	calpain 13
ILMN_1753790	0.5125	0.0181	2.43419	-3.25719	0.243	ZPR1	ZPR1 zinc finger
ILMN_1796216	0.5127	0.0181	-2.43362	-3.25837	-0.32	VASH1	vasohibin 1
ILMN_1846799	0.5127	0.0181	-2.43356	-3.2585	-0.0556
ILMN_1677920	0.5129	0.0181	-2.43318	-3.25927	-0.261	LTF	lactotransferrin
ILMN_1683059	0.5129	0.0181	2.43293	-3.2598	0.266	SIRT5	sirtuin 5
ILMN_2094332	0.5131	0.0182	-2.4319	-3.26192	-0.128
ILMN_1880761	0.5131	0.0182	2.43165	-3.26244	0.0744
ILMN_1758599	0.5131	0.0182	-2.43139	-3.26298	-0.18	FAM163A	family with sequence similarity 163 member A
ILMN_1752406	0.5131	0.0182	2.43061	-3.26459	0.332
ILMN_1657139	0.5131	0.0182	2.43055	-3.2647	0.256	ADAT1	adenosine deaminase, tRNA specific 1
ILMN_2101034	0.5546	0.0264	-2.27975	-3.5682	-0.581	CAPN12	calpain 12
ILMN_1768816	0.5131	0.0182	2.43027	-3.26529	0.219	TMPO	thymopoietin
ILMN_1771026	0.5131	0.0182	2.43018	-3.26547	0.303	GARS	glycyl-tRNA synthetase
ILMN_1686961	0.5131	0.0182	2.43017	-3.26548	0.093	FGFBP3	fibroblast growth factor binding protein 3
ILMN_2365023	0.4957	0.0155	-2.49393	-3.13252	-0.71	C9orf24	chromosome 9 open reading frame 24
ILMN_1815366	0.5131	0.0182	-2.43012	-3.26559	-0.328
ILMN_2045994	0.5131	0.0183	-2.42988	-3.2661	-0.34	SEPW1	selenoprotein W, 1
ILMN_1732720	0.5131	0.0183	2.42983	-3.26621	0.04	LENG9	leukocyte receptor cluster member 9
ILMN_1777397	0.5138	0.0183	2.4289	-3.26812	0.422	MSX1	msh homeobox 1
ILMN_1763695	0.5125	0.0181	-2.43428	-3.25701	-0.733	C9orf24	chromosome 9 open reading frame 24
ILMN_1856110	0.5138	0.0183	-2.4285	-3.26894	-0.0524
ILMN_2340599	0.5138	0.0183	2.42835	-3.26925	0.0802	EPHA8	EPH receptor A8
ILMN_1889741	0.5142	0.0184	-2.4274	-3.27121	-0.0485
ILMN_1785709	0.5142	0.0184	2.42711	-3.27181	0.0547
ILMN_1771884	0.5142	0.0184	-2.42702	-3.27199	-0.151	ZNF45	zinc finger protein 45
ILMN_2071473	0.5142	0.0184	2.42686	-3.27232	0.0455	FAM47C	family with sequence similarity 47 member C
ILMN_1795672	0.5142	0.0184	2.42597	-3.27415	0.0448
ILMN_1887486	0.5142	0.0185	-2.42563	-3.27486	-0.0388
ILMN_1664014	0.5142	0.0185	2.42563	-3.27486	0.205	STOX1	storkhead box 1
ILMN_1747217	0.5142	0.0185	2.42493	-3.27631	0.177	C15orf41	chromosome 15 open reading frame 41
ILMN_1886566	0.5142	0.0185	2.42485	-3.27647	0.0434
ILMN_2374692	0.5142	0.0185	2.42478	-3.27661	0.285	WAC	WW domain containing adaptor with coiled-coil
ILMN_1852384	0.5142	0.0185	2.42416	-3.27789	0.295	ERC1	ELKS/RAB6-interacting/CAST family member 1
ILMN_1733675	0.5142	0.0185	-2.42375	-3.27873	-0.362	MPP1	membrane palmitoylated protein 1
ILMN_1788254	0.5142	0.0186	2.42331	-3.27965	0.326	PGAM5	PGAM family member 5, mitochondrial serine/threonine protein phosphatase
ILMN_1742167	0.5142	0.0186	2.42318	-3.27991	0.454	TUBA1C	tubulin alpha 1c
ILMN_1740409	0.5142	0.0186	2.42296	-3.28036	0.0583	OR8G5	olfactory receptor family 8 subfamily G member 5
ILMN_1775734	0.5142	0.0186	-2.42286	-3.28056	-0.319	SH2D3C	SH2 domain containing 3C
ILMN_1656369	0.5412	0.0249	-2.30351	-3.52143	-0.848	C8orf4	chromosome 8 open reading frame 4
ILMN_1687848	0.3161	0.00115	-3.42266	-0.91374	-0.785	C7	complement component 7
ILMN_2403852	0.5142	0.0186	-2.42155	-3.28325	-0.222	CYTH1	cytohesin 1
ILMN_1915154	0.5142	0.0187	2.42109	-3.28421	0.0451
ILMN_1810752	0.3413	0.00161	-3.31211	-1.20294	-1.52	C4BPA	complement component 4 binding protein alpha
ILMN_1776490	0.5142	0.0187	2.42002	-3.2864	0.445	C17orf53	chromosome 17 open reading frame 53
ILMN_1741054	0.5142	0.0187	2.41988	-3.2867	0.228	SLC5A6	solute carrier family 5 member 6
ILMN_1705774	0.5142	0.0187	2.41988	-3.2867	0.366	TIGD5	tigger transposable element derived 5
ILMN_1727618	0.5142	0.0187	2.41956	-3.28735	0.338	NDUFAF6	NADH:ubiquinone oxidoreductase complex assembly factor 6
ILMN_1701269	0.5142	0.0187	2.4193	-3.2879	0.42	ATP5C1	ATP synthase, H+ transporting, mitochondrial F1 complex, gamma polypeptide 1
ILMN_1655788	0.5142	0.0187	-2.41925	-3.28798	-0.0427	ZNF780A	zinc finger protein 780A
ILMN_2290628	0.5142	0.0187	-2.41922	-3.28806	-0.103	IL16	interleukin 16
ILMN_2135756	0.5142	0.0188	2.41909	-3.28831	0.141	HSF2BP	heat shock transcription factor 2 binding protein
ILMN_2380850	0.5142	0.0188	2.41836	-3.28983	0.257	SDCCAG3	serologically defined colon cancer antigen 3
ILMN_1734568	0.5142	0.0188	2.41814	-3.29028	0.0459	PC	pyruvate carboxylase
ILMN_1799600	0.5142	0.0188	-2.41793	-3.29072	-0.287	STARD8	StAR related lipid transfer domain containing 8
ILMN_1881011	0.5142	0.0188	2.41792	-3.29073	0.0454
ILMN_1835080	0.5142	0.0188	2.41755	-3.29148	0.0456
ILMN_1763704	0.5142	0.0188	-2.41744	-3.29171	-0.456	RGS11	regulator of G-protein signaling 11
ILMN_1845088	0.5142	0.0188	2.41709	-3.29244	0.0593
ILMN_1775171	0.5142	0.0188	-2.41707	-3.29247	-0.0926	WIPF2	WAS/WASL interacting protein family member 2
ILMN_1684802	0.5142	0.0189	2.41695	-3.29272	0.198	TAF5	TATA-box binding protein associated factor 5
ILMN_2182750	0.5142	0.0189	2.4166	-3.29345	0.284	DDX1	DEAD/H-box helicase 1
ILMN_1839896	0.5142	0.0189	-2.41617	-3.29434	-0.0508
ILMN_2283388	0.4246	0.00748	2.77316	-2.51887	0.527	C20orf24	chromosome 20 open reading frame 24
ILMN_1857897	0.5142	0.0189	-2.41596	-3.29476	-0.242
ILMN_1754894	0.2698	0.00028	-3.87083	0.31702	-0.723	C1orf162	chromosome 1 open reading frame 162
ILMN_1684412	0.5142	0.0189	2.41572	-3.29524	0.0362
ILMN_1754839	0.5142	0.0189	2.41566	-3.29537	0.242	DHX15	DEAH-box helicase 15
ILMN_2331082	0.5142	0.0189	-2.41512	-3.29648	-0.403	MS4A7	membrane spanning 4-domains A7
ILMN_1783497	0.5142	0.0189	2.41504	-3.29664	0.139	PANK1	pantothenate kinase 1
ILMN_1778316	0.5142	0.0189	2.41499	-3.29675	0.0744	NOM1	nucleolar protein with MIF4G domain 1
ILMN_1780397	0.5142	0.019	-2.41485	-3.29704	-0.245	TRAF3IP3	TRAF3 interacting protein 3
ILMN_2195390	0.5142	0.019	2.41464	-3.29746	0.052	SUMO1P1	SUMO1 pseudogene 1
ILMN_1721978	0.5142	0.019	-2.41451	-3.29773	-0.413	CARD11	caspase recruitment domain family member 11
ILMN_1749212	0.5142	0.019	2.41442	-3.29792	0.164	TMEM189-UBE2V1	TMEM189-UBE2V1 readthrough
ILMN_1698578	0.5142	0.019	-2.41427	-3.29822	-0.0484
ILMN_1676728	0.5142	0.019	2.41399	-3.2988	0.436	DLK2	delta like non-canonical Notch ligand 2
ILMN_1721895	0.5142	0.019	2.41392	-3.29895	0.0551
ILMN_1671378	0.5142	0.019	-2.4139	-3.29899	-0.0855
ILMN_2361163	0.5142	0.019	2.41355	-3.29971	0.441	SSBP3	single stranded DNA binding protein 3
ILMN_1818538	0.5142	0.019	2.4133	-3.30021	0.0518
ILMN_1784595	0.5142	0.019	-2.41327	-3.30028	-0.0605	SBF2	SET binding factor 2
ILMN_1750409	0.5142	0.0191	-2.41272	-3.30141	-0.371	RAB9A	RAB9A, member RAS oncogene family
ILMN_1669842	0.5142	0.0191	2.4127	-3.30145	0.153	CHAF1A	chromatin assembly factor 1 subunit A
ILMN_1781345	0.5142	0.0191	2.4125	-3.30185	0.0479
ILMN_1888658	0.5142	0.0191	-2.41221	-3.30245	-0.073
ILMN_1853778	0.5142	0.0191	-2.4121	-3.30268	-0.0561
ILMN_1770130	0.5142	0.0191	2.41201	-3.30287	0.0497	C10orf113	chromosome 10 open reading frame 113
ILMN_1750400	0.3161	0.00125	-3.39415	-0.98892	-0.563	C19orf66	chromosome 19 open reading frame 66
ILMN_2393243	0.5142	0.0191	2.41194	-3.30302	0.22	GTPBP8	GTP binding protein 8 (putative)
ILMN_1796430	0.5142	0.0191	2.41178	-3.30334	0.281	PSMD3	proteasome 26S subunit, non-ATPase 3
ILMN_1728626	0.5142	0.0191	2.41169	-3.30353	0.286	WDR5	WD repeat domain 5
ILMN_1652549	0.5142	0.0191	2.4112	-3.30454	0.168	DTNA	dystrobrevin alpha
ILMN_1800638	0.5142	0.0191	-2.41105	-3.30484	-0.218	CELF2	CUGBP, Elav-like family member 2
ILMN_1917147	0.5142	0.0191	-2.41078	-3.30539	-0.0716
ILMN_2352090	0.5142	0.0191	-2.41072	-3.30551	-0.465	GPRC5C	G protein-coupled receptor class C group 5 member C
ILMN_1738677	0.5142	0.0192	-2.41065	-3.30566	-0.339	PRPF8	pre-mRNA processing factor 8
ILMN_1752914	0.5142	0.0192	-2.41054	-3.30589	-0.196	ARHGAP31	Rho GTPase activating protein 31
ILMN_2389013	0.5142	0.0192	2.41043	-3.30611	0.265	ADRM1	adhesion regulating molecule 1
ILMN_1773493	0.5142	0.0192	2.40941	-3.30819	0.294	TIMM23	translocase of inner mitochondrial membrane 23
ILMN_1665311	0.5142	0.0192	2.40933	-3.30836	0.0878	STH	saitohin
ILMN_1688959	0.5142	0.0192	-2.40909	-3.30885	-0.481	CD27	CD27 molecule
ILMN_1797735	0.5142	0.0192	-2.40906	-3.30891	-0.335	C1orf21	chromosome 1 open reading frame 21
ILMN_1734196	0.5142	0.0192	2.40892	-3.30921	0.0453
ILMN_1911240	0.5142	0.0193	-2.40862	-3.30983	-0.0423
ILMN_1727511	0.5142	0.0193	2.40852	-3.31002	0.0489
ILMN_2372011	0.5142	0.0193	2.40797	-3.31116	0.311	SCAND1	SCAN domain containing 1
ILMN_2326675	0.5142	0.0193	2.40794	-3.31121	0.184	NR2C1	nuclear receptor subfamily 2 group C member 1
ILMN_1800654	0.5142	0.0193	2.40784	-3.31142	0.0519	MCM7	minichromosome maintenance complex component 7
ILMN_1762808	0.5142	0.0193	2.40781	-3.31149	0.0867
ILMN_1846075	0.5142	0.0193	-2.40762	-3.31186	-0.0445
ILMN_1790534	0.5142	0.0193	-2.40753	-3.31205	-0.305
ILMN_1739236	0.5142	0.0193	2.40753	-3.31206	0.234	ZNF668	zinc finger protein 668
ILMN_2097790	0.5142	0.0193	2.40752	-3.31208	0.318	FAAP20	Fanconi anemia core complex associated protein 20
ILMN_1768107	0.5142	0.0193	-2.4069	-3.31334	-0.0389
ILMN_1782241	0.5142	0.0193	2.4068	-3.31356	0.0871
ILMN_2190214	0.5142	0.0193	-2.40678	-3.31359	-0.0798	CHIC1	cysteine rich hydrophobic domain 1
ILMN_1690066	0.5142	0.0194	2.40618	-3.31481	0.248	TIGD2	tigger transposable element derived 2
ILMN_1694273	0.5142	0.0194	2.40596	-3.31528	0.0543	HRH3	histamine receptor H3
ILMN_1655642	0.5142	0.0194	2.40556	-3.31608	0.251	FANCI	Fanconi anemia complementation group I
ILMN_1689153	0.5142	0.0194	-2.40544	-3.31633	-0.0533
ILMN_2242921	0.5142	0.0194	-2.40528	-3.31666	-0.0663	IKZF2	IKAROS family zinc finger 2
ILMN_1812915	0.5142	0.0195	-2.40415	-3.31897	-0.139	TNFRSF10B	TNF receptor superfamily member 10b
ILMN_1676222	0.3703	0.00383	-3.01425	-1.95044	-0.527	C16orf89	chromosome 16 open reading frame 89
ILMN_1741997	0.5142	0.0195	2.40405	-3.31917	0.231	SNRPC	small nuclear ribonucleoprotein polypeptide C
ILMN_1685722	0.5142	0.0195	-2.40403	-3.31923	-0.32	EIF4A2	eukaryotic translation initiation factor 4A2
ILMN_1768553	0.5142	0.0195	-2.40402	-3.31924	-0.148
ILMN_1665909	0.5142	0.0195	-2.40393	-3.31941	-0.317	LASP1	LIM and SH3 protein 1
ILMN_1800573	0.5142	0.0195	2.40377	-3.31975	0.438	RPS21	ribosomal protein S21
ILMN_2241627	0.5142	0.0195	2.40303	-3.32127	0.303	MAGEC1	MAGE family member C1
ILMN_1735292	0.5142	0.0195	-2.40291	-3.32152	-0.074	ENKUR	enkurin, TRPC channel interacting protein
ILMN_1733579	0.5142	0.0195	-2.40273	-3.32188	-0.237	EVI2A	ecotropic viral integration site 2A
ILMN_2348487	0.5142	0.0195	-2.40238	-3.3226	-0.0639	ADGRE3	adhesion G protein-coupled receptor E3
ILMN_1903692	0.5142	0.0196	2.40208	-3.32321	0.0496
ILMN_1677402	0.3566	0.00293	-3.10817	-1.71993	-0.83	C11orf96	chromosome 11 open reading frame 96
ILMN_1787347	0.5142	0.0196	-2.40203	-3.32331	-0.0467
ILMN_1683370	0.5142	0.0196	-2.40187	-3.32363	-0.0529	C16orf71	chromosome 16 open reading frame 71
ILMN_2269673	0.5142	0.0196	-2.40142	-3.32455	-0.0423	CDY1	chromodomain Y-linked 1
ILMN_2346316	0.5142	0.0196	2.40134	-3.32471	0.126
ILMN_1742052	0.5142	0.0196	-2.40109	-3.32524	-0.0933	SERPINB9	serpin family B member 9
ILMN_1658356	0.5142	0.0196	-2.40107	-3.32527	-0.451	PAMR1	peptidase domain containing associated with muscle regeneration 1
ILMN_1817786	0.5142	0.0196	-2.40106	-3.3253	-0.049
ILMN_1673553	0.5142	0.0196	2.40089	-3.32565	0.174	PTH2	parathyroid hormone 2
ILMN_1662741	0.5142	0.0196	-2.40078	-3.32586	-0.313	LPAR2	lysophosphatidic acid receptor 2
ILMN_2414399	0.5142	0.0196	2.40076	-3.3259	0.311	NME1	NME/NM23 nucleoside diphosphate kinase 1
ILMN_1882271	0.5142	0.0196	-2.40039	-3.32666	-0.0436
ILMN_1727646	0.5142	0.0197	2.40029	-3.32687	0.0486
ILMN_1792419	0.515	0.0197	2.39944	-3.32861	0.0427	FRMD7	FERM domain containing 7
ILMN_1862070	0.5152	0.0197	2.39906	-3.32937	0.051
ILMN_1899696	0.5153	0.0197	2.39877	-3.32998	0.078
ILMN_1894072	0.5155	0.0197	-2.39843	-3.33068	-0.311	PIK3CG	phosphatidylinositol-4,5-bisphosphate 3-kinase catalytic subunit gamma
ILMN_1690963	0.5161	0.0198	2.39746	-3.33265	0.398	ASAP1	ArfGAP with SH3 domain, ankyrin repeat and PH domain 1
ILMN_1803889	0.5161	0.0198	-2.39726	-3.33306	-0.424	BICDL2	BICD family like cargo adaptor 2
ILMN_1670305	0.5161	0.0198	-2.39716	-3.33327	-0.413	SERPING1	serpin family G member 1
ILMN_1657010	0.5161	0.0198	2.39707	-3.33344	0.0399
ILMN_2218780	0.5165	0.0198	2.39637	-3.33487	0.206	PDP1	pyruvate dehyrogenase phosphatase catalytic subunit 1
ILMN_1659856	0.5165	0.0199	-2.39592	-3.33579	-0.083	FAM167B	family with sequence similarity 167 member B
ILMN_1706539	0.5165	0.0199	-2.3959	-3.33583	-0.258	KDM3B	lysine demethylase 3B
ILMN_1672149	0.5165	0.0199	2.3959	-3.33584	0.209	CHCHD1	coiled-coil-helix-coiled-coil-helix domain containing 1
ILMN_1862871	0.5167	0.0199	2.39526	-3.33714	0.0452
ILMN_1683082	0.5167	0.0199	2.39519	-3.33728	0.251	RPUSD1	RNA pseudouridylate synthase domain containing 1
ILMN_2319996	0.5167	0.0199	-2.3951	-3.33746	-0.153	RPL3	ribosomal protein L3
ILMN_1651364	0.5169	0.0199	-2.39468	-3.33832	-0.186	PCBD2	pterin-4 alpha-carbinolamine dehydratase 2
ILMN_1795911	0.5169	0.0199	-2.39452	-3.33866	-0.288	TTC37	tetratricopeptide repeat domain 37
ILMN_1835877	0.5169	0.02	-2.39412	-3.33946	-0.0563
ILMN_1662848	0.5169	0.02	-2.39409	-3.33952	-0.155	TXNDC15	thioredoxin domain containing 15
ILMN_1698685	0.5169	0.02	2.39385	-3.34001	0.206	MATN2	matrilin 2
ILMN_1762308	0.5173	0.02	-2.39321	-3.34133	-0.287
ILMN_1689110	0.5173	0.02	2.39286	-3.34203	0.201	NOB1	NIN1/PSMD8 binding protein 1 homolog
ILMN_1660027	0.5173	0.02	-2.3927	-3.34236	-0.214	FCGR2B	Fc fragment of IgG receptor IIb
ILMN_1899979	0.5173	0.02	-2.39269	-3.34238	-0.0448
ILMN_1859595	0.5181	0.0201	-2.39171	-3.34439	-0.044
ILMN_1736568	0.5181	0.0201	2.39169	-3.34442	0.217	CASP2	caspase 2
ILMN_1827034	0.5182	0.0201	2.39099	-3.34584	0.0559
ILMN_1914965	0.5182	0.0201	2.39089	-3.34604	0.0557
ILMN_1884847	0.5182	0.0201	-2.3908	-3.34623	-0.044
ILMN_2402798	0.5182	0.0201	2.39061	-3.34661	0.27	AP2M1	adaptor related protein complex 2 mu 1 subunit
ILMN_1906754	0.5182	0.0202	-2.39007	-3.34773	-0.0403
ILMN_1860758	0.5182	0.0202	-2.38985	-3.34817	-0.0479
ILMN_1726210	0.5182	0.0202	-2.38984	-3.34819	-0.438	GPIHBP1	glycosylphosphatidylinositol anchored high density lipoprotein binding protein 1
ILMN_2154671	0.5182	0.0202	2.38983	-3.34822	0.361	COX6B1	cytochrome c oxidase subunit 6B1
ILMN_2268241	0.5182	0.0202	-2.38944	-3.34899	-0.0611	ABL1	ABL proto-oncogene 1, non-receptor tyrosine kinase
ILMN_1774802	0.5182	0.0202	-2.38909	-3.34972	-0.0603
ILMN_2323491	0.5182	0.0202	2.38884	-3.35022	0.213	NUP62	nucleoporin 62
ILMN_1682792	0.0999	1.95e-05	4.65751	2.66331	0.533	BYSL	bystin like
ILMN_1680091	0.5182	0.0202	2.38853	-3.35085	0.274	POP7	POP7 homolog, ribonuclease P/MRP subunit
ILMN_1766079	0.5182	0.0202	-2.38838	-3.35115	-0.304	SULT1C2	sulfotransferase family 1C member 2
ILMN_2382990	0.5182	0.0202	2.38826	-3.3514	0.281	HK1	hexokinase 1
ILMN_1790987	0.5182	0.0203	2.38792	-3.35209	0.252	HUWE1	HECT, UBA and WWE domain containing 1, E3 ubiquitin protein ligase
ILMN_2411794	0.5182	0.0203	-2.38789	-3.35216	-0.288	PTPRA	protein tyrosine phosphatase, receptor type A
ILMN_2170625	0.5182	0.0203	-2.38759	-3.35277	-0.445
ILMN_1662026	0.2491	0.000184	-3.99988	0.68716	-0.557	BTK	Bruton tyrosine kinase
ILMN_2372040	0.5182	0.0203	2.38736	-3.35324	0.342	MTFP1	mitochondrial fission process 1
ILMN_1665289	0.5183	0.0203	-2.3868	-3.35438	-0.253	OGFOD3	2-oxoglutarate and iron dependent oxygenase domain containing 3
ILMN_1850533	0.5183	0.0203	-2.38664	-3.35469	-0.0405	LOC102723703	uncharacterized LOC102723703
ILMN_1747943	0.5183	0.0203	2.38653	-3.35493	0.104	ZNF695	zinc finger protein 695
ILMN_1709474	0.5183	0.0203	2.3863	-3.3554	0.245	ALMS1	ALMS1, centrosome and basal body associated protein
ILMN_1702759	0.5183	0.0204	-2.386	-3.356	-0.31	TMX4	thioredoxin related transmembrane protein 4
ILMN_1660898	0.5183	0.0204	-2.38573	-3.35655	-0.0485
ILMN_1769201	0.5183	0.0204	-2.38559	-3.35684	-0.433	ELF3	E74 like ETS transcription factor 3
ILMN_1699709	0.5183	0.0204	-2.38555	-3.35693	-0.046	RFC5	replication factor C subunit 5
ILMN_1723274	0.5187	0.0204	-2.38503	-3.35797	-0.0603	GPR55	G protein-coupled receptor 55
ILMN_1730972	0.5191	0.0204	2.38452	-3.35901	0.0409
ILMN_1759211	0.5197	0.0205	-2.38381	-3.36046	-0.0478
ILMN_1686862	0.5197	0.0205	-2.38353	-3.36103	-0.112	HLX	H2.0 like homeobox
ILMN_1864442	0.5197	0.0205	2.3834	-3.36129	0.0488	GABRR2	gamma-aminobutyric acid type A receptor rho2 subunit
ILMN_2360229	0.5197	0.0205	2.38316	-3.36179	0.324	MAPKAP1	mitogen-activated protein kinase associated protein 1
ILMN_1781465	0.5203	0.0205	2.38254	-3.36305	0.0662
ILMN_1912926	0.5206	0.0206	2.38178	-3.36458	0.0364
ILMN_1856378	0.5206	0.0206	2.38123	-3.3657	0.0372
ILMN_1720300	0.5206	0.0206	2.38117	-3.36582	0.045	PRR5	proline rich 5
ILMN_1654722	0.5206	0.0206	2.38112	-3.36592	0.119	MPV17L	MPV17 mitochondrial inner membrane protein like
ILMN_1785732	0.5206	0.0206	2.38059	-3.367	0.377	TNFAIP6	TNF alpha induced protein 6
ILMN_1787897	0.5206	0.0206	-2.38057	-3.36703	-0.304	CXCL1	C-X-C motif chemokine ligand 1
ILMN_1772527	0.5206	0.0206	2.38055	-3.36708	0.281	ATG101	autophagy related 101
ILMN_1768795	0.5206	0.0206	-2.38047	-3.36725	-0.0587	RNF113B	ring finger protein 113B
ILMN_1654427	0.5206	0.0206	2.38026	-3.36766	0.0473
ILMN_1685115	0.5206	0.0207	-2.38021	-3.36778	-0.095	HEXIM1	hexamethylene bisacetamide inducible 1
ILMN_1736101	0.5212	0.0207	2.37948	-3.36925	0.0463	GLIS1	GLIS family zinc finger 1
ILMN_1797189	0.5212	0.0207	-2.37899	-3.37025	-0.161	MAP3K12	mitogen-activated protein kinase kinase kinase 12
ILMN_1653524	0.5212	0.0207	-2.3788	-3.37063	-0.0664	SIKE1	suppressor of IKBKE 1
ILMN_1723480	0.5726	0.03	-2.22544	-3.67361	-0.698	BST2	bone marrow stromal cell antigen 2
ILMN_1859552	0.5212	0.0207	-2.37863	-3.37098	-0.049
ILMN_1704976	0.5212	0.0208	2.37817	-3.3719	0.0338
ILMN_1797425	0.5212	0.0208	-2.37778	-3.3727	-0.365	DDX55	DEAD-box helicase 55
ILMN_1914037	0.5212	0.0208	2.37762	-3.37303	0.0404	FOXP4-AS1	FOXP4 antisense RNA 1
ILMN_1681812	0.5212	0.0208	2.37751	-3.37325	0.166	HIF1AN	hypoxia inducible factor 1 alpha subunit inhibitor
ILMN_1910364	0.5212	0.0208	2.37738	-3.37351	0.051
ILMN_2085258	0.5212	0.0208	2.37685	-3.37458	0.0436	OR4D10	olfactory receptor family 4 subfamily D member 10
ILMN_1676924	0.5212	0.0208	-2.37644	-3.37542	-0.429	CD247	CD247 molecule
ILMN_1677815	0.5212	0.0208	2.37641	-3.37547	0.256	KCNH6	potassium voltage-gated channel subfamily H member 6
ILMN_2343264	0.5212	0.0209	-2.37622	-3.37587	-0.492	PRDM16	PR/SET domain 16
ILMN_2196479	0.5212	0.0209	2.37605	-3.37621	0.185	XRN2	5'-3' exoribonuclease 2
ILMN_1730325	0.5212	0.0209	2.37591	-3.37649	0.0939	FLAD1	flavin adenine dinucleotide synthetase 1
ILMN_2394102	0.5212	0.0209	2.37579	-3.37674	0.173	STRN4	striatin 4
ILMN_1824864	0.5212	0.0209	-2.37536	-3.37761	-0.046	LOC150005	uncharacterized LOC150005
ILMN_1731699	0.5212	0.0209	2.37519	-3.37796	0.35	RAB15	RAB15, member RAS oncogene family
ILMN_1658481	0.5212	0.0209	2.375	-3.37834	0.0757
ILMN_1715173	0.5212	0.0209	-2.37495	-3.37843	-0.45	RPS6KA1	ribosomal protein S6 kinase A1
ILMN_1771651	0.5212	0.0209	2.37456	-3.37923	0.239	MON1B	MON1 homolog B, secretory trafficking associated
ILMN_2088876	0.5212	0.0209	2.37447	-3.37942	0.496	MAGEC2	MAGE family member C2
ILMN_1902697	0.5212	0.0209	2.37439	-3.37958	0.0464
ILMN_1790757	0.5212	0.0209	2.37438	-3.37958	0.27	ADSL	adenylosuccinate lyase
ILMN_1825360	0.5212	0.021	-2.37427	-3.37982	-0.0553
ILMN_2273796	0.5212	0.021	2.37406	-3.38025	0.054	ANKZF1	ankyrin repeat and zinc finger domain containing 1
ILMN_1679800	0.5419	0.025	2.30173	-3.52495	0.505	BRIX1	BRX1, biogenesis of ribosomes
ILMN_1710289	0.5219	0.021	2.37309	-3.38221	0.0431	CNTN5	contactin 5
ILMN_1705907	0.5223	0.0211	2.37236	-3.38368	0.234	NUP153	nucleoporin 153
ILMN_1830598	0.5223	0.0211	2.37233	-3.38374	0.0714
ILMN_1747314	0.5223	0.0211	2.37219	-3.38403	0.0537
ILMN_1703142	0.5228	0.0211	-2.37162	-3.38518	-0.261	2019-03-02	membrane associated ring-CH-type finger 2
ILMN_1785527	0.5228	0.0211	2.3714	-3.38562	0.0557	LY6G5B	lymphocyte antigen 6 complex, locus G5B
ILMN_1762952	0.5228	0.0211	2.37115	-3.38613	0.0578	ARTN	artemin
ILMN_1811171	0.5229	0.0211	-2.37087	-3.3867	-0.195	GPR132	G protein-coupled receptor 132
ILMN_1821024	0.5229	0.0211	-2.37061	-3.38722	-0.0425
ILMN_1812865	0.5229	0.0212	2.37046	-3.38752	0.0423
ILMN_1803408	0.5229	0.0212	2.37025	-3.38795	0.189	KRT18	keratin 18
ILMN_1805216	0.5233	0.0212	2.36976	-3.38896	0.22	GPC6	glypican 6
ILMN_1764230	0.5235	0.0212	-2.36912	-3.39024	-0.362	GNPTG	N-acetylglucosamine-1-phosphate transferase gamma subunit
ILMN_1798663	0.5235	0.0212	2.36889	-3.39071	0.0629	MAB21L2	mab-21 like 2
ILMN_1700515	0.5235	0.0212	2.36869	-3.39111	0.34	C17orf58	chromosome 17 open reading frame 58
ILMN_1735438	0.5235	0.0212	2.36867	-3.39115	0.173	GPM6B	glycoprotein M6B
ILMN_1912160	0.5235	0.0212	-2.36861	-3.39128	-0.0767	LOC729558	uncharacterized LOC729558
ILMN_1687960	0.5236	0.0213	2.36807	-3.39237	0.107	LIMK2	LIM domain kinase 2
ILMN_2244484	0.5236	0.0213	2.36792	-3.39267	0.0918	KYAT3	kynurenine aminotransferase 3
ILMN_1779488	0.5236	0.0213	-2.36778	-3.39295	-0.0546	RFX3	regulatory factor X3
ILMN_1804791	0.5236	0.0213	-2.36757	-3.39337	-0.0417
ILMN_1659464	0.5236	0.0213	2.36745	-3.39362	0.0595	FAM71F1	family with sequence similarity 71 member F1
ILMN_1750518	0.5244	0.0214	2.36648	-3.39557	0.445	ALYREF	Aly/REF export factor
ILMN_1673104	0.5244	0.0214	2.36646	-3.39562	0.0496
ILMN_1838581	0.5245	0.0214	-2.36603	-3.39648	-0.0587
ILMN_2194108	0.5245	0.0214	2.36586	-3.39683	0.14	RBMY1J	RNA binding motif protein, Y-linked, family 1, member J
ILMN_1669550	0.5245	0.0214	2.36539	-3.39778	0.409	MAD2L2	MAD2 mitotic arrest deficient-like 2 (yeast)
ILMN_1730304	0.5245	0.0214	2.36533	-3.3979	0.119	ALG10	ALG10, alpha-1,2-glucosyltransferase
ILMN_2361695	0.5245	0.0214	2.3653	-3.39796	0.255	BAG5	BCL2 associated athanogene 5
ILMN_1733991	0.5249	0.0215	2.3646	-3.39937	0.246	UBL7	ubiquitin like 7
ILMN_1795158	0.5249	0.0215	-2.36459	-3.39939	-0.319	FGR	FGR proto-oncogene, Src family tyrosine kinase
ILMN_1878554	0.5249	0.0215	2.3644	-3.39977	0.123
ILMN_1782551	0.5249	0.0215	2.36423	-3.40012	0.334	E2F5	E2F transcription factor 5
ILMN_2349459	0.3413	0.00161	3.3111	-1.20556	0.773	BIRC5	baculoviral IAP repeat containing 5
ILMN_1697440	0.525	0.0215	2.3636	-3.4014	0.291	PRPF4	pre-mRNA processing factor 4
[truncated: 46,804 more rows]

## Sheet: GSE75037
ID	adj.P.Val	P.Value	t	B	logFC	Gene.symbol	Gene.title
ILMN_1673639	0.1083	5.3e-06	-4.87	2.9022	-1.09	ABI3BP	ABI family member 3 binding protein
ILMN_1802096	0.4622	0.00340935	-3.01	-1.9266	-0.508	ABTB1	ankyrin repeat and BTB domain containing 1
ILMN_2148944	0.4501	0.00182815	-3.22	-1.46696	-0.678	ADCY4	adenylate cyclase 4
ILMN_1702858	0.5241	0.00956839	-2.65	-2.67954	-0.593	ADHFE1	alcohol dehydrogenase, iron containing 1
ILMN_1670870	0.4576	0.00206905	-3.18	-1.55848	-0.721	ALCAM	activated leukocyte cell adhesion molecule
ILMN_1680996	0.4479	0.00163024	-3.26	-1.38215	-0.752	ALOX5	arachidonate 5-lipoxygenase
ILMN_2073157	0.5115	0.00811699	-2.71	-2.56037	-0.863	AMY2B	amylase, alpha 2B (pancreatic)
ILMN_1755721	0.4888	0.00645312	-2.79	-2.39359	-0.648	ANXA9	annexin A9
ILMN_1782086	0.4622	0.00280312	-3.08	-1.78252	-0.655	AOC3	amine oxidase, copper containing 3
ILMN_1811392	0.3876	0.00062504	-3.56	-0.669804	-0.679	ARHGAP45	Rho GTPase activating protein 45
ILMN_2048700	0.4437	0.00147231	3.29	-1.30667	0.832	ATAD2	ATPase family, AAA domain containing 2
ILMN_1737833	0.5168	0.00829103	2.7	-2.57576	0.594	ATN1	atrophin 1
ILMN_1783956	0.3989	0.00072426	-3.51	-0.779554	-0.545	ATP8B4	ATPase phospholipid transporting 8B4 (putative)
ILMN_1787280	0.1969	1.614e-05	4.58	2.06795	1.04	AUNIP	aurora kinase A and ninein interacting protein
ILMN_1684217	0.4453	0.00154767	3.27	-1.34366	0.975	AURKB	aurora kinase B
ILMN_1691410	0.4018	0.0008315	-3.47	-0.882338	-1.39	BAMBI	BMP and activin membrane bound inhibitor
ILMN_2234697	0.4576	0.00242052	3.13	-1.67433	1.05	BEX1	brain expressed X-linked 1
ILMN_1803124	0.4232	0.00122524	3.35	-1.17043	0.778	BIRC5	baculoviral IAP repeat containing 5
ILMN_1761486	0.5222	0.00889244	2.68	-2.62651	0.539	BORA	bora, aurora kinase A activator
ILMN_1662026	0.3821	0.0002508	-3.83	0.012061	-0.795	BTK	Bruton tyrosine kinase
ILMN_1783682	0.5175	0.00832033	-2.7	-2.57831	-0.543	C17orf82	chromosome 17 open reading frame 82
ILMN_1907042	0.3846	0.00050637	-3.62	-0.51282	-0.768	C1orf132	chromosome 1 open reading frame 132
ILMN_1754894	0.4622	0.00361774	-2.99	-1.97019	-0.569	C1orf162	chromosome 1 open reading frame 162
ILMN_1687848	0.4795	0.00493902	-2.89	-2.19839	-1.04	C7	complement component 7
ILMN_2365023	0.5222	0.00869744	-2.69	-2.61045	-1.1	C9orf24	chromosome 9 open reading frame 24
ILMN_2109371	0.5241	0.00927056	2.66	-2.65666	0.645	CALCB	calcitonin related polypeptide beta
ILMN_2360730	0.4622	0.00319745	-3.04	-1.87942	-0.682	CAV2	caveolin 2
ILMN_1790625	0.4501	0.00185304	3.22	-1.47696	0.565	CBX3	chromobox 3
ILMN_2160476	0.5104	0.00778152	-2.73	-2.52973	-0.888	CCL22	C-C motif chemokine ligand 22
ILMN_1786125	0.4453	0.00151496	3.28	-1.32783	0.834	CCNA2	cyclin A2
ILMN_1801939	0.4501	0.0017993	3.22	-1.45519	0.916	CCNB2	cyclin B2
ILMN_1714118	0.4576	0.00202348	-3.19	-1.54202	-0.881	CD164L2	CD164 molecule like 2
ILMN_1723520	0.4453	0.00156013	-3.27	-1.3496	-1.51	CD1A	CD1a molecule
ILMN_1726230	0.4271	0.00128654	-3.33	-1.20666	-0.891	CD1B	CD1b molecule
ILMN_1654210	0.3821	0.00017135	-3.93	0.297126	-1.07	CD1C	CD1c molecule
ILMN_2335754	0.3099	7.005e-05	-4.19	0.967352	-1.4	CD1E	CD1e molecule
ILMN_1718754	0.3099	5.128e-05	-4.27	1.20122	-1.47	CD207	CD207 molecule
ILMN_1747622	0.5091	0.00741243	-2.74	-2.49443	-0.733	CD33	CD33 molecule
ILMN_2208903	0.499	0.00707364	-2.76	-2.46042	-0.664	CD52	CD52 molecule
ILMN_1800540	0.5202	0.0084955	-2.7	-2.59342	-0.653	CD55	CD55 molecule (Cromer blood group)
ILMN_2188333	0.4622	0.00334457	-3.02	-1.9125	-0.798	CD69	CD69 molecule
ILMN_2328666	0.4456	0.00157059	-3.27	-1.35455	-0.698	CD83	CD83 molecule
ILMN_1780582	0.5094	0.00761381	-2.74	-2.51391	-0.519	CD83	CD83 molecule
ILMN_1700681	0.4622	0.00351348	-3	-1.94871	-0.524	CD99L2	CD99 molecule like 2
ILMN_1711005	0.4576	0.0025688	3.11	-1.71819	0.783	CDC25A	cell division cycle 25A
ILMN_2294431	0.3876	0.00060302	3.57	-0.643067	0.521	CDC25C	cell division cycle 25C
ILMN_2407619	0.4479	0.00167035	3.25	-1.40015	0.717	CDC25C	cell division cycle 25C
ILMN_1725260	0.4871	0.00601041	2.82	-2.34179	0.709	CDC25C	cell division cycle 25C
ILMN_1670238	0.4501	0.00184253	3.22	-1.47276	0.892	CDC45	cell division cycle 45
ILMN_1737728	0.3821	0.0002112	3.88	0.140635	1.18	CDCA3	cell division cycle associated 3
ILMN_1684045	0.4501	0.00174301	3.24	-1.43167	0.528	CDCA4	cell division cycle associated 4
ILMN_1683450	0.4501	0.00169183	3.24	-1.40961	0.847	CDCA5	cell division cycle associated 5
ILMN_1709294	0.3973	0.00065529	3.54	-0.705013	0.778	CDCA8	cell division cycle associated 8
ILMN_1747911	0.4232	0.00116345	3.36	-1.13202	0.934	CDK1	cyclin dependent kinase 1
ILMN_1710428	0.4576	0.00244502	3.12	-1.68176	0.58	CDK1	cyclin dependent kinase 1
ILMN_1784602	0.477	0.00458618	-2.91	-2.14415	-0.594	CDKN1A	cyclin dependent kinase inhibitor 1A
ILMN_1666305	0.5241	0.00951568	2.65	-2.67554	0.84	CDKN3	cyclin dependent kinase inhibitor 3
ILMN_1651237	0.3989	0.00078859	3.48	-0.842908	0.96	CDT1	chromatin licensing and DNA replication factor 1
ILMN_2392472	0.4977	0.007017	2.76	-2.45457	0.57	CENPA	centromere protein A
ILMN_1716279	0.5115	0.00793321	2.72	-2.54375	0.588	CENPE	centromere protein E
ILMN_1664516	0.5052	0.00727539	2.75	-2.48087	0.785	CENPF	centromere protein F
ILMN_2368721	0.4647	0.00382354	2.98	-2.01082	0.782	CENPM	centromere protein M
ILMN_1668814	0.4805	0.00572232	2.84	-2.30595	0.742	CENPM	centromere protein M
ILMN_1720526	0.3876	0.00060095	3.57	-0.640508	0.779	CENPN	centromere protein N
ILMN_1787477	0.3876	0.00055981	3.59	-0.587634	0.729	CENPO	centromere protein O
ILMN_1777190	0.4181	0.00099621	-3.41	-1.01673	-0.821	CFD	complement factor D
ILMN_1727815	0.4105	0.00091824	-3.44	-0.956151	-0.93	CFI	complement factor I
ILMN_1730229	0.3821	0.00034576	-3.73	-0.22797	-0.697	CGNL1	cingulin like 1
ILMN_1664630	0.4622	0.00366541	2.99	-1.97981	0.718	CHEK1	checkpoint kinase 1
ILMN_2395240	0.4622	0.00348242	3.01	-1.94219	0.702	CHEK2	checkpoint kinase 2
ILMN_1773363	0.4622	0.00282806	-3.08	-1.78905	-0.656	CIITA	class II major histocompatibility complex transactivator
ILMN_1674411	0.4576	0.0020961	3.18	-1.56808	0.618	CKAP2	cytoskeleton associated protein 2
ILMN_1719256	0.4232	0.00111023	3.38	-1.09725	0.649	CKS1B	CDC28 protein kinase regulatory subunit 1B
ILMN_2041046	0.4271	0.00127193	3.34	-1.19818	0.549	CKS1B	CDC28 protein kinase regulatory subunit 1B
ILMN_2072296	0.4576	0.00208253	3.18	-1.56328	0.633	CKS2	CDC28 protein kinase regulatory subunit 2
ILMN_1756326	0.4622	0.00345283	3.01	-1.93591	0.787	CKS2	CDC28 protein kinase regulatory subunit 2
ILMN_1725338	0.4576	0.00249704	-3.12	-1.69729	-0.732	CLDN23	claudin 23
ILMN_2415303	0.4576	0.00232522	-3.14	-1.64469	-0.77	CLEC10A	C-type lectin domain family 10 member A
ILMN_2399363	0.4887	0.00638834	-2.8	-2.38624	-0.616	CLEC4A	C-type lectin domain family 4 member A
ILMN_1796288	0.4802	0.00561546	2.84	-2.29219	0.501	COL5A3	collagen type V alpha 3 chain
ILMN_1658040	0.4622	0.00283545	3.08	-1.79097	1.44	CRABP1	cellular retinoic acid binding protein 1
ILMN_1720484	0.3876	0.00059029	-3.57	-0.627172	-0.668	CRTAP	cartilage associated protein
ILMN_1661861	0.4887	0.00632986	-2.8	-2.37954	-0.815	CSF2	colony stimulating factor 2
ILMN_1763487	0.5183	0.00843306	-2.7	-2.58807	-0.632	CTLA4	cytotoxic T-lymphocyte associated protein 4
ILMN_2393712	0.4755	0.00446384	-2.92	-2.12435	-0.513	CTTN	cortactin
ILMN_1704985	0.4647	0.0038379	-2.97	-2.01357	-0.726	CYP27A1	cytochrome P450 family 27 subfamily A member 1
ILMN_2097259	0.4576	0.00247127	-3.12	-1.68964	-0.557	CYP2U1	cytochrome P450 family 2 subfamily U member 1
ILMN_1697433	0.4802	0.00558488	-2.84	-2.28821	-0.612	CYP46A1	cytochrome P450 family 46 subfamily A member 1
ILMN_1757631	0.5094	0.00770733	2.73	-2.52277	0.523	DBNDD1	dysbindin domain containing 1
ILMN_1862521	0.4622	0.00331264	-3.02	-1.90545	-0.678	DENND1B	DENN domain containing 1B
ILMN_1744308	0.4576	0.00224722	3.15	-1.6195	0.514	DHX33	DEAH-box helicase 33
ILMN_1695226	0.3821	0.00036201	3.72	-0.262278	0.576	DIAPH3	diaphanous related formin 3
ILMN_1685052	0.4622	0.0028036	-3.08	-1.78265	-0.582	DNAH1	dynein axonemal heavy chain 1
ILMN_1791211	0.477	0.00463648	-2.91	-2.15214	-0.646	DOK2	docking protein 2
ILMN_1708107	0.5094	0.00769872	-2.73	-2.52196	-0.832	DPT	dermatopontin
ILMN_1672503	0.4576	0.0024682	-3.12	-1.68872	-0.531	DPYSL2	dihydropyrimidinase like 2
ILMN_1652549	0.4871	0.00607675	2.82	-2.34979	0.579	DTNA	dystrobrevin alpha
ILMN_1777233	0.4687	0.00409922	2.95	-2.06189	0.685	E2F2	E2F transcription factor 2
ILMN_1671568	0.4802	0.00563856	-2.84	-2.29519	-0.621	ECHDC2	enoyl-CoA hydratase domain containing 2
ILMN_1726138	0.4622	0.00333852	3.02	-1.91117	0.582	EI24	EI24, autophagy associated transmembrane protein
ILMN_1706635	0.5222	0.0086346	-2.69	-2.60519	-0.656	ELANE	elastase, neutrophil expressed
ILMN_1660727	0.3989	0.00072158	-3.51	-0.776794	-0.927	ENPP5	ectonucleotide pyrophosphatase/phosphodiesterase 5 (putative)
ILMN_1668092	0.4901	0.00665853	-2.78	-2.41641	-0.67	ESAM	endothelial cell adhesion molecule
ILMN_1763452	0.5175	0.00834848	-2.7	-2.58076	-0.674	EVI2B	ecotropic viral integration site 2B
ILMN_1679158	0.477	0.00454949	-2.92	-2.13827	-0.635	FAAH2	fatty acid amide hydrolase 2
ILMN_1666449	0.526	0.00987432	-2.64	-2.70229	-0.503	FAM134C	family with sequence similarity 134 member C
ILMN_1754538	0.4294	0.00131971	3.32	-1.22554	0.53	FAM213A	family with sequence similarity 213 member A
ILMN_2180371	0.4576	0.00211545	3.17	-1.57487	0.572	FAM216A	family with sequence similarity 216 member A
ILMN_1772446	0.4687	0.00420451	2.94	-2.08049	0.616	FAM222A	family with sequence similarity 222 member A
ILMN_1781943	0.3821	0.00022009	3.86	0.109785	1.12	FAM83D	family with sequence similarity 83 member D
ILMN_1658301	0.4888	0.00649279	-2.79	-2.39805	-0.716	FAM83E	family with sequence similarity 83 member E
ILMN_1777322	0.4576	0.00256112	3.11	-1.71598	0.651	FAM91A1	family with sequence similarity 91 member A1
ILMN_1688423	0.0617	1.26e-06	-5.22	3.97389	-1.99	FCER1A	Fc fragment of IgE receptor Ia
ILMN_2302757	0.4622	0.00331779	-3.02	-1.90659	-1.33	FCGBP	Fc fragment of IgG binding protein
ILMN_1718984	0.4622	0.00338061	-3.02	-1.92038	-1.09	FCGBP	Fc fragment of IgG binding protein
ILMN_2289849	0.5094	0.00770219	-2.73	-2.52229	-0.683	FCGR2A	Fc fragment of IgG receptor IIa
ILMN_1804174	0.3821	0.00036689	-3.71	-0.27228	-0.785	FCGR2B	Fc fragment of IgG receptor IIb
ILMN_2382403	0.477	0.00459547	-2.91	-2.14563	-0.514	FCGR2B	Fc fragment of IgG receptor IIb
ILMN_1755834	0.477	0.00482789	2.9	-2.18174	0.648	FEN1	flap structure-specific endonuclease 1
ILMN_1661733	0.5222	0.00878779	-2.68	-2.61793	-1.18	FOLR1	folate receptor 1
ILMN_2085441	0.3821	0.00028753	-3.79	-0.090143	-0.747	FOXD4L1	forkhead box D4-like 1
ILMN_1781867	0.3821	0.00031841	-3.76	-0.16639	-0.671	FOXD4L1	forkhead box D4-like 1
ILMN_2344971	0.3662	0.00013507	4	0.475271	1.34	FOXM1	forkhead box M1
ILMN_1716400	0.3876	0.00058031	3.58	-0.614451	0.969	FOXM1	forkhead box M1
ILMN_1716246	0.4952	0.00689444	-2.77	-2.44175	-0.536	FRZB	frizzled-related protein
ILMN_1682015	0.4734	0.00443305	2.93	-2.11928	1.2	GAL	galanin and GMAP prepropeptide
ILMN_1794552	0.3662	9.794e-05	4.09	0.716079	0.623	GAP43	growth associated protein 43
ILMN_2364088	0.477	0.00481605	-2.9	-2.17995	-0.517	GEMIN8	gem nuclear organelle associated protein 8
ILMN_1681754	0.4802	0.00502512	2.88	-2.21103	0.866	GGH	gamma-glutamyl hydrolase
ILMN_1809590	0.4952	0.0068869	2.77	-2.44096	0.681	GINS2	GINS complex subunit 2
ILMN_1771962	0.5253	0.00981656	2.64	-2.69805	0.524	GLI3	GLI family zinc finger 3
ILMN_1735438	0.4622	0.00357327	3	-1.96111	0.629	GPM6B	glycoprotein M6B
ILMN_2168217	0.4622	0.00300512	-3.06	-1.83377	-0.799	GPR183	G protein-coupled receptor 183
ILMN_2232121	0.5241	0.00911363	-2.67	-2.6443	-0.55	GPR65	G protein-coupled receptor 65
ILMN_1761176	0.4871	0.00602266	-2.82	-2.34327	-0.636	GRIPAP1	GRIP1 associated protein 1
ILMN_1772064	0.4714	0.00439458	-2.93	-2.11289	-0.71	GSAP	gamma-secretase activating protein
ILMN_1785756	0.3821	0.00018322	3.92	0.24699	0.569	H2AFX	H2A histone family member X
ILMN_1721136	0.4437	0.00147595	-3.29	-1.3085	-0.563	H6PD	hexose-6-phosphate dehydrogenase/glucose 1-dehydrogenase
ILMN_1791771	0.4632	0.00370498	-2.99	-1.98769	-0.639	HCK	HCK proto-oncogene, Src family tyrosine kinase
ILMN_1684690	0.4795	0.00496051	-2.89	-2.20157	-0.546	HDAC11	histone deacetylase 11
ILMN_1792323	0.4576	0.00201727	-3.19	-1.53975	-0.893	HDC	histidine decarboxylase
ILMN_1702265	0.3821	0.00018324	-3.92	0.246906	-0.576	HDHD2	haloacid dehalogenase like hydrolase domain containing 2
ILMN_1741180	0.4635	0.00373499	-2.98	-1.99361	-0.936	HEXDC	hexosaminidase D
ILMN_1693853	0.4802	0.00538634	-2.86	-2.26177	-0.651	HHAT	hedgehog acyltransferase
ILMN_1703906	0.5115	0.00798261	2.72	-2.54825	0.779	HJURP	Holliday junction recognition protein
ILMN_1661266	0.4479	0.00162467	-3.26	-1.37962	-1.28	HLA-DQB1	major histocompatibility complex, class II, DQ beta 1
ILMN_2311537	0.4576	0.00256942	3.11	-1.71836	0.713	HMGA1	high mobility group AT-hook 1
ILMN_1781942	0.4687	0.00423604	2.94	-2.08597	0.801	HMMR	hyaluronan mediated motility receptor
ILMN_2409220	0.4802	0.00515546	2.87	-2.22976	0.816	HMMR	hyaluronan mediated motility receptor
ILMN_1760647	0.4887	0.00620815	2.81	-2.36539	0.631	HOXA3	homeobox A3
ILMN_1677018	0.4437	0.00144755	3.29	-1.2941	0.749	HOXA4	homeobox A4
ILMN_1735764	0.477	0.00471785	-2.9	-2.16487	-0.762	HTR2B	5-hydroxytryptamine receptor 2B
ILMN_1812226	0.477	0.00475738	-2.9	-2.17098	-0.786	ICAM1	intercellular adhesion molecule 1
ILMN_1700584	0.4576	0.00224166	-3.15	-1.61767	-0.588	IER2	immediate early response 2
ILMN_1811636	0.4576	0.00201555	-3.19	-1.53912	-0.798	IFT57	intraflagellar transport 57
ILMN_1684349	0.4802	0.00530437	-2.86	-2.25057	-0.772	IL2RB	interleukin 2 receptor subunit beta
ILMN_1749612	0.3821	0.00028845	3.78	-0.09254	0.59	IMMP1L	inner mitochondrial membrane peptidase subunit 1
ILMN_2355738	0.4622	0.00344091	3.01	-1.93337	0.659	INCENP	inner centromere protein
ILMN_1813117	0.5115	0.00802487	-2.72	-2.55208	-0.743	ITGA9	integrin subunit alpha 9
ILMN_1654396	0.4687	0.00428546	-2.94	-2.09447	-0.624	ITGB2	integrin subunit beta 2
ILMN_1778723	0.4663	0.00400214	-2.96	-2.04432	-0.645	JAML	junction adhesion molecule like
ILMN_1744897	0.4576	0.00230284	-3.14	-1.63755	-0.799	KCNN3	potassium calcium-activated channel subfamily N member 3
ILMN_1712505	0.4687	0.00412378	2.95	-2.06627	0.518	KDELC1	KDEL motif containing 1
ILMN_2158003	0.4802	0.00513574	-2.87	-2.22695	-0.815	KIAA1683	KIAA1683
ILMN_1794539	0.4479	0.00166238	3.25	-1.39661	0.782	KIF11	kinesin family member 11
ILMN_2143155	0.4622	0.00330024	3.03	-1.90269	0.808	KIF11	kinesin family member 11
ILMN_1753063	0.4576	0.00249941	3.12	-1.69799	0.794	KIF15	kinesin family member 15
ILMN_1695658	0.4622	0.00332922	3.02	-1.90912	0.845	KIF20A	kinesin family member 20A
ILMN_1811472	0.4232	0.00112939	3.37	-1.10995	0.873	KIF23	kinesin family member 23
ILMN_1694126	0.4622	0.00293027	3.07	-1.8152	0.714	KIF24	kinesin family member 24
ILMN_1735930	0.4887	0.00634627	-2.8	-2.38143	-0.529	KLF2	Kruppel like factor 2
ILMN_2064860	0.3989	0.00070411	3.52	-0.758545	1.16	LGALS7B	galectin 7B
ILMN_1825186	0.5222	0.00877532	2.68	-2.61691	0.584	LINC01252	long intergenic non-protein coding RNA 1252
ILMN_1846306	0.5241	0.00957049	-2.65	-2.67969	-0.81	LOC105379362	uncharacterized LOC105379362
ILMN_1764029	0.3876	0.00057367	-3.58	-0.605875	-0.509	LOC339059	uncharacterized LOC339059
ILMN_1778890	0.4576	0.00201796	3.19	-1.54001	0.508	LRR1	leucine rich repeat protein 1
ILMN_2314244	0.5091	0.00745812	-2.74	-2.4989	-0.582	LRRC23	leucine rich repeat containing 23
ILMN_1774389	0.4622	0.00284895	-3.07	-1.79447	-0.827	LRRC36	leucine rich repeat containing 36
ILMN_1669722	0.5222	0.00862929	2.69	-2.60475	0.5	LRRC61	leucine rich repeat containing 61
ILMN_2376204	0.3821	0.00044339	-3.66	-0.413707	-1.03	LTB	lymphotoxin beta
ILMN_2376205	0.4622	0.0027187	-3.09	-1.75999	-0.8	LTB	lymphotoxin beta
ILMN_2358074	0.3821	0.00028557	3.79	-0.085022	0.51	MAD1L1	MAD1 mitotic arrest deficient like 1
ILMN_1777564	0.4622	0.00287298	3.07	-1.80066	0.955	MAD2L1	MAD2 mitotic arrest deficient-like 1 (yeast)
ILMN_2241627	0.477	0.00458936	2.91	-2.14466	0.687	MAGEC1	MAGE family member C1
ILMN_1720041	0.4888	0.00651176	2.79	-2.40018	0.535	MAGEC1	MAGE family member C1
ILMN_2205032	0.4895	0.00657531	-2.79	-2.40725	-0.621	MAGEE1	MAGE family member E1
ILMN_1727360	0.5222	0.00889887	-2.68	-2.62703	-0.707	MAOB	monoamine oxidase B
ILMN_1797189	0.4802	0.00529074	-2.86	-2.24869	-0.525	MAP3K12	mitogen-activated protein kinase kinase kinase 12
ILMN_1665943	0.4887	0.00639798	-2.8	-2.38734	-0.624	MAP4K1	mitogen-activated protein kinase kinase kinase kinase 1
ILMN_1774132	0.4647	0.00378586	-2.98	-2.00355	-0.578	MAP6	microtubule associated protein 6
ILMN_2131493	0.4576	0.00213178	3.17	-1.58055	0.586	MAVS	mitochondrial antiviral signaling protein
ILMN_2409793	0.4622	0.00363691	2.99	-1.97407	0.732	MAZ	MYC associated zinc finger protein
ILMN_1762713	0.5241	0.00945398	-2.66	-2.67083	-1.02	MCEMP1	mast cell expressed membrane protein 1
ILMN_2413898	0.4622	0.00317315	3.04	-1.8738	0.838	MCM10	minichromosome maintenance 10 replication initiation factor
ILMN_2412860	0.3989	0.00077425	3.49	-0.829247	0.768	MCM4	minichromosome maintenance complex component 4
ILMN_1737205	0.4622	0.00309879	3.05	-1.85636	0.625	MCM4	minichromosome maintenance complex component 4
ILMN_1660462	0.3821	0.00040359	-3.69	-0.343486	-0.802	MCOLN2	mucolipin 2
ILMN_2212909	0.4576	0.0021182	3.17	-1.57583	1.02	MELK	maternal embryonic leucine zipper kinase
ILMN_2276811	0.4622	0.00318725	-3.04	-1.87707	-0.575	METTL17	methyltransferase like 17
ILMN_1734827	0.3099	6.507e-05	4.21	1.02259	0.893	MKI67	marker of proliferation Ki-67
ILMN_1795342	0.4622	0.00307695	-3.05	-1.85115	-0.86	MLPH	melanophilin
ILMN_1693702	0.4232	0.00115639	3.37	-1.1275	0.67	MRFAP1L1	Morf4 family associated protein 1 like 1
ILMN_1797731	0.4999	0.00716025	-2.76	-2.46927	-0.65	MS4A6A	membrane spanning 4-domains A6A
ILMN_1790906	0.499	0.00707161	2.76	-2.46021	1.07	MSMB	microseminoprotein beta
ILMN_2376313	0.5069	0.00731292	2.75	-2.48461	1.39	MSMB	microseminoprotein beta
ILMN_2373285	0.5222	0.0087706	-2.68	-2.61652	-0.638	MSR1	macrophage scavenger receptor 1
ILMN_1674706	0.4622	0.00264934	3.1	-1.74095	0.666	MTHFD2	methylenetetrahydrofolate dehydrogenase (NADP+ dependent) 2, methenyltetrahydrofolate cyclohydrolase
ILMN_2344650	0.5222	0.00871821	-2.69	-2.61217	-0.609	N4BP2L1	NEDD4 binding protein 2 like 1
ILMN_2315569	0.4622	0.00315958	-3.04	-1.87065	-0.57	N6AMT1	N-6 adenine-specific DNA methyltransferase 1 (putative)
ILMN_1751444	0.4802	0.0051063	2.88	-2.22275	0.785	NCAPG	non-SMC condensin I complex subunit G
ILMN_1796642	0.3989	0.00069943	-3.52	-0.753583	-0.753	NCF2	neutrophil cytosolic factor 2
ILMN_1785005	0.4622	0.00298093	-3.06	-1.82782	-0.72	NCF4	neutrophil cytosolic factor 4
ILMN_1664511	0.4802	0.00555342	2.85	-2.28408	0.674	NDC80	NDC80, kinetochore complex component
ILMN_1670535	0.5222	0.00892435	-2.68	-2.6291	-0.606	NDRG2	NDRG family member 2
ILMN_2310896	0.4802	0.00509671	-2.88	-2.22138	-0.664	NLRP3	NLR family pyrin domain containing 3
ILMN_1712026	0.525	0.00964883	-2.65	-2.68559	-0.61	NLRP3	NLR family pyrin domain containing 3
ILMN_1784783	0.427	0.00125991	-3.34	-1.19113	-0.836	NME5	NME/NM23 family member 5
ILMN_1762678	0.4301	0.0013308	-3.32	-1.23174	-0.533	NMT1	N-myristoyltransferase 1
ILMN_2184640	0.4622	0.0027377	3.09	-1.76513	0.561	NOLC1	nucleolar and coiled-body phosphoprotein 1
ILMN_1747067	0.477	0.00481939	-2.9	-2.18046	-0.644	NPAS1	neuronal PAS domain protein 1
ILMN_1735762	0.4622	0.00294855	-3.06	-1.81978	-0.832	NPNT	nephronectin
ILMN_1724479	0.4622	0.00327552	3.03	-1.89716	0.629	NR2C2	nuclear receptor subfamily 2 group C member 2
ILMN_1658247	0.5115	0.00817235	-2.71	-2.5653	-0.808	OAS1	2'-5'-oligoadenylate synthetase 1
ILMN_1665289	0.3821	0.00044663	-3.66	-0.419143	-0.595	OGFOD3	2-oxoglutarate and iron dependent oxygenase domain containing 3
ILMN_2196984	0.3821	0.00024052	3.84	0.043351	1.09	OIP5	Opa interacting protein 5
ILMN_1759277	0.3876	0.00054814	3.59	-0.57193	0.812	OIP5	Opa interacting protein 5
ILMN_1727459	0.4647	0.00388206	2.97	-2.02196	0.602	ORC1	origin recognition complex subunit 1
ILMN_1664094	0.4622	0.00308879	-3.05	-1.85398	-0.803	P2RY13	purinergic receptor P2Y13
ILMN_1768284	0.5191	0.00846336	-2.7	-2.59067	-0.59	P2RY8	purinergic receptor P2Y8
ILMN_1746618	0.4576	0.0025412	-3.11	-1.71022	-0.52	PAQR7	progestin and adipoQ receptor family member 7
ILMN_1814985	0.4687	0.00425828	2.94	-2.0898	0.546	PDLIM7	PDZ and LIM domain 7
ILMN_1734472	0.4871	0.00610566	-2.81	-2.35325	-1.03	PEBP4	phosphatidylethanolamine binding protein 4
ILMN_1704537	0.4758	0.00449464	2.92	-2.12939	0.949	PHGDH	phosphoglycerate dehydrogenase
ILMN_1766658	0.3099	5.181e-05	4.27	1.19344	1.11	PKMYT1	protein kinase, membrane associated tyrosine/threonine 1
ILMN_2401436	0.4622	0.00294503	3.06	-1.8189	0.617	PKMYT1	protein kinase, membrane associated tyrosine/threonine 1
ILMN_1810191	0.526	0.00992037	-2.64	-2.70565	-0.568	PLA2G4C	phospholipase A2 group IVC
ILMN_1786601	0.3821	0.00041642	3.68	-0.366855	0.515	PLAGL2	PLAG1 like zinc finger 2
ILMN_1806752	0.4876	0.00615397	-2.81	-2.359	-0.688	PLEKHH2	pleckstrin homology, MyTH4 and FERM domain containing H2
ILMN_1725145	0.3821	0.00024019	3.84	0.044393	0.504	POLA1	DNA polymerase alpha 1, catalytic subunit
ILMN_1728934	0.4622	0.00305866	3.05	-1.84676	0.678	PRC1	protein regulator of cytokinesis 1
ILMN_1780349	0.4895	0.00658857	-2.79	-2.40872	-1.05	PRG4	proteoglycan 4
ILMN_1674390	0.4576	0.0024034	3.13	-1.66909	0.821	PRKAR1B	protein kinase cAMP-dependent type I regulatory subunit beta
ILMN_1669781	0.5241	0.00954818	2.65	-2.67801	0.6	PRLR	prolactin receptor
ILMN_1671928	0.4805	0.00567822	-2.84	-2.30031	-0.61	PROS1	protein S (alpha)
ILMN_1782403	0.3846	0.0005029	3.62	-0.507689	0.95	PRR11	proline rich 11
ILMN_1692938	0.3821	0.00033018	3.75	-0.193524	1.03	PSAT1	phosphoserine aminotransferase 1
ILMN_1673553	0.4802	0.00554059	2.85	-2.28239	0.501	PTH2	parathyroid hormone 2
ILMN_1734543	0.5241	0.00921017	-2.67	-2.65193	-0.556	PTPRE	protein tyrosine phosphatase, receptor type E
ILMN_1788180	0.4622	0.00365986	-2.99	-1.9787	-0.584	RAB13	RAB13, member RAS oncogene family
ILMN_2052373	0.4576	0.00228026	-3.15	-1.63028	-0.744	RAB17	RAB17, member RAS oncogene family
ILMN_2255579	0.5115	0.00802241	-2.72	-2.55186	-0.889	RAB37	RAB37, member RAS oncogene family
ILMN_1748578	0.4232	0.00122076	3.35	-1.16771	0.615	RAD21	RAD21 cohesin complex component
ILMN_1721457	0.4622	0.00335231	3.02	-1.9142	0.503	RANBP1	RAN binding protein 1
ILMN_1790537	0.4105	0.00090046	3.44	-0.941604	0.615	RMI2	RecQ mediated genome instability 2
ILMN_1854349	0.4632	0.00371091	-2.99	-1.98887	-0.5	RNF217	ring finger protein 217
ILMN_1808041	0.4905	0.00668393	2.78	-2.41918	0.632	RPL10A	ribosomal protein L10a
ILMN_1749234	0.526	0.00995132	-2.64	-2.7079	-0.509	RPL13AP17	ribosomal protein L13a pseudogene 17
ILMN_1652736	0.4501	0.00174205	-3.24	-1.43127	-0.625	RPS6KA3	ribosomal protein S6 kinase A3
ILMN_2186137	0.4802	0.00524964	-2.87	-2.24299	-1.03	RRAD	RRAD, Ras related glycolysis inhibitor and calcium channel regulator
ILMN_1689212	0.4687	0.00416827	-2.95	-2.07414	-0.786	RSPH4A	radial spoke head 4 homolog A
ILMN_2262901	0.4015	0.00081332	-3.47	-0.86589	-0.633	RUFY3	RUN and FYVE domain containing 3
ILMN_1810037	0.4895	0.00661439	-2.79	-2.41157	-0.539	RUSC2	RUN and SH3 domain containing 2
ILMN_1783131	0.5241	0.00941094	2.66	-2.66753	0.504	SAMD13	sterile alpha motif domain containing 13
ILMN_1702197	0.4687	0.00409439	2.95	-2.06103	0.882	SAPCD2	suppressor APC domain containing 2
ILMN_2412822	0.4437	0.00145861	3.29	-1.29974	0.52	SCN3B	sodium voltage-gated channel beta subunit 3
ILMN_1815308	0.5115	0.00784568	-2.72	-2.53569	-0.527	SDC1	syndecan 1
ILMN_1665538	0.492	0.00676282	2.78	-2.42772	0.533	SKP2	S-phase kinase-associated protein 2, E3 ubiquitin protein ligase
ILMN_1739751	0.5091	0.00742769	-2.74	-2.49593	-0.508	SLC26A11	solute carrier family 26 member 11
ILMN_1719627	0.5182	0.00840484	-2.7	-2.58564	-0.568	SLC27A3	solute carrier family 27 member 3
ILMN_1723287	0.4622	0.00354911	-3	-1.95612	-0.6	SLC6A16	solute carrier family 6 member 16
ILMN_1777637	0.4232	0.00120462	-3.35	-1.15783	-0.844	SLFNL1	schlafen like 1
ILMN_1748923	0.4833	0.00578303	2.83	-2.31365	0.527	SMC2	structural maintenance of chromosomes 2
ILMN_1787326	0.3876	0.00061972	3.56	-0.663427	0.62	SNORA65	small nucleolar RNA, H/ACA box 65
ILMN_2082762	0.5094	0.00761237	2.74	-2.51377	0.627	SNORD68	small nucleolar RNA, C/D box 68
ILMN_1786766	0.4802	0.00528775	2.86	-2.24827	0.517	SNTB2	syntrophin beta 2
ILMN_1798615	0.3662	0.00010762	4.07	0.645471	1	SOHLH2	spermatogenesis and oogenesis specific basic helix-loop-helix 2
ILMN_1757845	0.4576	0.00229996	-3.15	-1.63663	-0.52	SPIRE1	spire type actin nucleation factor 1
ILMN_1772241	0.4622	0.00341158	3.01	-1.92708	0.68	SQLE	squalene epoxidase
ILMN_2361163	0.477	0.00467157	2.91	-2.15766	0.823	SSBP3	single stranded DNA binding protein 3
ILMN_2247572	0.4501	0.00176124	3.23	-1.43937	0.87	SSX1	SSX family member 1
ILMN_1799600	0.4622	0.00320007	-3.04	-1.88002	-0.593	STARD8	StAR related lipid transfer domain containing 8
ILMN_1657796	0.4501	0.00176227	3.23	-1.43981	0.69	STMN1	stathmin 1
ILMN_1681601	0.4871	0.00596136	-2.82	-2.33581	-0.744	SUCNR1	succinate receptor 1
ILMN_1785570	0.5222	0.00893393	-2.68	-2.62988	-0.552	SUSD3	sushi domain containing 3
ILMN_2407703	0.4802	0.00538012	2.86	-2.26093	0.911	SYN1	synapsin I
ILMN_1712075	0.4622	0.00308979	-3.05	-1.85422	-0.567	SYNM	synemin
ILMN_1710434	0.5241	0.00943125	-2.66	-2.66909	-0.509	TBC1D10C	TBC1 domain family member 10C
ILMN_2391789	0.4181	0.00098639	3.42	-1.00937	0.525	TDP1	tyrosyl-DNA phosphodiesterase 1
ILMN_1654570	0.4958	0.00695517	-2.77	-2.44813	-0.842	TEKT1	tektin 1
ILMN_2336094	0.5115	0.00793475	2.72	-2.54389	0.969	TENM3	teneurin transmembrane protein 3
ILMN_1694847	0.4622	0.00266704	3.1	-1.74586	0.567	TERF1	telomeric repeat binding factor 1
ILMN_1674662	0.4576	0.00196465	3.2	-1.52021	0.649	TICRR	TOPBP1 interacting checkpoint and replication regulator
ILMN_1806037	0.5241	0.00954517	2.65	-2.67778	0.675	TK1	thymidine kinase 1
ILMN_1688848	0.4294	0.00130428	-3.33	-1.21681	-0.699	TMEM44	transmembrane protein 44
ILMN_1728106	0.3989	0.00078703	-3.48	-0.841434	-0.809	TNF	tumor necrosis factor
ILMN_1699265	0.4576	0.00201512	-3.19	-1.53897	-0.545	TNFRSF10B	TNF receptor superfamily member 10b
ILMN_1812915	0.5115	0.00795966	-2.72	-2.54616	-0.523	TNFRSF10B	TNF receptor superfamily member 10b
ILMN_1666022	0.4871	0.0059613	-2.82	-2.33581	-0.596	TNFRSF10D	TNF receptor superfamily member 10d
ILMN_1796949	0.4501	0.00185734	3.21	-1.47868	0.969	TPX2	TPX2, microtubule nucleation factor
ILMN_2405991	0.3821	0.00035743	3.72	-0.252782	0.614	TRAF7	TNF receptor associated factor 7
ILMN_2404665	0.4576	0.00229201	-3.15	-1.63407	-0.531	TRIM5	tripartite motif containing 5
ILMN_1718621	0.477	0.00473694	-2.9	-2.16783	-0.79	TSPAN32	tetraspanin 32
ILMN_1788166	0.4576	0.00205378	3.18	-1.55301	0.896	TTK	TTK protein kinase
ILMN_2301083	0.5091	0.00751125	2.74	-2.50406	1	UBE2C	ubiquitin conjugating enzyme E2 C
ILMN_1785179	0.4622	0.00289385	-3.07	-1.80599	-0.508	UBE2G2	ubiquitin conjugating enzyme E2 G2
ILMN_2084073	0.4722	0.00441191	-2.93	-2.11578	-0.708	UCN	urocortin
ILMN_1786065	0.4622	0.00277488	3.08	-1.77506	0.836	UHRF1	ubiquitin like with PHD and ring finger domains 1
ILMN_1664698	0.4775	0.00484369	-2.89	-2.18414	-0.691	UNC119	unc-119 lipid binding chaperone
ILMN_1669747	0.3821	0.00038672	-3.7	-0.311594	-0.804	UNC13B	unc-13 homolog B
ILMN_1721116	0.3876	0.00060821	3.56	-0.649457	0.505	USP10	ubiquitin specific peptidase 10
ILMN_1805828	0.4453	0.00153673	3.28	-1.3384	0.651	VRK1	vaccinia related kinase 1
ILMN_1764769	0.5229	0.0089573	-2.68	-2.63177	-0.539	VWA5A	von Willebrand factor A domain containing 5A
ILMN_1688160	0.525	0.00963441	-2.65	-2.68451	-0.582	WDR27	WD repeat domain 27
ILMN_1745852	0.5115	0.00793254	-2.72	-2.54368	-0.502	WDR33	WD repeat domain 33
ILMN_2279873	0.3099	5.359e-05	-4.26	1.16817	-0.73	WHAMM	WAS protein homolog associated with actin, golgi membranes and microtubules
ILMN_1743711	0.4622	0.00313975	3.04	-1.86602	0.646	XPOT	exportin for tRNA
ILMN_1696266	0.4479	0.00162575	3.26	-1.38011	0.573	XRCC3	X-ray repair cross complementing 3
ILMN_2411127	0.4576	0.00223749	-3.15	-1.6163	-0.713	YBEY	ybeY metallopeptidase (putative)
ILMN_1694514	0.4687	0.00415553	-2.95	-2.0719	-1.03	ZDHHC11	zinc finger DHHC-type containing 11
ILMN_2343036	0.4622	0.00323417	3.03	-1.88782	0.5	ZMYM5	zinc finger MYM-type containing 5
ILMN_1656504	0.3876	0.00060596	-3.56	-0.646696	-0.525	ZNF304	zinc finger protein 304
ILMN_1657087	0.4659	0.00393276	-2.97	-2.03149	-1.46	ZNF385B	zinc finger protein 385B
ILMN_1713454	0.4895	0.00660307	-2.79	-2.41032	-0.58	ZNF671	zinc finger protein 671
ILMN_1715718	0.4802	0.00557021	-2.85	-2.28629	-0.539	ZNF784	zinc finger protein 784
ILMN_1773868	0.5241	0.00941206	-2.66	-2.66762	-0.512	ZRSR2	zinc finger CCCH-type, RNA binding motif and serine/arginine rich 2
ILMN_2362549	0.4622	0.00342225	3.01	-1.92938	0.745	ZWINT	ZW10 interacting kinetochore protein
ILMN_1684168	0.3099	7.266e-05	-4.18	0.939911	-0.534
ILMN_1741648	0.3821	0.00034999	-3.73	-0.23706	-1.85
ILMN_1893679	0.3821	0.00038118	-3.7	-0.300817	-1.01
ILMN_1702783	0.3876	0.00062745	3.55	-0.672673	0.638
ILMN_2405521	0.3989	0.00073206	3.51	-0.787535	0.805
ILMN_1872457	0.4015	0.00082266	-3.47	-0.874386	-0.807
ILMN_1856533	0.4105	0.00092675	-3.43	-0.963007	-1.25
ILMN_2281734	0.4232	0.00113535	-3.37	-1.11386	-0.624
ILMN_1679867	0.4232	0.00115767	3.37	-1.12832	0.615
ILMN_1703229	0.4437	0.00148536	3.29	-1.31321	0.518
ILMN_1664912	0.4479	0.00167043	-3.25	-1.40019	-0.577
ILMN_1724064	0.4576	0.0020902	3.18	-1.566	0.652
ILMN_2390310	0.4576	0.00212677	-3.17	-1.57881	-0.696
ILMN_1686852	0.4576	0.00216516	3.16	-1.59203	0.523
ILMN_1784706	0.4576	0.00236703	-3.14	-1.65784	-0.985
ILMN_1693804	0.4576	0.00244403	3.13	-1.68146	0.564
ILMN_2090040	0.4622	0.00266645	-3.1	-1.74569	-0.503
ILMN_1683552	0.4622	0.00312798	3.04	-1.86326	0.533
ILMN_1773952	0.4622	0.00350596	3	-1.94714	0.77
ILMN_1659365	0.4622	0.00361268	2.99	-1.96916	0.842
ILMN_1714730	0.4622	0.00363882	2.99	-1.97446	1.1
ILMN_1795089	0.4635	0.00374835	-2.98	-1.99624	-0.651
ILMN_1678300	0.4647	0.00380383	2.98	-2.00702	0.547
ILMN_1735877	0.4659	0.00393099	-2.97	-2.03116	-0.713
ILMN_1663142	0.4687	0.00420508	-2.94	-2.08059	-0.709
ILMN_2389970	0.477	0.00462072	-2.91	-2.14964	-0.564
ILMN_1874815	0.477	0.00478323	-2.9	-2.17494	-0.627
ILMN_1790315	0.4802	0.00501573	-2.88	-2.20967	-0.588
ILMN_1768798	0.4802	0.00539018	-2.86	-2.26229	-0.515
ILMN_1683096	0.4805	0.00571532	-2.84	-2.30506	-0.526
ILMN_1689336	0.4871	0.00604445	2.82	-2.34591	0.991
ILMN_1697665	0.492	0.00675406	2.78	-2.42678	0.526
ILMN_1912083	0.5094	0.00763089	-2.73	-2.51553	-0.815
ILMN_1681260	0.5094	0.00769436	2.73	-2.52155	0.526
ILMN_1671442	0.5115	0.00791739	2.72	-2.5423	0.572
ILMN_1699521	0.5241	0.00938029	-2.66	-2.66517	-0.889
ILMN_1754757	0.5241	0.0095639	-2.65	-2.6792	-0.726
