# Supplementary material for: CKS2 and RMI2 are two prognostic biomarkers of lung adenocarcinoma
Source: PeerJ. 2020 Oct 7;8:e10126. doi: 10.7717/peerj.10126 (PMC7547618; doi:10.7717/peerj.10126)
Supplement: Supplemental Information 4 [file peerj-08-10126-s004.xlsx]

## Sheet: Sheet1
Normal	Cancer	Sex	Age
1	1.757	male	49
1	1.808	female	76
1	1.435	female	56
1	2.68	male	45
1	3.01	female	66
1	5.98	male	68
1	4.56	male	63
1	1.97	male	64
1	1.53	female	61
1	1.95	male	54
1	2.76	female	66
1	1.24	female	65
1	1.53	male	68
1	2.987	female	64
1	0.45	female	62
1	1.67	male	50
1	2.63	female	57
1	0.77	male	49
1	1.856	female	70
1	1.654	female	60
1	1.275	male	65
1	1.645	female	67
1	1.431	female	65
1	2.943	male	63
1	2.219	male	68
1	1.32	male	70
1	2.965	female	76
1	1.632	female	66
1	1.431	male	65
1	0.979	male	52
1	0.721	female	62
1	0.721	male	55
1	1.545	female	59
1	1.683	male	57
1	1.513	male	50
1	1.311	female	53
1	1.982	female	68
1	0.932	male	62
1	0.669	female	60
1	0.722	female	65
1	1.431	male	51
1	1.129	male	66
1	1.134	female	62
1	1.542	male	61
1	2.998	female	58
1	2.987	male	60
1	3.678	male	54
1	0.421	male	59
1	0.798	female	66
1	1.887	male	54
1	1.5345	female	55
1	2.982	male	62
1	2.334	male	61
1	2.932	female	66
1	1.9844	male	53
1	2.632	male	63
1	1.96	female	66
1	2.343	male	63
1	1.431	male	62
1	1.411	female	70
1	3.8743	male	50
1	0.7872	male	60
1	3.998	female	55
1	2.963	female	47
1	1.6566	female	50
1	1.9321	male	53
1	0.973	female	54
1	1.4345	male	78
1	1.111	male	51
1	2.8873	male	56
1	1.676	female	61
1	2.2911	male	60.3944

## Sheet: Sheet2
Lymphatic metastasis positive	Lymphatic metastasis negative
1.657	1.029
1.908	1.034
1.235	1.342
2.98	2.998
3.41	1.987
4.98	3.678
4.26	0.321
0.97	0.998
1.23	1.587
1.65	1.3345
2.56	1.982
1.94	2.234
1.43	2.932
1.987	1.9844
1.45	2.832
0.67	1.76
2.43	2.643
0.87	1.231
1.56	1.211
1.454	3.8743
1.875	0.9872
1.345	3.998
1.231	2.763
1.943	1.4566
2.019	1.8321
1.82	0.873
2.765	1.2345
1.432	1.211
1.231	2.9873
0.879	1.876
0.921	2.0911
0.821
1.345
1.783
1.213
1.211
1.982
0.732
0.569
0.822
1.231

## Sheet: Sheet3
＜3cm	≥3cm
1.757	2.965
1.808	1.632
1.435	1.431
0.721	2.63
1.545	2.68
1.67	4.56
0.721	3.01
0.798	5.98
1.53	1.513
1.95	1.311
0.669	1.982
1.24	0.932
1.53	2.76
0.722	2.987
0.45	1.431
1.67	1.129
0.979	1.134
0.77	1.542
1.856	2.998
1.654	2.987
1.275	3.678
1.645	2.943
1.431	1.97
0.421	1.887
2.219	1.5345
1.32	2.982
	2.334
	2.932
	1.9844
	2.632
	1.96
	2.343
	1.431
	1.411
	3.8743
	0.7872
	3.998
	2.963
	1.6566
	1.9321
	0.973
	1.4345
	1.111
	2.8873
	1.676
	2.2911

## Sheet: Sheet4
Metastasis positive	Metastasis negative
1.97	1.757
1.53	1.808
1.95	1.435
2.76	2.68
	3.01
	5.98
	4.56
	1.24
	1.53
	2.987
	0.45
	1.67
	2.63
	0.77
	1.856
	1.654
	1.275
	1.645
	1.431
	2.943
	2.219
	1.32
	2.965
	1.632
	1.431
	0.979
	0.721
	0.721
	1.545
	1.683
	1.513
	1.311
	1.982
	0.932
	0.669
	0.722
	1.431
	1.129
	1.134
	1.542
	2.998
	2.987
	3.678
	0.421
	0.798
	1.887
	1.5345
	2.982
	2.334
	2.932
	1.9844
	2.632
	1.96
	2.343
	1.431
	1.411
	3.8743
	0.7872
	3.998
	2.963
	1.6566
	1.9321
	0.973
	1.4345
	1.111
	2.8873
	1.676
	2.2911

## Sheet: Sheet5
Normal	Cancer	Sex	Age
1	1.657	male	49
1	1.408	female	76
1	1.135	female	56
1	2.38	male	45
1	3.51	female	66
1	4.68	male	68
1	4.06	male	63
1	1.77	male	64
1	1.33	female	61
1	1.85	male	54
1	2.76	female	66
1	1.44	female	65
1	1.33	male	68
1	2.987	female	64
1	0.55	female	62
1	1.37	male	50
1	2.83	female	57
1	0.67	male	49
1	1.556	female	70
1	1.954	female	60
1	1.575	male	65
1	1.445	female	67
1	1.831	female	65
1	2.743	male	63
1	2.419	male	68
1	1.52	male	70
1	2.765	female	76
1	1.432	female	66
1	1.231	male	65
1	1.979	male	52
1	1.721	female	62
1	0.521	male	55
1	1.245	female	59
1	1.883	male	57
1	1.413	male	50
1	1.211	female	53
1	2.982	female	68
1	0.732	male	62
1	0.569	female	60
1	0.622	female	65
1	1.231	male	51
1	1.329	male	66
1	1.534	female	62
1	1.242	male	61
1	2.798	female	58
1	2.587	male	60
1	3.878	male	54
1	0.421	male	59
1	0.708	female	66
1	1.687	male	54
1	1.6345	female	55
1	2.682	male	62
1	2.834	male	61
1	2.632	female	66
1	1.9844	male	53
1	2.332	male	63
1	1.76	female	66
1	2.143	male	63
1	1.631	male	62
1	1.611	female	70
1	3.6743	male	50
1	0.6872	male	60
1	3.698	female	55
1	3.963	female	47
1	1.2566	female	50
1	1.5321	male	53
1	1.973	female	54
1	1.4345	male	78
1	1.211	male	51
1	1.8873	male	56
1	1.676	female	61
1	2.2911	male	60.3944

## Sheet: Sheet6
＜3cm	≥3cm
1.657	2.765
1.408	1.432
1.135	1.231
2.38	1.979
1.721	3.51
0.521	4.68
1.245	4.06
1.77	1.883
1.33	1.413
1.85	1.211
2.76	2.982
1.44	0.732
1.33	0.569
0.622	2.987
0.55	1.231
1.37	1.329
0.421	1.534
0.67	1.242
1.556	2.798
1.954	2.587
1.575	3.878
1.445	2.83
1.831	2.743
0.708	1.687
2.419	1.6345
1.52	2.682
	2.834
	2.632
	1.9844
	2.332
	1.76
	2.143
	1.631
	1.611
	3.6743
	0.6872
	3.698
	3.963
	1.2566
	1.5321
	1.973
	1.4345
	1.211
	1.8873
	1.676
	2.2911

## Sheet: Sheet7
Lymphatic metastasis positive	Lymphatic metastasis negative
0.521	1.657
1.245	1.408
1.883	1.135
1.413	2.38
1.211	3.51
2.982	4.68
0.732	4.06
0.569	1.77
0.622	1.33
1.231	1.85
1.329	2.76
1.534	1.44
1.242	1.33
2.798	2.987
2.587	0.55
3.878	1.37
0.421	2.83
0.708	0.67
1.687	1.556
1.6345	1.954
2.682	1.575
2.834	1.445
2.632	1.831
1.9844	2.743
2.332	2.419
1.76	1.52
2.143	2.765
1.631	1.432
1.611	1.231
3.6743	1.979
0.6872	1.721
3.698
3.963
1.2566
1.5321
1.973
1.4345
1.211
1.8873
1.676
2.2911

## Sheet: Sheet8
Metastasis positive	Metastasis negative
1.445	1.657
1.831	1.408
2.743	1.135
2.419	2.38
	3.51
	4.68
	4.06
	1.77
	1.33
	1.85
	2.76
	1.44
	1.33
	2.987
	0.55
	1.37
	2.83
	0.67
	1.556
	1.954
	1.575
	1.52
	2.765
	1.432
	1.231
	1.979
	1.721
	0.521
	1.245
	1.883
	1.413
	1.211
	2.982
	0.732
	0.569
	0.622
	1.231
	1.329
	1.534
	1.242
	2.798
	2.587
	3.878
	0.421
	0.708
	1.687
	1.6345
	2.682
	2.834
	2.632
	1.9844
	2.332
	1.76
	2.143
	1.631
	1.611
	3.6743
	0.6872
	3.698
	3.963
	1.2566
	1.5321
	1.973
	1.4345
	1.211
	1.8873
	1.676
	2.2911
