# Supplementary material for: CKS2 and RMI2 are two prognostic biomarkers of lung adenocarcinoma
Source: PeerJ. 2020 Oct 7;8:e10126. doi: 10.7717/peerj.10126 (PMC7547618; doi:10.7717/peerj.10126)
Supplement: Supplemental Information 5 [file peerj-08-10126-s005.xlsx]

## Sheet: KEGG
Category	Term	Count				PValue
KEGG_PATHWAY	Cell cycle	7	7			8.63654e-08
KEGG_PATHWAY	Progesterone-mediated oocyte maturation	5	4.6			2.23098e-05
KEGG_PATHWAY	Oocyte meiosis	4	2.9			0.00127526

## Sheet: BP
Category	Term	Count				PValue
GOTERM_BP_DIRECT	positive regulation of exit from mitosis	3	4.4			4.26544e-05	-4.37004
GOTERM_BP_DIRECT	DNA replication initiation	3	3.1			0.000877327	-3.05684
GOTERM_BP_DIRECT	cytokinesis	3	2.9			0.00114858	-2.93984
GOTERM_BP_DIRECT	chromosome segregation	3	2.4			0.00383612	-2.41611
GOTERM_BP_DIRECT	spindle checkpoint	2	2.2			0.00631782	-2.19943
GOTERM_BP_DIRECT	double-strand break repair via break-induced replication	2	2.1			0.00841521	-2.07493
GOTERM_BP_DIRECT	mitotic cell cycle phase transition	2	2.1			0.00841521	-2.07493
GOTERM_BP_DIRECT	protein localization to kinetochore	2	1.7			0.0209105	-1.67964
GOTERM_BP_DIRECT	mitotic chromosome condensation	2	1.6			0.0229783	-1.63868
GOTERM_BP_DIRECT	cell proliferation	3	1.6			0.0262519	-1.58084
GOTERM_BP_DIRECT	mitotic sister chromatid segregation	2	1.4			0.0373355	-1.42788
GOTERM_BP_DIRECT	microtubule bundle formation	2	1.4			0.0414002	-1.383
GOTERM_BP_DIRECT	regulation of mitotic cell cycle	2	1.4			0.0434263	-1.36225
GOTERM_BP_DIRECT	mitotic spindle assembly	2	1.3			0.0514898	-1.28828
GOTERM_BP_DIRECT	mitotic metaphase plate congression	2	1.3			0.0534955	-1.27168
GOTERM_BP_DIRECT	G2/M transition of mitotic cell cycle	2	1.3			0.0534955	-1.27168
GOTERM_BP_DIRECT	negative regulation of apoptotic process	3	1.2			0.068972	-1.16133
GOTERM_BP_DIRECT	G1/S transition of mitotic cell cycle	2	1.1			0.0811497	-1.09071
GOTERM_BP_DIRECT	cell division	2	1			0.0927622	-1.03263
