# Supplementary material for: CKS2 and RMI2 are two prognostic biomarkers of lung adenocarcinoma
Source: PeerJ. 2020 Oct 7;8:e10126. doi: 10.7717/peerj.10126 (PMC7547618; doi:10.7717/peerj.10126)
Supplement: Supplemental Information 6 [file peerj-08-10126-s006.xls]

## Sheet: by cmap name
rank	cmap name	mean	n	enrichment	p	specificity	percent non-null
1	phenoxybenzamine	-0.775	4	-0.955	0	0.0091	100
2	adiphenine	0.746	5	0.946	0	0	100
3	resveratrol	-0.756	9	-0.887	0	0	100
4	trifluoperazine	-0.513	16	-0.552	0	0.0577	75
5	prochlorperazine	-0.543	16	-0.549	0	0.0377	93
6	trichostatin A	-0.412	182	-0.33	0	0.4654	73
7	estradiol	0.218	37	0.375	4e-05	0.044	51
8	acepromazine	-0.744	4	-0.916	0.0001	0	100
9	pentoxifylline	0.632	5	0.852	0.00018	0	100
10	medrysone	-0.714	6	-0.784	0.00018	0.0108	100
11	0175029-0000	-0.669	6	-0.781	0.00018	0.0352	100
12	menadione	-0.854	2	-0.992	0.00022	0	100
13	apigenin	-0.743	4	-0.893	0.00026	0.0163	100
14	pyrvinium	-0.732	6	-0.77	0.00026	0.0309	100
15	vinburnine	0.669	4	0.874	0.00034	0	100
16	cloperastine	-0.664	6	-0.734	0.0007	0.0252	100
17	fludrocortisone	0.525	8	0.66	0.0007	0.0235	87
18	tranexamic acid	0.57	5	0.782	0.00104	0.0061	100
19	Prestwick-692	0.617	4	0.835	0.00115	0.0303	100
20	viomycin	0.657	4	0.834	0.00115	0.0231	100
21	timolol	0.625	4	0.832	0.00119	0.0056	100
22	atractyloside	0.59	5	0.775	0.00124	0.0167	80
23	nadolol	0.603	4	0.825	0.00151	0.0165	100
24	alpha-estradiol	-0.448	16	-0.453	0.00164	0.071	87
25	sulfadimethoxine	0.341	5	0.765	0.00168	0.0226	60
26	PHA-00745360	0.265	8	0.621	0.00177	0.0656	50
27	MS-275	-0.768	2	-0.97	0.00185	0.0988	100
28	methacholine chloride	-0.709	3	-0.899	0.00194	0	100
29	trimethobenzamide	0.46	5	0.756	0.00206	0.0184	80
30	dapsone	0.49	5	0.755	0.00214	0	80
31	cinchonine	0.647	4	0.799	0.00312	0.04	100
32	thioperamide	0.353	5	0.724	0.00366	0.0225	60
33	LY-294002	-0.346	61	-0.224	0.00371	0.5522	67
34	heptaminol	0.562	5	0.723	0.00372	0.0663	80
35	genistein	0.185	17	0.414	0.00378	0.1221	52
36	aciclovir	0.332	6	0.667	0.00381	0.0062	50
37	gentamicin	0.614	4	0.786	0.00402	0.0063	100
38	fluspirilene	-0.704	4	-0.789	0.00406	0.0354	100
39	ondansetron	0.471	4	0.78	0.00442	0.0168	100
40	ribavirin	0.525	4	0.778	0.00458	0.0125	100
41	felbinac	0.553	4	0.777	0.00464	0.0292	100
42	bepridil	-0.721	4	-0.779	0.00497	0.0303	100
43	trifluridine	-0.649	4	-0.777	0.00511	0.0246	100
44	vigabatrin	0.679	3	0.859	0.00531	0.0177	100
45	pentoxyverine	-0.631	4	-0.774	0.00533	0.0051	100
46	ellipticine	-0.592	4	-0.773	0.00539	0.0382	100
47	thioridazine	-0.431	20	-0.372	0.00579	0.3118	70
48	etiocholanolone	0.407	6	0.642	0.00612	0.0696	66
49	vinblastine	0.659	3	0.85	0.00631	0.0387	100
50	beta-escin	-0.567	6	-0.636	0.00683	0.0331	100
51	15-delta prostaglandin J2	-0.49	15	-0.417	0.00683	0.2181	73
52	vancomycin	0.395	4	0.755	0.00686	0.006	75
53	vorinostat	-0.464	12	-0.462	0.00688	0.4602	75
54	gliclazide	-0.617	4	-0.755	0.00732	0.02	100
55	3-acetamidocoumarin	0.569	4	0.749	0.00762	0.0823	75
56	sulconazole	-0.711	4	-0.751	0.00772	0.0132	100
57	puromycin	-0.697	4	-0.749	0.0079	0.0896	100
58	dipyridamole	-0.554	6	-0.629	0.00806	0.0368	83
59	etoposide	-0.795	4	-0.745	0.00837	0.0769	100
60	2-aminobenzenesulfonamide	0.435	4	0.742	0.00847	0.0119	75
61	chenodeoxycholic acid	0.359	4	0.74	0.00875	0.044	50
62	vincamine	0.46	6	0.623	0.00878	0.0493	83
63	skimmianine	-0.626	4	-0.741	0.00891	0.0263	100
64	diclofenamide	0.409	4	0.737	0.00939	0.007	75
65	Prestwick-857	0.481	4	0.736	0.00949	0.0516	75
66	eucatropine	-0.564	6	-0.62	0.00965	0.0781	100
67	luteolin	-0.677	4	-0.734	0.00999	0.04	100
68	daunorubicin	-0.708	4	-0.731	0.0105	0.1053	100
69	quinpirole	0.498	4	0.728	0.01088	0.0226	75
70	repaglinide	-0.634	4	-0.727	0.01134	0.0441	100
71	methotrexate	-0.509	8	-0.533	0.01183	0.0753	75
72	imipramine	-0.647	4	-0.723	0.01204	0.0146	100
73	8-azaguanine	-0.579	4	-0.719	0.01259	0.0769	75
74	Prestwick-691	0.583	3	0.815	0.0127	0.0375	100
75	cephaeline	-0.58	5	-0.649	0.01302	0.3253	100
76	lisuride	0.38	5	0.656	0.01314	0.1526	80
77	Prestwick-642	0.371	4	0.715	0.01329	0.0659	50
78	podophyllotoxin	0.373	4	0.715	0.01335	0.1381	50
79	naringenin	0.472	4	0.714	0.01349	0.1011	75
80	astemizole	-0.618	5	-0.646	0.01368	0.1287	100
81	clioquinol	-0.645	5	-0.645	0.01402	0.0248	100
82	fluphenazine	-0.452	18	-0.36	0.01451	0.1765	77
83	tyloxapol	-0.672	4	-0.71	0.01456	0.0842	100
84	clorsulon	0.407	4	0.699	0.01693	0.0702	50
85	methyldopate	0.457	4	0.698	0.01719	0.0171	75
86	guanabenz	0.512	5	0.64	0.01734	0.1044	80
87	biperiden	0.543	5	0.639	0.01746	0.2121	80
88	0179445-0000	-0.424	8	-0.513	0.01787	0.0405	75
89	promethazine	-0.642	4	-0.696	0.01814	0.0655	100
90	benzathine benzylpenicillin	0.513	4	0.695	0.01818	0.0571	75
91	clotrimazole	-0.435	5	-0.627	0.01864	0.0606	80
92	chlorpromazine	-0.413	19	-0.339	0.01887	0.1026	68
93	milrinone	-0.636	3	-0.79	0.01893	0.0376	100
94	iohexol	0.496	4	0.69	0.01932	0.0514	75
95	econazole	-0.587	4	-0.686	0.02095	0.1111	100
96	nortriptyline	-0.547	4	-0.685	0.02127	0.0584	75
97	trimetazidine	-0.55	4	-0.685	0.02152	0.1141	100
98	cefalexin	-0.584	5	-0.618	0.02219	0.1323	100
99	Prestwick-1082	0.395	3	0.775	0.02299	0.0895	66
100	iproniazid	0.333	5	0.621	0.02299	0.0726	60
101	isoflupredone	0.514	3	0.773	0.02338	0.1406	66
102	tretinoin	-0.448	22	-0.308	0.02366	0.2279	77
103	furazolidone	0.318	4	0.677	0.02379	0.0839	50
104	levopropoxyphene	0.392	4	0.677	0.02395	0.0063	75
105	GW-8510	-0.583	4	-0.677	0.02407	0.3588	100
106	5248896	-0.801	2	-0.89	0.0241	0.0197	100
107	(+)-chelidonine	0.374	4	0.672	0.0252	0.0275	75
108	thiostrepton	-0.671	4	-0.67	0.0265	0.1482	100
109	acemetacin	0.414	4	0.669	0.02654	0.0506	75
110	thiamphenicol	0.495	5	0.61	0.02687	0.2901	80
111	sanguinarine	-0.723	2	-0.884	0.02696	0.05	100
112	deferoxamine	-0.42	8	-0.49	0.02702	0.0736	87
113	amantadine	0.461	4	0.667	0.02751	0.1006	75
114	mafenide	0.36	5	0.609	0.02752	0.0621	80
115	trazodone	-0.653	3	-0.762	0.0276	0.1067	100
116	sulfamonomethoxine	0.415	4	0.666	0.02787	0.0621	75
117	etynodiol	0.297	4	0.665	0.02823	0.0683	50
118	pyrithyldione	0.507	4	0.665	0.02839	0.0471	75
119	josamycin	0.3	5	0.606	0.0287	0.0988	60
120	guanfacine	-0.523	5	-0.6	0.02916	0.0497	80
121	betulinic acid	0.371	4	0.662	0.02982	0.0573	75
122	calcium folinate	0.336	5	0.604	0.02988	0.2431	60
123	pivmecillinam	0.373	4	0.659	0.03105	0.0305	75
124	diphenylpyraline	0.193	6	0.55	0.03144	0.0395	50
125	felodipine	-0.556	7	-0.509	0.03172	0.1182	85
126	oxetacaine	-0.544	5	-0.594	0.03186	0.034	100
127	miconazole	-0.614	5	-0.594	0.03198	0.062	100
128	blebbistatin	-0.745	2	-0.873	0.03217	0.0608	100
129	chloropyrazine	0.331	4	0.656	0.03223	0.1013	50
130	camptothecin	-0.652	3	-0.747	0.03275	0.2955	100
131	merbromin	0.351	5	0.596	0.03298	0.1534	60
132	clemizole	-0.511	5	-0.591	0.03308	0.068	80
133	cortisone	-0.616	3	-0.746	0.03323	0.0314	100
134	Prestwick-559	-0.617	3	-0.744	0.03405	0.0727	100
135	ketotifen	0.538	4	0.651	0.03499	0.0737	75
136	gabexate	0.338	4	0.65	0.03553	0.0949	50
137	diloxanide	0.36	4	0.649	0.03591	0.0756	75
138	Prestwick-1084	-0.586	4	-0.647	0.0369	0.2326	100
139	ethaverine	-0.582	4	-0.645	0.03774	0.0637	100
140	DL-thiorphan	-0.669	2	-0.861	0.03845	0.0682	100
141	rifampicin	0.446	4	0.644	0.03867	0.0988	75
142	thioproperazine	-0.491	5	-0.579	0.03917	0.0217	100
143	rotenone	0.331	4	0.64	0.04074	0.076	50
144	hesperetin	-0.372	5	-0.577	0.04091	0.0741	80
145	iopamidol	0.474	4	0.639	0.04152	0.1509	75
146	finasteride	0.241	6	0.531	0.04211	0.1689	50
147	fluocinonide	-0.606	5	-0.574	0.04227	0.0843	100
148	niclosamide	-0.546	5	-0.573	0.04246	0.1653	100
149	thioguanosine	-0.507	4	-0.636	0.04269	0.2042	75
150	chlortalidone	0.456	4	0.636	0.04321	0.021	75
151	diphenhydramine	0.379	5	0.576	0.04324	0.1525	60
152	sulfametoxydiazine	-0.614	4	-0.635	0.04335	0.1117	100
153	nimodipine	0.321	4	0.635	0.04337	0.0679	50
154	iopromide	0.315	4	0.635	0.04372	0.0511	50
155	meclofenamic acid	0.373	5	0.574	0.04454	0.0983	60
156	famprofazone	-0.562	6	-0.528	0.04458	0.1264	100
157	mimosine	0.358	3	0.717	0.04473	0.0429	66
158	ethisterone	0.236	6	0.525	0.04555	0.0516	66
159	nicergoline	-0.507	5	-0.567	0.0461	0.0687	100
160	Prestwick-682	0.489	4	0.629	0.04697	0.071	75
161	clorgiline	-0.536	4	-0.628	0.04733	0.064	75
162	levonorgestrel	-0.456	6	-0.524	0.04734	0.1967	83
163	terfenadine	-0.657	3	-0.713	0.04803	0.1651	100
164	meclofenoxate	-0.476	6	-0.523	0.04825	0.1931	83
165	bisacodyl	-0.604	4	-0.625	0.04886	0.0807	100
166	cefepime	0.291	4	0.626	0.04904	0.0323	75
167	ginkgolide A	-0.589	4	-0.622	0.05105	0.23	100
168	1,4-chrysenequinone	-0.642	2	-0.84	0.05135	0.1016	100
169	0297417-0002B	-0.623	3	-0.706	0.0515	0.1393	100
170	levobunolol	0.335	4	0.62	0.05246	0.0962	50
171	zomepirac	-0.58	4	-0.618	0.05377	0.1714	100
172	remoxipride	-0.61	4	-0.616	0.05461	0.1564	100
173	guanadrel	0.292	5	0.558	0.05465	0.2126	60
174	alprostadil	0.314	7	0.476	0.05623	0.3155	57
175	monobenzone	-0.498	4	-0.613	0.05656	0.0946	75
176	rottlerin	-0.586	3	-0.693	0.05827	0.1597	100
177	citalopram	0.255	4	0.612	0.05835	0.0595	50
178	cefamandole	0.323	4	0.609	0.06014	0.2552	50
179	streptozocin	0.389	4	0.608	0.06117	0.1131	75
180	amiprilose	0.25	4	0.607	0.06135	0.0211	75
181	hexestrol	-0.582	4	-0.607	0.06145	0.1752	100
182	isocarboxazid	0.378	5	0.549	0.06154	0.1183	60
183	6-azathymine	-0.508	4	-0.606	0.0625	0.1264	75
184	4,5-dianilinophthalimide	-0.615	2	-0.822	0.06257	0.037	100
185	sirolimus	-0.313	44	-0.194	0.06328	0.7123	61
186	pergolide	0.467	4	0.605	0.06342	0.0961	75
187	iloprost	0.499	3	0.68	0.0645	0.1908	66
188	azacitidine	-0.547	3	-0.682	0.06474	0.2692	100
189	lansoprazole	0.294	4	0.603	0.06477	0.0684	75
190	methylprednisolone	-0.526	4	-0.602	0.06533	0.1062	100
191	methapyrilene	-0.535	4	-0.601	0.06604	0.0559	100
192	mefexamide	0.36	4	0.6	0.06634	0.0736	75
193	metampicillin	0.387	5	0.543	0.06677	0.2414	60
194	aconitine	0.247	4	0.599	0.0671	0.0392	50
195	arecoline	0.292	4	0.599	0.06722	0.1133	75
196	etamsylate	-0.513	4	-0.599	0.06756	0.1634	100
197	doxazosin	-0.636	4	-0.599	0.06793	0.241	100
198	quinostatin	-0.738	2	-0.814	0.06833	0.3053	100
199	adenosine phosphate	0.28	4	0.595	0.0702	0.0559	75
200	lasalocid	0.409	4	0.595	0.0702	0.3628	75
201	meclocycline	0.243	4	0.594	0.07088	0.1167	50
202	terazosin	0.269	4	0.593	0.07187	0.2079	50
203	iocetamic acid	0.335	4	0.592	0.07295	0.0625	75
204	amiodarone	-0.509	5	-0.532	0.07328	0.2216	80
205	procyclidine	-0.353	4	-0.589	0.07665	0.069	75
206	melatonin	0.264	4	0.588	0.07671	0.0641	50
207	bupropion	-0.601	4	-0.589	0.07685	0.1235	100
208	TTNPB	0.488	2	0.805	0.07694	0.0621	100
209	megestrol	0.439	4	0.586	0.07778	0.1576	75
210	dantrolene	0.196	6	0.486	0.07844	0.141	50
211	withaferin A	-0.539	4	-0.587	0.0786	0.2049	100
212	latamoxef	-0.565	3	-0.657	0.07982	0.1092	100
213	etomidate	-0.593	3	-0.656	0.0809	0.2266	100
214	benzocaine	0.389	4	0.582	0.08174	0.1718	75
215	levcycloserine	-0.491	4	-0.583	0.0823	0.1856	100
216	streptomycin	0.378	4	0.581	0.08295	0.1633	50
217	calmidazolium	-0.595	2	-0.792	0.0847	0.1967	100
218	bromperidol	-0.684	3	-0.651	0.08493	0.0843	100
219	pimozide	-0.525	4	-0.58	0.08518	0.2743	75
220	folic acid	0.345	4	0.578	0.08546	0.108	75
221	N-acetyl-L-leucine	-0.476	4	-0.579	0.08606	0.2437	75
222	clofazimine	0.409	5	0.522	0.08673	0.2802	60
223	naltrexone	0.216	5	0.521	0.08757	0.2239	60
224	clomifene	-0.509	4	-0.576	0.0886	0.1232	75
225	atropine	-0.489	4	-0.576	0.08878	0.3138	75
226	metronidazole	0.277	5	0.52	0.08878	0.2814	60
227	zaprinast	0.28	4	0.573	0.09021	0.0738	75
228	khellin	0.377	5	0.518	0.09036	0.1386	60
229	ebselen	-0.651	3	-0.645	0.09068	0.1281	100
230	meticrane	-0.45	5	-0.515	0.09072	0.4439	80
231	myosmine	0.255	6	0.472	0.09404	0.1985	50
232	butirosin	-0.535	4	-0.57	0.09495	0.0533	100
233	Gly-His-Lys	0.569	3	0.64	0.09593	0.3539	66
234	pirenperone	0.199	5	0.513	0.09627	0.1184	60
235	procainamide	-0.301	4	-0.567	0.0975	0.0777	75
236	sulmazole	0.363	3	0.638	0.09759	0.2741	66
237	0173570-0000	-0.489	6	-0.469	0.09857	0.2993	66
238	roxithromycin	-0.475	4	-0.566	0.09913	0.2556	75
239	pentamidine	-0.384	5	-0.508	0.09925	0.1437	80
240	nizatidine	0.262	4	0.562	0.10098	0.1037	75
241	harpagoside	0.411	4	0.56	0.1036	0.2065	75
242	triamterene	-0.214	5	-0.505	0.10394	0.1227	60
243	azapropazone	0.33	3	0.63	0.10492	0.1273	66
244	bretylium tosilate	0.285	4	0.558	0.10519	0.0846	50
245	karakoline	0.207	6	0.463	0.10592	0.2032	50
246	chrysin	-0.52	3	-0.627	0.10788	0.2879	66
247	nifuroxazide	-0.442	4	-0.557	0.10848	0.1631	100
248	furaltadone	-0.356	6	-0.462	0.10868	0.2428	83
249	glibenclamide	-0.466	4	-0.555	0.11039	0.2412	75
250	methylbenzethonium chloride	-0.404	6	-0.459	0.11257	0.2149	83
251	noscapine	0.334	4	0.551	0.11307	0.0402	50
252	hydralazine	-0.486	6	-0.458	0.11362	0.1217	83
253	etacrynic acid	-0.511	3	-0.62	0.11516	0.1138	66
254	ethotoin	-0.502	6	-0.457	0.11545	0.3927	83
255	cefaclor	0.307	4	0.548	0.11596	0.0694	50
256	molindone	0.225	4	0.548	0.11612	0.0917	75
257	alexidine	-0.368	4	-0.55	0.11665	0.1197	75
258	halofantrine	0.289	3	0.619	0.11692	0.2414	66
259	Prestwick-685	-0.437	5	-0.494	0.11731	0.2105	80
260	guanethidine	-0.554	3	-0.618	0.11772	0.139	100
261	(-)-MK-801	-0.523	4	-0.549	0.11884	0.146	100
262	clobetasol	-0.562	3	-0.617	0.11898	0.0729	100
263	ciclacillin	0.232	4	0.546	0.11926	0.0677	50
264	iodixanol	0.483	3	0.616	0.12102	0.0988	66
265	lomefloxacin	-0.446	6	-0.453	0.12137	0.1641	83
266	aceclofenac	0.338	4	0.543	0.12184	0.0822	75
267	H-7	-0.493	4	-0.546	0.12244	0.6212	100
268	PHA-00767505E	0.249	4	0.542	0.12381	0.1161	50
269	Prestwick-674	-0.411	6	-0.451	0.12381	0.3193	66
270	sulfafurazole	-0.436	5	-0.49	0.12404	0.3352	80
271	suprofen	0.27	4	0.54	0.12562	0.0811	75
272	antimycin A	-0.393	5	-0.488	0.1262	0.2463	60
273	fluticasone	0.466	4	0.539	0.12708	0.1613	75
274	diperodon	0.216	3	0.61	0.12912	0.1148	66
275	xamoterol	0.492	3	0.608	0.1318	0.1627	66
276	irinotecan	-0.581	3	-0.606	0.13316	0.4457	100
277	chlorcyclizine	-0.357	6	-0.445	0.13317	0.0804	66
278	copper sulfate	0.302	4	0.535	0.13334	0.1761	75
279	tiletamine	0.278	4	0.531	0.13794	0.1324	75
280	procaine	-0.474	5	-0.481	0.13824	0.4518	80
281	flucloxacillin	0.25	4	0.528	0.14134	0.0844	75
282	indoprofen	0.255	4	0.528	0.1421	0.3889	75
283	hydroquinine	0.267	4	0.527	0.14387	0.269	75
284	acetylsalicylic acid	-0.381	13	-0.304	0.14415	0.3155	69
285	5224221	-0.553	2	-0.73	0.14448	0.3233	100
286	harmalol	0.378	3	0.598	0.1452	0.1439	66
287	bromopride	-0.409	6	-0.438	0.14568	0.1882	66
288	emetine	-0.485	4	-0.527	0.14611	0.5941	75
289	estriol	-0.412	4	-0.526	0.14633	0.3515	75
290	Prestwick-967	0.168	4	0.524	0.14761	0.1077	50
291	prednisone	0.187	5	0.476	0.14817	0.2105	60
292	diazoxide	0.186	5	0.476	0.14839	0.1622	60
293	cetirizine	-0.517	4	-0.525	0.14856	0.4155	75
294	gelsemine	0.07	4	0.523	0.14878	0.078	50
295	prenylamine	-0.474	4	-0.525	0.14886	0.2477	75
296	5279552	-0.591	2	-0.726	0.14889	0.1607	100
297	corynanthine	-0.594	3	-0.594	0.14915	0.2554	100
298	cytisine	0.147	4	0.522	0.15033	0.1677	50
299	parthenolide	-0.313	4	-0.523	0.15095	0.4828	75
300	natamycin	-0.452	4	-0.523	0.15156	0.4112	75
301	IC-86621	0.301	4	0.52	0.15238	0.1718	50
302	fusidic acid	0.344	4	0.519	0.15345	0.1242	50
303	metyrapone	-0.492	4	-0.521	0.15481	0.2434	75
304	demecarium bromide	0.16	4	0.518	0.1556	0.2786	50
305	oxaprozin	-0.364	6	-0.432	0.15627	0.1479	83
306	canadine	0.271	4	0.516	0.15769	0.5092	50
307	cinchocaine	-0.326	5	-0.469	0.1577	0.2618	60
308	hemicholinium	0.255	4	0.516	0.15851	0.0758	50
309	memantine	0.159	4	0.516	0.15851	0.2041	50
310	fenofibrate	0.281	3	0.588	0.15946	0.1911	66
311	halcinonide	-0.428	5	-0.467	0.16041	0.2279	60
312	6-benzylaminopurine	-0.506	5	-0.466	0.16185	0.1524	80
313	deptropine	-0.47	4	-0.515	0.16332	0.2985	75
314	troleandomycin	-0.379	4	-0.514	0.1643	0.2147	75
315	sertaconazole	-0.344	4	-0.513	0.16509	0.1979	75
316	lorglumide	-0.328	5	-0.463	0.1683	0.4769	60
317	pancuronium bromide	-0.443	4	-0.511	0.16841	0.2593	75
318	doxorubicin	-0.594	3	-0.581	0.1692	0.5489	100
319	ambroxol	0.341	4	0.508	0.16957	0.3987	50
320	norcyclobenzaprine	-0.475	4	-0.509	0.17088	0.4031	75
321	carmustine	0.3	3	0.581	0.17142	0.2683	66
322	gossypol	-0.567	6	-0.424	0.1726	0.4015	83
323	cefotaxime	0.18	5	0.46	0.17629	0.0884	60
324	apomorphine	-0.321	5	-0.458	0.17671	0.3039	60
325	ceforanide	0.207	4	0.503	0.17745	0.3241	50
326	fenbufen	-0.316	6	-0.421	0.17753	0.2616	66
327	tetraethylenepentamine	0.13	6	0.42	0.17774	0.146	50
328	trioxysalen	-0.525	4	-0.504	0.17846	0.5228	75
329	acetazolamide	-0.323	4	-0.504	0.17894	0.1326	75
330	buflomedil	-0.196	4	-0.503	0.18045	0.2951	50
331	terconazole	-0.391	4	-0.503	0.18124	0.1783	75
332	protriptyline	-0.473	4	-0.502	0.18184	0.2556	75
333	hexamethonium bromide	-0.445	5	-0.455	0.18236	0.2903	80
334	diethylcarbamazine	-0.293	4	-0.502	0.1829	0.0777	75
335	etofenamate	-0.434	4	-0.5	0.1855	0.2424	75
336	ivermectin	-0.314	5	-0.454	0.18596	0.3651	60
337	S-propranolol	-0.479	4	-0.499	0.18636	0.1402	75
338	ifenprodil	-0.424	4	-0.499	0.18715	0.4368	75
339	arcaine	0.309	4	0.497	0.18815	0.1831	50
340	doxycycline	0.194	5	0.453	0.18907	0.163	60
341	epiandrosterone	-0.45	4	-0.498	0.1893	0.2836	75
342	tranylcypromine	-0.35	5	-0.451	0.19061	0.43	60
343	bezafibrate	-0.373	4	-0.496	0.19097	0.3218	75
344	carbachol	-0.373	4	-0.496	0.19131	0.2543	75
345	zimeldine	-0.43	5	-0.451	0.19165	0.4725	60
346	tetracaine	0.237	3	0.568	0.19261	0.2706	66
347	tocainide	0.206	4	0.493	0.19312	0.2803	50
348	atracurium besilate	0.404	3	0.567	0.19472	0.4162	66
349	thiamazole	0.265	6	0.411	0.19548	0.4318	50
350	saquinavir	-0.436	4	-0.494	0.19591	0.1534	75
351	moroxydine	0.235	5	0.449	0.1968	0.2345	60
352	dequalinium chloride	-0.455	4	-0.492	0.19827	0.4253	75
353	cefoperazone	0.275	3	0.564	0.19986	0.3137	66
354	metoprolol	0.148	4	0.49	0.20022	0.2431	50
355	clomipramine	-0.471	4	-0.491	0.2003	0.3359	75
356	vinpocetine	-0.47	4	-0.491	0.20114	0.3386	75
357	ketanserin	-0.445	4	-0.49	0.20173	0.2527	75
358	bambuterol	0.136	4	0.489	0.20177	0.2252	50
359	tropine	0.333	4	0.488	0.20349	0.1563	50
360	flunarizine	-0.442	4	-0.489	0.2037	0.3455	75
361	benzonatate	-0.337	5	-0.443	0.20739	0.1299	80
362	pyrimethamine	-0.468	5	-0.443	0.20797	0.3067	80
363	pepstatin	0.22	4	0.484	0.20886	0.1875	50
364	estropipate	0.416	4	0.484	0.20939	0.2275	50
365	pilocarpine	0.216	4	0.484	0.20939	0.4843	50
366	norethisterone	-0.484	4	-0.486	0.21027	0.2927	75
367	mefloquine	-0.508	5	-0.442	0.21041	0.4537	80
368	N6-methyladenosine	0.263	4	0.483	0.2111	0.2275	50
369	doxepin	-0.478	3	-0.557	0.2116	0.1936	66
370	Prestwick-664	-0.349	6	-0.406	0.21165	0.3931	66
371	nefopam	0.134	5	0.441	0.21522	0.2754	60
372	Prestwick-860	-0.427	4	-0.483	0.21667	0.5344	75
373	lycorine	0.121	5	0.44	0.21706	0.6111	60
374	clebopride	0.131	4	0.48	0.21707	0.275	50
375	dipivefrine	-0.253	4	-0.482	0.21741	0.2105	50
376	meclozine	-0.502	5	-0.438	0.21828	0.3899	80
377	mepyramine	-0.451	4	-0.481	0.21984	0.1726	75
378	MK-886	0.273	2	0.668	0.22047	0.1926	50
379	diltiazem	-0.334	5	-0.436	0.22147	0.4792	60
380	ciclopirox	-0.447	4	-0.48	0.22292	0.3524	75
381	dioxybenzone	-0.25	4	-0.479	0.22423	0.2903	50
382	tracazolate	-0.418	4	-0.479	0.22557	0.3212	75
383	trimipramine	-0.358	4	-0.478	0.22586	0.126	75
384	Prestwick-665	-0.436	5	-0.434	0.22659	0.4233	80
385	tolazamide	0.361	3	0.547	0.22959	0.2203	66
386	promazine	-0.452	6	-0.398	0.22987	0.2606	83
387	tenoxicam	0.18	4	0.473	0.2308	0.2289	50
388	alfuzosin	-0.408	5	-0.432	0.23104	0.2826	80
389	reserpine	-0.437	3	-0.546	0.23247	0.3154	66
390	dinoprost	0.227	4	0.472	0.23338	0.3882	50
391	mesalazine	0.249	5	0.432	0.2334	0.104	60
392	pargyline	-0.338	4	-0.475	0.23372	0.4757	50
393	myricetin	0.186	4	0.472	0.23384	0.3632	50
394	cyclic adenosine monophosphate	0.233	4	0.472	0.23418	0.3987	50
395	oxybenzone	0.163	4	0.472	0.235	0.5235	50
396	seneciphylline	-0.296	4	-0.474	0.23543	0.2086	50
397	lincomycin	0.308	3	0.544	0.23626	0.1575	66
398	vidarabine	-0.5	4	-0.474	0.23651	0.3125	75
399	propidium iodide	0.087	4	0.471	0.23685	0.2485	50
400	quinisocaine	-0.421	4	-0.473	0.23858	0.232	75
401	colistin	0.171	4	0.47	0.23899	0.5495	50
402	prilocaine	-0.128	6	-0.393	0.24051	0.2116	50
403	pyridoxine	-0.328	4	-0.471	0.24094	0.4509	50
404	ricinine	-0.289	4	-0.469	0.2458	0.2169	75
405	simvastatin	-0.499	4	-0.468	0.24803	0.3133	75
406	bufexamac	-0.418	4	-0.468	0.24874	0.4529	75
407	baclofen	0.205	5	0.425	0.24896	0.0894	60
408	imatinib	0.208	2	0.647	0.24947	0.2901	50
409	dilazep	-0.33	5	-0.424	0.24998	0.4276	80
410	lymecycline	-0.409	4	-0.467	0.25007	0.4121	75
411	ticlopidine	-0.327	5	-0.424	0.25043	0.1862	80
412	phenindione	-0.251	4	-0.467	0.25169	0.3838	50
413	phthalylsulfathiazole	-0.386	5	-0.424	0.25175	0.7286	60
414	flunixin	-0.462	5	-0.423	0.25313	0.397	80
415	liothyronine	-0.32	4	-0.464	0.25648	0.4715	50
416	dicycloverine	-0.298	5	-0.421	0.25739	0.3435	60
417	laudanosine	0.238	4	0.46	0.26022	0.1395	50
418	roxarsone	-0.45	4	-0.463	0.2606	0.4493	75
419	riboflavin	-0.448	4	-0.462	0.26098	0.5759	75
420	disopyramide	0.238	4	0.46	0.26185	0.3007	50
421	norfloxacin	-0.315	5	-0.419	0.26222	0.3053	60
422	xylazine	-0.402	4	-0.461	0.26352	0.3053	75
423	ketoprofen	-0.472	6	-0.384	0.26475	0.2418	83
424	metrizamide	0.26	4	0.458	0.26676	0.4658	50
425	nipecotic acid	-0.419	4	-0.459	0.26768	0.5053	75
426	imipenem	-0.298	4	-0.459	0.26834	0.5525	50
427	Y-27632	-0.513	2	-0.634	0.26928	0.47	100
428	MG-262	-0.315	3	-0.527	0.26981	0.6142	66
429	meglumine	0.107	4	0.456	0.27076	0.1772	50
430	fluorometholone	-0.446	4	-0.458	0.27166	0.2722	75
431	cycloserine	-0.278	4	-0.457	0.27307	0.544	50
432	trimethylcolchicinic acid	-0.44	4	-0.457	0.27387	0.271	75
433	loperamide	-0.406	6	-0.38	0.27399	0.4649	66
434	mepenzolate bromide	-0.303	5	-0.413	0.27668	0.3789	80
435	dl-alpha tocopherol	0.06	4	0.453	0.27699	0.1163	50
436	scriptaid	-0.429	3	-0.524	0.27734	0.4792	66
437	neomycin	-0.333	5	-0.412	0.27834	0.3511	80
438	tobramycin	-0.357	4	-0.453	0.28244	0.5618	50
439	lomustine	-0.24	4	-0.452	0.28451	0.5563	50
440	lanatoside C	-0.411	6	-0.376	0.28567	0.4681	83
441	xylometazoline	-0.212	4	-0.452	0.28602	0.4033	50
442	piperidolate	-0.392	3	-0.518	0.2888	0.5876	66
443	butein	-0.542	2	-0.621	0.2893	0.1986	100
444	0198306-0000	-0.31	4	-0.45	0.2909	0.4091	50
445	triflusal	-0.434	3	-0.517	0.2925	0.6051	66
446	propafenone	-0.277	4	-0.449	0.29314	0.4506	50
447	rimexolone	-0.306	4	-0.449	0.29378	0.6529	50
448	netilmicin	0.177	4	0.446	0.29517	0.3357	50
449	isoconazole	-0.432	5	-0.405	0.2953	0.2787	60
450	nitrendipine	-0.467	5	-0.404	0.29673	0.2515	80
451	noretynodrel	-0.385	4	-0.447	0.2968	0.3111	75
452	oxybutynin	-0.34	4	-0.447	0.2981	0.3665	75
453	lysergol	-0.392	4	-0.445	0.30267	0.3161	75
454	homosalate	0.088	4	0.443	0.30287	0.2177	50
455	levocabastine	-0.282	4	-0.444	0.30532	0.3474	75
456	3-nitropropionic acid	-0.373	4	-0.442	0.31182	0.4972	75
457	papaverine	-0.29	4	-0.441	0.31321	0.3333	50
458	colforsin	-0.335	5	-0.398	0.31353	0.3009	60
459	dicoumarol	0.108	6	0.365	0.3151	0.1742	50
460	zalcitabine	0.049	4	0.438	0.31801	0.2563	50
461	ronidazole	-0.422	3	-0.505	0.31816	0.6303	66
462	PNU-0251126	-0.286	6	-0.361	0.32903	0.4733	50
463	berberine	-0.428	4	-0.435	0.32981	0.4942	75
464	valinomycin	-0.243	4	-0.434	0.33251	0.4786	75
465	nomegestrol	0.134	3	0.5	0.33281	0.4375	66
466	ursodeoxycholic acid	-0.338	3	-0.498	0.33455	0.5816	66
467	calcium pantothenate	-0.42	4	-0.433	0.33458	0.5026	75
468	iopanoic acid	-0.027	4	-0.433	0.33621	0.35	50
469	fluorocurarine	-0.275	4	-0.432	0.33792	0.3246	50
470	capsaicin	-0.303	4	-0.432	0.33844	0.4645	50
471	betahistine	-0.48	4	-0.431	0.34178	0.5029	75
472	5230742	-0.574	2	-0.588	0.34188	0.459	100
473	nitrofurantoin	-0.371	5	-0.388	0.34208	0.4198	60
474	flurbiprofen	-0.29	5	-0.388	0.34243	0.3832	60
475	benzethonium chloride	-0.196	3	-0.495	0.34252	0.3934	66
476	chlorphenesin	-0.414	4	-0.43	0.34429	0.5194	75
477	alfaxalone	-0.344	3	-0.494	0.34643	0.4628	66
478	benzbromarone	0.192	3	0.493	0.34659	0.3922	66
479	aminophylline	-0.246	4	-0.429	0.34691	0.4255	50
480	racecadotril	0.221	4	0.427	0.34811	0.359	50
481	semustine	-0.247	4	-0.428	0.34892	0.5926	50
482	pempidine	-0.307	5	-0.386	0.35052	0.4506	60
483	acebutolol	0.129	5	0.385	0.3532	0.4583	60
484	spiperone	-0.579	2	-0.581	0.35393	0.2895	100
485	serotonin	0.065	5	0.384	0.35426	0.3603	60
486	metergoline	-0.455	4	-0.425	0.35736	0.3304	75
487	sulfamerazine	-0.284	5	-0.383	0.35736	0.4469	60
488	Prestwick-1083	0.131	3	0.488	0.36031	0.2555	66
489	Prestwick-983	0.254	3	0.488	0.36071	0.6627	66
490	cicloheximide	-0.404	4	-0.424	0.36159	0.6	75
491	monocrotaline	-0.461	4	-0.424	0.36205	0.2888	75
492	pyrazinamide	-0.398	4	-0.423	0.36549	0.5027	75
493	trimethoprim	0.073	5	0.38	0.36706	0.3397	60
494	alclometasone	-0.38	4	-0.422	0.36822	0.3571	50
495	BCB000040	0.247	4	0.419	0.36897	0.3886	50
496	isotretinoin	-0.369	4	-0.421	0.36903	0.4444	75
497	enalapril	0.181	4	0.419	0.36987	0.3427	50
498	chlorzoxazone	-0.435	4	-0.421	0.37001	0.6734	75
499	riluzole	0.068	5	0.379	0.37122	0.2987	60
500	fenoprofen	-0.418	6	-0.348	0.3713	0.7194	66
501	primidone	0.134	4	0.418	0.37252	0.2656	50
502	anabasine	-0.409	3	-0.483	0.37275	0.4944	66
503	isopropamide iodide	-0.282	4	-0.42	0.37383	0.3429	75
504	phenazone	0.256	3	0.482	0.37481	0.4245	66
505	ornidazole	-0.378	5	-0.376	0.37985	0.5655	80
506	AH-6809	-0.397	2	-0.565	0.38025	0.4805	100
507	sulfamethoxypyridazine	-0.389	5	-0.374	0.38686	0.6683	60
508	cyproterone	-0.395	4	-0.415	0.3874	0.5989	75
509	pridinol	-0.367	4	-0.415	0.38821	0.4171	75
510	debrisoquine	0.224	4	0.413	0.38827	0.3605	50
511	heliotrine	-0.348	6	-0.342	0.39228	0.592	50
512	propylthiouracil	-0.343	4	-0.413	0.39446	0.6875	50
513	oxolamine	0.126	4	0.411	0.39527	0.6209	50
514	griseofulvin	-0.267	5	-0.371	0.39644	0.3636	80
515	NU-1025	-0.408	2	-0.554	0.39854	0.3817	100
516	azlocillin	-0.46	4	-0.411	0.40064	0.4559	75
517	quercetin	-0.295	6	-0.339	0.40197	0.3413	66
518	monensin	0.151	6	0.338	0.40296	0.7725	50
519	molsidomine	0.102	4	0.408	0.40313	0.4076	50
520	cefazolin	-0.288	5	-0.369	0.40445	0.2147	80
521	ethosuximide	-0.339	4	-0.409	0.40446	0.431	75
522	fluvoxamine	-0.379	4	-0.409	0.40604	0.4678	75
523	tropicamide	-0.311	6	-0.338	0.40642	0.4713	50
524	nordihydroguaiaretic acid	-0.229	15	-0.22	0.40712	0.4603	60
525	methazolamide	-0.294	4	-0.408	0.40795	0.568	50
526	fipexide	-0.411	3	-0.469	0.40924	0.5912	66
527	estrone	0.072	4	0.405	0.41192	0.2826	50
528	corbadrine	-0.352	4	-0.406	0.41439	0.5342	50
529	nifurtimox	0.135	4	0.402	0.42131	0.2963	50
530	imidurea	-0.331	3	-0.464	0.42216	0.5838	66
531	pivampicillin	-0.094	4	-0.404	0.42251	0.5187	50
532	omeprazole	-0.285	4	-0.404	0.42332	0.7685	50
533	lumicolchicine	0.171	3	0.461	0.42831	0.3696	66
534	verteporfin	-0.297	3	-0.462	0.42839	0.7384	66
535	CP-645525-01	-0.425	3	-0.461	0.42965	0.5597	66
536	esculetin	-0.35	3	-0.461	0.42999	0.4423	66
537	spiradoline	0.082	4	0.398	0.43536	0.3643	50
538	cefoxitin	0.162	4	0.397	0.43723	0.4	50
539	6-bromoindirubin-3'-oxime	-0.187	7	-0.307	0.43965	0.7103	57
540	moxisylyte	-0.241	5	-0.358	0.44193	0.4905	60
541	artemisinin	-0.363	3	-0.455	0.44506	0.4699	66
542	etilefrine	0.226	4	0.395	0.44578	0.5497	50
543	piretanide	0.171	4	0.394	0.44817	0.5152	50
544	denatonium benzoate	-0.207	4	-0.395	0.44994	0.6425	50
545	5194442	-0.31	4	-0.394	0.45412	0.4841	75
546	methoxamine	0.26	4	0.392	0.45426	0.4268	50
547	tetryzoline	0.054	3	0.451	0.45491	0.3333	66
548	chloramphenicol	-0.29	4	-0.394	0.45511	0.5476	50
549	PNU-0230031	-0.325	8	-0.284	0.45605	0.5938	62
550	harmine	-0.336	4	-0.391	0.46297	0.7735	75
551	cyclobenzaprine	-0.258	4	-0.391	0.46472	0.4667	75
552	cefmetazole	-0.379	4	-0.39	0.46532	0.3546	75
553	colecalciferol	-0.308	4	-0.389	0.46828	0.4022	75
554	adrenosterone	-0.37	4	-0.389	0.46904	0.569	75
555	mianserin	-0.303	5	-0.35	0.47263	0.4015	60
556	fursultiamine	0.128	4	0.386	0.47329	0.307	50
557	drofenine	-0.32	4	-0.387	0.47681	0.478	75
558	sparteine	0.019	4	0.385	0.47793	0.4245	50
559	chlorpropamide	-0.206	6	-0.319	0.47829	0.522	50
560	maprotiline	0.138	4	0.385	0.47851	0.7474	50
561	11-deoxy-16,16-dimethylprostaglandin E2	-0.384	4	-0.386	0.48018	0.5369	75
562	flufenamic acid	-0.252	6	-0.318	0.48027	0.7086	50
563	bephenium hydroxynaphthoate	-0.35	5	-0.347	0.48263	0.6158	80
564	bacampicillin	0.106	4	0.383	0.484	0.5367	50
565	ethoxyquin	-0.353	5	-0.346	0.48509	0.3333	60
566	mesoridazine	-0.18	4	-0.384	0.48688	0.4863	50
567	torasemide	-0.223	4	-0.384	0.48718	0.5545	50
568	depudecin	0.268	2	0.505	0.4892	0.4625	50
569	metaraminol	-0.259	4	-0.382	0.49239	0.5196	75
570	flucytosine	-0.307	4	-0.382	0.49297	0.5491	50
571	betaxolol	-0.278	4	-0.381	0.49591	0.6308	75
572	enoxacin	-0.428	4	-0.381	0.49591	0.4012	75
573	cyclizine	-0.233	4	-0.38	0.49876	0.5528	75
574	prazosin	-0.26	6	-0.313	0.50064	0.4841	66
575	convolamine	0.202	4	0.378	0.50138	0.4488	50
576	scopoletin	-0.301	2	-0.499	0.50147	0.6875	50
577	sulfacetamide	0.173	4	0.377	0.5048	0.3932	50
578	cefixime	-0.171	4	-0.377	0.5084	0.5	50
579	salbutamol	-0.404	5	-0.34	0.50892	0.4887	80
580	zuclopenthixol	0.015	4	0.375	0.51049	0.5191	50
581	gramine	-0.205	4	-0.376	0.5139	0.4973	75
582	C-75	-0.232	4	-0.375	0.51427	0.4375	75
583	meropenem	-0.276	4	-0.375	0.51527	0.6402	50
584	piribedil	-0.343	4	-0.374	0.51821	0.59	50
585	nalbuphine	-0.229	5	-0.337	0.51851	0.5652	80
586	piperlongumine	-0.288	2	-0.495	0.51958	0.6266	50
587	nisoxetine	-0.224	4	-0.374	0.51972	0.5793	50
588	suramin sodium	0.125	4	0.373	0.5199	0.548	50
589	5255229	-0.203	2	-0.494	0.52153	0.3771	50
590	naringin	-0.437	4	-0.373	0.52171	0.6165	75
591	tetrahydroalstonine	0.17	4	0.372	0.52237	0.5732	50
592	rifabutin	-0.423	3	-0.426	0.52412	0.6667	66
593	tetrandrine	-0.379	4	-0.373	0.52414	0.537	75
594	syrosingopine	-0.421	4	-0.372	0.52583	0.5567	75
595	carbamazepine	-0.208	8	-0.269	0.52626	0.6364	50
596	phenelzine	-0.393	6	-0.307	0.52958	0.4333	66
597	metamizole sodium	-0.306	6	-0.306	0.53288	0.8263	66
598	betonicine	-0.041	6	0.304	0.53492	0.6299	50
599	ionomycin	-0.431	3	-0.421	0.53884	0.5984	66
600	fludroxycortide	-0.295	5	-0.331	0.53956	0.6936	60
601	lactobionic acid	0.137	4	0.366	0.5424	0.3926	50
602	piromidic acid	-0.17	4	-0.366	0.5463	0.6524	50
603	nomifensine	-0.362	5	-0.33	0.54643	0.473	80
604	pseudopelletierine	-0.315	4	-0.366	0.54706	0.665	50
605	nialamide	-0.283	4	-0.366	0.54757	0.6418	50
606	flupentixol	-0.243	4	-0.366	0.54871	0.656	50
607	5253409	-0.402	2	-0.486	0.55286	0.3248	50
608	proxyphylline	-0.327	4	-0.364	0.55571	0.6881	50
609	chlorambucil	-0.339	4	-0.363	0.55871	0.6039	50
610	solanine	-0.297	4	-0.363	0.55979	0.6339	50
611	STOCK1N-35215	-0.247	3	-0.412	0.56237	0.5522	66
612	solasodine	-0.282	6	-0.298	0.56364	0.6374	50
613	zidovudine	-0.351	4	-0.361	0.56514	0.5638	50
614	alsterpaullone	-0.392	3	-0.41	0.56638	0.8	66
615	5211181	-0.396	2	-0.482	0.56813	0.3778	50
616	demeclocycline	-0.356	6	-0.297	0.56843	0.7845	66
617	anisomycin	-0.395	4	-0.359	0.57172	0.839	75
618	budesonide	-0.309	4	-0.358	0.57471	0.7059	75
619	stachydrine	0.091	4	0.357	0.57507	0.4702	50
620	perhexiline	-0.433	4	-0.357	0.57698	0.6975	75
621	probucol	0.04	6	0.294	0.57852	0.396	50
622	flecainide	0.081	6	0.294	0.57999	0.5517	50
623	sulfamethizole	-0.166	4	-0.355	0.58461	0.5876	50
624	kinetin	-0.225	4	-0.355	0.58525	0.5283	50
625	mepacrine	-0.389	2	-0.477	0.58537	0.4833	50
626	canavanine	-0.382	3	-0.402	0.58825	0.6289	66
627	difenidol	-0.41	3	-0.402	0.58926	0.7611	66
628	bisoprolol	0.045	4	0.351	0.5941	0.5802	50
629	sulfinpyrazone	-0.293	4	-0.352	0.59631	0.6974	50
630	butoconazole	-0.451	4	-0.352	0.59824	0.5878	75
631	bicuculline	0.012	4	0.35	0.59932	0.5926	50
632	acetohexamide	0.026	4	0.35	0.59981	0.4678	50
633	metixene	-0.022	4	0.349	0.60079	0.7912	50
634	isoetarine	-0.32	4	-0.35	0.60325	0.6049	50
635	napelline	-0.254	4	-0.35	0.60325	0.7119	50
636	cefalotin	-0.314	4	-0.349	0.60508	0.6281	75
637	chlorprothixene	-0.272	4	-0.349	0.60789	0.551	75
638	kawain	-0.315	5	-0.314	0.60981	0.5473	60
639	phenylpropanolamine	-0.018	4	0.347	0.61012	0.5068	50
640	edrophonium chloride	-0.316	5	-0.314	0.61025	0.6782	60
641	succinylsulfathiazole	0.049	4	0.346	0.61211	0.4789	50
642	AG-028671	-0.374	3	-0.393	0.61415	0.5987	66
643	PF-01378883-00	-0.262	4	-0.346	0.61835	0.5549	75
644	propofol	-0.234	4	-0.345	0.62084	0.5854	50
645	BCB000039	-0.369	3	-0.39	0.62363	0.5901	66
646	ouabain	-0.377	4	-0.344	0.62494	0.7719	75
647	cefsulodin	-0.367	4	-0.343	0.62731	0.6374	75
648	paracetamol	-0.299	4	-0.343	0.62866	0.6685	50
649	hymecromone	-0.211	4	-0.343	0.62919	0.6084	50
650	triprolidine	-0.153	4	-0.342	0.63156	0.6038	75
651	etidronic acid	0.035	4	0.34	0.63214	0.5548	50
652	desoxycortone	-0.289	4	-0.342	0.63319	0.6782	75
653	ioversol	-0.33	4	-0.341	0.63524	0.6818	50
654	practolol	-0.271	4	-0.341	0.63562	0.6378	50
655	naloxone	-0.348	6	-0.281	0.64	0.768	66
656	brompheniramine	0.007	4	0.338	0.6401	0.6412	50
657	cyanocobalamin	-0.171	4	-0.338	0.64382	0.6811	75
658	gabapentin	-0.363	4	-0.336	0.65285	0.6167	75
659	homochlorcyclizine	-0.191	4	-0.335	0.65396	0.6406	50
660	mitoxantrone	-0.363	3	-0.379	0.65421	0.7943	66
661	hycanthone	-0.472	4	-0.334	0.65673	0.6975	75
662	5252917	-0.261	2	-0.456	0.66215	0.7349	50
663	scopolamine N-oxide	-0.341	5	-0.299	0.66711	0.8104	60
664	mephentermine	-0.218	5	-0.299	0.66769	0.5778	60
665	delsoline	-0.418	4	-0.331	0.66834	0.7401	75
666	bethanechol	0.059	4	0.329	0.67029	0.5899	50
667	pipenzolate bromide	-0.437	4	-0.33	0.67177	0.7143	75
668	N-acetylmuramic acid	0.045	4	0.328	0.67451	0.753	50
669	isradipine	-0.28	4	-0.329	0.67678	0.629	50
670	phenacetin	-0.345	4	-0.328	0.67728	0.7033	75
671	propranolol	-0.006	4	0.327	0.67793	0.6439	50
672	niridazole	-0.264	4	-0.328	0.67881	0.7104	50
673	antazoline	0.112	4	0.326	0.6808	0.7255	50
674	oxyphenbutazone	0.063	4	0.326	0.6808	0.8705	50
675	exisulind	0.163	2	0.449	0.68146	0.6739	50
676	flumetasone	-0.202	6	-0.271	0.68211	0.7228	50
677	levamisole	-0.336	4	-0.326	0.68358	0.8247	50
678	pregnenolone	-0.018	4	0.324	0.68698	0.7355	50
679	theophylline	-0.005	4	0.324	0.6886	0.6418	50
680	testosterone	-0.316	5	-0.293	0.68994	0.7161	60
681	santonin	-0.055	4	0.323	0.69039	0.5447	50
682	labetalol	-0.392	4	-0.324	0.69126	0.6619	75
683	zoxazolamine	-0.183	4	-0.324	0.69277	0.7929	50
684	danazol	-0.286	4	-0.324	0.69323	0.6463	50
685	levothyroxine sodium	0.156	4	0.322	0.69407	0.7007	50
686	azacyclonol	-0.379	5	-0.292	0.69454	0.7157	60
687	mycophenolic acid	-0.4	3	-0.364	0.69522	0.7788	66
688	ursolic acid	-0.331	4	-0.323	0.69576	0.781	50
689	phenazopyridine	-0.355	4	-0.323	0.69639	0.8038	50
690	enilconazole	-0.204	4	-0.321	0.70069	0.6894	50
691	picrotoxinin	-0.289	4	-0.32	0.70584	0.768	75
692	isoxsuprine	-0.173	5	-0.289	0.70776	0.6233	60
693	canrenoic acid	-0.2	4	-0.319	0.70779	0.7735	75
694	clofilium tosylate	-0.116	3	-0.359	0.70938	0.5299	66
695	mephenesin	-0.248	5	-0.288	0.71074	0.7953	60
696	atropine methonitrate	-0.165	3	-0.358	0.71385	0.7322	66
697	meptazinol	-0.364	4	-0.317	0.71601	0.746	75
698	oxytetracycline	-0.45	3	-0.357	0.71717	0.7425	66
699	biotin	-0.313	3	-0.356	0.72007	0.7102	66
700	urapidil	-0.31	4	-0.315	0.72164	0.7588	50
701	todralazine	-0.224	5	-0.285	0.72378	0.7819	60
702	etanidazole	-0.303	4	-0.313	0.72715	0.7978	50
703	rolitetracycline	-0.295	4	-0.313	0.72767	0.8436	75
704	oxybuprocaine	-0.323	4	-0.313	0.7292	0.7865	50
705	dizocilpine	-0.246	5	-0.284	0.72927	0.6554	60
706	fusaric acid	-0.302	4	-0.312	0.73035	0.8251	75
707	16-phenyltetranorprostaglandin E2	-0.267	4	-0.312	0.73107	0.7619	50
708	alimemazine	-0.257	4	-0.311	0.73347	0.7415	50
709	ritodrine	-0.184	4	-0.311	0.73415	0.6621	75
710	scopolamine	-0.212	4	-0.31	0.73644	0.7279	50
711	flavoxate	-0.304	4	-0.31	0.73688	0.7515	75
712	aminophenazone	-0.309	5	-0.281	0.73808	0.7529	60
713	carbarsone	-0.312	4	-0.309	0.73948	0.6644	50
714	tonzonium bromide	-0.442	4	-0.309	0.73948	0.7931	75
715	benperidol	-0.31	4	-0.309	0.74097	0.7607	50
716	galantamine	-0.062	4	-0.308	0.7432	0.8054	50
717	primaquine	-0.273	4	-0.308	0.74471	0.8056	50
718	tiaprofenic acid	0.003	4	0.307	0.74509	0.7973	50
719	mebendazole	-0.281	5	-0.279	0.74661	0.8641	60
720	sulpiride	-0.353	5	-0.278	0.74835	0.7449	60
721	retrorsine	-0.297	4	-0.306	0.74935	0.7101	50
722	cromoglicic acid	-0.32	2	-0.427	0.74963	0.7293	50
723	bemegride	0.15	4	0.305	0.75004	0.575	50
724	idazoxan	-0.258	4	-0.305	0.75186	0.8152	75
725	bromocriptine	-0.219	5	-0.277	0.75418	0.848	60
726	digoxin	-0.217	4	-0.304	0.75639	0.8571	50
727	letrozole	0.003	4	0.303	0.75798	0.625	50
728	quinethazone	-0.311	4	-0.303	0.75918	0.8158	50
729	dosulepin	-0.355	4	-0.302	0.76059	0.7607	75
730	pizotifen	-0.224	4	-0.302	0.76107	0.7672	75
731	desipramine	-0.335	4	-0.302	0.76162	0.8115	75
732	verapamil	-0.229	6	-0.252	0.76278	0.775	50
733	spaglumic acid	-0.243	2	-0.422	0.76355	0.8172	50
734	clofibrate	-0.234	2	-0.421	0.76532	0.6259	50
735	carcinine	-0.027	4	0.299	0.76825	0.64	50
736	dobutamine	-0.368	4	-0.3	0.76847	0.7826	75
737	tomatidine	-0.105	4	-0.3	0.76954	0.7892	50
738	rescinnamine	-0.263	3	-0.336	0.77316	0.7438	66
739	Prestwick-864	-0.36	4	-0.298	0.77499	0.7622	75
740	theobromine	0.083	4	0.297	0.77581	0.7035	50
741	adipiodone	-0.287	4	-0.297	0.77748	0.8045	50
742	hydrastine hydrochloride	-0.243	4	-0.296	0.78058	0.8343	50
743	fasudil	0.041	2	0.414	0.78452	0.7556	50
744	15(S)-15-methylprostaglandin E2	-0.233	4	-0.292	0.79274	0.7852	75
745	epirizole	-0.222	5	-0.266	0.79361	0.7665	60
746	aminocaproic acid	-0.197	3	-0.33	0.79395	0.8163	66
747	acetylsalicylsalicylic acid	-0.148	4	-0.291	0.79632	0.8254	75
748	selegiline	-0.216	4	-0.291	0.79685	0.7771	75
749	AR-A014418	-0.173	3	-0.329	0.79805	0.8047	66
750	cotinine	-0.298	6	-0.242	0.80027	0.9063	66
751	hyoscyamine	-0.265	5	-0.264	0.80036	0.7957	60
752	prasterone	-0.022	4	0.288	0.80208	0.8556	50
753	Prestwick-689	0.054	4	0.288	0.80322	0.8321	50
754	benzthiazide	-0.153	4	-0.289	0.80457	0.8418	50
755	ganciclovir	-0.226	4	-0.289	0.80513	0.774	75
756	dydrogesterone	-0.094	4	0.287	0.80573	0.8182	50
757	epivincamine	-0.268	4	-0.288	0.80767	0.8141	50
758	BCB000038	-0.259	4	-0.287	0.81052	0.8148	75
759	dimethadione	-0.158	4	-0.286	0.81259	0.8535	75
760	fluvastatin	-0.231	4	-0.285	0.81456	0.7708	75
761	protoveratrine A	-0.412	4	-0.284	0.81822	0.904	75
762	acacetin	-0.26	6	-0.236	0.82311	0.895	50
763	pentolonium	-0.136	5	-0.257	0.82421	0.7531	60
764	7-aminocephalosporanic acid	-0.167	4	-0.282	0.82431	0.7764	75
765	cisapride	-0.304	4	-0.281	0.82482	0.8231	50
766	abamectin	-0.298	4	-0.281	0.82534	0.8333	50
767	mestranol	-0.258	4	-0.28	0.82932	0.8134	50
768	lobeline	-0.157	4	-0.279	0.83109	0.8125	75
769	metrifonate	-0.198	5	-0.254	0.83196	0.8469	60
770	STOCK1N-35696	-0.012	2	0.395	0.83206	0.9096	50
771	mercaptopurine	-0.316	2	-0.393	0.83781	0.8836	50
772	digitoxigenin	-0.298	4	-0.274	0.84589	0.8726	50
773	hydrocotarnine	-0.158	4	-0.274	0.84589	0.9121	50
774	etifenin	-0.307	4	-0.274	0.84643	0.8448	50
775	sisomicin	-0.327	4	-0.272	0.85062	0.8507	50
776	telenzepine	-0.293	4	-0.271	0.85363	0.8218	50
777	amodiaquine	-0.272	4	-0.271	0.85669	0.9276	50
778	methylergometrine	-0.319	4	-0.271	0.85669	0.9167	50
779	sulfapyridine	-0.279	4	-0.27	0.8593	0.885	50
780	sulfabenzamide	-0.274	4	-0.269	0.85997	0.8728	50
781	clonidine	-0.231	4	-0.268	0.86383	0.763	50
782	conessine	-0.103	4	-0.267	0.86499	0.8571	50
783	dirithromycin	-0.347	3	-0.308	0.86892	0.8548	66
784	proxymetacaine	-0.196	4	-0.265	0.86972	0.8663	50
785	alcuronium chloride	-0.28	2	-0.377	0.87117	0.9096	50
786	phenformin	-0.241	7	-0.207	0.87348	0.8643	57
787	tamoxifen	-0.228	7	-0.207	0.87372	0.8889	57
788	nabumetone	-0.289	4	-0.263	0.87557	0.943	50
789	nalidixic acid	-0.309	5	-0.24	0.87654	0.8703	60
790	terguride	-0.112	8	-0.193	0.87703	0.8777	50
791	propantheline bromide	-0.173	4	-0.262	0.87814	0.8971	50
792	glimepiride	-0.095	4	-0.262	0.87895	0.8286	50
793	benzylpenicillin	-0.263	4	-0.262	0.87959	0.8729	50
794	betazole	-0.329	5	-0.239	0.87962	0.8462	60
795	boldine	-0.289	4	-0.259	0.88631	0.8597	50
796	dacarbazine	-0.18	4	-0.259	0.88753	0.9482	50
797	minaprine	-0.329	5	-0.234	0.89282	0.8868	60
798	benfotiamine	-0.241	5	-0.233	0.89388	0.9133	60
799	florfenicol	-0.183	4	-0.254	0.89797	0.8805	50
800	loxapine	-0.298	4	-0.254	0.89938	0.8871	50
801	tolmetin	-0.305	4	-0.253	0.90054	0.8659	50
802	palmatine	-0.125	4	-0.253	0.90131	0.9263	50
803	cyclopentolate	-0.29	4	-0.253	0.90155	0.9375	50
804	kanamycin	-0.28	4	-0.25	0.9063	0.9595	50
805	gallamine triethiodide	-0.212	5	-0.223	0.91998	0.9365	60
806	piperacetazine	-0.203	4	-0.245	0.92309	0.9197	50
807	octopamine	-0.282	4	-0.241	0.93268	0.9429	50
808	altretamine	-0.284	4	-0.239	0.93493	0.8917	50
809	progesterone	-0.207	4	-0.239	0.93581	0.9329	50
810	Prestwick-1085	-0.145	4	-0.239	0.93622	0.929	50
811	oxolinic acid	-0.209	5	-0.214	0.93834	0.9572	60
812	quinidine	-0.207	3	-0.275	0.94001	0.9096	66
813	alpha-ergocryptine	-0.176	6	-0.195	0.94327	0.9506	50
814	mifepristone	-0.287	4	-0.233	0.94808	0.9241	50
815	sulfadimidine	-0.104	6	-0.192	0.94897	0.9368	50
816	docosahexaenoic acid ethyl ester	-0.276	2	-0.328	0.95095	0.9492	50
817	H-89	-0.189	3	-0.268	0.95129	0.9351	66
818	SR-95531	-0.16	4	-0.231	0.95154	0.9693	50
819	methoxsalen	-0.352	3	-0.267	0.95343	0.9195	66
820	probenecid	-0.196	4	-0.23	0.95381	0.9383	50
821	lithocholic acid	-0.201	6	-0.188	0.95634	0.9638	50
822	sulfachlorpyridazine	-0.141	5	-0.203	0.95773	0.9817	60
823	Prestwick-1100	-0.172	4	-0.224	0.96348	0.9752	50
824	bupivacaine	-0.136	4	-0.221	0.96734	0.9198	50
825	F0447-0125	-0.114	4	-0.22	0.96927	0.9487	50
826	spironolactone	-0.223	5	-0.193	0.97365	0.9869	60
827	PHA-00816795	-0.066	2	0.308	0.9738	0.9655	50
828	bucladesine	-0.105	6	-0.175	0.97561	0.9663	50
829	sulfamethoxazole	-0.223	5	-0.189	0.97813	0.9731	60
830	tribenoside	-0.191	4	-0.21	0.98106	0.9837	50
831	caffeic acid	-0.238	3	-0.233	0.98634	0.9954	66
832	piracetam	-0.171	4	-0.198	0.98926	0.9634	50
833	pramocaine	-0.241	5	-0.177	0.98957	1	60
834	oxymetazoline	-0.179	4	-0.195	0.99079	0.988	50
835	R-atenolol	-0.106	4	-0.186	0.99455	0.9894	50
836	CP-863187	-0.119	4	-0.186	0.99467	1	50
837	nicardipine	-0.144	4	-0.185	0.99495	0.9807	50
838	salsolidin	-0.14	4	-0.183	0.99548	0.9935	50
839	CP-319743	-0.125	4	-0.18	0.99646	0.9907	50
840	tetroquinone	-0.163	4	-0.174	0.99781	1	50
841	fulvestrant	-0.164	40	-0.053	0.9994	1	50
842	DL-PPMP	0.905	1	0.998	---	---	100
843	decitabine	0.833	1	0.993	---	---	100
844	5186223	0.831	1	0.993	---	---	100
845	5109870	-0.835	1	-0.993	---	---	100
846	topiramate	0.759	1	0.978	---	---	100
847	5149715	0.665	1	0.931	---	---	100
848	dexverapamil	-0.703	1	-0.928	---	---	100
849	celastrol	-0.703	1	-0.928	---	---	100
850	12,13-EODE	0.642	1	0.917	---	---	100
851	BW-B70C	0.62	1	0.904	---	---	100
852	sulindac sulfide	0.603	1	0.891	---	---	100
853	5186324	0.591	1	0.883	---	---	100
854	PHA-00665752	-0.65	1	-0.872	---	---	100
855	1,5-isoquinolinediol	0.566	1	0.866	---	---	100
856	HC toxin	-0.641	1	-0.86	---	---	100
857	cytochalasin B	-0.638	1	-0.856	---	---	100
858	exemestane	0.518	1	0.836	---	---	100
859	cantharidin	-0.602	1	-0.807	---	---	100
860	splitomicin	0.451	1	0.802	---	---	100
861	dimethyloxalylglycine	-0.594	1	-0.794	---	---	100
862	tyrphostin AG-825	-0.586	1	-0.782	---	---	100
863	tomelukast	0	1	0.761	---	---	0
864	5114445	-0.567	1	-0.753	---	---	100
865	tioguanine	-0.561	1	-0.746	---	---	100
866	5162773	0	1	0.739	---	---	0
867	pararosaniline	-0.554	1	-0.736	---	---	100
868	5151277	0	1	0.734	---	---	0
869	carbimazole	0.256	3	0.717	---	---	33
870	tacrolimus	0	3	0.714	---	---	0
871	oxamic acid	-0.534	1	-0.711	---	---	100
872	Prestwick-1103	0.16	4	0.711	---	---	25
873	U0125	-0.534	1	-0.711	---	---	100
874	hexetidine	0.125	4	0.707	---	---	25
875	MG-132	-0.531	1	-0.706	---	---	100
876	bacitracin	0.186	3	0.703	---	---	33
877	3-aminobenzamide	-0.526	1	-0.699	---	---	100
878	dopamine	0	1	0.695	---	---	0
879	5213008	-0.523	1	-0.694	---	---	100
880	cloxacillin	0.142	4	0.683	---	---	25
881	ajmaline	0.21	3	0.683	---	---	33
882	isoxicam	0.289	5	0.678	---	---	40
883	gefitinib	-0.509	1	-0.674	---	---	100
884	HNMPA-(AM)3	0	1	0.672	---	---	0
885	thiamine	0	3	0.67	---	---	0
886	ampyrone	0.215	5	0.668	---	---	40
887	pheneticillin	0.154	4	0.66	---	---	25
888	diethylstilbestrol	0.171	6	0.652	---	---	33
889	paclitaxel	0.177	6	0.648	---	---	33
890	securinine	0.158	4	0.646	---	---	25
891	PF-00539745-00	0	3	0.634	---	---	0
892	dimenhydrinate	0.179	4	0.634	---	---	25
893	trihexyphenidyl	0.216	3	0.633	---	---	33
894	SC-560	0.207	3	0.628	---	---	33
895	penbutolol	0.154	3	0.618	---	---	33
896	PF-00539758-00	0.265	3	0.617	---	---	33
897	furosemide	0	4	0.601	---	---	0
898	Prestwick-675	0.177	4	0.597	---	---	25
899	bumetanide	0.186	4	0.596	---	---	25
900	trimethadione	0	4	0.595	---	---	0
901	trapidil	0.174	3	0.594	---	---	33
902	phenyl biguanide	0	1	0.591	---	---	0
903	nadide	0.17	4	0.588	---	---	25
904	ikarugamycin	0	3	0.587	---	---	0
905	cefotetan	0	3	0.584	---	---	0
906	5152487	0	1	0.583	---	---	0
907	oligomycin	0	1	0.581	---	---	0
908	ascorbic acid	0.141	4	0.58	---	---	25
909	CP-320650-01	0.14	8	0.579	---	---	37
910	2-deoxy-D-glucose	-0.411	1	-0.578	---	---	100
911	5140203	0	1	0.578	---	---	0
912	corticosterone	0.178	4	0.577	---	---	25
913	cobalt chloride	0	3	0.569	---	---	0
914	vanoxerine	0.147	4	0.566	---	---	25
915	tetracycline	0.214	5	0.564	---	---	40
916	chloroquine	0.102	4	0.561	---	---	25
917	diprophylline	0.239	5	0.56	---	---	40
918	N-phenylanthranilic acid	0	1	0.558	---	---	0
919	cinchonidine	0.147	4	0.557	---	---	25
920	AH-23848	0	3	0.554	---	---	0
921	arachidonic acid	0.158	3	0.554	---	---	33
922	nafcillin	0.206	4	0.554	---	---	25
923	Prestwick-981	0.147	3	0.551	---	---	33
924	etamivan	0	4	0.547	---	---	0
925	ramifenazone	0.167	4	0.545	---	---	25
926	dihydroergocristine	0.164	4	0.542	---	---	25
927	SC-58125	0	4	0.54	---	---	0
928	aztreonam	0.118	5	0.538	---	---	20
929	aminoglutethimide	0.199	3	0.534	---	---	33
930	demecolcine	0	1	0.533	---	---	0
931	oxantel	0.114	4	0.527	---	---	25
932	yohimbic acid	0.178	3	0.523	---	---	33
933	raubasine	0.168	4	0.522	---	---	25
934	phenanthridinone	0	1	-0.521	---	---	0
935	5286656	0	1	0.519	---	---	0
936	tacrine	0.168	4	0.516	---	---	25
937	tyrphostin AG-1478	0	1	0.515	---	---	0
938	fisetin	0	1	-0.515	---	---	0
939	5666823	0	1	0.513	---	---	0
940	ampicillin	0.14	4	0.505	---	---	25
941	betulin	0.19	3	0.504	---	---	33
942	diflunisal	0.135	5	0.503	---	---	20
943	(-)-catechin	0	1	0.503	---	---	0
944	hydrochlorothiazide	0.235	5	0.503	---	---	40
945	chlorogenic acid	0.06	4	0.501	---	---	25
946	propoxycaine	0.225	4	0.5	---	---	25
947	10-methoxyharmalan	0.156	4	0.499	---	---	25
948	cefalonium	0.13	3	0.498	---	---	33
949	coralyne	0.141	4	0.496	---	---	25
950	levomepromazine	-0.015	4	0.494	---	---	25
951	5182598	0	2	0.493	---	---	0
952	gibberellic acid	0.168	4	0.487	---	---	25
953	digoxigenin	0.028	5	0.484	---	---	20
954	dicloxacillin	0.214	4	0.483	---	---	25
955	ranitidine	0	5	0.481	---	---	0
956	triflupromazine	0.078	4	0.48	---	---	25
957	5155877	0.19	4	0.478	---	---	25
958	helveticoside	-0.075	6	0.477	---	---	0
959	metanephrine	0.123	5	0.477	---	---	40
960	nifenazone	-0.012	5	0.476	---	---	20
961	aminohippuric acid	0	4	0.476	---	---	0
962	oxprenolol	0	4	0.474	---	---	0
963	eticlopride	0.085	4	0.469	---	---	25
964	scoulerine	0.046	4	0.467	---	---	25
965	CP-690334-01	0.135	8	0.467	---	---	37
966	pheniramine	0.177	5	0.466	---	---	40
967	alprenolol	0.055	4	0.465	---	---	25
968	clindamycin	0.087	5	0.463	---	---	40
969	articaine	0.067	3	0.463	---	---	33
970	chlorhexidine	0.045	5	0.463	---	---	20
971	mephenytoin	-0.146	4	0.462	---	---	0
972	fenbendazole	0.017	4	0.461	---	---	25
973	altizide	0.055	4	0.459	---	---	25
974	cefotiam	0.023	4	0.458	---	---	25
975	Chicago Sky Blue 6B	0.048	4	0.457	---	---	25
976	ethionamide	0.076	3	0.456	---	---	33
977	ipratropium bromide	-0.22	3	-0.452	---	---	33
978	PHA-00851261E	0.08	8	0.449	---	---	25
979	cefapirin	0.029	4	0.449	---	---	25
980	zardaverine	0.045	4	0.448	---	---	25
981	meteneprost	0.053	4	0.448	---	---	25
982	clemastine	0.135	3	0.447	---	---	33
983	epitiostanol	0.057	4	0.446	---	---	25
984	pralidoxime	0.017	4	0.444	---	---	25
985	dexpanthenol	-0.096	4	0.443	---	---	0
986	isosorbide	-0.014	4	0.442	---	---	25
987	4-hydroxyphenazone	0.035	5	0.442	---	---	20
988	AG-012559	0.047	3	0.44	---	---	33
989	alverine	0.02	4	0.439	---	---	25
990	pronetalol	-0.098	4	0.439	---	---	0
991	naftidrofuryl	0.105	4	0.438	---	---	25
992	STOCK1N-28457	-0.176	3	-0.438	---	---	33
993	disulfiram	-0.078	5	0.437	---	---	0
994	co-dergocrine mesilate	0.02	4	0.437	---	---	25
995	nimesulide	-0.131	4	-0.435	---	---	25
996	carteolol	0.076	4	0.435	---	---	25
997	butacaine	0.097	4	0.434	---	---	25
998	staurosporine	-0.077	4	0.433	---	---	25
999	ioxaglic acid	0.066	3	0.432	---	---	33
1000	rilmenidine	0.056	4	0.432	---	---	25
1001	Prestwick-972	0.017	3	0.431	---	---	33
1002	midodrine	0.129	5	0.431	---	---	40
1003	leflunomide	-0.1	4	0.431	---	---	0
1004	dexpropranolol	-0.172	3	-0.429	---	---	33
1005	CAY-10397	-0.218	3	-0.429	---	---	33
1006	alfadolone	0.076	3	0.429	---	---	33
1007	dihydroergotamine	-0.041	5	0.428	---	---	20
1008	dropropizine	-0.102	4	0.427	---	---	0
1009	levodopa	0.044	5	0.427	---	---	20
1010	ofloxacin	0.114	5	0.426	---	---	40
1011	talampicillin	-0.182	4	-0.425	---	---	25
1012	calycanthine	0.089	4	0.425	---	---	25
1013	isocorydine	0.06	4	0.424	---	---	25
1014	harmol	-0.044	4	0.422	---	---	25
1015	N-acetyl-L-aspartic acid	0.019	4	0.421	---	---	25
1016	methanthelinium bromide	-0.103	4	0.421	---	---	0
1017	esculin	-0.009	4	0.421	---	---	25
1018	W-13	-0.207	2	0.421	---	---	0
1019	arachidonyltrifluoromethane	-0.207	2	0.419	---	---	0
1020	nitrofural	0.036	4	0.418	---	---	25
1021	tolfenamic acid	0.021	4	0.418	---	---	25
1022	minocycline	-0.026	5	0.418	---	---	20
1023	piperine	-0.053	4	0.417	---	---	25
1024	chlormezanone	-0.032	4	0.417	---	---	25
1025	strophanthidin	-0.12	4	0.417	---	---	0
1026	ceftazidime	-0.139	3	0.417	---	---	0
1027	decamethonium bromide	0.012	4	0.416	---	---	25
1028	ticarcillin	-0.193	3	-0.416	---	---	33
1029	naftopidil	-0.14	3	0.415	---	---	0
1030	proguanil	0.1	3	0.414	---	---	33
1031	parbendazole	0.019	4	0.414	---	---	25
1032	bergenin	-0.122	4	0.413	---	---	0
1033	pindolol	0.002	5	0.412	---	---	20
1034	mebhydrolin	-0.111	4	0.412	---	---	0
1035	carbenoxolone	0.071	4	0.411	---	---	25
1036	isoniazid	0.126	5	0.411	---	---	40
1037	mevalolactone	-0.208	3	0.41	---	---	0
1038	equilin	-0.061	5	0.41	---	---	20
1039	PHA-00846566E	0.032	3	0.408	---	---	33
1040	lisinopril	-0.164	3	-0.407	---	---	33
1041	amphotericin B	0.007	4	0.407	---	---	25
1042	kaempferol	0.013	4	0.406	---	---	25
1043	oxamniquine	0.036	4	0.405	---	---	25
1044	isometheptene	0.048	4	0.405	---	---	25
1045	nocodazole	0.012	6	0.404	---	---	16
1046	brinzolamide	0.089	4	0.404	---	---	25
1047	chloropyramine	-0.108	4	0.403	---	---	0
1048	nystatin	0.071	3	0.403	---	---	33
1049	CP-944629	-0.188	4	0.401	---	---	25
1050	lidocaine	0.14	5	0.401	---	---	40
1051	ifosfamide	-0.028	3	0.4	---	---	33
1052	cinoxacin	-0.127	4	-0.399	---	---	25
1053	butamben	0.015	4	0.399	---	---	25
1054	sulfaquinoxaline	0.004	3	0.398	---	---	33
1055	fosfosal	0.028	4	0.398	---	---	25
1056	doxylamine	-0.247	5	0.396	---	---	0
1057	meprylcaine	-0.031	4	0.393	---	---	25
1058	clopamide	0.027	4	0.392	---	---	25
1059	colchicine	-0.107	6	0.391	---	---	16
1060	alpha-yohimbine	0.043	3	0.389	---	---	33
1061	piroxicam	0.02	4	0.388	---	---	25
1062	hydroxyachillin	-0.007	4	0.386	---	---	25
1063	albendazole	-0.174	3	0.385	---	---	0
1064	SB-202190	-0.214	5	-0.383	---	---	40
1065	etodolac	0.112	5	0.383	---	---	40
1066	atovaquone	-0.208	3	-0.382	---	---	33
1067	3-acetylcoumarin	-0.098	5	0.382	---	---	0
1068	flunisolide	-0.269	6	0.381	---	---	0
1069	naproxen	0.232	9	0.381	---	---	44
1070	beclometasone	-0.153	3	0.381	---	---	0
1071	indapamide	-0.01	6	0.381	---	---	33
1072	pentetic acid	-0.07	5	0.38	---	---	20
1073	thiocolchicoside	-0.12	4	-0.379	---	---	25
1074	dexamethasone	0.065	8	0.379	---	---	25
1075	tiratricol	-0.157	4	-0.379	---	---	25
1076	moxonidine	-0.154	3	0.378	---	---	0
1077	5707885	-0.116	4	0.377	---	---	0
1078	fenspiride	-0.212	5	-0.376	---	---	40
1079	homatropine	0.153	5	0.376	---	---	40
1080	pirlindole	0.038	3	0.376	---	---	33
1081	orphenadrine	0.031	6	0.375	---	---	33
1082	iobenguane	-0.116	4	-0.374	---	---	25
1083	Prestwick-1080	-0.079	4	0.371	---	---	25
1084	etofylline	-0.243	5	-0.37	---	---	40
1085	naftifine	-0.064	4	0.369	---	---	25
1086	flumequine	-0.138	4	0.367	---	---	0
1087	celecoxib	-0.045	5	0.367	---	---	20
1088	sulindac	0.193	7	0.366	---	---	42
1089	azaperone	-0.229	4	0.365	---	---	0
1090	minoxidil	-0.025	5	0.365	---	---	40
1091	salsolinol	-0.225	3	-0.365	---	---	33
1092	clidinium bromide	-0.022	4	0.365	---	---	25
1093	praziquantel	-0.119	4	0.364	---	---	0
1094	trichlormethiazide	-0.149	4	-0.364	---	---	25
1095	harmaline	0.006	4	0.363	---	---	25
1096	lovastatin	-0.211	4	0.362	---	---	0
1097	famotidine	-0.039	5	0.36	---	---	20
1098	hydroxyzine	-0.055	5	0.359	---	---	20
1099	(+/-)-catechin	-0.05	4	0.358	---	---	25
1100	erastin	-0.084	4	0.358	---	---	25
1101	0317956-0000	-0.047	8	0.358	---	---	25
1102	thapsigargin	0.016	3	0.358	---	---	33
1103	tetramisole	-0.061	4	0.355	---	---	25
1104	pirenzepine	-0.181	5	0.353	---	---	0
1105	cinnarizine	-0.012	4	0.353	---	---	25
1106	metformin	0.002	10	0.352	---	---	20
1107	betamethasone	-0.252	3	0.351	---	---	0
1108	loracarbef	-0.015	4	0.35	---	---	25
1109	physostigmine	0.059	4	0.35	---	---	25
1110	amiloride	-0.247	5	-0.349	---	---	40
1111	acenocoumarol	-0.045	5	0.349	---	---	20
1112	hexylcaine	0.08	4	0.349	---	---	25
1113	piperacillin	-0.051	5	0.348	---	---	40
1114	Prestwick-920	-0.147	4	-0.347	---	---	25
1115	STOCK1N-35874	-0.245	2	0.346	---	---	0
1116	cefadroxil	-0.203	4	0.346	---	---	25
1117	suloctidil	-0.228	4	0.346	---	---	0
1118	hydrocortisone	-0.094	3	0.346	---	---	33
1119	picotamide	-0.161	5	-0.345	---	---	20
1120	dienestrol	-0.001	3	0.345	---	---	33
1121	sulfanilamide	-0.019	4	0.344	---	---	25
1122	sitosterol	-0.187	4	-0.343	---	---	25
1123	profenamine	-0.124	4	0.342	---	---	0
1124	PF-00562151-00	-0.003	8	0.342	---	---	25
1125	paroxetine	-0.044	4	0.341	---	---	25
1126	methocarbamol	-0.165	3	0.341	---	---	0
1127	metolazone	0.055	5	0.341	---	---	40
1128	lobelanidine	-0.001	4	0.34	---	---	25
1129	proadifen	-0.156	4	-0.34	---	---	25
1130	mecamylamine	-0.079	3	0.34	---	---	33
1131	mefenamic acid	-0.018	5	0.339	---	---	40
1132	procarbazine	-0.318	3	0.336	---	---	0
1133	clenbuterol	-0.193	5	-0.335	---	---	40
1134	sulfaguanidine	0.004	5	0.334	---	---	20
1135	rolipram	-0.162	4	0.334	---	---	0
1136	diflorasone	0.019	4	0.333	---	---	25
1137	spiramycin	0.055	6	0.333	---	---	33
1138	(-)-atenolol	-0.126	4	0.333	---	---	0
1139	phensuximide	-0.025	4	0.333	---	---	25
1140	neostigmine bromide	0.034	4	0.333	---	---	25
1141	diphemanil metilsulfate	0.134	5	0.332	---	---	40
1142	amylocaine	0.089	5	0.331	---	---	40
1143	amoxicillin	-0.126	4	0.329	---	---	0
1144	tolnaftate	0.121	5	0.329	---	---	40
1145	(-)-isoprenaline	-0.112	4	0.328	---	---	25
1146	citiolone	-0.171	6	-0.327	---	---	33
1147	pipemidic acid	-0.24	3	0.326	---	---	0
1148	gliquidone	0.033	4	0.326	---	---	25
1149	fluoxetine	-0.069	4	0.324	---	---	25
1150	sodium phenylbutyrate	0.15	7	0.324	---	---	42
1151	pyrantel	0.009	5	0.323	---	---	20
1152	0225151-0000	-0.122	3	0.322	---	---	33
1153	triamcinolone	0.128	5	0.321	---	---	40
1154	crotamiton	-0.34	4	0.321	---	---	0
1155	hecogenin	-0.136	4	-0.321	---	---	25
1156	tridihexethyl	-0.133	4	0.32	---	---	25
1157	dextromethorphan	-0.177	4	-0.32	---	---	25
1158	thalidomide	-0.299	7	-0.319	---	---	42
1159	prednicarbate	0.025	3	0.318	---	---	33
1160	Trolox C	-0.037	4	0.316	---	---	25
1161	proscillaridin	-0.198	3	0.316	---	---	0
1162	allantoin	0.056	5	0.315	---	---	40
1163	oleandomycin	-0.139	5	0.315	---	---	0
1164	morantel	-0.236	5	-0.313	---	---	40
1165	chlorphenamine	-0.023	4	0.313	---	---	25
1166	LM-1685	-0.212	3	-0.312	---	---	33
1167	buspirone	-0.147	4	-0.312	---	---	25
1168	foliosidine	-0.072	6	0.311	---	---	16
1169	yohimbine	0.112	5	0.311	---	---	40
1170	tremorine	0.022	4	0.31	---	---	25
1171	3-hydroxy-DL-kynurenine	0.074	6	0.309	---	---	33
1172	glycopyrronium bromide	-0.233	5	-0.308	---	---	40
1173	risperidone	-0.052	3	-0.305	---	---	33
1174	captopril	-0.089	5	0.305	---	---	20
1175	PNU-0293363	-0.059	3	-0.305	---	---	33
1176	orlistat	-0.117	5	0.305	---	---	20
1177	oxedrine	-0.115	4	0.304	---	---	25
1178	carisoprodol	-0.131	4	0.304	---	---	0
1179	quipazine	0.049	4	0.304	---	---	25
1180	perphenazine	-0.212	5	-0.303	---	---	40
1181	tolazoline	0.052	5	0.303	---	---	20
1182	NS-398	0.028	3	0.302	---	---	33
1183	benzydamine	-0.171	4	0.302	---	---	0
1184	bendroflumethiazide	-0.163	6	-0.302	---	---	33
1185	spectinomycin	-0.134	4	-0.301	---	---	25
1186	valdecoxib	-0.042	3	0.301	---	---	33
1187	idoxuridine	-0.135	5	0.3	---	---	20
1188	novobiocin	0.111	9	0.296	---	---	44
1189	cyproheptadine	-0.238	5	-0.296	---	---	40
1190	metacycline	-0.154	4	0.294	---	---	25
1191	diclofenac	-0.225	5	-0.293	---	---	40
1192	pimethixene	-0.186	3	-0.292	---	---	33
1193	fenoterol	-0.216	3	0.292	---	---	0
1194	L-methionine sulfoximine	-0.109	4	0.291	---	---	25
1195	dehydrocholic acid	0.017	5	0.29	---	---	40
1196	tubocurarine chloride	0.009	4	0.29	---	---	25
1197	fendiline	-0.178	3	0.289	---	---	0
1198	cimetidine	-0.056	5	0.289	---	---	20
1199	monastrol	-0.068	8	0.288	---	---	25
1200	mebeverine	-0.262	4	0.288	---	---	0
1201	butyl hydroxybenzoate	-0.226	5	-0.287	---	---	40
1202	pirinixic acid	-0.225	5	-0.287	---	---	40
1203	lidoflazine	0.046	3	0.286	---	---	33
1204	ciclosporin	-0.046	6	0.285	---	---	33
1205	benfluorex	-0.132	4	0.285	---	---	25
1206	0316684-0000	0.013	4	0.285	---	---	25
1207	ozagrel	-0.181	4	0.284	---	---	0
1208	pentetrazol	-0.029	4	0.284	---	---	25
1209	ethambutol	-0.154	5	0.283	---	---	20
1210	Prestwick-984	-0.14	4	0.281	---	---	0
1211	chlortetracycline	-0.041	5	0.281	---	---	20
1212	monorden	0.073	22	0.281	---	---	36
1213	harman	-0.01	4	0.28	---	---	25
1214	eldeline	-0.112	6	0.28	---	---	33
1215	dorzolamide	-0.11	4	0.279	---	---	25
1216	gemfibrozil	-0.184	5	0.279	---	---	20
1217	dihydrostreptomycin	-0.104	5	0.278	---	---	20
1218	sulfadoxine	-0.09	3	0.277	---	---	33
1219	geldanamycin	0.082	15	0.276	---	---	40
1220	asiaticoside	-0.109	4	0.274	---	---	25
1221	pinacidil	-0.139	4	0.274	---	---	0
1222	amitriptyline	-0.312	6	0.273	---	---	0
1223	cyclopenthiazide	-0.152	4	0.272	---	---	25
1224	phentolamine	-0.045	7	0.272	---	---	28
1225	velnacrine	0.005	4	0.271	---	---	25
1226	tiabendazole	-0.067	4	0.27	---	---	25
1227	benserazide	-0.225	5	0.27	---	---	0
1228	hesperidin	-0.144	4	0.27	---	---	25
1229	16,16-dimethylprostaglandin E2	-0.163	3	0.269	---	---	33
1230	SB-203580	0.023	5	0.269	---	---	40
1231	ketorolac	-0.104	4	0.269	---	---	25
1232	terbutaline	-0.187	4	-0.267	---	---	25
1233	sulfadiazine	-0.068	5	0.266	---	---	20
1234	tiapride	-0.232	5	-0.265	---	---	40
1235	guaifenesin	0.004	6	0.265	---	---	33
1236	vitexin	-0.04	4	0.265	---	---	25
1237	atropine oxide	-0.112	5	0.265	---	---	20
1238	nicotinic acid	-0.02	4	0.265	---	---	25
1239	tinidazole	-0.031	6	0.264	---	---	33
1240	paromomycin	-0.122	4	0.263	---	---	25
1241	hydroflumethiazide	0.041	5	0.263	---	---	40
1242	ergocalciferol	-0.056	4	0.263	---	---	25
1243	glafenine	-0.142	4	0.262	---	---	25
1244	ciprofibrate	-0.075	4	0.261	---	---	25
1245	benzamil	-0.09	6	0.26	---	---	16
1246	sulfasalazine	-0.257	5	-0.26	---	---	40
1247	dyclonine	-0.165	4	0.259	---	---	25
1248	naphazoline	-0.175	5	0.258	---	---	20
1249	sulfaphenazole	-0.049	4	0.256	---	---	25
1250	ciprofloxacin	-0.192	5	-0.252	---	---	40
1251	orciprenaline	-0.145	4	0.252	---	---	25
1252	(+)-isoprenaline	-0.157	4	0.25	---	---	25
1253	ribostamycin	-0.045	4	0.249	---	---	25
1254	SC-19220	-0.034	4	0.249	---	---	25
1255	dinoprostone	-0.058	4	0.249	---	---	25
1256	ramipril	-0.14	4	0.249	---	---	25
1257	sotalol	0.06	4	0.248	---	---	25
1258	amoxapine	-0.266	5	-0.248	---	---	40
1259	androsterone	-0.08	4	0.247	---	---	25
1260	domperidone	-0.03	4	0.247	---	---	25
1261	2,6-dimethylpiperidine	-0.148	5	0.246	---	---	20
1262	erythromycin	-0.077	5	0.244	---	---	20
1263	flutamide	-0.179	5	-0.244	---	---	40
1264	mometasone	-0.162	4	0.243	---	---	25
1265	hydrastinine	-0.115	5	0.243	---	---	20
1266	apramycin	-0.13	4	0.241	---	---	25
1267	niflumic acid	-0.156	4	0.241	---	---	25
1268	droperidol	-0.136	4	0.239	---	---	25
1269	proglumide	-0.205	5	0.238	---	---	20
1270	tolbutamide	-0.233	7	0.237	---	---	14
1271	prednisolone	-0.218	5	0.235	---	---	20
1272	SR-95639A	-0.274	4	0.233	---	---	0
1273	AG-013608	-0.134	8	-0.231	---	---	37
1274	alvespimycin	0.002	12	0.226	---	---	41
1275	rofecoxib	-0.165	6	0.223	---	---	16
1276	cefuroxime	-0.128	4	0.223	---	---	25
1277	PF-00875133-00	-0.146	3	0.222	---	---	33
1278	amrinone	-0.109	4	0.221	---	---	25
1279	ketoconazole	-0.126	4	0.215	---	---	25
1280	rosiglitazone	0.001	14	0.213	---	---	35
1281	sulfathiazole	-0.146	5	-0.212	---	---	40
1282	suxibuzone	-0.136	4	0.212	---	---	25
1283	nilutamide	-0.128	4	0.211	---	---	25
1284	amikacin	-0.13	4	0.211	---	---	25
1285	metitepine	-0.108	4	0.206	---	---	25
1286	amprolium	-0.134	5	-0.205	---	---	40
1287	pioglitazone	-0.059	11	0.204	---	---	18
1288	BAS-012416453	-0.044	3	0.202	---	---	33
1289	lynestrenol	-0.168	5	-0.201	---	---	40
1290	raloxifene	-0.059	7	0.201	---	---	28
1291	indometacin	-0.144	8	0.2	---	---	12
1292	glipizide	-0.106	5	0.197	---	---	20
1293	moracizine	-0.117	4	0.194	---	---	25
1294	azathioprine	-0.095	7	0.191	---	---	28
1295	thiethylperazine	-0.128	4	0.19	---	---	25
1296	midecamycin	-0.16	5	-0.189	---	---	40
1297	nifedipine	-0.032	7	0.189	---	---	28
1298	carbinoxamine	-0.133	4	0.189	---	---	25
1299	dexibuprofen	-0.132	4	0.182	---	---	25
1300	metoclopramide	-0.157	6	0.18	---	---	16
1301	glycocholic acid	-0.098	4	0.177	---	---	25
1302	haloperidol	-0.021	32	0.173	---	---	34
1303	tanespimycin	-0.117	62	0.173	---	---	20
1304	wortmannin	-0.041	18	0.171	---	---	27
1305	methyldopa	-0.12	5	0.158	---	---	20
1306	troglitazone	-0.116	16	-0.157	---	---	43
1307	clozapine	-0.054	17	0.157	---	---	23
1308	mexiletine	-0.136	6	0.152	---	---	16
1309	valproic acid	-0.066	57	0.109	---	---	26

## Sheet: by cmap name and cell line
rank	cmap name and cell line	mean	n	enrichment	p	specificity	percent non-null
1	resveratrol - MCF7	-0.779	6	-0.887	0	0.0082	100
2	trichostatin A - PC3	-0.575	55	-0.563	0	0.2184	89
3	trichostatin A - MCF7	-0.407	92	-0.349	0	0.604	75
4	etoposide - MCF7	-0.893	2	-0.995	8e-05	0.0167	100
5	phenoxybenzamine - MCF7	-0.787	3	-0.964	0.00012	0.0092	100
6	methyldopate - MCF7	0.833	2	0.989	0.00016	0	100
7	dapsone - MCF7	0.811	2	0.988	0.00018	0	100
8	estradiol - MCF7	0.309	19	0.476	0.00018	0.0405	63
9	alpha-estradiol - MCF7	-0.591	9	-0.658	0.00026	0.0118	100
10	trifluoperazine - PC3	-0.737	3	-0.94	0.00032	0.0517	100
11	tretinoin - MCF7	-0.533	13	-0.559	0.00032	0.0414	84
12	iopamidol - MCF7	0.796	2	0.982	0.00062	0	100
13	metronidazole - MCF7	0.8	2	0.981	0.00062	0	100
14	naringenin - MCF7	0.836	2	0.98	0.0007	0.0164	100
15	15-delta prostaglandin J2 - MCF7	-0.617	8	-0.647	0.00092	0.0621	87
16	harpagoside - MCF7	0.786	2	0.976	0.00093	0	100
17	prochlorperazine - MCF7	-0.63	9	-0.611	0.00094	0.0541	100
18	fludrocortisone - MCF7	0.579	5	0.785	0.00104	0.0115	100
19	adiphenine - MCF7	0.776	2	0.972	0.00123	0.0059	100
20	myricetin - MCF7	0.763	2	0.972	0.00125	0	100
21	methotrexate - MCF7	-0.748	3	-0.909	0.00134	0.0775	100
22	seneciphylline - MCF7	-0.776	2	-0.974	0.00139	0.0216	100
23	estradiol - HL60	0.307	8	0.627	0.00154	0.0984	50
24	sulconazole - MCF7	-0.806	2	-0.972	0.00159	0	100
25	vorinostat - MCF7	-0.599	7	-0.653	0.00182	0.3107	100
26	MS-275 - PC3	-0.768	2	-0.97	0.00185	0.0988	100
27	benzathine benzylpenicillin - MCF7	0.772	2	0.963	0.00239	0.0114	100
28	LY-294002 - MCF7	-0.387	34	-0.305	0.00244	0.5	73
29	Prestwick-642 - MCF7	0.742	2	0.962	0.00249	0.0058	100
30	fluphenazine - PC3	-0.724	3	-0.89	0.00258	0.0513	100
31	chrysin - MCF7	-0.779	2	-0.96	0.00352	0.0054	100
32	trifluoperazine - MCF7	-0.511	9	-0.552	0.00386	0.0865	77
33	ambroxol - MCF7	0.837	2	0.952	0.0041	0.0171	100
34	simvastatin - MCF7	-0.744	2	-0.954	0.00453	0.0071	100
35	gentamicin - PC3	0.714	2	0.95	0.00465	0	100
36	trioxysalen - MCF7	-0.773	2	-0.953	0.00467	0.0171	100
37	0175029-0000 - PC3	-0.648	4	-0.781	0.00475	0.071	100
38	3-acetamidocoumarin - MCF7	0.781	2	0.949	0.00477	0.0183	100
39	apigenin - MCF7	-0.764	2	-0.952	0.00485	0.0183	100
40	LY-294002 - PC3	-0.517	12	-0.477	0.00493	0.2544	91
41	PHA-00745360 - MCF7	0.507	4	0.77	0.00539	0.0171	75
42	canadine - MCF7	0.723	2	0.946	0.00555	0.0153	100
43	adiphenine - PC3	0.719	2	0.945	0.00567	0.0466	100
44	pyrvinium - MCF7	-0.73	4	-0.77	0.00567	0.1196	100
45	quinpirole - MCF7	0.664	3	0.854	0.00593	0.0062	100
46	chlorcyclizine - PC3	-0.723	2	-0.945	0.00658	0.0196	100
47	isoxicam - PC3	0.723	2	0.94	0.00698	0.0111	100
48	acepromazine - MCF7	-0.778	2	-0.943	0.00706	0.025	100
49	clioquinol - MCF7	-0.698	3	-0.845	0.00747	0.0074	100
50	zalcitabine - MCF7	0.73	2	0.938	0.00755	0.0286	100
51	guanadrel - MCF7	0.706	2	0.937	0.00771	0.0253	100
52	emetine - MCF7	-0.757	2	-0.939	0.00779	0.0944	100
53	lycorine - MCF7	0.544	3	0.84	0.00803	0.0327	100
54	genistein - MCF7	0.284	11	0.475	0.0081	0.1627	63
55	sirolimus - MCF7	-0.333	25	-0.324	0.00824	0.5	68
56	atractyloside - PC3	0.733	2	0.934	0.00833	0.0172	100
57	vinburnine - MCF7	0.675	2	0.934	0.00833	0.0206	100
58	nortriptyline - MCF7	-0.732	2	-0.935	0.00875	0.036	100
59	amylocaine - MCF7	0.728	2	0.931	0.00901	0.0294	100
60	fluticasone - MCF7	0.724	2	0.93	0.00942	0.0343	100
61	timolol - MCF7	0.62	3	0.832	0.00953	0.0061	100
62	cetirizine - MCF7	-0.743	2	-0.931	0.00984	0.0053	100
63	clotrimazole - MCF7	-0.695	3	-0.827	0.01028	0.0397	100
64	levopropoxyphene - MCF7	0.702	2	0.926	0.01046	0.0173	100
65	sodium phenylbutyrate - MCF7	0.695	3	0.827	0.01052	0.0473	100
66	guanfacine - MCF7	-0.673	3	-0.826	0.01062	0.0121	100
67	thiamphenicol - PC3	0.683	2	0.925	0.01084	0.0273	100
68	chlorpromazine - MCF7	-0.496	11	-0.465	0.01087	0.0315	81
69	pentoxifylline - PC3	0.681	2	0.925	0.01097	0.011	100
70	xamoterol - MCF7	0.739	2	0.922	0.01199	0.0276	100
71	CP-320650-01 - PC3	0.299	4	0.721	0.01221	0.0739	50
72	alclometasone - MCF7	-0.761	2	-0.922	0.01247	0.012	100
73	felodipine - MCF7	-0.659	5	-0.652	0.01252	0.0826	100
74	imipramine - MCF7	-0.698	2	-0.921	0.01255	0.0144	100
75	betulinic acid - MCF7	0.684	2	0.92	0.01255	0.037	100
76	calcium folinate - MCF7	0.656	2	0.917	0.01364	0.027	100
77	sulfamonomethoxine - MCF7	0.742	2	0.916	0.01404	0.0325	100
78	pyrithyldione - MCF7	0.654	2	0.915	0.01433	0.0412	100
79	betahistine - MCF7	-0.741	2	-0.915	0.01467	0.0168	100
80	naproxen - MCF7	0.494	4	0.708	0.01512	0.0988	75
81	metampicillin - PC3	0.662	2	0.912	0.01537	0.0378	100
82	resveratrol - PC3	-0.705	2	-0.912	0.01551	0.0081	100
83	0173570-0000 - PC3	-0.585	4	-0.702	0.01643	0.1032	75
84	pivmecillinam - MCF7	0.677	2	0.909	0.01682	0.0357	100
85	dipyridamole - MCF7	-0.669	3	-0.795	0.01749	0.04	100
86	khellin - MCF7	0.647	2	0.908	0.01773	0.0385	100
87	vorinostat - PC3	-0.689	2	-0.906	0.01781	0.1333	100
88	bromperidol - MCF7	-0.781	2	-0.905	0.01809	0.0065	100
89	tobramycin - MCF7	-0.715	2	-0.904	0.01845	0.0199	100
90	cinchonine - MCF7	0.678	2	0.905	0.01847	0.0385	100
91	vincamine - MCF7	0.55	3	0.79	0.01865	0.0216	100
92	clemizole - PC3	-0.678	2	-0.902	0.01911	0.012	100
93	viomycin - MCF7	0.685	2	0.902	0.01948	0.0563	100
94	puromycin - MCF7	-0.726	2	-0.901	0.01966	0.2064	100
95	cloperastine - PC3	-0.694	2	-0.9	0.01984	0.0597	100
96	ketotifen - MCF7	0.653	2	0.901	0.02026	0.0649	100
97	luteolin - MCF7	-0.745	2	-0.899	0.0203	0.0476	100
98	methacholine chloride - MCF7	-0.711	2	-0.899	0.02042	0.0389	100
99	medrysone - MCF7	-0.704	3	-0.784	0.02057	0.0578	100
100	rotenone - PC3	0.661	2	0.9	0.02064	0.0351	100
101	diloxanide - MCF7	0.632	2	0.899	0.02097	0.0564	100
102	iohexol - MCF7	0.631	2	0.898	0.02129	0.0688	100
103	alexidine - PC3	-0.718	2	-0.897	0.02131	0.0769	100
104	trimethylcolchicinic acid - MCF7	-0.677	2	-0.896	0.02159	0.0337	100
105	Prestwick-691 - MCF7	0.635	2	0.897	0.02181	0.0349	100
106	thioguanosine - MCF7	-0.683	2	-0.895	0.02207	0.0606	100
107	iopanoic acid - MCF7	0.673	2	0.896	0.02261	0.0299	100
108	deferoxamine - MCF7	-0.567	5	-0.615	0.02323	0.0435	100
109	thalidomide - PC3	-0.679	2	-0.891	0.02382	0.0297	100
110	5248896 - MCF7	-0.801	2	-0.89	0.0241	0.0197	100
111	isocarboxazid - PC3	0.611	2	0.891	0.02463	0.0124	100
112	gabexate - MCF7	0.676	2	0.891	0.02479	0.0194	100
113	heptaminol - MCF7	0.64	2	0.89	0.02525	0.0458	100
114	clomifene - MCF7	-0.71	2	-0.887	0.02557	0.1128	100
115	diazoxide - MCF7	0.629	2	0.889	0.02559	0.0552	100
116	medrysone - PC3	-0.718	2	-0.885	0.02624	0.055	100
117	finasteride - MCF7	0.399	3	0.763	0.02646	0.1234	66
118	antimycin A - MCF7	-0.698	2	-0.885	0.02656	0.0594	100
119	0297417-0002B - MCF7	-0.668	2	-0.884	0.0267	0.1259	100
120	chlortalidone - MCF7	0.597	2	0.885	0.02714	0.0608	100
121	bepridil - MCF7	-0.679	2	-0.883	0.02732	0.088	100
122	astemizole - PC3	-0.68	2	-0.883	0.02744	0.125	100
123	bacampicillin - MCF7	0.684	2	0.883	0.02811	0.0678	100
124	meticrane - PC3	-0.677	2	-0.88	0.02883	0.0704	100
125	nadolol - MCF7	0.59	2	0.88	0.02899	0.0628	100
126	pentoxifylline - MCF7	0.627	2	0.88	0.02903	0.0248	100
127	methylbenzethonium chloride - PC3	-0.691	2	-0.88	0.02915	0.1197	100
128	clorgiline - MCF7	-0.674	2	-0.878	0.03004	0.0667	100
129	zuclopenthixol - MCF7	0.613	2	0.875	0.03131	0.0846	100
130	N6-methyladenosine - MCF7	0.781	2	0.875	0.03149	0.0729	100
131	nisoxetine - MCF7	-0.687	2	-0.874	0.03171	0.0452	100
132	milrinone - MCF7	-0.659	2	-0.874	0.03177	0.067	100
133	dipyridamole - PC3	-0.659	2	-0.873	0.03201	0.0113	100
134	blebbistatin - MCF7	-0.745	2	-0.873	0.03217	0.0608	100
135	suramin sodium - PC3	0.575	2	0.873	0.03292	0.0523	100
136	moroxydine - MCF7	0.593	2	0.872	0.03304	0.0533	100
137	aciclovir - PC3	0.597	2	0.872	0.03316	0.023	100
138	lisuride - MCF7	0.657	2	0.871	0.03386	0.0973	100
139	methoxamine - MCF7	0.769	2	0.869	0.03515	0.0735	100
140	piromidic acid - MCF7	-0.68	2	-0.867	0.03569	0.0562	100
141	tolnaftate - MCF7	0.702	2	0.868	0.03579	0.0977	100
142	harmine - MCF7	-0.718	2	-0.865	0.03628	0.0813	100
143	sulfacetamide - PC3	0.577	2	0.867	0.03632	0.0597	100
144	estradiol - ssMCF7	0.582	2	0.866	0.0366	0.0435	100
145	cefaclor - MCF7	0.613	2	0.866	0.03672	0.0622	100
146	folic acid - MCF7	0.636	2	0.865	0.03694	0.0419	100
147	monobenzone - MCF7	-0.65	2	-0.863	0.03746	0.0685	100
148	chlorambucil - PC3	-0.678	2	-0.863	0.0376	0.0305	100
149	prochlorperazine - PC3	-0.626	3	-0.736	0.03764	0.0917	100
150	hydroflumethiazide - PC3	0.651	2	0.863	0.03801	0.0506	100
151	DL-thiorphan - MCF7	-0.669	2	-0.861	0.03845	0.0682	100
152	zidovudine - MCF7	-0.702	2	-0.861	0.03857	0.0345	100
153	Prestwick-674 - MCF7	-0.642	3	-0.734	0.0386	0.0893	100
154	amiodarone - MCF7	-0.591	3	-0.732	0.0395	0.1299	100
155	cefotaxime - PC3	0.56	2	0.86	0.03956	0.0347	100
156	fluspirilene - MCF7	-0.694	2	-0.859	0.03976	0.1748	100
157	scriptaid - PC3	-0.643	2	-0.857	0.04072	0.1596	100
158	thioperamide - MCF7	0.438	3	0.724	0.04102	0.1044	66
159	camptothecin - MCF7	-0.698	2	-0.857	0.04113	0.2473	100
160	diphenhydramine - MCF7	0.629	2	0.857	0.04123	0.0803	100
161	stachydrine - MCF7	0.68	2	0.857	0.04157	0.0432	100
162	6-azathymine - MCF7	-0.697	2	-0.856	0.04181	0.0511	100
163	sulfamethizole - MCF7	-0.689	2	-0.855	0.04181	0.0204	100
164	lisuride - PC3	0.557	2	0.856	0.04231	0.0222	100
165	ivermectin - MCF7	-0.685	2	-0.854	0.04269	0.1228	100
166	sulfametoxydiazine - MCF7	-0.724	2	-0.853	0.04273	0.0361	100
167	N-acetyl-L-leucine - MCF7	-0.644	2	-0.853	0.04306	0.0447	100
168	bretylium tosilate - MCF7	0.57	2	0.854	0.04338	0.0637	100
169	acebutolol - MCF7	0.665	2	0.853	0.0434	0.0377	100
170	lansoprazole - MCF7	0.641	2	0.853	0.04374	0.0563	100
171	GW-8510 - MCF7	-0.651	2	-0.851	0.04463	0.25	100
172	tranexamic acid - MCF7	0.585	2	0.851	0.04499	0.1078	100
173	trimethoprim - PC3	0.645	2	0.85	0.04505	0.0392	100
174	vinblastine - MCF7	0.639	2	0.85	0.04529	0.0828	100
175	cefoxitin - MCF7	0.575	2	0.849	0.04575	0	100
176	arecoline - MCF7	0.55	2	0.849	0.04585	0.0658	100
177	pentoxyverine - MCF7	-0.677	2	-0.847	0.04688	0.0415	100
178	bambuterol - MCF7	0.581	2	0.847	0.0475	0.0643	100
179	trimipramine - MCF7	-0.704	2	-0.846	0.04778	0.0677	100
180	geldanamycin - MCF7	0.201	10	0.41	0.04975	0.5028	50
181	procyclidine - MCF7	-0.645	2	-0.839	0.05159	0.0952	100
182	guanabenz - MCF7	0.545	2	0.839	0.05187	0.0398	100
183	troglitazone - HL60	0.453	4	0.621	0.05218	0.0698	75
184	thioridazine - PC3	-0.56	5	-0.557	0.05261	0.2755	80
185	trimethobenzamide - MCF7	0.638	2	0.838	0.05275	0.1131	100
186	monensin - PC3	0.623	2	0.838	0.05306	0.1341	100
187	megestrol - MCF7	0.532	2	0.836	0.054	0.0809	100
188	homochlorcyclizine - MCF7	-0.681	2	-0.835	0.05416	0.1694	100
189	hycanthone - MCF7	-0.751	2	-0.835	0.0545	0.1157	100
190	Prestwick-692 - MCF7	0.567	2	0.835	0.05485	0.125	100
191	clofazimine - MCF7	0.465	3	0.697	0.05486	0.2081	66
192	mafenide - MCF7	0.56	2	0.832	0.05662	0.0411	100
193	benzocaine - MCF7	0.662	2	0.832	0.05668	0.0614	100
194	pimozide - MCF7	-0.71	2	-0.83	0.05724	0.1743	100
195	moxisylyte - MCF7	-0.653	2	-0.829	0.0577	0.0914	100
196	benzethonium chloride - MCF7	-0.648	2	-0.828	0.05799	0.127	100
197	midodrine - PC3	0.531	2	0.83	0.05809	0.1083	100
198	rottlerin - MCF7	-0.586	3	-0.693	0.05827	0.1597	100
199	wortmannin - MCF7	0.183	10	0.401	0.05843	0.5305	50
200	atropine - MCF7	-0.652	2	-0.826	0.05968	0.0681	100
201	ribavirin - MCF7	0.611	2	0.827	0.06074	0.0732	100
202	azacyclonol - PC3	-0.687	2	-0.824	0.06098	0.1416	100
203	trifluridine - MCF7	-0.682	2	-0.824	0.0611	0.0938	100
204	baclofen - MCF7	0.546	2	0.825	0.06201	0.0617	100
205	demecarium bromide - MCF7	0.556	2	0.824	0.06227	0.0581	100
206	IC-86621 - PC3	0.602	2	0.824	0.06261	0.0566	100
207	enilconazole - MCF7	-0.692	2	-0.821	0.06289	0.0803	100
208	2-aminobenzenesulfonamide - MCF7	0.495	2	0.822	0.06392	0.0194	100
209	Prestwick-967 - MCF7	0.593	2	0.822	0.0641	0.0649	100
210	delsoline - MCF7	-0.628	2	-0.818	0.06569	0.0488	100
211	procainamide - MCF7	-0.618	2	-0.817	0.06619	0.0974	100
212	furaltadone - MCF7	-0.527	3	-0.68	0.06642	0.142	100
213	tanespimycin - PC3	-0.31	12	-0.361	0.06665	0.4559	58
214	nordihydroguaiaretic acid - MCF7	-0.392	8	-0.436	0.06693	0.123	75
215	roxithromycin - MCF7	-0.616	2	-0.816	0.06754	0.113	100
216	flucytosine - MCF7	-0.613	2	-0.815	0.06786	0.0546	100
217	oxaprozin - MCF7	-0.543	4	-0.599	0.06793	0.1127	100
218	glibenclamide - MCF7	-0.633	2	-0.815	0.06805	0.0725	100
219	quinostatin - MCF7	-0.738	2	-0.814	0.06833	0.3053	100
220	fulvestrant - MCF7	-0.33	21	-0.274	0.0694	0.6131	66
221	sulfafurazole - MCF7	-0.609	3	-0.673	0.07023	0.2389	100
222	nizatidine - MCF7	0.594	2	0.813	0.07062	0.1465	100
223	0179445-0000 - MCF7	-0.502	4	-0.594	0.07197	0.156	75
224	carbarsone - MCF7	-0.624	2	-0.809	0.07225	0.133	100
225	benperidol - MCF7	-0.619	2	-0.809	0.07255	0.1006	100
226	galantamine - MCF7	-0.624	2	-0.808	0.07283	0.1451	100
227	15-delta prostaglandin J2 - PC3	-0.603	3	-0.668	0.07369	0.1644	100
228	0175029-0000 - MCF7	-0.71	2	-0.807	0.07388	0.1193	100
229	Prestwick-559 - MCF7	-0.646	2	-0.806	0.0741	0.1529	100
230	naltrexone - MCF7	0.498	2	0.808	0.07446	0.0714	100
231	isoconazole - PC3	-0.66	2	-0.805	0.07495	0.0719	100
232	pyridoxine - MCF7	-0.655	2	-0.804	0.07569	0.2184	100
233	astemizole - MCF7	-0.623	2	-0.804	0.07597	0.2041	100
234	pheniramine - MCF7	0.603	2	0.806	0.07601	0.118	100
235	norcyclobenzaprine - MCF7	-0.664	2	-0.803	0.07623	0.1221	100
236	corynanthine - MCF7	-0.676	2	-0.803	0.07652	0.1	100
237	pyrimethamine - MCF7	-0.624	2	-0.802	0.077	0.0676	100
238	indoprofen - MCF7	0.511	2	0.805	0.07706	0.1437	100
239	bemegride - MCF7	0.6	2	0.805	0.07712	0.0656	100
240	meclofenamic acid - MCF7	0.654	2	0.805	0.07734	0.0581	100
241	Prestwick-682 - MCF7	0.58	2	0.805	0.07746	0.0764	100
242	cortisone - MCF7	-0.644	2	-0.8	0.07849	0.1228	100
243	tomatidine - MCF7	-0.661	2	-0.8	0.07865	0.1895	100
244	amantadine - MCF7	0.681	2	0.802	0.07941	0.1212	100
245	daunorubicin - MCF7	-0.68	3	-0.658	0.07962	0.2453	100
246	thiostrepton - MCF7	-0.716	2	-0.797	0.08034	0.1981	100
247	molindone - MCF7	0.509	2	0.801	0.0804	0.0833	100
248	trimethobenzamide - PC3	0.511	2	0.8	0.0805	0.0938	100
249	hydrochlorothiazide - MCF7	0.588	2	0.8	0.08068	0.1049	100
250	triflusal - MCF7	-0.651	2	-0.796	0.08078	0.116	100
251	convolamine - MCF7	0.634	2	0.798	0.08167	0.0886	100
252	myosmine - MCF7	0.427	3	0.654	0.08325	0.2	66
253	etomidate - MCF7	-0.643	2	-0.793	0.08338	0.0856	100
254	fursultiamine - MCF7	0.572	2	0.795	0.08408	0.0784	100
255	dantrolene - MCF7	0.38	3	0.653	0.08461	0.076	66
256	sulfadimethoxine - PC3	0.528	2	0.795	0.08466	0.0756	100
257	calmidazolium - MCF7	-0.595	2	-0.792	0.0847	0.1967	100
258	clemizole - MCF7	-0.599	2	-0.791	0.08495	0.1035	100
259	sulfamerazine - MCF7	-0.676	3	-0.65	0.08551	0.1347	100
260	aceclofenac - MCF7	0.559	2	0.793	0.08565	0.1149	100
261	ticlopidine - PC3	-0.592	2	-0.79	0.08583	0.1016	100
262	fluphenazine - MCF7	-0.418	10	-0.378	0.08583	0.2427	80
263	diclofenamide - MCF7	0.617	2	0.793	0.08589	0.1069	100
264	cephaeline - MCF7	-0.525	3	-0.649	0.08639	0.5681	100
265	terazosin - MCF7	0.539	2	0.792	0.0867	0.1491	100
266	benzthiazide - MCF7	-0.596	2	-0.789	0.08722	0.1702	100
267	sulfadimidine - PC3	0.527	2	0.791	0.0875	0.1	100
268	vancomycin - MCF7	0.419	2	0.788	0.09066	0.0753	100
269	protoveratrine A - MCF7	-0.666	2	-0.784	0.09138	0.2366	100
270	bisacodyl - MCF7	-0.615	2	-0.784	0.09205	0.2917	100
271	gentamicin - MCF7	0.514	2	0.786	0.09207	0.1553	100
272	methotrexate - HL60	-0.604	2	-0.782	0.09293	0.2263	100
273	minaprine - PC3	-0.587	2	-0.782	0.09326	0.1018	100
274	cisapride - MCF7	-0.607	2	-0.782	0.09372	0.0559	100
275	abamectin - MCF7	-0.596	2	-0.781	0.09386	0.1643	100
276	etiocholanolone - MCF7	0.399	3	0.642	0.09398	0.205	66
277	etynodiol - MCF7	0.595	2	0.784	0.09402	0.1038	100
278	alprostadil - MCF7	0.538	3	0.641	0.09486	0.2971	66
279	homosalate - MCF7	0.449	2	0.783	0.09495	0.0864	100
280	mefloquine - PC3	-0.631	2	-0.78	0.09495	0.2328	100
281	hesperetin - MCF7	-0.626	2	-0.78	0.09527	0.0925	100
282	spiradoline - MCF7	0.54	2	0.782	0.09561	0.1012	100
283	irinotecan - MCF7	-0.651	2	-0.779	0.09573	0.2316	100
284	josamycin - PC3	0.51	2	0.782	0.09575	0.1069	100
285	tranexamic acid - PC3	0.5	2	0.781	0.09621	0.1192	100
286	Prestwick-685 - MCF7	-0.588	2	-0.779	0.09629	0.1078	100
287	biperiden - MCF7	0.453	3	0.639	0.09665	0.3176	66
288	hexamethonium bromide - MCF7	-0.614	2	-0.778	0.09728	0.118	100
289	ondansetron - MCF7	0.391	2	0.779	0.09794	0.1395	100
290	riluzole - PC3	0.529	2	0.779	0.09827	0.1448	100
291	carmustine - MCF7	0.449	2	0.779	0.09845	0.1506	100
292	ornidazole - PC3	-0.646	2	-0.776	0.09895	0.177	100
293	beta-escin - MCF7	-0.57	3	-0.635	0.09917	0.1189	100
294	sulfachlorpyridazine - MCF7	-0.624	2	-0.775	0.09961	0.0938	100
295	levonorgestrel - PC3	-0.627	2	-0.775	0.09986	0.1154	100
296	felbinac - MCF7	0.521	2	0.777	0.09998	0.1317	100
297	pivampicillin - MCF7	0.504	2	0.777	0.10028	0.1304	100
298	parthenolide - MCF7	-0.623	2	-0.773	0.10163	0.2349	100
299	ellipticine - MCF7	-0.584	2	-0.773	0.10191	0.306	100
300	atractyloside - MCF7	0.403	2	0.775	0.10199	0.1297	50
301	Prestwick-1082 - MCF7	0.313	2	0.775	0.10209	0.1749	50
302	meclofenamic acid - PC3	0.279	2	0.774	0.10326	0.1514	50
303	levomepromazine - MCF7	0.262	2	0.773	0.10364	0.21	50
304	SB-203580 - MCF7	0.397	3	0.631	0.10386	0.2701	66
305	ethaverine - MCF7	-0.617	2	-0.77	0.10468	0.1467	100
306	phenylpropanolamine - MCF7	-0.631	2	-0.769	0.10505	0.0764	100
307	neostigmine bromide - MCF7	0.32	2	0.771	0.10593	0.2784	50
308	6-bromoindirubin-3'-oxime - PC3	-0.471	4	-0.559	0.10603	0.3731	100
309	ketorolac - MCF7	0.272	2	0.769	0.10808	0.1799	50
310	podophyllotoxin - MCF7	0.371	2	0.767	0.10951	0.2042	50
311	sertaconazole - MCF7	-0.578	2	-0.763	0.10989	0.1654	100
312	memantine - MCF7	0.339	2	0.766	0.111	0.1875	50
313	minoxidil - MCF7	0.247	2	0.765	0.1111	0.1711	50
314	trazodone - MCF7	-0.666	2	-0.762	0.11132	0.2402	100
315	tetracycline - PC3	0.232	2	0.765	0.11183	0.1438	50
316	sulfadimethoxine - MCF7	0.324	2	0.764	0.11225	0.2412	50
317	melatonin - MCF7	0.275	2	0.764	0.11233	0.1726	50
318	pancuronium bromide - MCF7	-0.589	2	-0.761	0.11245	0.173	100
319	loperamide - MCF7	-0.565	3	-0.623	0.11255	0.2348	100
320	tetracycline - MCF7	0.303	2	0.764	0.11285	0.1497	50
321	fluocinonide - MCF7	-0.66	3	-0.622	0.11377	0.2131	100
322	propylthiouracil - MCF7	-0.687	2	-0.759	0.1148	0.1675	100
323	BCB000038 - MCF7	-0.573	2	-0.758	0.11492	0.129	100
324	eucatropine - MCF7	-0.565	3	-0.62	0.11602	0.268	100
325	ajmaline - MCF7	0.314	2	0.76	0.11627	0.2706	50
326	promazine - PC3	-0.57	2	-0.756	0.11752	0.1897	100
327	PHA-00767505E - PC3	0.261	2	0.757	0.11847	0.1657	50
328	merbromin - PC3	0.231	2	0.757	0.11863	0.1474	50
329	cefalexin - MCF7	-0.536	3	-0.617	0.1188	0.3158	100
330	gliclazide - MCF7	-0.612	2	-0.755	0.11897	0.1579	100
331	florfenicol - MCF7	-0.631	2	-0.754	0.11923	0.2159	100
332	sulfaphenazole - MCF7	0.234	2	0.756	0.11939	0.1724	50
333	fenbufen - PC3	-0.611	2	-0.754	0.11943	0.2022	100
334	acetazolamide - MCF7	-0.671	2	-0.754	0.11957	0.2102	100
335	streptomycin - MCF7	0.378	2	0.755	0.1207	0.2767	50
336	terconazole - MCF7	-0.651	2	-0.753	0.12094	0.1118	100
337	ceforanide - MCF7	0.327	2	0.753	0.12189	0.2983	50
338	6-benzylaminopurine - MCF7	-0.519	3	-0.615	0.12201	0.0958	66
339	sulindac - PC3	0.371	2	0.751	0.12372	0.2957	50
340	meclofenoxate - PC3	-0.621	2	-0.748	0.12547	0.1498	100
341	ginkgolide A - MCF7	-0.602	2	-0.747	0.12609	0.2609	100
342	coralyne - MCF7	0.283	2	0.745	0.12869	0.1892	50
343	saquinavir - MCF7	-0.582	2	-0.744	0.12983	0.2921	100
344	adipiodone - MCF7	-0.574	2	-0.743	0.131	0.2011	100
345	tocainide - MCF7	0.315	2	0.743	0.13116	0.1887	50
346	metampicillin - MCF7	0.306	2	0.743	0.13148	0.2416	50
347	clomipramine - MCF7	-0.62	2	-0.741	0.13245	0.2479	100
348	vinpocetine - MCF7	-0.609	2	-0.741	0.13299	0.1466	100
349	skimmianine - MCF7	-0.585	2	-0.74	0.13335	0.1742	100
350	guaifenesin - MCF7	0.379	3	0.606	0.13372	0.1806	66
351	metolazone - MCF7	0.272	2	0.741	0.1338	0.1686	50
352	amprolium - MCF7	-0.602	2	-0.74	0.13412	0.2326	100
353	Prestwick-1085 - MCF7	-0.598	2	-0.739	0.13488	0.1387	100
354	chenodeoxycholic acid - MCF7	0.339	2	0.74	0.135	0.1529	50
355	metoprolol - MCF7	0.311	2	0.739	0.13506	0.2833	50
356	neomycin - MCF7	-0.662	2	-0.738	0.13623	0.1154	100
357	zardaverine - MCF7	0.368	2	0.737	0.13734	0.1769	50
358	chloroquine - MCF7	0.204	2	0.737	0.1378	0.0993	50
359	ampyrone - MCF7	0.31	2	0.736	0.13861	0.1688	50
360	metamizole sodium - PC3	-0.584	2	-0.735	0.13893	0.2694	100
361	metyrapone - MCF7	-0.673	2	-0.735	0.13915	0.1449	100
362	Prestwick-857 - MCF7	0.35	2	0.735	0.13923	0.1667	50
363	Prestwick-1084 - MCF7	-0.576	2	-0.735	0.13957	0.2723	100
364	methapyrilene - MCF7	-0.612	2	-0.734	0.13987	0.2086	100
365	pilocarpine - MCF7	0.316	2	0.734	0.14072	0.25	50
366	captopril - PC3	-0.564	2	-0.733	0.14142	0.1731	100
367	cloperastine - MCF7	-0.629	3	-0.6	0.14154	0.2059	100
368	H-7 - MCF7	-0.556	2	-0.732	0.14263	0.3939	100
369	mepyramine - MCF7	-0.592	2	-0.731	0.14348	0.1771	100
370	sulfaquinoxaline - MCF7	0.269	2	0.731	0.14362	0.2262	50
371	prenylamine - MCF7	-0.682	2	-0.731	0.14408	0.3019	100
372	5224221 - MCF7	-0.553	2	-0.73	0.14448	0.3233	100
373	clebopride - MCF7	0.256	2	0.73	0.145	0.1714	50
374	methylergometrine - MCF7	-0.639	2	-0.73	0.14533	0.1492	100
375	dantrolene - PC3	0.274	2	0.729	0.14567	0.2108	50
376	androsterone - MCF7	-0.558	2	-0.729	0.14583	0.1839	100
377	clorsulon - MCF7	0.421	2	0.728	0.14748	0.2593	50
378	cefamandole - MCF7	0.321	2	0.728	0.1478	0.224	50
379	repaglinide - MCF7	-0.586	2	-0.727	0.14824	0.1888	100
380	5194442 - PC3	-0.624	2	-0.727	0.14836	0.2327	100
381	5279552 - MCF7	-0.591	2	-0.726	0.14889	0.1607	100
382	chloropyrazine - MCF7	0.363	2	0.726	0.14993	0.2109	50
383	ampicillin - MCF7	0.281	2	0.724	0.15265	0.1854	50
384	heptaminol - PC3	0.394	2	0.723	0.15313	0.2356	50
385	iproniazid - MCF7	0.178	2	0.723	0.15321	0.2256	50
386	halcinonide - MCF7	-0.708	2	-0.722	0.1542	0.1092	100
387	clozapine - HL60	0.291	4	0.519	0.15439	0.3729	50
388	sulfadimidine - MCF7	-0.56	3	-0.59	0.15468	0.1488	100
389	monorden - HL60	0.079	4	0.518	0.15542	0.257	50
390	cinchocaine - MCF7	-0.543	2	-0.72	0.15561	0.1429	100
391	F0447-0125 - MCF7	-0.592	2	-0.72	0.15587	0.2562	100
392	ricinine - MCF7	-0.605	2	-0.719	0.15692	0.1958	100
393	isoniazid - PC3	0.382	2	0.719	0.15718	0.3766	50
394	doxycycline - MCF7	0.298	3	0.59	0.15734	0.2333	66
395	captopril - MCF7	0.341	2	0.718	0.1577	0.2745	50
396	raloxifene - HL60	0.262	2	0.718	0.15808	0.1391	50
397	carbimazole - MCF7	0.384	2	0.717	0.15935	0.2614	50
398	mimosine - MCF7	0.319	2	0.716	0.16034	0.1333	50
399	bumetanide - MCF7	0.373	2	0.715	0.16158	0.3687	50
400	PHA-00851261E - MCF7	0.254	4	0.513	0.16243	0.2579	50
401	tetraethylenepentamine - MCF7	0.206	3	0.586	0.16273	0.1313	66
402	propafenone - MCF7	-0.555	2	-0.714	0.16368	0.1487	100
403	terfenadine - MCF7	-0.662	2	-0.713	0.16398	0.339	100
404	dacarbazine - MCF7	-0.578	2	-0.713	0.16468	0.3858	100
405	0179445-0000 - PC3	-0.346	4	-0.513	0.16567	0.1849	75
406	cinchonidine - MCF7	0.295	2	0.711	0.16665	0.1585	50
407	15(S)-15-methylprostaglandin E2 - MCF7	-0.549	2	-0.71	0.16768	0.1448	100
408	chlorpromazine - PC3	-0.424	4	-0.512	0.16774	0.2773	75
409	hexestrol - MCF7	-0.584	2	-0.71	0.16794	0.2239	100
410	fenoprofen - PC3	-0.643	2	-0.71	0.16822	0.3061	100
411	brinzolamide - MCF7	0.393	2	0.71	0.16826	0.1132	50
412	tyloxapol - MCF7	-0.637	2	-0.71	0.1684	0.2644	100
413	cycloserine - MCF7	-0.556	2	-0.709	0.16897	0.3296	100
414	meclofenoxate - MCF7	-0.538	3	-0.581	0.16976	0.2514	100
415	estropipate - MCF7	0.472	2	0.707	0.1711	0.2941	50
416	cyproterone - MCF7	-0.542	2	-0.707	0.1715	0.3096	100
417	meglumine - MCF7	0.345	2	0.706	0.17275	0.2112	50
418	meropenem - MCF7	-0.553	2	-0.706	0.17297	0.2093	100
419	niflumic acid - MCF7	0.189	2	0.705	0.17331	0.1081	50
420	gossypol - MCF7	-0.585	3	-0.578	0.17334	0.3192	100
421	clindamycin - MCF7	0.245	2	0.703	0.17571	0.2893	50
422	bacitracin - MCF7	0.279	2	0.703	0.17659	0.1532	50
423	beta-escin - PC3	-0.58	2	-0.702	0.17784	0.2243	100
424	salbutamol - PC3	-0.537	2	-0.701	0.17871	0.2553	100
425	Prestwick-860 - MCF7	-0.551	2	-0.701	0.17927	0.2541	100
426	piperidolate - MCF7	-0.588	2	-0.7	0.17969	0.3204	100
427	ethambutol - MCF7	-0.533	2	-0.7	0.17989	0.2391	100
428	raubasine - MCF7	0.337	2	0.699	0.18035	0.2037	50
429	SB-203580 - PC3	-0.539	2	-0.699	0.18104	0.2165	100
430	azathioprine - PC3	0.303	2	0.698	0.18192	0.2389	50
431	trimetazidine - MCF7	-0.567	2	-0.698	0.182	0.3476	100
432	oxolinic acid - MCF7	-0.559	2	-0.696	0.18414	0.234	100
433	dimenhydrinate - MCF7	0.357	2	0.696	0.18464	0.323	50
434	promethazine - MCF7	-0.652	2	-0.695	0.18506	0.3403	100
435	levocabastine - MCF7	-0.587	2	-0.694	0.18681	0.2514	100
436	pralidoxime - MCF7	0.288	2	0.694	0.18736	0.1778	50
437	hydroflumethiazide - MCF7	-0.549	2	-0.693	0.18782	0.3224	100
438	oxetacaine - MCF7	-0.6	2	-0.693	0.18798	0.229	100
439	clofilium tosylate - MCF7	-0.524	2	-0.693	0.18844	0.2368	100
440	ethisterone - PC3	0.185	2	0.692	0.18947	0.2384	50
441	eucatropine - PC3	-0.522	2	-0.692	0.18957	0.3526	100
442	mitoxantrone - MCF7	-0.544	2	-0.691	0.19094	0.3154	100
443	oxybutynin - MCF7	-0.629	2	-0.69	0.19172	0.2192	100
444	dicloxacillin - MCF7	0.427	2	0.689	0.19297	0.3906	50
445	paromomycin - MCF7	-0.553	2	-0.688	0.19462	0.1837	100
446	pentamidine - MCF7	-0.515	3	-0.566	0.19536	0.2143	100
447	enoxacin - MCF7	-0.621	2	-0.687	0.19542	0.2151	100
448	econazole - MCF7	-0.537	2	-0.686	0.19689	0.2727	100
449	dihydroergocristine - MCF7	0.329	2	0.685	0.19848	0.3867	50
450	noretynodrel - MCF7	-0.553	2	-0.684	0.19903	0.2945	100
451	valinomycin - MCF7	-0.522	2	-0.684	0.19911	0.3071	100
452	furazolidone - MCF7	0.338	2	0.684	0.19979	0.3034	50
453	azacitidine - MCF7	-0.563	2	-0.683	0.20035	0.3636	100
454	cefmetazole - MCF7	-0.519	2	-0.683	0.2006	0.1765	100
455	withaferin A - PC3	-0.594	2	-0.683	0.20074	0.3583	100
456	famprofazone - PC3	-0.583	2	-0.683	0.20082	0.3427	100
457	karakoline - MCF7	0.212	3	0.563	0.20151	0.061	66
458	levonorgestrel - MCF7	-0.494	3	-0.562	0.20325	0.3226	100
459	iloprost - MCF7	0.41	2	0.68	0.20394	0.3245	50
460	scoulerine - MCF7	0.252	2	0.68	0.2046	0.2717	50
461	thioridazine - MCF7	-0.348	11	-0.307	0.20463	0.5464	63
462	F0447-0125 - PC3	0.364	2	0.679	0.2049	0.3539	50
463	fenspiride - PC3	-0.529	2	-0.679	0.20575	0.2258	100
464	prilocaine - MCF7	-0.451	3	-0.56	0.20587	0.1486	66
465	dihydrostreptomycin - PC3	0.333	2	0.678	0.20641	0.2603	50
466	GW-8510 - PC3	-0.515	2	-0.677	0.20911	0.5684	100
467	josamycin - MCF7	0.239	2	0.676	0.20939	0.3161	50
468	metformin - PC3	0.327	2	0.675	0.21058	0.3214	50
469	metergoline - MCF7	-0.619	2	-0.675	0.21104	0.2713	100
470	pyrantel - MCF7	0.352	2	0.675	0.2112	0.2014	50
471	tolazoline - MCF7	0.398	2	0.674	0.21142	0.1739	50
472	clemastine - MCF7	0.391	2	0.674	0.21222	0.355	50
473	xylazine - MCF7	-0.612	2	-0.674	0.21301	0.3281	100
474	cotinine - MCF7	-0.451	3	-0.556	0.21348	0.1979	66
475	fenbufen - MCF7	-0.448	3	-0.555	0.21483	0.116	66
476	pyrazinamide - MCF7	-0.513	2	-0.673	0.21494	0.306	100
477	deptropine - MCF7	-0.653	2	-0.672	0.21538	0.2171	100
478	CP-319743 - MCF7	-0.567	2	-0.672	0.21563	0.2121	100
479	miconazole - MCF7	-0.664	2	-0.672	0.21591	0.25	100
480	tropicamide - MCF7	-0.45	3	-0.554	0.21621	0.239	66
481	chlorzoxazone - MCF7	-0.566	2	-0.671	0.21717	0.4162	100
482	eldeline - PC3	-0.523	2	-0.67	0.21838	0.3958	100
483	rescinnamine - MCF7	-0.604	2	-0.669	0.21921	0.4015	100
484	ampyrone - PC3	0.227	2	0.668	0.22001	0.2529	50
485	MK-886 - MCF7	0.273	2	0.668	0.22047	0.1926	50
486	famotidine - MCF7	0.212	2	0.667	0.22072	0.1181	50
487	pramocaine - MCF7	-0.566	3	-0.551	0.2218	0.2601	100
488	decamethonium bromide - MCF7	0.368	2	0.666	0.22259	0.2486	50
489	clozapine - PC3	-0.547	3	-0.55	0.22436	0.2873	100
490	lomefloxacin - MCF7	-0.293	3	-0.55	0.22448	0.1667	66
491	citalopram - PC3	0.232	2	0.665	0.22452	0.2485	50
492	ritodrine - MCF7	-0.535	2	-0.665	0.22536	0.3817	100
493	sulpiride - PC3	-0.64	2	-0.665	0.22558	0.3532	100
494	clobetasol - MCF7	-0.615	2	-0.664	0.22583	0.1606	100
495	Prestwick-664 - MCF7	-0.44	3	-0.549	0.22594	0.3916	66
496	mianserin - PC3	-0.533	2	-0.664	0.22605	0.2479	100
497	diltiazem - MCF7	-0.541	2	-0.664	0.22691	0.3314	100
498	methylbenzethonium chloride - MCF7	-0.593	3	-0.548	0.22773	0.3036	100
499	mephentermine - PC3	-0.522	2	-0.662	0.22949	0.2632	100
500	nimodipine - MCF7	0.333	2	0.661	0.22969	0.2484	50
501	dioxybenzone - MCF7	-0.5	2	-0.661	0.23096	0.2081	100
502	triamcinolone - MCF7	0.259	2	0.66	0.2313	0.1887	50
503	perphenazine - PC3	-0.531	2	-0.66	0.23158	0.3056	100
504	testosterone - MCF7	-0.527	3	-0.545	0.23311	0.3355	100
505	nipecotic acid - MCF7	-0.543	2	-0.657	0.23579	0.2471	100
506	pentolonium - PC3	-0.588	2	-0.657	0.23627	0.3434	100
507	Prestwick-864 - MCF7	-0.536	2	-0.656	0.23677	0.4649	100
508	etiocholanolone - PC3	0.277	2	0.656	0.23723	0.4036	50
509	metrizamide - MCF7	0.346	2	0.656	0.2375	0.325	50
510	lanatoside C - MCF7	-0.459	3	-0.543	0.23846	0.3763	100
511	oxamniquine - MCF7	0.376	2	0.655	0.23874	0.255	50
512	omeprazole - MCF7	-0.569	2	-0.655	0.23898	0.3915	100
513	dilazep - MCF7	-0.558	2	-0.653	0.24073	0.2847	100
514	difenidol - MCF7	-0.615	2	-0.653	0.24138	0.4309	100
515	11-deoxy-16,16-dimethylprostaglandin E2 - MCF7	-0.547	2	-0.653	0.2421	0.2188	100
516	CP-690334-01 - PC3	0.218	4	0.468	0.24252	0.5402	50
517	alvespimycin - PC3	-0.604	2	-0.651	0.24416	0.3046	100
518	acetylsalicylic acid - MCF7	-0.433	8	-0.342	0.24456	0.5284	75
519	carbachol - MCF7	-0.585	2	-0.65	0.24576	0.4477	100
520	tubocurarine chloride - MCF7	0.285	2	0.649	0.24653	0.2329	50
521	butamben - MCF7	0.389	2	0.649	0.24673	0.3118	50
522	salsolidin - MCF7	-0.571	2	-0.648	0.24816	0.3882	100
523	paclitaxel - PC3	0.293	2	0.648	0.2487	0.0968	50
524	suxibuzone - MCF7	-0.579	2	-0.648	0.24872	0.2179	100
525	fludrocortisone - PC3	0.3	2	0.646	0.25063	0.2667	50
526	etilefrine - MCF7	0.395	2	0.645	0.25263	0.3269	50
527	metacycline - MCF7	-0.508	2	-0.645	0.25281	0.4153	100
528	rifampicin - MCF7	0.279	2	0.644	0.25438	0.2076	50
529	probenecid - MCF7	-0.635	2	-0.644	0.25458	0.2387	100
530	benzonatate - MCF7	-0.493	2	-0.643	0.25617	0.1783	100
531	clopamide - MCF7	0.31	2	0.642	0.25717	0.2534	50
532	mefloquine - MCF7	-0.639	2	-0.642	0.25796	0.3226	100
533	yohimbine - MCF7	0.418	3	0.533	0.25949	0.2443	66
534	Gly-His-Lys - PC3	0.354	2	0.64	0.25969	0.4629	50
535	oxolinic acid - PC3	0.263	2	0.639	0.26025	0.2993	50
536	Prestwick-665 - PC3	-0.51	2	-0.64	0.26039	0.4136	100
537	myosmine - PC3	0.374	2	0.639	0.26104	0.2158	50
538	edrophonium chloride - PC3	-0.482	2	-0.64	0.26126	0.3316	100
539	colecalciferol - MCF7	-0.481	2	-0.639	0.26154	0.3	100
540	tetroquinone - MCF7	-0.588	2	-0.639	0.26234	0.3989	100
541	dicoumarol - MCF7	0.195	3	0.531	0.26242	0.1987	66
542	riboflavin - MCF7	-0.653	2	-0.639	0.26265	0.4111	100
543	chlorphenesin - MCF7	-0.491	2	-0.637	0.26452	0.2486	100
544	levcycloserine - PC3	-0.541	2	-0.637	0.26488	0.4	100
545	maprotiline - MCF7	0.255	2	0.635	0.26667	0.6186	50
546	iopromide - MCF7	0.285	2	0.634	0.26721	0.3924	50
547	bufexamac - MCF7	-0.533	2	-0.635	0.26741	0.3951	100
548	famprofazone - MCF7	-0.53	3	-0.528	0.26923	0.2625	100
549	Y-27632 - MCF7	-0.513	2	-0.634	0.26928	0.47	100
550	mepenzolate bromide - MCF7	-0.589	2	-0.633	0.27132	0.2832	100
551	oxymetazoline - PC3	-0.597	2	-0.632	0.2721	0.3218	100
552	arcaine - MCF7	0.306	2	0.631	0.27295	0.4438	50
553	aztreonam - PC3	0.295	2	0.63	0.27323	0.2078	50
554	karakoline - PC3	0.302	2	0.63	0.27444	0.3314	50
555	gramine - MCF7	-0.534	2	-0.63	0.27512	0.4432	100
556	cyclizine - MCF7	-0.486	2	-0.63	0.27538	0.3333	100
557	sulfabenzamide - MCF7	-0.549	2	-0.629	0.27669	0.3722	100
558	semustine - MCF7	-0.494	2	-0.629	0.27715	0.3037	100
559	SC-560 - MCF7	0.311	2	0.628	0.27745	0.4046	50
560	furaltadone - PC3	-0.49	2	-0.628	0.27798	0.3933	100
561	naftidrofuryl - MCF7	0.406	2	0.627	0.27842	0.3272	50
562	prochlorperazine - HL60	-0.284	4	-0.455	0.27884	0.3514	75
563	nicergoline - PC3	-0.481	2	-0.627	0.27985	0.2059	100
564	epitiostanol - MCF7	0.305	2	0.626	0.28049	0.4808	50
565	tinidazole - MCF7	0.246	3	0.523	0.28091	0.3032	66
566	etamsylate - MCF7	-0.467	2	-0.626	0.28099	0.2888	100
567	procaine - MCF7	-0.497	2	-0.626	0.2814	0.3921	100
568	C-75 - MCF7	-0.541	2	-0.625	0.28226	0.3154	100
569	hydralazine - PC3	-0.51	2	-0.624	0.28401	0.2881	100
570	phentolamine - MCF7	0.246	4	0.45	0.28431	0.3719	50
571	lidocaine - PC3	0.253	2	0.623	0.28437	0.2733	50
572	dilazep - PC3	-0.542	2	-0.624	0.2846	0.4575	100
573	ticlopidine - MCF7	-0.486	2	-0.624	0.28486	0.2177	100
574	mefenamic acid - MCF7	-0.573	2	-0.624	0.28518	0.2471	100
575	mesalazine - MCF7	0.244	3	0.521	0.28597	0.1948	66
576	flunixin - PC3	-0.588	2	-0.623	0.28695	0.3646	100
577	sulfamethoxypyridazine - MCF7	-0.457	3	-0.519	0.2873	0.3827	66
578	cefapirin - MCF7	0.244	2	0.622	0.28745	0.344	50
579	estriol - MCF7	-0.501	2	-0.622	0.28834	0.3354	100
580	troglitazone - PC3	-0.456	4	-0.45	0.28936	0.6098	75
581	iproniazid - PC3	0.397	2	0.62	0.28949	0.4432	50
582	theophylline - MCF7	-0.551	2	-0.621	0.28955	0.3781	100
583	levobunolol - MCF7	0.37	2	0.62	0.28995	0.3396	50
584	bicuculline - MCF7	-0.542	2	-0.621	0.28997	0.4821	100
585	flunarizine - MCF7	-0.581	2	-0.621	0.29015	0.3946	100
586	lobelanidine - MCF7	0.28	2	0.619	0.29198	0.1931	50
587	lomefloxacin - PC3	-0.625	2	-0.619	0.2924	0.4365	100
588	mifepristone - MCF7	-0.574	2	-0.619	0.29287	0.3312	100
589	valdecoxib - PC3	0.201	2	0.618	0.29335	0.2552	50
590	thioproperazine - MCF7	-0.466	2	-0.618	0.29347	0.298	100
591	nordihydroguaiaretic acid - ssMCF7	0.396	2	0.617	0.29425	0.2222	50
592	zomepirac - MCF7	-0.599	2	-0.618	0.29482	0.3687	100
593	PF-00539758-00 - PC3	0.398	2	0.617	0.29506	0.3717	50
594	selegiline - MCF7	-0.633	2	-0.617	0.29508	0.4044	100
595	gibberellic acid - MCF7	0.335	2	0.616	0.29604	0.4305	50
596	iodixanol - MCF7	0.416	2	0.616	0.29633	0.1333	50
597	trimethoprim - MCF7	-0.649	2	-0.617	0.29639	0.3272	100
598	dequalinium chloride - MCF7	-0.539	2	-0.616	0.29661	0.3282	100
599	remoxipride - MCF7	-0.522	2	-0.616	0.29683	0.4195	100
600	procarbazine - MCF7	-0.477	2	-0.616	0.29745	0.2209	100
601	nalbuphine - MCF7	-0.479	2	-0.615	0.29832	0.3743	100
602	PNU-0251126 - PC3	-0.429	4	-0.447	0.29849	0.5	75
603	hydrocotarnine - MCF7	-0.515	2	-0.615	0.29878	0.5471	100
604	ketoprofen - MCF7	-0.424	3	-0.513	0.29956	0.1879	66
605	ethoxyquin - MCF7	-0.547	2	-0.614	0.30041	0.2046	100
606	canrenoic acid - PC3	-0.523	2	-0.614	0.30069	0.4237	100
607	mepenzolate bromide - PC3	-0.479	2	-0.613	0.30254	0.3237	100
608	BCB000040 - PC3	0.323	2	0.612	0.30278	0.2901	50
609	citalopram - MCF7	0.279	2	0.612	0.30297	0.1613	50
610	pentetrazol - MCF7	0.211	2	0.611	0.30365	0.2741	50
611	neomycin - PC3	-0.473	2	-0.612	0.30385	0.415	100
612	alfaxalone - MCF7	-0.516	2	-0.611	0.3048	0.289	100
613	PF-01378883-00 - PC3	-0.511	2	-0.609	0.30775	0.2544	100
614	cefamandole - PC3	0.325	2	0.609	0.30781	0.4696	50
615	3-nitropropionic acid - PC3	-0.509	2	-0.609	0.3083	0.4011	100
616	budesonide - MCF7	-0.541	2	-0.608	0.30916	0.483	100
617	heliotrine - MCF7	-0.437	3	-0.509	0.30983	0.4536	66
618	carbamazepine - MCF7	-0.492	5	-0.398	0.31285	0.5157	80
619	oxantel - MCF7	0.228	2	0.605	0.31286	0.1761	50
620	flutamide - MCF7	0.187	2	0.605	0.31355	0.3091	50
621	monocrotaline - MCF7	-0.57	2	-0.606	0.31367	0.4731	100
622	pergolide - MCF7	0.308	2	0.604	0.31417	0.4161	50
623	calcium folinate - PC3	0.185	2	0.603	0.31602	0.4444	50
624	cefazolin - PC3	-0.554	2	-0.604	0.31626	0.4011	100
625	alvespimycin - HL60	0.349	3	0.506	0.31724	0.3779	66
626	mebendazole - MCF7	-0.492	2	-0.603	0.31757	0.5118	100
627	thioridazine - HL60	-0.497	4	-0.439	0.31831	0.5133	75
628	niclosamide - PC3	-0.516	2	-0.603	0.31848	0.3636	100
629	desipramine - MCF7	-0.482	2	-0.602	0.31904	0.3459	100
630	nalidixic acid - PC3	-0.467	2	-0.602	0.31952	0.4951	100
631	methylprednisolone - MCF7	-0.48	2	-0.602	0.31989	0.2771	100
632	butoconazole - MCF7	-0.63	2	-0.602	0.32039	0.3106	100
633	loracarbef - MCF7	0.311	2	0.6	0.3218	0.3245	50
634	bromocriptine - MCF7	-0.506	2	-0.6	0.3223	0.4328	100
635	aconitine - MCF7	0.273	2	0.599	0.32282	0.152	50
636	acetylsalicylic acid - PC3	-0.616	2	-0.6	0.32311	0.337	100
637	alprostadil - PC3	0.195	3	0.503	0.32427	0.5497	66
638	harmalol - MCF7	0.282	2	0.598	0.3247	0.2555	50
639	thiamphenicol - MCF7	0.321	2	0.596	0.32749	0.4929	50
640	merbromin - MCF7	0.324	2	0.596	0.32777	0.5106	50
641	valproic acid - PC3	-0.275	10	-0.284	0.32826	0.468	70
642	amprolium - PC3	0.268	2	0.595	0.32884	0.5455	50
643	lasalocid - MCF7	0.339	2	0.595	0.32912	0.6553	50
644	trapidil - MCF7	0.261	2	0.594	0.33107	0.35	50
645	dihydroergotamine - PC3	0.261	2	0.593	0.33222	0.1863	50
646	ouabain - MCF7	-0.431	2	-0.594	0.3324	0.4632	100
647	oxetacaine - PC3	-0.471	2	-0.594	0.33262	0.3243	100
648	miconazole - PC3	-0.635	2	-0.593	0.33284	0.2836	100
649	cefsulodin - MCF7	-0.499	2	-0.593	0.33353	0.4571	100
650	verteporfin - MCF7	-0.445	2	-0.592	0.33488	0.5665	100
651	paroxetine - MCF7	0.257	2	0.591	0.33522	0.1974	50
652	amylocaine - PC3	-0.506	2	-0.592	0.33562	0.4759	100
653	cefalotin - MCF7	-0.529	2	-0.59	0.33898	0.3695	100
654	idazoxan - MCF7	-0.526	2	-0.59	0.33926	0.4358	100
655	etofenamate - MCF7	-0.574	2	-0.589	0.33987	0.2317	100
656	bupropion - MCF7	-0.506	2	-0.589	0.34011	0.2905	100
657	(-)-isoprenaline - MCF7	-0.465	2	-0.589	0.34049	0.3095	100
658	5230742 - MCF7	-0.574	2	-0.588	0.34188	0.459	100
659	natamycin - MCF7	-0.636	2	-0.588	0.3422	0.5	100
660	xylometazoline - MCF7	-0.424	2	-0.587	0.34256	0.2971	100
661	withaferin A - MCF7	-0.485	2	-0.587	0.3429	0.4797	100
662	racecadotril - MCF7	0.372	2	0.586	0.34379	0.4231	50
663	mecamylamine - MCF7	-0.459	2	-0.586	0.34486	0.4186	100
664	minoxidil - PC3	-0.561	2	-0.585	0.34687	0.5086	100
665	meticrane - MCF7	-0.448	2	-0.585	0.34739	0.4691	100
666	tetrahydroalstonine - MCF7	0.287	2	0.582	0.34968	0.2183	50
667	levcycloserine - MCF7	-0.441	2	-0.583	0.35019	0.3554	100
668	doxazosin - MCF7	-0.549	2	-0.583	0.35039	0.5135	100
669	metaraminol - PC3	-0.537	2	-0.582	0.35095	0.5722	100
670	doxorubicin - MCF7	-0.531	2	-0.581	0.3528	0.6121	100
671	diprophylline - MCF7	0.283	2	0.58	0.35409	0.4444	50
672	pipenzolate bromide - MCF7	-0.584	2	-0.58	0.35481	0.4479	100
673	trifluoperazine - HL60	-0.351	4	-0.426	0.35509	0.4766	50
674	thioproperazine - PC3	-0.495	2	-0.579	0.35624	0.2733	100
675	Chicago Sky Blue 6B - MCF7	0.274	2	0.578	0.35644	0.432	50
676	nitrofurantoin - MCF7	-0.619	2	-0.577	0.36005	0.2761	100
677	fludroxycortide - PC3	-0.518	2	-0.577	0.36023	0.5227	100
678	MG-262 - PC3	-0.473	2	-0.577	0.36053	0.7049	100
679	griseofulvin - PC3	-0.581	2	-0.576	0.36157	0.3129	100
680	hydroxyzine - PC3	0.331	2	0.574	0.36324	0.4497	50
681	ethotoin - PC3	-0.447	2	-0.575	0.36377	0.5028	100
682	benzylpenicillin - MCF7	-0.526	2	-0.575	0.36405	0.4663	100
683	flunisolide - PC3	-0.433	2	-0.574	0.36427	0.5244	100
684	lidocaine - MCF7	0.316	2	0.573	0.36483	0.5569	50
685	fosfosal - MCF7	0.276	2	0.573	0.36564	0.4023	50
686	fluocinonide - PC3	-0.525	2	-0.574	0.36566	0.4911	100
687	niclosamide - MCF7	-0.414	2	-0.573	0.36663	0.5575	100
688	nocodazole - PC3	0.288	2	0.571	0.3688	0.4205	50
689	ifenprodil - MCF7	-0.5	2	-0.572	0.36904	0.5455	100
690	CP-319743 - PC3	0.317	2	0.57	0.36976	0.5714	50
691	fluphenazine - HL60	-0.325	4	-0.421	0.37001	0.5357	50
692	griseofulvin - MCF7	-0.475	2	-0.571	0.37023	0.36	100
693	guanabenz - PC3	0.428	2	0.57	0.37063	0.6724	50
694	nifuroxazide - MCF7	-0.452	2	-0.571	0.37071	0.45	100
695	butirosin - MCF7	-0.433	2	-0.57	0.37153	0.2517	100
696	amitriptyline - PC3	-0.463	2	-0.568	0.3752	0.5182	100
697	tetrandrine - MCF7	-0.557	2	-0.568	0.37582	0.2712	100
698	atracurium besilate - MCF7	0.257	2	0.567	0.3761	0.5058	50
699	nicergoline - MCF7	-0.523	2	-0.567	0.37703	0.4671	100
700	(-)-MK-801 - MCF7	-0.558	2	-0.567	0.37777	0.4588	100
701	mycophenolic acid - MCF7	-0.6	2	-0.566	0.37793	0.5437	100
702	hydrastine hydrochloride - MCF7	-0.486	2	-0.566	0.37819	0.4162	100
703	CP-944629 - PC3	-0.415	2	-0.566	0.37846	0.6396	100
704	homatropine - MCF7	0.399	2	0.564	0.37976	0.3457	50
705	AH-6809 - PC3	-0.397	2	-0.565	0.38025	0.4805	100
706	hyoscyamine - MCF7	-0.587	2	-0.563	0.38357	0.515	100
707	rolitetracycline - MCF7	-0.55	2	-0.563	0.38379	0.68	100
708	diprophylline - PC3	0.314	2	0.56	0.38719	0.4191	50
709	crotamiton - MCF7	-0.424	2	-0.56	0.38811	0.5914	100
710	16,16-dimethylprostaglandin E2 - PC3	-0.469	2	-0.56	0.38876	0.438	100
711	asiaticoside - MCF7	-0.501	2	-0.558	0.39115	0.5917	100
712	vitexin - MCF7	-0.48	2	-0.558	0.39196	0.6061	100
713	troleandomycin - PC3	-0.447	2	-0.558	0.3922	0.4356	100
714	gabapentin - MCF7	-0.423	2	-0.558	0.39266	0.3882	100
715	sulfathiazole - PC3	0.206	2	0.556	0.39346	0.4851	50
716	cotinine - PC3	-0.471	2	-0.557	0.39415	0.717	100
717	fusaric acid - MCF7	-0.514	2	-0.556	0.39536	0.6051	100
718	ciclacillin - PC3	0.293	2	0.554	0.39662	0.3521	50
719	apomorphine - MCF7	-0.548	2	-0.555	0.39727	0.515	100
720	doxylamine - PC3	-0.398	2	-0.555	0.39745	0.495	100
721	proglumide - PC3	-0.476	2	-0.554	0.39801	0.5026	100
722	NU-1025 - MCF7	-0.408	2	-0.554	0.39854	0.3817	100
723	dosulepin - MCF7	-0.476	2	-0.552	0.40117	0.272	100
724	pizotifen - MCF7	-0.427	2	-0.552	0.40147	0.2397	100
725	naftifine - MCF7	-0.423	2	-0.552	0.4023	0.5034	100
726	Prestwick-981 - MCF7	0.22	2	0.551	0.40264	0.4079	50
727	genistein - PC3	0.215	3	0.471	0.40273	0.4228	66
728	noscapine - MCF7	0.32	2	0.55	0.40348	0.2561	50
729	tonzonium bromide - MCF7	-0.455	2	-0.551	0.40463	0.5	100
730	norfloxacin - MCF7	-0.457	2	-0.55	0.40509	0.4044	100
731	dobutamine - MCF7	-0.493	2	-0.55	0.40556	0.4524	100
732	isocarboxazid - MCF7	0.334	2	0.549	0.40658	0.4935	50
733	aminophenazone - PC3	-0.45	2	-0.549	0.40731	0.2885	100
734	sirolimus - PC3	-0.282	8	-0.296	0.40797	0.7394	50
735	PF-00875133-00 - MCF7	-0.475	2	-0.548	0.4095	0.329	100
736	tinidazole - PC3	-0.461	2	-0.547	0.41051	0.508	100
737	nordihydroguaiaretic acid - HL60	-0.3	3	-0.468	0.41076	0.4106	66
738	tetramisole - MCF7	-0.425	2	-0.547	0.41111	0.3558	100
739	kawain - PC3	-0.418	2	-0.547	0.41133	0.4556	100
740	ciclacillin - MCF7	0.171	2	0.546	0.41143	0.2483	50
741	H-7 - PC3	-0.43	2	-0.546	0.413	0.7574	100
742	idoxuridine - MCF7	-0.444	2	-0.544	0.41523	0.2603	100
743	naloxone - PC3	-0.463	2	-0.544	0.4156	0.7857	100
744	dicycloverine - MCF7	-0.458	2	-0.543	0.41805	0.4918	100
745	PHA-00767505E - MCF7	0.238	2	0.542	0.41946	0.3985	50
746	tacrine - MCF7	0.335	2	0.541	0.42002	0.2166	50
747	quinisocaine - MCF7	-0.562	2	-0.542	0.42026	0.3145	100
748	ethotoin - MCF7	-0.468	3	-0.464	0.42144	0.6961	66
749	acetylsalicylsalicylic acid - MCF7	-0.361	2	-0.541	0.42155	0.5855	100
750	demeclocycline - MCF7	-0.349	3	-0.464	0.42172	0.546	66
751	betaxolol - MCF7	-0.553	2	-0.541	0.42246	0.6099	100
752	dirithromycin - MCF7	-0.52	2	-0.54	0.42346	0.4756	100
753	salbutamol - MCF7	-0.474	2	-0.54	0.42437	0.2949	100
754	lorglumide - MCF7	-0.342	3	-0.463	0.42479	0.6966	66
755	colforsin - MCF7	-0.524	2	-0.537	0.42956	0.3689	100
756	lomustine - MCF7	-0.479	2	-0.536	0.43016	0.6299	100
757	denatonium benzoate - MCF7	-0.414	2	-0.536	0.43041	0.5342	100
758	diphenhydramine - PC3	0.319	2	0.535	0.43161	0.5115	50
759	BAS-012416453 - MCF7	0.256	2	0.535	0.4322	0.5705	50
760	0316684-0000 - PC3	0.373	2	0.535	0.43268	0.7107	50
761	aminoglutethimide - MCF7	0.298	2	0.534	0.43423	0.4626	50
762	ketoprofen - PC3	-0.51	2	-0.533	0.43495	0.32	100
763	vincamine - PC3	0.275	2	0.533	0.43678	0.5137	50
764	indometacin - MCF7	-0.263	4	-0.399	0.43767	0.5636	50
765	ofloxacin - PC3	0.226	2	0.532	0.43843	0.2672	50
766	orphenadrine - PC3	0.299	2	0.531	0.43962	0.6758	50
767	bromopride - MCF7	-0.403	3	-0.457	0.44015	0.3677	66
768	nomifensine - MCF7	-0.546	2	-0.529	0.44262	0.5936	100
769	5155877 - MCF7	0.381	2	0.529	0.44364	0.5	50
770	tolnaftate - PC3	-0.399	2	-0.529	0.44376	0.548	100
771	labetalol - MCF7	-0.417	2	-0.529	0.44395	0.4167	100
772	sirolimus - HL60	-0.253	10	-0.258	0.44474	0.6786	50
773	prazosin - MCF7	-0.387	4	-0.396	0.4458	0.4825	75
774	domperidone - MCF7	-0.473	2	-0.527	0.4461	0.5359	100
775	0173570-0000 - MCF7	-0.296	2	-0.527	0.44694	0.5056	50
776	apramycin - MCF7	0.274	2	0.524	0.45151	0.2556	50
777	PNU-0230031 - MCF7	-0.438	4	-0.393	0.45666	0.4973	75
778	velnacrine - MCF7	0.287	2	0.521	0.45706	0.3724	50
779	chloropyramine - MCF7	-0.216	2	-0.521	0.45777	0.559	50
780	ethisterone - MCF7	0.21	3	0.449	0.45846	0.3885	66
781	amodiaquine - MCF7	-0.288	2	-0.52	0.45849	0.5267	50
782	fusidic acid - MCF7	0.39	2	0.519	0.46179	0.3222	50
783	khellin - PC3	0.295	2	0.518	0.4632	0.4331	50
784	kaempferol - MCF7	0.24	2	0.517	0.4657	0.4	50
785	dehydrocholic acid - MCF7	-0.267	2	-0.512	0.47479	0.6868	50
786	cinchocaine - PC3	-0.273	2	-0.512	0.47632	0.8458	50
787	diflunisal - MCF7	0.338	2	0.509	0.48097	0.2138	50
788	disulfiram - PC3	-0.196	2	-0.509	0.48181	0.5407	50
789	imipenem - MCF7	-0.285	2	-0.508	0.48332	0.6744	50
790	depudecin - MCF7	0.268	2	0.505	0.4892	0.4625	50
791	betulin - MCF7	0.285	2	0.504	0.49006	0.3446	50
792	buflomedil - MCF7	-0.216	2	-0.503	0.493	0.6213	50
793	0317956-0000 - MCF7	0.091	4	0.38	0.49319	0.7188	50
794	alpha-estradiol - HL60	-0.381	3	-0.437	0.49381	0.675	66
795	mephentermine - MCF7	0.35	2	0.501	0.49632	0.5301	50
796	atropine oxide - PC3	-0.313	2	-0.5	0.49799	0.7541	50
797	proxymetacaine - MCF7	0.215	2	0.5	0.49837	0.3608	50
798	10-methoxyharmalan - MCF7	0.312	2	0.5	0.49911	0.3608	50
799	scopolamine N-oxide - PC3	-0.247	2	-0.499	0.50215	0.8779	50
800	SC-19220 - PC3	0.264	2	0.499	0.50336	0.5329	50
801	cyanocobalamin - MCF7	0.143	2	0.499	0.50412	0.2868	50
802	dinoprostone - MCF7	0.191	2	0.499	0.50473	0.383	50
803	pempidine - MCF7	-0.379	3	-0.433	0.50543	0.5549	66
804	sotalol - MCF7	0.12	2	0.498	0.50547	0.3384	50
805	alfuzosin - MCF7	-0.347	3	-0.432	0.50689	0.6526	66
806	epiandrosterone - MCF7	-0.241	2	-0.497	0.50889	0.5442	50
807	phenazopyridine - MCF7	-0.43	2	-0.497	0.50964	0.4459	50
808	tolazoline - PC3	-0.269	2	-0.497	0.51097	0.7389	50
809	BCB000040 - MCF7	0.171	2	0.497	0.51185	0.4148	50
810	zimeldine - PC3	-0.427	2	-0.497	0.51243	0.8374	50
811	diltiazem - PC3	-0.294	2	-0.496	0.51334	0.8018	50
812	bezafibrate - MCF7	-0.291	2	-0.496	0.514	0.7766	50
813	desoxycortone - MCF7	-0.09	2	-0.496	0.514	0.3693	50
814	ergocalciferol - MCF7	0.078	2	0.496	0.51563	0.5632	50
815	chlortetracycline - MCF7	0.087	2	0.495	0.51666	0.1802	50
816	flavoxate - MCF7	-0.127	2	-0.495	0.51758	0.2866	50
817	indometacin - PC3	0.238	2	0.495	0.51877	0.3642	50
818	lynestrenol - MCF7	-0.421	2	-0.495	0.5203	0.2973	50
819	pseudopelletierine - MCF7	-0.309	2	-0.495	0.5203	0.7077	50
820	5255229 - MCF7	-0.203	2	-0.494	0.52153	0.3771	50
821	Prestwick-685 - PC3	-0.329	2	-0.494	0.52215	0.8465	50
822	isoconazole - MCF7	-0.419	2	-0.494	0.52312	0.3441	50
823	diethylcarbamazine - MCF7	0.035	2	0.494	0.52328	0.1773	50
824	carbamazepine - PC3	0.4	2	0.493	0.52439	0.4207	50
825	SC-19220 - MCF7	-0.332	2	-0.493	0.52599	0.5159	50
826	lobeline - MCF7	0.033	2	0.493	0.5264	0.25	50
827	ribostamycin - MCF7	0.131	2	0.493	0.5269	0.3819	50
828	tremorine - MCF7	0.305	2	0.492	0.52865	0.3016	50
829	pheniramine - PC3	-0.162	2	-0.492	0.5307	0.5722	50
830	succinylsulfathiazole - MCF7	0.128	2	0.491	0.53225	0.3174	50
831	dipivefrine - MCF7	-0.191	2	-0.491	0.5332	0.4578	50
832	ketanserin - MCF7	-0.319	2	-0.49	0.5364	0.768	50
833	propidium iodide - MCF7	-0.41	2	-0.49	0.5364	0.3258	50
834	hexylcaine - MCF7	0.16	2	0.49	0.53865	0.2958	50
835	ionomycin - MCF7	-0.431	3	-0.421	0.53884	0.5984	66
836	butacaine - MCF7	0.195	2	0.49	0.53927	0.4306	50
837	naloxone - MCF7	-0.387	3	-0.42	0.54062	0.5093	66
838	progesterone - MCF7	-0.409	2	-0.489	0.54115	0.5256	50
839	isoxsuprine - PC3	-0.169	2	-0.489	0.54225	0.5959	50
840	parbendazole - PC3	0.192	2	0.489	0.5428	0.4375	50
841	triprolidine - MCF7	0.134	2	0.488	0.5434	0.2794	50
842	nimesulide - MCF7	-0.262	2	-0.489	0.54356	0.5523	50
843	tretinoin - PC3	-0.394	4	-0.367	0.54395	0.6839	75
844	laudanosine - MCF7	0.115	2	0.488	0.54451	0.3	50
845	metaraminol - MCF7	0.019	2	0.488	0.54513	0.2676	50
846	antimycin A - PC3	-0.284	2	-0.488	0.54551	0.7188	50
847	tropine - MCF7	0.3	2	0.487	0.54706	0.2692	50
848	tetryzoline - MCF7	-0.115	2	-0.487	0.54897	0.3394	50
849	disopyramide - MCF7	-0.277	2	-0.487	0.54996	0.8457	50
850	dydrogesterone - MCF7	-0.17	2	-0.487	0.55042	0.4573	50
851	theobromine - MCF7	-0.35	2	-0.487	0.55042	0.75	50
852	picotamide - PC3	-0.402	2	-0.486	0.55207	0.8	50
853	5253409 - MCF7	-0.402	2	-0.486	0.55286	0.3248	50
854	norethisterone - MCF7	-0.356	2	-0.486	0.55412	0.6447	50
855	tranylcypromine - PC3	-0.305	2	-0.485	0.55551	0.8827	50
856	thapsigargin - MCF7	-0.24	2	-0.485	0.55607	0.7862	50
857	(+)-chelidonine - MCF7	0.096	2	0.485	0.55674	0.3926	50
858	bephenium hydroxynaphthoate - MCF7	-0.229	3	-0.413	0.55805	0.5478	66
859	chlorogenic acid - MCF7	0.12	2	0.484	0.55905	0.4145	50
860	alprenolol - MCF7	-0.163	2	-0.484	0.5597	0.6142	50
861	benzonatate - PC3	-0.056	2	-0.484	0.56127	0.3486	50
862	prednisone - PC3	0.109	2	0.484	0.56141	0.5168	50
863	mephenesin - PC3	-0.332	2	-0.484	0.56185	0.75	50
864	enalapril - MCF7	0.088	2	0.484	0.56213	0.3099	50
865	5211181 - MCF7	-0.396	2	-0.482	0.56813	0.3778	50
866	SR-95531 - MCF7	-0.395	2	-0.481	0.56996	0.5227	50
867	octopamine - MCF7	-0.261	2	-0.481	0.56996	0.8125	50
868	procaine - PC3	-0.335	2	-0.48	0.57358	0.8088	50
869	metolazone - PC3	0.253	2	0.48	0.57398	0.5446	50
870	carcinine - MCF7	-0.031	2	-0.48	0.5741	0.4863	50
871	dinoprost - MCF7	0.199	2	0.48	0.5772	0.5192	50
872	ciclopirox - MCF7	-0.377	2	-0.479	0.57722	0.6636	50
873	hydroxyachillin - MCF7	-0.392	2	-0.479	0.57722	0.6213	50
874	isosorbide - MCF7	-0.392	2	-0.479	0.57919	0.4678	50
875	calycanthine - MCF7	0.177	2	0.479	0.57961	0.4323	50
876	tracazolate - MCF7	-0.235	2	-0.478	0.58102	0.6194	50
877	debrisoquine - MCF7	0.13	2	0.478	0.58177	0.5232	50
878	estrone - MCF7	-0.079	2	-0.478	0.5835	0.5298	50
879	diphemanil metilsulfate - PC3	0.238	2	0.477	0.58485	0.5369	50
880	pyrantel - PC3	-0.33	2	-0.477	0.5866	0.8995	50
881	acacetin - MCF7	-0.293	3	-0.403	0.58715	0.5742	66
882	bromocriptine - PC3	-0.285	2	-0.477	0.58732	0.8486	50
883	letrozole - MCF7	0.113	2	0.477	0.58748	0.4152	50
884	corbadrine - MCF7	-0.34	2	-0.476	0.59094	0.7727	50
885	0198306-0000 - PC3	-0.388	2	-0.476	0.59157	0.7754	50
886	probucol - MCF7	0.093	4	0.352	0.59223	0.4252	50
887	quinethazone - MCF7	-0.299	2	-0.475	0.59277	0.6704	50
888	cefotiam - MCF7	0.198	2	0.475	0.59472	0.7267	50
889	pargyline - MCF7	-0.326	2	-0.475	0.59497	0.8	50
890	Prestwick-1100 - PC3	-0.206	2	-0.474	0.59555	0.6415	50
891	raloxifene - MCF7	-0.34	3	-0.4	0.59573	0.6276	66
892	heliotrine - PC3	-0.386	2	-0.474	0.59627	0.631	50
893	amiprilose - MCF7	-0.066	2	-0.473	0.59988	0.6298	50
894	hydralazine - MCF7	-0.428	3	-0.398	0.60145	0.7098	66
895	primidone - MCF7	-0.064	2	-0.473	0.60177	0.5535	50
896	geldanamycin - PC3	-0.255	2	-0.473	0.60221	0.7556	50
897	harmaline - MCF7	0.013	2	0.472	0.60324	0.45	50
898	risperidone - MCF7	-0.078	2	-0.472	0.6039	0.3372	50
899	PNU-0293363 - PC3	-0.385	2	-0.472	0.60521	0.5244	50
900	hydrastinine - PC3	-0.285	2	-0.472	0.60521	0.8107	50
901	bupivacaine - MCF7	-0.012	2	-0.471	0.60651	0.483	50
902	tiabendazole - MCF7	-0.357	2	-0.471	0.60893	0.7882	50
903	streptozocin - MCF7	0.121	2	0.471	0.60939	0.5816	50
904	sulfachlorpyridazine - PC3	0.069	2	0.471	0.60939	0.458	50
905	azathioprine - MCF7	-0.317	4	-0.348	0.61004	0.7133	75
906	nalbuphine - PC3	0.206	2	0.47	0.61156	0.7463	50
907	8-azaguanine - MCF7	-0.383	2	-0.47	0.61163	0.8194	50
908	0198306-0000 - MCF7	-0.232	2	-0.47	0.61235	0.7124	50
909	harman - MCF7	-0.344	2	-0.47	0.61289	0.7459	50
910	eticlopride - MCF7	0.169	2	0.469	0.61627	0.7853	50
911	boldine - MCF7	-0.381	2	-0.469	0.61762	0.4555	50
912	phenelzine - MCF7	-0.387	3	-0.392	0.61854	0.579	66
913	oxybenzone - MCF7	0.084	2	0.468	0.61927	0.8	50
914	midecamycin - MCF7	-0.38	2	-0.468	0.61985	0.4941	50
915	flufenamic acid - PC3	-0.295	2	-0.468	0.62052	0.8144	50
916	ivermectin - PC3	-0.379	2	-0.468	0.6212	0.5909	50
917	tiaprofenic acid - MCF7	0.072	2	0.467	0.62146	0.7799	50
918	meteneprost - MCF7	0.106	2	0.466	0.62496	0.6529	50
919	phenindione - MCF7	-0.213	2	-0.466	0.62521	0.6571	50
920	sulfaguanidine - PC3	-0.31	2	-0.466	0.62696	0.8636	50
921	chlormezanone - MCF7	0.145	2	0.465	0.62822	0.6111	50
922	solanine - MCF7	-0.377	2	-0.465	0.62889	0.4756	50
923	flurbiprofen - MCF7	-0.333	3	-0.388	0.62914	0.7706	66
924	atropine oxide - MCF7	0.032	2	0.465	0.62987	0.6747	50
925	wortmannin - PC3	-0.287	2	-0.465	0.63052	0.726	50
926	orlistat - PC3	0.137	2	0.465	0.6306	0.3214	50
927	Prestwick-674 - PC3	-0.269	2	-0.464	0.63219	0.589	50
928	cimetidine - MCF7	0.098	2	0.464	0.63255	0.655	50
929	liothyronine - MCF7	-0.345	2	-0.464	0.63275	0.7446	50
930	BCB000038 - PC3	0.054	2	0.464	0.63402	0.5643	50
931	dihydrostreptomycin - MCF7	-0.376	2	-0.464	0.6342	0.5	50
932	imidurea - MCF7	-0.213	2	-0.464	0.63476	0.7263	50
933	spiradoline - PC3	-0.376	2	-0.464	0.63537	0.7135	50
934	lithocholic acid - MCF7	-0.427	3	-0.385	0.63841	0.6011	66
935	erastin - PC3	0.073	2	0.462	0.63939	0.7809	50
936	terbutaline - MCF7	-0.375	2	-0.462	0.64012	0.6391	50
937	epirizole - PC3	0.004	2	0.461	0.64146	0.4218	50
938	lincomycin - MCF7	0.17	2	0.461	0.64251	0.488	50
939	C-75 - PC3	0.078	2	0.461	0.6438	0.6098	50
940	quipazine - MCF7	0.099	2	0.461	0.6442	0.7363	50
941	sitosterol - MCF7	-0.373	2	-0.461	0.64462	0.8656	50
942	esculetin - MCF7	-0.342	2	-0.461	0.64513	0.6443	50
943	allantoin - MCF7	0.11	2	0.46	0.64661	0.6409	50
944	moxisylyte - PC3	-0.285	2	-0.46	0.6477	0.5882	50
945	orlistat - MCF7	-0.286	3	-0.381	0.64857	0.6975	66
946	tamoxifen - MCF7	-0.337	4	-0.337	0.64865	0.6777	75
947	altizide - MCF7	0.11	2	0.459	0.65017	0.697	50
948	dimethadione - MCF7	0.136	2	0.459	0.65017	0.6222	50
949	15(S)-15-methylprostaglandin E2 - PC3	0.082	2	0.458	0.65327	0.8526	50
950	pepstatin - MCF7	0.06	2	0.458	0.65396	0.5556	50
951	dizocilpine - MCF7	-0.045	2	-0.458	0.65494	0.5756	50
952	prilocaine - PC3	-0.048	2	-0.457	0.65643	0.4886	50
953	kawain - MCF7	-0.37	2	-0.457	0.65694	0.458	50
954	promazine - MCF7	-0.344	3	-0.378	0.65696	0.6104	66
955	fenofibrate - MCF7	0.098	2	0.457	0.65706	0.7143	50
956	naltrexone - PC3	0.041	2	0.457	0.65752	0.7447	50
957	vidarabine - MCF7	-0.37	2	-0.457	0.65949	0.821	50
958	gemfibrozil - PC3	-0.271	2	-0.456	0.66092	0.8542	50
959	16-phenyltetranorprostaglandin E2 - PC3	-0.369	2	-0.456	0.66215	0.5586	50
960	5252917 - MCF7	-0.261	2	-0.456	0.66215	0.7349	50
961	7-aminocephalosporanic acid - MCF7	0.148	2	0.455	0.66239	0.7279	50
962	hydroquinine - MCF7	0.086	2	0.455	0.66392	0.7041	50
963	S-propranolol - MCF7	-0.369	2	-0.455	0.66406	0.4315	50
964	isometheptene - MCF7	0.097	2	0.454	0.66456	0.7261	50
965	dapsone - PC3	0.055	2	0.454	0.66567	0.4061	50
966	phenformin - MCF7	-0.22	4	-0.331	0.66717	0.5839	50
967	tolbutamide - MCF7	-0.264	4	-0.331	0.66717	0.5912	75
968	metrifonate - MCF7	-0.243	2	-0.454	0.66726	0.771	50
969	mestranol - MCF7	-0.227	2	-0.454	0.66844	0.694	50
970	dl-alpha tocopherol - MCF7	0.056	2	0.453	0.66919	0.4087	50
971	lactobionic acid - MCF7	-0.009	2	0.453	0.66961	0.5271	50
972	halofantrine - MCF7	0.075	2	0.453	0.67021	0.8047	50
973	brompheniramine - MCF7	0.045	2	0.452	0.67086	0.5	50
974	oxyphenbutazone - MCF7	-0.107	2	-0.453	0.67174	0.5959	50
975	N-acetylmuramic acid - MCF7	0.043	2	0.451	0.67671	0.5068	50
976	isoxsuprine - MCF7	0.04	2	0.451	0.6772	0.7941	50
977	tranylcypromine - MCF7	-0.338	2	-0.451	0.67734	0.7853	50
978	carteolol - MCF7	0.152	2	0.45	0.6805	0.7181	50
979	talampicillin - MCF7	-0.365	2	-0.45	0.68054	0.7341	50
980	exisulind - MCF7	0.163	2	0.449	0.68146	0.6739	50
981	epivincamine - MCF7	-0.364	2	-0.45	0.68162	0.6191	50
982	ketoconazole - MCF7	-0.364	2	-0.449	0.68337	0.6089	50
983	sisomicin - MCF7	-0.364	2	-0.449	0.68382	0.6114	50
984	rimexolone - MCF7	-0.332	2	-0.449	0.68601	0.8521	50
985	fenbendazole - PC3	0.035	2	0.446	0.69062	0.6963	50
986	glimepiride - MCF7	-0.034	2	-0.447	0.69124	0.5062	50
987	netilmicin - MCF7	0.066	2	0.446	0.69241	0.631	50
988	lysergol - MCF7	-0.319	2	-0.445	0.69697	0.7024	50
989	erythromycin - MCF7	0.095	2	0.444	0.69776	0.6077	50
990	piperine - MCF7	-0.107	2	-0.445	0.69814	0.5872	50
991	moracizine - MCF7	0.109	2	0.444	0.6987	0.7126	50
992	erythromycin - PC3	-0.288	2	-0.444	0.69889	0.7127	50
993	acetohexamide - MCF7	0.122	2	0.444	0.69923	0.6429	50
994	ethosuximide - PC3	-0.114	2	-0.444	0.69961	0.6124	50
995	mefexamide - MCF7	0.121	2	0.443	0.70041	0.5714	50
996	nialamide - PC3	-0.264	2	-0.444	0.70064	0.8781	50
997	moroxydine - PC3	-0.276	2	-0.444	0.70106	0.75	50
998	gallamine triethiodide - PC3	0.136	2	0.443	0.70138	0.6831	50
999	isoniazid - MCF7	0.128	2	0.443	0.70267	0.65	50
1000	cefotaxime - MCF7	0.141	2	0.442	0.70313	0.5306	50
1001	alpha-ergocryptine - MCF7	-0.366	3	-0.361	0.70335	0.6871	66
1002	pyrimethamine - PC3	-0.234	2	-0.443	0.70377	0.7219	50
1003	AR-A014418 - PC3	0.091	2	0.442	0.70385	0.7063	50
1004	sulfinpyrazone - MCF7	-0.359	2	-0.442	0.70416	0.7714	50
1005	mephenesin - MCF7	-0.085	2	-0.442	0.70532	0.5522	50
1006	bucladesine - MCF7	-0.081	4	0.319	0.70542	0.6821	50
1007	3-nitropropionic acid - MCF7	-0.237	2	-0.442	0.70615	0.7904	50
1008	papaverine - MCF7	-0.311	2	-0.441	0.70736	0.8069	50
1009	flutamide - PC3	-0.314	2	-0.441	0.70842	0.6981	50
1010	chlorpropamide - MCF7	-0.33	4	-0.318	0.71046	0.6872	50
1011	pirenzepine - PC3	-0.209	2	-0.44	0.71218	0.7063	50
1012	AG-012559 - PC3	0.071	2	0.439	0.71263	0.6748	50
1013	dicycloverine - PC3	-0.287	2	-0.439	0.71267	0.7	50
1014	prednicarbate - MCF7	0.037	2	0.439	0.71359	0.6707	50
1015	thiocolchicoside - MCF7	-0.241	2	-0.439	0.71367	0.795	50
1016	mefenamic acid - PC3	0.042	2	0.439	0.71402	0.5	50
1017	lidoflazine - MCF7	0.07	2	0.439	0.71444	0.6667	50
1018	cyclopenthiazide - MCF7	0.071	2	0.439	0.71544	0.6532	50
1019	cyclopentolate - MCF7	-0.358	2	-0.438	0.71544	0.6369	50
1020	bethanechol - MCF7	0.057	2	0.438	0.71623	0.6383	50
1021	flumetasone - PC3	-0.299	2	-0.438	0.71738	0.8235	50
1022	gallamine triethiodide - MCF7	-0.357	2	-0.438	0.71738	0.8261	50
1023	solasodine - MCF7	-0.377	3	-0.357	0.71747	0.7515	66
1024	tetracaine - MCF7	0.047	2	0.438	0.7176	0.7785	50
1025	Prestwick-983 - MCF7	0.136	2	0.437	0.7186	0.8805	50
1026	palmatine - MCF7	0.027	2	0.437	0.7186	0.4255	50
1027	hecogenin - MCF7	-0.273	2	-0.437	0.71911	0.785	50
1028	mometasone - MCF7	-0.357	2	-0.437	0.71911	0.5285	50
1029	acenocoumarol - PC3	0.091	2	0.436	0.72178	0.7262	50
1030	CP-863187 - PC3	-0.338	2	-0.436	0.72267	0.8171	50
1031	tenoxicam - MCF7	0.007	2	0.436	0.72297	0.5448	50
1032	torasemide - MCF7	-0.351	2	-0.436	0.72321	0.843	50
1033	todralazine - PC3	0.103	2	0.435	0.7244	0.6454	50
1034	tribenoside - MCF7	-0.356	2	-0.435	0.72484	0.5873	50
1035	solasodine - PC3	-0.282	2	-0.435	0.7254	0.9022	50
1036	trichlormethiazide - MCF7	-0.298	2	-0.435	0.72577	0.7947	50
1037	CP-944629 - MCF7	0.038	2	0.435	0.72583	0.7101	50
1038	dicoumarol - PC3	0.032	2	0.435	0.72583	0.5252	50
1039	chlorprothixene - MCF7	-0.055	2	-0.435	0.72623	0.5962	50
1040	isopropamide iodide - MCF7	-0.004	2	0.434	0.72742	0.5693	50
1041	ursolic acid - PC3	-0.355	2	-0.434	0.72903	0.6861	50
1042	nordihydroguaiaretic acid - PC3	-0.095	2	-0.434	0.72953	0.5833	50
1043	verapamil - PC3	-0.084	2	-0.433	0.72995	0.6686	50
1044	wortmannin - HL60	-0.378	4	-0.312	0.73035	0.879	75
1045	calcium pantothenate - MCF7	-0.272	2	-0.433	0.73053	0.8882	50
1046	retrorsine - MCF7	-0.354	2	-0.433	0.73053	0.6141	50
1047	lithocholic acid - PC3	0.039	2	0.433	0.73106	0.8563	50
1048	ciclosporin - MCF7	-0.191	4	-0.312	0.73107	0.7554	75
1049	rosiglitazone - HL60	-0.008	4	0.311	0.73262	0.7	50
1050	fluorocurarine - MCF7	-0.344	2	-0.432	0.73418	0.7636	50
1051	idoxuridine - PC3	0.108	2	0.432	0.73468	0.7161	50
1052	capsaicin - MCF7	-0.251	2	-0.432	0.73472	0.7346	50
1053	ioxaglic acid - MCF7	0.099	2	0.432	0.7351	0.7987	50
1054	dextromethorphan - MCF7	-0.353	2	-0.431	0.73554	0.6688	50
1055	protriptyline - MCF7	-0.353	2	-0.431	0.73703	0.6117	50
1056	canrenoic acid - MCF7	0.123	2	0.431	0.73721	0.5214	50
1057	pioglitazone - MCF7	-0.109	6	-0.258	0.73746	0.7836	66
1058	ornidazole - MCF7	0.029	2	0.431	0.73772	0.6767	50
1059	verapamil - MCF7	-0.402	3	-0.349	0.7385	0.6971	66
1060	hexamethonium bromide - PC3	-0.246	2	-0.43	0.73854	0.7168	50
1061	CP-863187 - MCF7	0.099	2	0.43	0.73953	0.8535	50
1062	nilutamide - MCF7	-0.353	2	-0.43	0.73963	0.5747	50
1063	fenoprofen - MCF7	-0.407	3	-0.348	0.73986	0.861	66
1064	copper sulfate - MCF7	0.07	2	0.429	0.74108	0.8316	50
1065	nomifensine - PC3	-0.129	2	-0.429	0.7414	0.7186	50
1066	glipizide - MCF7	-0.007	2	0.429	0.74152	0.5745	50
1067	adenosine phosphate - MCF7	-0.001	2	0.429	0.7419	0.5455	50
1068	metronidazole - PC3	0.121	2	0.429	0.7419	0.8701	50
1069	alpha-ergocryptine - PC3	-0.352	2	-0.429	0.74369	0.7363	50
1070	nicardipine - MCF7	-0.258	2	-0.428	0.745	0.7032	50
1071	suramin sodium - MCF7	-0.325	2	-0.428	0.74595	0.8778	50
1072	levodopa - MCF7	0.109	2	0.426	0.74989	0.5972	50
1073	erastin - MCF7	-0.24	2	-0.426	0.75043	0.8188	50
1074	urapidil - MCF7	-0.35	2	-0.426	0.75043	0.7771	50
1075	epirizole - MCF7	-0.323	2	-0.426	0.7519	0.8297	50
1076	flumetasone - MCF7	-0.206	3	-0.344	0.7525	0.7903	66
1077	zimeldine - MCF7	-0.331	2	-0.425	0.75444	0.8497	50
1078	norfloxacin - PC3	-0.331	2	-0.424	0.75764	0.8873	50
1079	cicloheximide - MCF7	-0.304	2	-0.424	0.75804	0.8321	50
1080	aceclofenac - PC3	0.117	2	0.423	0.76041	0.6258	50
1081	tridihexethyl - MCF7	-0.01	2	0.421	0.76462	0.6528	50
1082	clofibrate - MCF7	-0.234	2	-0.421	0.76532	0.6259	50
1083	ioversol - MCF7	-0.348	2	-0.421	0.76576	0.7514	50
1084	isotretinoin - MCF7	-0.25	2	-0.421	0.76576	0.7958	50
1085	meclozine - MCF7	-0.387	3	-0.338	0.76661	0.8207	66
1086	triamcinolone - PC3	0.061	2	0.421	0.76677	0.7203	50
1087	colistin - MCF7	0.041	2	0.42	0.76866	0.9061	50
1088	azlocillin - MCF7	-0.347	2	-0.42	0.76892	0.7622	50
1089	sulindac - MCF7	0.153	4	0.299	0.76972	0.8136	50
1090	oleandomycin - PC3	-0.346	2	-0.42	0.76977	0.8297	50
1091	acemetacin - MCF7	0.115	2	0.419	0.77116	0.7657	50
1092	0316684-0000 - MCF7	-0.346	2	-0.419	0.77132	0.875	50
1093	R-atenolol - MCF7	-0.002	2	0.419	0.77293	0.6803	50
1094	cimetidine - PC3	-0.237	2	-0.418	0.77353	0.8395	50
1095	triamterene - PC3	-0.046	2	-0.418	0.77429	0.7899	50
1096	phensuximide - MCF7	-0.295	2	-0.418	0.77552	0.838	50
1097	hydrocortisone - MCF7	-0.141	2	-0.417	0.77582	0.7977	50
1098	sulfapyridine - MCF7	-0.212	2	-0.417	0.77665	0.8129	50
1099	diflorasone - MCF7	-0.259	2	-0.417	0.77707	0.8676	50
1100	rolipram - MCF7	-0.324	2	-0.417	0.77792	0.8242	50
1101	gelsemine - MCF7	-0.082	2	-0.416	0.77961	0.6201	50
1102	paroxetine - PC3	-0.344	2	-0.416	0.78007	0.6489	50
1103	Prestwick-665 - MCF7	-0.344	2	-0.415	0.78085	0.7333	50
1104	SR-95639A - MCF7	-0.261	2	-0.415	0.78144	0.7202	50
1105	glycocholic acid - MCF7	0.008	2	0.415	0.78303	0.7417	50
1106	pridinol - MCF7	-0.237	2	-0.415	0.78317	0.8093	50
1107	gliquidone - MCF7	0.065	2	0.414	0.78506	0.6552	50
1108	citiolone - PC3	-0.263	2	-0.414	0.78534	0.9485	50
1109	SB-202190 - PC3	-0.3	2	-0.413	0.78576	0.7308	50
1110	metanephrine - MCF7	0.085	2	0.414	0.78584	0.7988	50
1111	meprylcaine - MCF7	-0.344	2	-0.413	0.78625	0.7784	50
1112	pirinixic acid - PC3	-0.221	2	-0.413	0.78625	0.8554	50
1113	benzydamine - MCF7	-0.343	2	-0.412	0.78878	0.7959	50
1114	dorzolamide - MCF7	-0.271	2	-0.412	0.7892	0.7533	50
1115	cefixime - MCF7	-0.015	2	0.413	0.78922	0.6387	50
1116	mesoridazine - MCF7	-0.031	2	-0.412	0.78989	0.7887	50
1117	prasterone - MCF7	0.006	2	0.412	0.79033	0.8824	50
1118	roxarsone - MCF7	-0.268	2	-0.412	0.79035	0.8344	50
1119	metrifonate - PC3	0.018	2	0.412	0.79184	0.5736	50
1120	pirinixic acid - MCF7	-0.342	2	-0.41	0.79375	0.7337	50
1121	alsterpaullone - PC3	-0.265	2	-0.41	0.79427	0.8768	50
1122	valinomycin - PC3	0.035	2	0.411	0.79443	0.8525	50
1123	(+/-)-catechin - MCF7	-0.341	2	-0.41	0.79454	0.7964	50
1124	proxyphylline - MCF7	-0.333	2	-0.41	0.79548	0.8474	50
1125	betazole - MCF7	-0.341	2	-0.408	0.79832	0.7841	50
1126	anabasine - MCF7	-0.305	2	-0.408	0.79878	0.858	50
1127	Prestwick-1100 - MCF7	-0.139	2	-0.408	0.80023	0.7673	50
1128	lisinopril - MCF7	-0.247	2	-0.407	0.80138	0.8353	50
1129	PHA-00846566E - PC3	0.047	2	0.408	0.80182	0.6986	50
1130	spironolactone - PC3	0.059	2	0.408	0.80218	0.7831	50
1131	cytisine - MCF7	-0.032	2	-0.407	0.80305	0.6437	50
1132	Trolox C - MCF7	-0.326	2	-0.406	0.80451	0.7514	50
1133	thiamazole - PC3	0.096	2	0.406	0.80572	0.8742	50
1134	cyproheptadine - PC3	-0.294	2	-0.406	0.80592	0.8014	50
1135	benfluorex - MCF7	0.004	2	0.406	0.80677	0.8779	50
1136	gossypol - PC3	-0.324	2	-0.405	0.80866	0.8188	50
1137	triamterene - MCF7	-0.107	2	-0.404	0.8094	0.75	50
1138	PF-01378883-00 - MCF7	-0.014	2	0.405	0.80963	0.8712	50
1139	physostigmine - MCF7	-0.244	2	-0.404	0.81087	0.787	50
1140	spiramycin - PC3	0.059	2	0.404	0.81105	0.6049	50
1141	sulpiride - MCF7	-0.243	2	-0.403	0.8116	0.8541	50
1142	hesperidin - MCF7	-0.003	2	0.403	0.81218	0.6375	50
1143	amikacin - MCF7	-0.087	2	-0.403	0.81309	0.7181	50
1144	lynestrenol - PC3	-0.219	2	-0.403	0.81309	0.8267	50
1145	serotonin - MCF7	-0.231	3	-0.325	0.8134	0.8012	66
1146	thiethylperazine - MCF7	-0.033	2	-0.402	0.81389	0.6596	50
1147	guaifenesin - PC3	-0.285	2	-0.402	0.8153	0.9397	50
1148	prednisone - MCF7	0.068	2	0.402	0.81645	0.7898	50
1149	PNU-0230031 - PC3	-0.213	4	-0.284	0.81718	0.8865	50
1150	hesperetin - PC3	-0.013	2	0.401	0.8188	0.6803	50
1151	salsolinol - MCF7	-0.337	2	-0.4	0.81938	0.6977	50
1152	morantel - PC3	-0.293	2	-0.4	0.81985	0.925	50
1153	flucloxacillin - MCF7	-0.156	2	-0.398	0.82343	0.8462	50
1154	deferoxamine - PC3	-0.174	3	-0.322	0.82475	0.8951	66
1155	terguride - MCF7	-0.068	4	0.281	0.82532	0.771	50
1156	colforsin - PC3	-0.313	2	-0.398	0.82558	0.7744	50
1157	terguride - HL60	-0.113	2	-0.397	0.82632	0.7065	50
1158	cefepime - MCF7	-0.046	2	-0.397	0.82709	0.6395	50
1159	glipizide - PC3	-0.257	2	-0.396	0.82844	0.9375	50
1160	danazol - MCF7	-0.335	2	-0.396	0.82882	0.7415	50
1161	rifabutin - MCF7	-0.285	2	-0.396	0.82882	0.8952	50
1162	cefazolin - MCF7	0.033	2	0.396	0.82952	0.8256	50
1163	glycopyrronium bromide - MCF7	-0.335	2	-0.395	0.83053	0.8258	50
1164	pirlindole - MCF7	0.057	2	0.396	0.83131	0.8302	50
1165	flunixin - MCF7	-0.25	2	-0.395	0.83196	0.9112	50
1166	L-methionine sulfoximine - MCF7	0.038	2	0.394	0.83383	0.7681	50
1167	pregnenolone - MCF7	0.01	2	0.394	0.83425	0.9497	50
1168	NS-398 - MCF7	0.042	2	0.394	0.83449	0.8264	50
1169	piretanide - MCF7	0.002	2	0.394	0.83449	0.75	50
1170	chloramphenicol - PC3	-0.245	2	-0.393	0.8354	0.9172	50
1171	AG-028671 - PC3	-0.315	2	-0.393	0.83602	0.8971	50
1172	bromopride - PC3	-0.334	2	-0.392	0.83906	0.7955	50
1173	benfotiamine - MCF7	-0.278	3	-0.316	0.842	0.7974	66
1174	Prestwick-1080 - MCF7	0.077	2	0.391	0.84202	0.7923	50
1175	sodium phenylbutyrate - HL60	-0.237	2	-0.391	0.8421	0.9074	50
1176	tiletamine - MCF7	0.039	2	0.39	0.84333	0.7544	50
1177	BCB000039 - PC3	-0.285	2	-0.39	0.84405	0.7108	50
1178	adrenosterone - MCF7	-0.241	2	-0.389	0.8463	0.8926	50
1179	alpha-yohimbine - MCF7	0.065	2	0.388	0.84691	0.9281	50
1180	flecainide - PC3	-0.019	2	0.388	0.84729	0.8054	50
1181	CP-645525-01 - MCF7	-0.297	2	-0.388	0.84862	0.9225	50
1182	cefadroxil - MCF7	0.055	2	0.387	0.84982	0.7674	50
1183	betonicine - MCF7	-0.239	3	-0.314	0.85035	0.8198	66
1184	nifenazone - MCF7	-0.331	2	-0.387	0.85079	0.858	50
1185	propranolol - MCF7	-0.08	2	-0.387	0.85111	0.7824	50
1186	hydroxyzine - MCF7	-0.229	2	-0.386	0.85244	0.6813	50
1187	oxolamine - MCF7	0.008	2	0.386	0.85335	0.8805	50
1188	dexibuprofen - MCF7	-0.331	2	-0.385	0.85477	0.8402	50
1189	sparteine - MCF7	-0.03	2	0.385	0.85518	0.7956	50
1190	todralazine - MCF7	-0.33	2	-0.385	0.85522	0.8647	50
1191	metoclopramide - PC3	-0.013	2	0.384	0.8564	0.7261	50
1192	spironolactone - MCF7	-0.283	2	-0.383	0.85801	0.939	50
1193	etodolac - MCF7	0.009	2	0.382	0.85962	0.922	50
1194	nifedipine - PC3	0.006	2	0.382	0.85962	0.7826	50
1195	quinidine - MCF7	-0.087	2	-0.381	0.86302	0.8137	50
1196	betonicine - PC3	0.008	2	0.38	0.86399	0.9007	50
1197	zoxazolamine - MCF7	-0.015	2	0.379	0.86723	0.8276	50
1198	pentolonium - MCF7	-0.022	2	0.378	0.86765	0.8589	50
1199	tiratricol - MCF7	-0.314	2	-0.378	0.86811	0.8196	50
1200	glycopyrronium bromide - PC3	-0.247	2	-0.378	0.86916	0.8961	50
1201	naphazoline - MCF7	0.012	2	0.378	0.86922	0.76	50
1202	telenzepine - MCF7	-0.327	2	-0.378	0.86958	0.8075	50
1203	fluvastatin - MCF7	-0.015	2	0.378	0.86976	0.8836	50
1204	etofylline - PC3	-0.3	2	-0.377	0.87077	0.8342	50
1205	alcuronium chloride - MCF7	-0.28	2	-0.377	0.87117	0.9096	50
1206	cefuroxime - MCF7	-0.001	2	0.377	0.87143	0.7815	50
1207	gemfibrozil - MCF7	0.052	2	0.377	0.87172	0.8993	50
1208	proadifen - MCF7	-0.312	2	-0.377	0.87182	0.8532	50
1209	chlorcyclizine - MCF7	-0.233	3	-0.306	0.87337	0.9011	66
1210	mexiletine - PC3	-0.306	2	-0.376	0.87339	0.8415	50
1211	diazoxide - PC3	0.044	2	0.376	0.87369	0.7815	50
1212	mafenide - PC3	0	2	0.375	0.87429	0.8357	50
1213	diphenylpyraline - PC3	0.047	2	0.374	0.87646	0.7829	50
1214	fluorometholone - MCF7	-0.266	2	-0.374	0.87747	0.8615	50
1215	allantoin - PC3	0.03	2	0.374	0.87753	0.82	50
1216	perhexiline - MCF7	-0.326	2	-0.374	0.87813	0.8982	50
1217	sulfathiazole - MCF7	-0.263	2	-0.373	0.87954	0.8333	50
1218	carbinoxamine - MCF7	0.036	2	0.373	0.8796	0.8792	50
1219	etifenin - MCF7	-0.325	2	-0.373	0.87978	0.8788	50
1220	suloctidil - MCF7	-0.246	2	-0.372	0.88169	0.8674	50
1221	hydrastinine - MCF7	-0.269	2	-0.371	0.88282	0.8512	50
1222	suprofen - MCF7	0.002	2	0.37	0.88427	0.8271	50
1223	amiloride - MCF7	-0.324	2	-0.37	0.88433	0.9654	50
1224	etofylline - MCF7	-0.307	2	-0.37	0.88433	0.9053	50
1225	droperidol - MCF7	-0.324	2	-0.369	0.88636	0.8872	50
1226	ganciclovir - MCF7	0.018	2	0.368	0.8898	0.8044	50
1227	santonin - PC3	-0.076	2	-0.367	0.89065	0.7778	50
1228	nialamide - MCF7	-0.302	2	-0.366	0.89202	0.8424	50
1229	flupentixol - MCF7	-0.245	2	-0.366	0.89264	0.8718	50
1230	quinethazone - PC3	-0.322	2	-0.365	0.89322	0.9006	50
1231	isoetarine - MCF7	-0.322	2	-0.365	0.89403	0.9518	50
1232	quercetin - MCF7	-0.252	4	-0.256	0.89425	0.879	50
1233	tiapride - PC3	-0.322	2	-0.365	0.89427	0.9282	50
1234	proglumide - MCF7	-0.035	2	0.365	0.89431	0.8537	50
1235	sulfadiazine - PC3	-0.01	2	0.365	0.89469	0.75	50
1236	aminophenazone - MCF7	-0.322	2	-0.364	0.89489	0.9489	50
1237	Prestwick-689 - MCF7	-0.096	2	-0.363	0.8967	0.858	50
1238	benzamil - PC3	-0.278	2	-0.363	0.89763	0.902	50
1239	molsidomine - MCF7	-0.321	2	-0.361	0.89994	0.9343	50
1240	guanadrel - PC3	0.025	2	0.362	0.90008	0.9141	50
1241	etidronic acid - MCF7	0.012	2	0.362	0.90157	0.9006	50
1242	kanamycin - MCF7	-0.289	2	-0.36	0.90157	0.9573	50
1243	homatropine - PC3	-0.015	2	0.361	0.9024	0.7574	50
1244	baclofen - PC3	-0.033	2	0.361	0.90332	0.8618	50
1245	nomegestrol - MCF7	-0.055	2	-0.359	0.90465	0.8844	50
1246	diclofenac - MCF7	-0.375	3	-0.292	0.90676	0.8938	66
1247	drofenine - MCF7	-0.11	2	-0.357	0.90765	0.8615	50
1248	conessine - MCF7	-0.016	2	0.357	0.90994	0.7902	50
1249	hyoscyamine - PC3	-0.074	2	-0.356	0.91047	0.8232	50
1250	5194442 - MCF7	0.003	2	0.356	0.91085	0.9518	50
1251	kinetin - MCF7	-0.094	2	-0.355	0.91169	0.8758	50
1252	sulfadoxine - MCF7	-0.134	2	-0.355	0.91236	0.9679	50
1253	2,6-dimethylpiperidine - PC3	-0.244	2	-0.354	0.91276	0.8875	50
1254	foliosidine - PC3	-0.291	2	-0.354	0.91363	0.9492	50
1255	zaprinast - MCF7	-0.059	2	-0.354	0.91363	0.8563	50
1256	0225151-0000 - PC3	0.018	2	0.355	0.91405	0.9458	50
1257	pindolol - PC3	0.005	2	0.354	0.91499	0.9427	50
1258	lymecycline - MCF7	-0.05	2	0.354	0.91562	0.8958	50
1259	loxapine - MCF7	-0.317	2	-0.351	0.91753	0.7795	50
1260	dienestrol - MCF7	-0.001	2	0.352	0.91841	0.914	50
1261	bisoprolol - MCF7	0.025	2	0.351	0.91916	0.9051	50
1262	napelline - MCF7	-0.298	2	-0.35	0.91948	0.9355	50
1263	troglitazone - MCF7	-0.263	7	-0.192	0.91978	0.9636	57
1264	piracetam - MCF7	-0.257	2	-0.349	0.92028	0.9245	50
1265	amiloride - PC3	-0.293	2	-0.349	0.92057	0.8807	50
1266	metixene - MCF7	-0.012	2	0.349	0.9222	0.9381	50
1267	amoxapine - MCF7	-0.316	2	-0.348	0.92262	0.9391	50
1268	nabumetone - MCF7	-0.258	2	-0.348	0.92286	0.9241	50
1269	clindamycin - PC3	-0.028	2	0.348	0.92371	0.9134	50
1270	piperacetazine - MCF7	-0.28	2	-0.347	0.92465	0.9143	50
1271	piperacillin - PC3	-0.011	2	0.347	0.92527	0.9067	50
1272	indapamide - PC3	0.018	2	0.347	0.92592	0.8205	50
1273	dehydrocholic acid - PC3	0.014	2	0.345	0.92994	0.9568	50
1274	amphotericin B - MCF7	-0.307	2	-0.343	0.93008	0.9662	50
1275	sulfamethoxazole - MCF7	-0.314	2	-0.343	0.93099	0.9011	50
1276	altretamine - MCF7	-0.297	2	-0.342	0.93173	0.9301	50
1277	berberine - MCF7	-0.309	2	-0.342	0.93201	0.9671	50
1278	glafenine - MCF7	-0.005	2	0.342	0.93308	0.9008	50
1279	(+)-isoprenaline - MCF7	-0.002	2	0.342	0.93415	0.9734	50
1280	iocetamic acid - MCF7	-0.031	2	0.342	0.93429	0.9133	50
1281	fluvoxamine - MCF7	0.009	2	0.341	0.93457	0.9477	50
1282	dizocilpine - PC3	-0.313	2	-0.34	0.93505	0.8671	50
1283	amitriptyline - MCF7	-0.316	3	-0.277	0.9373	0.9364	66
1284	tropicamide - PC3	-0.257	2	-0.338	0.93757	0.9467	50
1285	cinnarizine - MCF7	-0.311	2	-0.335	0.94127	0.879	50
1286	oxaprozin - PC3	-0.006	2	0.336	0.94258	0.9497	50
1287	metamizole sodium - MCF7	-0.222	3	-0.273	0.94325	0.9227	66
1288	cyclobenzaprine - MCF7	0.004	2	0.335	0.94379	0.9778	50
1289	methoxsalen - MCF7	-0.311	2	-0.333	0.94455	0.9226	50
1290	AG-013608 - PC3	-0.159	4	-0.234	0.94615	0.9671	50
1291	N-acetyl-L-aspartic acid - MCF7	-0.31	2	-0.331	0.94636	0.9571	50
1292	famotidine - PC3	-0.309	2	-0.329	0.94912	0.9657	50
1293	edrophonium chloride - MCF7	-0.309	2	-0.326	0.9524	0.9432	50
1294	levamisole - MCF7	-0.308	2	-0.326	0.95256	0.9745	50
1295	antazoline - MCF7	-0.027	2	0.326	0.95527	0.975	50
1296	ursolic acid - MCF7	-0.308	2	-0.323	0.95704	0.9256	50
1297	santonin - MCF7	-0.034	2	0.325	0.95723	0.9595	50
1298	midecamycin - PC3	-0.021	2	0.322	0.95994	0.9841	50
1299	levothyroxine sodium - MCF7	-0.027	2	0.322	0.9604	0.9531	50
1300	dinoprostone - PC3	-0.307	2	-0.319	0.96099	0.9699	50
1301	propantheline bromide - MCF7	-0.06	2	0.321	0.96141	0.9542	50
1302	nalidixic acid - MCF7	-0.306	2	-0.319	0.96185	0.9313	50
1303	sulfanilamide - MCF7	-0.039	2	0.32	0.96238	0.9375	50
1304	nicotinic acid - MCF7	-0.041	2	0.316	0.96626	0.9605	50
1305	tolfenamic acid - PC3	-0.294	2	-0.314	0.9672	0.9657	50
1306	etanidazole - MCF7	-0.262	2	-0.313	0.96809	0.9779	50
1307	morantel - MCF7	-0.297	2	-0.313	0.96837	0.9853	50
1308	oxybuprocaine - MCF7	-0.292	2	-0.313	0.96861	0.9702	50
1309	Prestwick-984 - MCF7	-0.28	2	-0.312	0.96912	0.9713	50
1310	buspirone - MCF7	-0.295	2	-0.312	0.96926	0.9771	50
1311	amrinone - MCF7	-0.055	2	0.312	0.97067	0.9419	50
1312	lanatoside C - PC3	-0.302	2	-0.31	0.97077	0.97	50
1313	scopolamine - MCF7	-0.295	2	-0.31	0.97077	0.9497	50
1314	cyproheptadine - MCF7	-0.302	2	-0.31	0.97117	0.9483	50
1315	sulfamethoxazole - PC3	-0.039	2	0.311	0.97173	0.9412	50
1316	nifurtimox - MCF7	-0.032	2	0.309	0.97332	0.9804	50
1317	homosalate - PC3	-0.272	2	-0.307	0.97362	0.9591	50
1318	PHA-00816795 - PC3	-0.066	2	0.308	0.9738	0.9655	50
1319	phenelzine - PC3	-0.282	2	-0.306	0.97443	0.9212	50
1320	spectinomycin - MCF7	-0.269	2	-0.301	0.97885	0.9762	50
1321	H-89 - PC3	-0.065	2	0.3	0.98034	0.9493	50
1322	acebutolol - PC3	-0.066	2	0.297	0.9825	0.9874	50
1323	nitrendipine - MCF7	-0.357	3	-0.238	0.98317	0.956	66
1324	ramipril - MCF7	-0.065	2	0.296	0.98352	0.9868	50
1325	pimethixene - MCF7	-0.279	2	-0.292	0.98592	0.9896	50
1326	riluzole - MCF7	-0.081	2	0.293	0.98606	0.9752	50
1327	picrotoxinin - MCF7	-0.075	2	0.289	0.98813	0.9857	50
1328	phentolamine - PC3	-0.274	2	-0.289	0.98821	0.9869	50
1329	STOCK1N-35215 - PC3	-0.075	2	0.288	0.98887	0.9942	50
1330	triflupromazine - MCF7	-0.294	2	-0.286	0.9896	0.9727	50
1331	betazole - PC3	-0.294	2	-0.284	0.99081	0.96	50
1332	Prestwick-664 - PC3	-0.084	2	0.282	0.99199	1	50
1333	mephenytoin - MCF7	-0.291	2	-0.277	0.99408	1	50
1334	levomepromazine - PC3	-0.291	2	-0.276	0.99465	1	50
1335	dyclonine - MCF7	-0.288	2	-0.266	0.99785	1	50
1336	tolbutamide - PC3	-0.287	2	-0.263	0.99873	0.9879	50
1337	tolmetin - MCF7	-0.283	2	-0.262	0.99889	0.9936	50
1338	novobiocin - PC3	-0.286	2	-0.261	0.99907	1	50
1339	scopolamine N-oxide - MCF7	-0.286	2	-0.26	0.99924	1	50
1340	ciprofloxacin - MCF7	-0.282	2	-0.252	0.99998	1	50
1341	Gly-His-Lys - MCF7	1	1	1	---	---	100
1342	gossypol - HL60	-1	1	-1	---	---	100
1343	bepridil - PC3	-0.941	1	-1	---	---	100
1344	mefenamic acid - HL60	0.97	1	1	---	---	100
1345	menadione - HL60	-0.88	1	-0.999	---	---	100
1346	DL-PPMP - MCF7	0.905	1	0.998	---	---	100
1347	triflupromazine - PC3	0.902	1	0.998	---	---	100
1348	niclosamide - HL60	-0.867	1	-0.998	---	---	100
1349	propoxycaine - PC3	0.902	1	0.998	---	---	100
1350	estrone - HL60	0.896	1	0.997	---	---	100
1351	tonzonium bromide - PC3	-0.858	1	-0.997	---	---	100
1352	fluvoxamine - PC3	-0.854	1	-0.997	---	---	100
1353	etoposide - HL60	-0.851	1	-0.996	---	---	100
1354	cefalexin - HL60	-0.845	1	-0.995	---	---	100
1355	ketotifen - PC3	0.847	1	0.994	---	---	100
1356	decitabine - MCF7	0.833	1	0.993	---	---	100
1357	5186223 - MCF7	0.831	1	0.993	---	---	100
1358	fluspirilene - HL60	-0.836	1	-0.993	---	---	100
1359	5109870 - MCF7	-0.835	1	-0.993	---	---	100
1360	oxytetracycline - PC3	-0.831	1	-0.993	---	---	100
1361	domperidone - HL60	0.826	1	0.992	---	---	100
1362	nafcillin - HL60	0.823	1	0.992	---	---	100
1363	arecoline - PC3	0.822	1	0.992	---	---	100
1364	menadione - PC3	-0.829	1	-0.992	---	---	100
1365	cefoperazone - PC3	0.819	1	0.991	---	---	100
1366	dexamethasone - ssMCF7	0.816	1	0.99	---	---	100
1367	azapropazone - PC3	0.81	1	0.99	---	---	100
1368	ebselen - PC3	-0.819	1	-0.99	---	---	100
1369	doxazosin - PC3	-0.815	1	-0.989	---	---	100
1370	remoxipride - PC3	-0.811	1	-0.988	---	---	100
1371	vitexin - HL60	0.801	1	0.988	---	---	100
1372	aciclovir - HL60	0.798	1	0.987	---	---	100
1373	vigabatrin - MCF7	0.796	1	0.986	---	---	100
1374	androsterone - PC3	0.795	1	0.986	---	---	100
1375	butirosin - HL60	-0.802	1	-0.986	---	---	100
1376	Prestwick-682 - HL60	0.794	1	0.985	---	---	100
1377	cinchonine - HL60	0.791	1	0.985	---	---	100
1378	terconazole - HL60	-0.799	1	-0.985	---	---	100
1379	etacrynic acid - PC3	-0.797	1	-0.984	---	---	100
1380	clorgiline - PC3	-0.797	1	-0.983	---	---	100
1381	clorsulon - PC3	0.786	1	0.983	---	---	100
1382	zalcitabine - HL60	-0.796	1	-0.983	---	---	100
1383	sulmazole - HL60	0.785	1	0.983	---	---	100
1384	bupropion - PC3	-0.794	1	-0.983	---	---	100
1385	disopyramide - PC3	0.784	1	0.982	---	---	100
1386	daunorubicin - PC3	-0.791	1	-0.981	---	---	100
1387	griseofulvin - HL60	0.775	1	0.981	---	---	100
1388	isoflupredone - PC3	0.771	1	0.98	---	---	100
1389	isoflupredone - MCF7	0.77	1	0.98	---	---	100
1390	8-azaguanine - HL60	-0.786	1	-0.98	---	---	100
1391	sanguinarine - HL60	-0.785	1	-0.98	---	---	100
1392	iocetamic acid - HL60	0.768	1	0.979	---	---	100
1393	myricetin - PC3	-0.783	1	-0.979	---	---	100
1394	pepstatin - PC3	0.761	1	0.978	---	---	100
1395	topiramate - MCF7	0.759	1	0.978	---	---	100
1396	chenodeoxycholic acid - HL60	0.759	1	0.978	---	---	100
1397	mepacrine - MCF7	-0.779	1	-0.977	---	---	100
1398	LY-294002 - ssMCF7	-0.778	1	-0.977	---	---	100
1399	streptozocin - HL60	0.757	1	0.977	---	---	100
1400	hydroxyachillin - HL60	0.757	1	0.977	---	---	100
1401	lymecycline - PC3	-0.778	1	-0.977	---	---	100
1402	apigenin - PC3	-0.778	1	-0.977	---	---	100
1403	streptomycin - PC3	0.756	1	0.976	---	---	100
1404	metolazone - HL60	-0.777	1	-0.976	---	---	100
1405	selegiline - PC3	0.752	1	0.975	---	---	100
1406	dl-alpha tocopherol - HL60	0.752	1	0.975	---	---	100
1407	acemetacin - HL60	0.752	1	0.975	---	---	100
1408	amiodarone - PC3	-0.773	1	-0.975	---	---	100
1409	vinburnine - PC3	0.751	1	0.975	---	---	100
1410	podophyllotoxin - PC3	0.749	1	0.974	---	---	100
1411	pergolide - PC3	0.749	1	0.974	---	---	100
1412	pyrvinium - HL60	-0.771	1	-0.974	---	---	100
1413	2-aminobenzenesulfonamide - PC3	0.749	1	0.973	---	---	100
1414	puromycin - PC3	-0.77	1	-0.973	---	---	100
1415	alpha-ergocryptine - HL60	0.747	1	0.973	---	---	100
1416	diperodon - MCF7	-0.77	1	-0.972	---	---	100
1417	zaprinast - HL60	0.744	1	0.971	---	---	100
1418	sulmazole - MCF7	0.744	1	0.971	---	---	100
1419	doxepin - PC3	-0.767	1	-0.971	---	---	100
1420	fipexide - MCF7	-0.767	1	-0.97	---	---	100
1421	viomycin - PC3	0.742	1	0.97	---	---	100
1422	calcium pantothenate - HL60	-0.765	1	-0.97	---	---	100
1423	vancomycin - PC3	0.741	1	0.97	---	---	100
1424	heptaminol - HL60	0.741	1	0.969	---	---	100
1425	triamterene - HL60	-0.763	1	-0.969	---	---	100
1426	8-azaguanine - PC3	-0.763	1	-0.969	---	---	100
1427	adiphenine - HL60	0.738	1	0.968	---	---	100
1428	lymecycline - HL60	-0.758	1	-0.967	---	---	100
1429	methylbenzethonium chloride - HL60	0.736	1	0.967	---	---	100
1430	nadolol - HL60	0.736	1	0.967	---	---	100
1431	carbenoxolone - HL60	0.736	1	0.967	---	---	100
1432	betamethasone - MCF7	-0.755	1	-0.966	---	---	100
1433	diperodon - HL60	0.735	1	0.966	---	---	100
1434	pivmecillinam - HL60	0.734	1	0.966	---	---	100
1435	ketoconazole - HL60	0.733	1	0.965	---	---	100
1436	colecalciferol - HL60	-0.754	1	-0.965	---	---	100
1437	tropine - HL60	0.732	1	0.965	---	---	100
1438	acetylsalicylsalicylic acid - HL60	0.731	1	0.965	---	---	100
1439	Prestwick-692 - PC3	0.73	1	0.964	---	---	100
1440	arecoline - HL60	-0.753	1	-0.964	---	---	100
1441	flucloxacillin - HL60	0.73	1	0.964	---	---	100
1442	naringenin - PC3	0.729	1	0.964	---	---	100
1443	azapropazone - HL60	0.728	1	0.963	---	---	100
1444	isosorbide - PC3	0.728	1	0.963	---	---	100
1445	phentolamine - HL60	-0.751	1	-0.963	---	---	100
1446	foliosidine - HL60	0.726	1	0.963	---	---	100
1447	ritodrine - HL60	0.726	1	0.963	---	---	100
1448	physostigmine - PC3	0.725	1	0.962	---	---	100
1449	cyclopenthiazide - PC3	-0.749	1	-0.962	---	---	100
1450	iopanoic acid - PC3	-0.747	1	-0.961	---	---	100
1451	mephentermine - HL60	-0.746	1	-0.961	---	---	100
1452	thiostrepton - PC3	-0.746	1	-0.961	---	---	100
1453	proguanil - HL60	0.722	1	0.96	---	---	100
1454	laudanosine - PC3	0.721	1	0.96	---	---	100
1455	iohexol - PC3	0.721	1	0.96	---	---	100
1456	pyrithyldione - PC3	0.721	1	0.96	---	---	100
1457	disopyramide - HL60	0.721	1	0.96	---	---	100
1458	phenazone - MCF7	0.721	1	0.96	---	---	100
1459	dequalinium chloride - PC3	-0.744	1	-0.959	---	---	100
1460	chlorpropamide - HL60	0.718	1	0.959	---	---	100
1461	dapsone - HL60	0.718	1	0.958	---	---	100
1462	naringin - PC3	-0.743	1	-0.958	---	---	100
1463	estropipate - PC3	0.718	1	0.958	---	---	100
1464	spiperone - PC3	-0.743	1	-0.958	---	---	100
1465	biperiden - PC3	0.716	1	0.958	---	---	100
1466	halofantrine - HL60	0.715	1	0.957	---	---	100
1467	3-acetamidocoumarin - PC3	0.714	1	0.957	---	---	100
1468	loperamide - HL60	-0.739	1	-0.956	---	---	100
1469	sulfamethizole - PC3	0.714	1	0.956	---	---	100
1470	diphemanil metilsulfate - HL60	0.713	1	0.956	---	---	100
1471	gramine - HL60	0.712	1	0.956	---	---	100
1472	corticosterone - HL60	0.712	1	0.955	---	---	100
1473	phenoxybenzamine - PC3	-0.737	1	-0.955	---	---	100
1474	Prestwick-675 - MCF7	0.71	1	0.955	---	---	100
1475	labetalol - HL60	-0.737	1	-0.955	---	---	100
1476	repaglinide - HL60	-0.736	1	-0.954	---	---	100
1477	etacrynic acid - MCF7	-0.735	1	-0.954	---	---	100
1478	benzethonium chloride - HL60	0.708	1	0.953	---	---	100
1479	skimmianine - PC3	-0.735	1	-0.953	---	---	100
1480	acepromazine - HL60	-0.733	1	-0.952	---	---	100
1481	metrizamide - HL60	0.706	1	0.952	---	---	100
1482	cyclic adenosine monophosphate - HL60	0.705	1	0.952	---	---	100
1483	tenoxicam - HL60	0.705	1	0.952	---	---	100
1484	medrysone - HL60	-0.731	1	-0.951	---	---	100
1485	rifampicin - PC3	0.704	1	0.951	---	---	100
1486	ronidazole - PC3	-0.731	1	-0.951	---	---	100
1487	novobiocin - HL60	0.704	1	0.951	---	---	100
1488	vinblastine - PC3	0.701	1	0.95	---	---	100
1489	clofilium tosylate - PC3	0.701	1	0.95	---	---	100
1490	atracurium besilate - PC3	0.7	1	0.95	---	---	100
1491	fludrocortisone - HL60	0.699	1	0.949	---	---	100
1492	noscapine - HL60	0.696	1	0.949	---	---	100
1493	tyloxapol - PC3	-0.728	1	-0.949	---	---	100
1494	corbadrine - PC3	-0.728	1	-0.949	---	---	100
1495	piracetam - PC3	-0.728	1	-0.949	---	---	100
1496	N-acetyl-L-aspartic acid - PC3	0.694	1	0.948	---	---	100
1497	megestrol - HL60	0.694	1	0.948	---	---	100
1498	methyldopate - PC3	0.693	1	0.948	---	---	100
1499	fluoxetine - HL60	0.692	1	0.948	---	---	100
1500	etiocholanolone - HL60	0.692	1	0.947	---	---	100
1501	levamisole - PC3	-0.726	1	-0.947	---	---	100
1502	nortriptyline - PC3	-0.725	1	-0.947	---	---	100
1503	meclozine - HL60	-0.725	1	-0.947	---	---	100
1504	iopromide - PC3	0.691	1	0.947	---	---	100
1505	oxybutynin - PC3	-0.725	1	-0.947	---	---	100
1506	ozagrel - PC3	-0.724	1	-0.946	---	---	100
1507	halcinonide - HL60	-0.724	1	-0.946	---	---	100
1508	spiramycin - HL60	0.69	1	0.946	---	---	100
1509	resveratrol - HL60	-0.724	1	-0.946	---	---	100
1510	bisacodyl - PC3	-0.722	1	-0.945	---	---	100
1511	vigabatrin - PC3	0.685	1	0.945	---	---	100
1512	pipemidic acid - HL60	-0.72	1	-0.944	---	---	100
1513	piribedil - HL60	-0.719	1	-0.943	---	---	100
1514	mafenide - HL60	0.682	1	0.943	---	---	100
1515	diperodon - PC3	0.681	1	0.943	---	---	100
1516	prilocaine - HL60	0.68	1	0.942	---	---	100
1517	doxorubicin - PC3	-0.719	1	-0.942	---	---	100
1518	tranexamic acid - HL60	0.68	1	0.942	---	---	100
1519	lansoprazole - PC3	-0.718	1	-0.942	---	---	100
1520	nadide - HL60	0.68	1	0.942	---	---	100
1521	mecamylamine - PC3	0.68	1	0.941	---	---	100
1522	atractyloside - HL60	0.679	1	0.941	---	---	100
1523	vidarabine - PC3	-0.717	1	-0.941	---	---	100
1524	piretanide - PC3	0.678	1	0.94	---	---	100
1525	piromidic acid - PC3	0.678	1	0.94	---	---	100
1526	levocabastine - PC3	0.678	1	0.94	---	---	100
1527	promethazine - PC3	-0.716	1	-0.94	---	---	100
1528	levothyroxine sodium - HL60	0.678	1	0.94	---	---	100
1529	hexestrol - PC3	-0.716	1	-0.939	---	---	100
1530	ethotoin - HL60	-0.715	1	-0.939	---	---	100
1531	butamben - PC3	-0.715	1	-0.938	---	---	100
1532	iloprost - SKMEL5	0.675	1	0.938	---	---	100
1533	acetazolamide - PC3	0.674	1	0.937	---	---	100
1534	acemetacin - PC3	0.673	1	0.937	---	---	100
1535	paracetamol - PC3	-0.713	1	-0.937	---	---	100
1536	copper sulfate - ssMCF7	0.673	1	0.936	---	---	100
1537	tetraethylenepentamine - PC3	0.672	1	0.936	---	---	100
1538	kinetin - HL60	-0.712	1	-0.935	---	---	100
1539	propidium iodide - HL60	0.672	1	0.935	---	---	100
1540	fenbufen - HL60	0.671	1	0.935	---	---	100
1541	budesonide - PC3	-0.711	1	-0.934	---	---	100
1542	capsaicin - PC3	-0.71	1	-0.934	---	---	100
1543	tolfenamic acid - HL60	0.671	1	0.934	---	---	100
1544	isocorydine - HL60	0.67	1	0.934	---	---	100
1545	procainamide - HL60	0.669	1	0.933	---	---	100
1546	moxisylyte - HL60	0.669	1	0.933	---	---	100
1547	Prestwick-1084 - PC3	-0.708	1	-0.933	---	---	100
1548	pirenperone - HL60	0.669	1	0.933	---	---	100
1549	oxybuprocaine - PC3	-0.708	1	-0.933	---	---	100
1550	iopanoic acid - HL60	-0.708	1	-0.933	---	---	100
1551	levopropoxyphene - HL60	0.668	1	0.933	---	---	100
1552	procaine - HL60	-0.707	1	-0.932	---	---	100
1553	methacholine chloride - PC3	-0.707	1	-0.932	---	---	100
1554	ramifenazone - HL60	0.667	1	0.932	---	---	100
1555	5149715 - MCF7	0.665	1	0.931	---	---	100
1556	monocrotaline - PC3	-0.706	1	-0.931	---	---	100
1557	sulfamonomethoxine - PC3	0.665	1	0.931	---	---	100
1558	pivampicillin - PC3	-0.706	1	-0.93	---	---	100
1559	cloperastine - HL60	-0.705	1	-0.93	---	---	100
1560	primidone - HL60	0.662	1	0.93	---	---	100
1561	bephenium hydroxynaphthoate - HL60	-0.704	1	-0.929	---	---	100
1562	nefopam - PC3	0.66	1	0.929	---	---	100
1563	Prestwick-972 - PC3	0.66	1	0.929	---	---	100
1564	dexverapamil - MCF7	-0.703	1	-0.928	---	---	100
1565	suprofen - HL60	0.659	1	0.928	---	---	100
1566	zoxazolamine - PC3	-0.703	1	-0.928	---	---	100
1567	celastrol - MCF7	-0.703	1	-0.928	---	---	100
1568	mefexamide - PC3	0.658	1	0.928	---	---	100
1569	racecadotril - PC3	0.656	1	0.927	---	---	100
1570	tiletamine - HL60	0.655	1	0.926	---	---	100
1571	diloxanide - HL60	0.655	1	0.926	---	---	100
1572	phenylpropanolamine - HL60	0.655	1	0.926	---	---	100
1573	(+)-chelidonine - HL60	0.655	1	0.926	---	---	100
1574	AR-A014418 - MCF7	-0.699	1	-0.926	---	---	100
1575	pargyline - PC3	-0.699	1	-0.924	---	---	100
1576	tetrahydroalstonine - PC3	0.652	1	0.924	---	---	100
1577	amoxapine - HL60	-0.699	1	-0.924	---	---	100
1578	ethambutol - HL60	0.651	1	0.924	---	---	100
1579	betaxolol - HL60	0.651	1	0.924	---	---	100
1580	ifenprodil - PC3	-0.698	1	-0.924	---	---	100
1581	cytisine - PC3	0.651	1	0.923	---	---	100
1582	rifabutin - PC3	-0.698	1	-0.923	---	---	100
1583	clioquinol - PC3	-0.697	1	-0.923	---	---	100
1584	pyrvinium - PC3	-0.697	1	-0.923	---	---	100
1585	monorden - SKMEL5	0.65	1	0.922	---	---	100
1586	(+)-chelidonine - PC3	0.65	1	0.922	---	---	100
1587	clofazimine - PC3	0.649	1	0.922	---	---	100
1588	sertaconazole - PC3	-0.696	1	-0.922	---	---	100
1589	fenofibrate - HL60	0.649	1	0.921	---	---	100
1590	bisoprolol - PC3	0.649	1	0.921	---	---	100
1591	bethanechol - PC3	0.648	1	0.921	---	---	100
1592	harman - HL60	0.648	1	0.92	---	---	100
1593	yohimbine - PC3	-0.694	1	-0.92	---	---	100
1594	trihexyphenidyl - MCF7	0.647	1	0.92	---	---	100
1595	ginkgolide A - HL60	-0.693	1	-0.919	---	---	100
1596	cefepime - HL60	0.645	1	0.919	---	---	100
1597	monobenzone - PC3	-0.692	1	-0.919	---	---	100
1598	nystatin - HL60	0.644	1	0.918	---	---	100
1599	merbromin - HL60	0.644	1	0.918	---	---	100
1600	norethisterone - HL60	-0.691	1	-0.918	---	---	100
1601	amphotericin B - PC3	0.643	1	0.918	---	---	100
1602	sulfapyridine - HL60	-0.691	1	-0.918	---	---	100
1603	prazosin - PC3	0.642	1	0.917	---	---	100
1604	ondansetron - HL60	0.642	1	0.917	---	---	100
1605	biperiden - HL60	0.642	1	0.917	---	---	100
1606	12,13-EODE - MCF7	0.642	1	0.917	---	---	100
1607	syrosingopine - HL60	-0.689	1	-0.916	---	---	100
1608	Prestwick-1103 - HL60	0.641	1	0.916	---	---	100
1609	decamethonium bromide - HL60	-0.689	1	-0.916	---	---	100
1610	timolol - PC3	0.641	1	0.915	---	---	100
1611	acepromazine - PC3	-0.688	1	-0.915	---	---	100
1612	sparteine - HL60	0.641	1	0.915	---	---	100
1613	sulfaguanidine - HL60	0.641	1	0.915	---	---	100
1614	tyloxapol - HL60	-0.688	1	-0.915	---	---	100
1615	etanidazole - PC3	-0.688	1	-0.914	---	---	100
1616	lumicolchicine - HL60	0.638	1	0.914	---	---	100
1617	pridinol - PC3	-0.687	1	-0.913	---	---	100
1618	debrisoquine - PC3	0.636	1	0.913	---	---	100
1619	etamsylate - HL60	-0.685	1	-0.912	---	---	100
1620	molsidomine - HL60	0.635	1	0.912	---	---	100
1621	moracizine - PC3	-0.684	1	-0.912	---	---	100
1622	betulinic acid - HL60	0.635	1	0.911	---	---	100
1623	iocetamic acid - PC3	0.634	1	0.911	---	---	100
1624	loracarbef - PC3	-0.683	1	-0.911	---	---	100
1625	ricinine - PC3	0.633	1	0.91	---	---	100
1626	alfadolone - HL60	0.633	1	0.91	---	---	100
1627	Prestwick-857 - PC3	0.632	1	0.91	---	---	100
1628	acacetin - HL60	-0.683	1	-0.91	---	---	100
1629	latamoxef - HL60	-0.683	1	-0.91	---	---	100
1630	securinine - PC3	0.631	1	0.909	---	---	100
1631	chlortalidone - PC3	0.631	1	0.909	---	---	100
1632	CP-645525-01 - PC3	-0.682	1	-0.909	---	---	100
1633	flecainide - HL60	0.628	1	0.908	---	---	100
1634	pimozide - PC3	-0.682	1	-0.908	---	---	100
1635	epiandrosterone - PC3	-0.682	1	-0.908	---	---	100
1636	ceforanide - HL60	0.627	1	0.908	---	---	100
1637	sirolimus - ssMCF7	-0.681	1	-0.908	---	---	100
1638	fluvoxamine - HL60	-0.681	1	-0.907	---	---	100
1639	oxybutynin - HL60	0.624	1	0.907	---	---	100
1640	rilmenidine - PC3	0.624	1	0.906	---	---	100
1641	arcaine - PC3	0.623	1	0.906	---	---	100
1642	acetohexamide - PC3	-0.679	1	-0.905	---	---	100
1643	tamoxifen - PC3	-0.679	1	-0.905	---	---	100
1644	mepenzolate bromide - HL60	0.621	1	0.904	---	---	100
1645	pivampicillin - HL60	-0.677	1	-0.904	---	---	100
1646	BW-B70C - MCF7	0.62	1	0.904	---	---	100
1647	diethylcarbamazine - HL60	-0.677	1	-0.904	---	---	100
1648	metoprolol - PC3	0.62	1	0.903	---	---	100
1649	nimodipine - HL60	0.617	1	0.901	---	---	100
1650	paromomycin - PC3	0.617	1	0.901	---	---	100
1651	procyclidine - PC3	-0.675	1	-0.901	---	---	100
1652	iodixanol - HL60	0.617	1	0.901	---	---	100
1653	cefalotin - HL60	-0.674	1	-0.901	---	---	100
1654	tetracaine - HL60	0.616	1	0.901	---	---	100
1655	Prestwick-1085 - HL60	0.616	1	0.9	---	---	100
1656	caffeic acid - MCF7	-0.674	1	-0.9	---	---	100
1657	dexibuprofen - HL60	0.614	1	0.899	---	---	100
1658	pheneticillin - PC3	0.614	1	0.899	---	---	100
1659	cephaeline - PC3	-0.672	1	-0.899	---	---	100
1660	lansoprazole - HL60	0.614	1	0.899	---	---	100
1661	suxibuzone - PC3	0.613	1	0.899	---	---	100
1662	azlocillin - PC3	-0.672	1	-0.898	---	---	100
1663	chlorphenesin - PC3	-0.671	1	-0.898	---	---	100
1664	guanabenz - HL60	0.613	1	0.898	---	---	100
1665	phthalylsulfathiazole - PC3	-0.671	1	-0.898	---	---	100
1666	ethoxyquin - HL60	-0.671	1	-0.897	---	---	100
1667	raloxifene - ssMCF7	0.611	1	0.897	---	---	100
1668	cefoperazone - MCF7	0.611	1	0.897	---	---	100
1669	etidronic acid - HL60	0.611	1	0.897	---	---	100
1670	chloramphenicol - HL60	-0.671	1	-0.897	---	---	100
1671	cefepime - PC3	0.611	1	0.896	---	---	100
1672	sulfasalazine - PC3	-0.671	1	-0.896	---	---	100
1673	STOCK1N-35696 - PC3	0.61	1	0.895	---	---	100
1674	hydroquinine - HL60	0.609	1	0.895	---	---	100
1675	sulconazole - PC3	-0.668	1	-0.894	---	---	100
1676	benzbromarone - MCF7	0.608	1	0.894	---	---	100
1677	pizotifen - HL60	0.606	1	0.893	---	---	100
1678	letrozole - HL60	-0.668	1	-0.893	---	---	100
1679	sulfamerazine - HL60	0.606	1	0.893	---	---	100
1680	apigenin - HL60	-0.667	1	-0.893	---	---	100
1681	nifurtimox - HL60	0.605	1	0.893	---	---	100
1682	roxithromycin - HL60	-0.667	1	-0.892	---	---	100
1683	tetramisole - PC3	0.605	1	0.892	---	---	100
1684	nifenazone - HL60	0.605	1	0.892	---	---	100
1685	tolazamide - PC3	0.605	1	0.892	---	---	100
1686	Prestwick-692 - HL60	0.605	1	0.892	---	---	100
1687	colistin - HL60	0.604	1	0.891	---	---	100
1688	neomycin - HL60	0.604	1	0.891	---	---	100
1689	sulindac sulfide - MCF7	0.603	1	0.891	---	---	100
1690	meclocycline - HL60	0.602	1	0.89	---	---	100
1691	doxepin - HL60	-0.665	1	-0.89	---	---	100
1692	levobunolol - PC3	0.601	1	0.89	---	---	100
1693	felbinac - PC3	0.6	1	0.889	---	---	100
1694	spironolactone - HL60	-0.664	1	-0.889	---	---	100
1695	tocainide - PC3	0.6	1	0.889	---	---	100
1696	iopamidol - PC3	0.599	1	0.889	---	---	100
1697	sulfaphenazole - PC3	-0.664	1	-0.889	---	---	100
1698	nitrendipine - HL60	-0.664	1	-0.888	---	---	100
1699	vinpocetine - PC3	-0.664	1	-0.888	---	---	100
1700	chloropyrazine - PC3	0.598	1	0.887	---	---	100
1701	serotonin - PC3	0.598	1	0.887	---	---	100
1702	metitepine - PC3	0.598	1	0.887	---	---	100
1703	homochlorcyclizine - HL60	0.597	1	0.887	---	---	100
1704	todralazine - HL60	-0.663	1	-0.887	---	---	100
1705	cyclizine - PC3	0.597	1	0.886	---	---	100
1706	fusidic acid - HL60	0.596	1	0.886	---	---	100
1707	luteolin - PC3	-0.662	1	-0.886	---	---	100
1708	furazolidone - HL60	0.596	1	0.886	---	---	100
1709	etilefrine - PC3	0.595	1	0.885	---	---	100
1710	thioguanosine - PC3	-0.662	1	-0.885	---	---	100
1711	diflorasone - PC3	0.595	1	0.885	---	---	100
1712	meglumine - HL60	-0.661	1	-0.884	---	---	100
1713	PNU-0293363 - MCF7	0.593	1	0.884	---	---	100
1714	Prestwick-857 - HL60	0.593	1	0.884	---	---	100
1715	sanguinarine - MCF7	-0.66	1	-0.884	---	---	100
1716	mesoridazine - HL60	-0.66	1	-0.884	---	---	100
1717	theobromine - HL60	0.593	1	0.883	---	---	100
1718	torasemide - HL60	-0.66	1	-0.883	---	---	100
1719	dehydrocholic acid - HL60	0.592	1	0.883	---	---	100
1720	5186324 - MCF7	0.591	1	0.883	---	---	100
1721	ipratropium bromide - MCF7	-0.659	1	-0.883	---	---	100
1722	ethionamide - MCF7	0.59	1	0.882	---	---	100
1723	1,4-chrysenequinone - PC3	-0.658	1	-0.882	---	---	100
1724	adenosine phosphate - HL60	0.589	1	0.882	---	---	100
1725	naftifine - PC3	0.589	1	0.881	---	---	100
1726	bicuculline - PC3	0.588	1	0.881	---	---	100
1727	betaxolol - PC3	-0.657	1	-0.881	---	---	100
1728	vanoxerine - PC3	0.588	1	0.881	---	---	100
1729	econazole - PC3	-0.656	1	-0.88	---	---	100
1730	theophylline - HL60	0.587	1	0.88	---	---	100
1731	ornidazole - HL60	-0.656	1	-0.88	---	---	100
1732	reserpine - HL60	-0.656	1	-0.88	---	---	100
1733	reserpine - MCF7	-0.655	1	-0.879	---	---	100
1734	ciprofibrate - HL60	0.584	1	0.878	---	---	100
1735	colchicine - PC3	-0.655	1	-0.878	---	---	100
1736	hemicholinium - PC3	0.583	1	0.878	---	---	100
1737	clebopride - PC3	0.583	1	0.878	---	---	100
1738	CAY-10397 - MCF7	-0.654	1	-0.878	---	---	100
1739	lincomycin - HL60	0.583	1	0.878	---	---	100
1740	7-aminocephalosporanic acid - HL60	-0.653	1	-0.877	---	---	100
1741	flucloxacillin - PC3	0.583	1	0.877	---	---	100
1742	benzthiazide - HL60	0.582	1	0.877	---	---	100
1743	cefixime - PC3	-0.653	1	-0.877	---	---	100
1744	prazosin - HL60	-0.653	1	-0.877	---	---	100
1745	salsolidin - PC3	0.581	1	0.877	---	---	100
1746	ebselen - MCF7	-0.653	1	-0.877	---	---	100
1747	ketanserin - HL60	-0.653	1	-0.877	---	---	100
1748	atropine - PC3	-0.653	1	-0.876	---	---	100
1749	prednisone - HL60	0.579	1	0.876	---	---	100
1750	amiprilose - PC3	0.578	1	0.875	---	---	100
1751	tolmetin - PC3	-0.652	1	-0.875	---	---	100
1752	tiaprofenic acid - PC3	-0.652	1	-0.875	---	---	100
1753	clotrimazole - PC3	-0.652	1	-0.875	---	---	100
1754	harmol - HL60	0.576	1	0.875	---	---	100
1755	SR-95531 - PC3	0.576	1	0.875	---	---	100
1756	cephaeline - HL60	-0.652	1	-0.874	---	---	100
1757	piribedil - PC3	-0.652	1	-0.874	---	---	100
1758	parthenolide - HL60	0.576	1	0.874	---	---	100
1759	naringin - HL60	-0.651	1	-0.873	---	---	100
1760	vinburnine - HL60	0.575	1	0.873	---	---	100
1761	netilmicin - HL60	0.575	1	0.873	---	---	100
1762	roxarsone - HL60	-0.651	1	-0.873	---	---	100
1763	PHA-00665752 - MCF7	-0.65	1	-0.872	---	---	100
1764	pizotifen - PC3	-0.65	1	-0.872	---	---	100
1765	tanespimycin - SKMEL5	0.574	1	0.872	---	---	100
1766	cinnarizine - PC3	0.573	1	0.871	---	---	100
1767	trifluridine - HL60	-0.649	1	-0.871	---	---	100
1768	estriol - PC3	-0.649	1	-0.871	---	---	100
1769	nicardipine - HL60	0.572	1	0.871	---	---	100
1770	zuclopenthixol - HL60	-0.648	1	-0.87	---	---	100
1771	harmine - HL60	0.572	1	0.87	---	---	100
1772	fenoterol - PC3	-0.648	1	-0.87	---	---	100
1773	enilconazole - HL60	0.57	1	0.869	---	---	100
1774	metoprolol - HL60	-0.648	1	-0.869	---	---	100
1775	felbinac - HL60	0.57	1	0.869	---	---	100
1776	atropine methonitrate - HL60	0.569	1	0.869	---	---	100
1777	cloxacillin - HL60	0.569	1	0.869	---	---	100
1778	ouabain - HL60	-0.648	1	-0.869	---	---	100
1779	eucatropine - HL60	-0.648	1	-0.869	---	---	100
1780	finasteride - HL60	0.569	1	0.868	---	---	100
1781	alsterpaullone - MCF7	-0.647	1	-0.868	---	---	100
1782	imipramine - HL60	-0.646	1	-0.868	---	---	100
1783	harmalol - PC3	0.568	1	0.867	---	---	100
1784	terfenadine - HL60	-0.646	1	-0.867	---	---	100
1785	asiaticoside - PC3	0.567	1	0.866	---	---	100
1786	6-benzylaminopurine - HL60	-0.646	1	-0.866	---	---	100
1787	lactobionic acid - HL60	0.566	1	0.866	---	---	100
1788	1,5-isoquinolinediol - HL60	0.566	1	0.866	---	---	100
1789	diethylstilbestrol - HL60	0.566	1	0.865	---	---	100
1790	meptazinol - HL60	-0.644	1	-0.865	---	---	100
1791	Prestwick-1083 - HL60	-0.644	1	-0.864	---	---	100
1792	clomipramine - PC3	-0.643	1	-0.864	---	---	100
1793	4-hydroxyphenazone - HL60	0.563	1	0.863	---	---	100
1794	chlorhexidine - HL60	0.563	1	0.863	---	---	100
1795	benzocaine - HL60	0.562	1	0.863	---	---	100
1796	piperacetazine - PC3	-0.643	1	-0.863	---	---	100
1797	ascorbic acid - HL60	0.562	1	0.862	---	---	100
1798	vincamine - HL60	0.562	1	0.862	---	---	100
1799	clotrimazole - HL60	0.562	1	0.862	---	---	100
1800	alexidine - HL60	0.562	1	0.862	---	---	100
1801	flutamide - HL60	-0.642	1	-0.862	---	---	100
1802	meprylcaine - HL60	0.561	1	0.861	---	---	100
1803	BAS-012416453 - PC3	-0.642	1	-0.861	---	---	100
1804	ivermectin - HL60	0.561	1	0.861	---	---	100
1805	nitrofural - HL60	0.559	1	0.86	---	---	100
1806	HC toxin - MCF7	-0.641	1	-0.86	---	---	100
1807	Prestwick-1082 - PC3	0.559	1	0.86	---	---	100
1808	pseudopelletierine - HL60	-0.641	1	-0.86	---	---	100
1809	pilocarpine - HL60	0.559	1	0.86	---	---	100
1810	zomepirac - PC3	-0.641	1	-0.86	---	---	100
1811	proxyphylline - PC3	-0.641	1	-0.859	---	---	100
1812	piracetam - HL60	0.558	1	0.859	---	---	100
1813	scopolamine N-oxide - HL60	-0.64	1	-0.858	---	---	100
1814	vigabatrin - HL60	0.557	1	0.859	---	---	100
1815	novobiocin - ssMCF7	0.557	1	0.858	---	---	100
1816	budesonide - HL60	0.556	1	0.858	---	---	100
1817	6-azathymine - HL60	-0.64	1	-0.857	---	---	100
1818	streptozocin - PC3	0.556	1	0.857	---	---	100
1819	amiprilose - HL60	0.556	1	0.857	---	---	100
1820	cromoglicic acid - PC3	-0.639	1	-0.857	---	---	100
1821	procyclidine - HL60	0.552	1	0.856	---	---	100
1822	procainamide - PC3	-0.639	1	-0.856	---	---	100
1823	cytochalasin B - MCF7	-0.638	1	-0.856	---	---	100
1824	nabumetone - PC3	-0.638	1	-0.856	---	---	100
1825	dilazep - HL60	0.549	1	0.855	---	---	100
1826	proxymetacaine - HL60	-0.638	1	-0.855	---	---	100
1827	thiamazole - HL60	0.547	1	0.854	---	---	100
1828	enalapril - PC3	0.547	1	0.854	---	---	100
1829	tracazolate - HL60	-0.637	1	-0.854	---	---	100
1830	alprenolol - PC3	0.547	1	0.854	---	---	100
1831	doxycycline - PC3	0.546	1	0.853	---	---	100
1832	chlorpropamide - PC3	-0.636	1	-0.853	---	---	100
1833	galantamine - HL60	0.546	1	0.853	---	---	100
1834	Prestwick-1083 - PC3	0.546	1	0.852	---	---	100
1835	perhexiline - HL60	-0.635	1	-0.852	---	---	100
1836	oxedrine - HL60	0.545	1	0.852	---	---	100
1837	STOCK1N-35696 - MCF7	-0.635	1	-0.852	---	---	100
1838	flunixin - HL60	-0.635	1	-0.851	---	---	100
1839	novobiocin - SKMEL5	0.544	1	0.851	---	---	100
1840	pentoxifylline - HL60	0.544	1	0.851	---	---	100
1841	zimeldine - HL60	-0.634	1	-0.851	---	---	100
1842	epiandrosterone - HL60	-0.634	1	-0.85	---	---	100
1843	mefexamide - HL60	0.542	1	0.85	---	---	100
1844	bicuculline - HL60	0.542	1	0.85	---	---	100
1845	isoetarine - PC3	-0.634	1	-0.85	---	---	100
1846	acetohexamide - HL60	0.542	1	0.85	---	---	100
1847	etodolac - HL60	0.541	1	0.849	---	---	100
1848	moroxydine - HL60	0.54	1	0.849	---	---	100
1849	pentolonium - HL60	0.54	1	0.849	---	---	100
1850	nicardipine - PC3	-0.633	1	-0.849	---	---	100
1851	ethosuximide - HL60	-0.633	1	-0.848	---	---	100
1852	doxazosin - HL60	-0.632	1	-0.848	---	---	100
1853	maprotiline - HL60	0.536	1	0.848	---	---	100
1854	mercaptopurine - PC3	-0.631	1	-0.848	---	---	100
1855	levocabastine - HL60	-0.631	1	-0.847	---	---	100
1856	terconazole - PC3	0.536	1	0.847	---	---	100
1857	phenylpropanolamine - PC3	0.535	1	0.847	---	---	100
1858	fursultiamine - HL60	-0.631	1	-0.847	---	---	100
1859	guanethidine - HL60	-0.631	1	-0.846	---	---	100
1860	succinylsulfathiazole - PC3	0.534	1	0.846	---	---	100
1861	yohimbic acid - HL60	0.534	1	0.846	---	---	100
1862	piroxicam - HL60	0.533	1	0.846	---	---	100
1863	articaine - PC3	0.533	1	0.846	---	---	100
1864	adenosine phosphate - PC3	0.533	1	0.845	---	---	100
1865	fluorometholone - HL60	-0.63	1	-0.845	---	---	100
1866	nilutamide - HL60	0.533	1	0.845	---	---	100
1867	phenelzine - HL60	-0.629	1	-0.845	---	---	100
1868	hydrastinine - HL60	0.53	1	0.844	---	---	100
1869	trazodone - HL60	-0.629	1	-0.844	---	---	100
1870	florfenicol - PC3	0.528	1	0.843	---	---	100
1871	thapsigargin - PC3	0.528	1	0.843	---	---	100
1872	memantine - PC3	0.528	1	0.843	---	---	100
1873	ofloxacin - HL60	0.528	1	0.843	---	---	100
1874	alimemazine - PC3	-0.628	1	-0.843	---	---	100
1875	dipivefrine - PC3	-0.628	1	-0.842	---	---	100
1876	pyrimethamine - HL60	-0.628	1	-0.842	---	---	100
1877	trimipramine - HL60	0.525	1	0.842	---	---	100
1878	desoxycortone - HL60	-0.627	1	-0.841	---	---	100
1879	ticlopidine - HL60	0.524	1	0.841	---	---	100
1880	ioversol - HL60	-0.627	1	-0.841	---	---	100
1881	rifampicin - HL60	0.524	1	0.841	---	---	100
1882	tetroquinone - HL60	0.523	1	0.84	---	---	100
1883	mometasone - HL60	0.523	1	0.84	---	---	100
1884	repaglinide - PC3	-0.626	1	-0.84	---	---	100
1885	1,4-chrysenequinone - HL60	-0.626	1	-0.839	---	---	100
1886	brompheniramine - PC3	0.52	1	0.838	---	---	100
1887	digitoxigenin - HL60	-0.625	1	-0.838	---	---	100
1888	meclozine - PC3	-0.625	1	-0.838	---	---	100
1889	(+)-isoprenaline - PC3	-0.624	1	-0.838	---	---	100
1890	ribavirin - HL60	0.52	1	0.838	---	---	100
1891	tiaprofenic acid - HL60	0.519	1	0.837	---	---	100
1892	progesterone - HL60	0.519	1	0.837	---	---	100
1893	acetazolamide - HL60	-0.624	1	-0.837	---	---	100
1894	butein - MCF7	-0.624	1	-0.837	---	---	100
1895	TTNPB - PC3	0.518	1	0.836	---	---	100
1896	exemestane - MCF7	0.518	1	0.836	---	---	100
1897	troleandomycin - MCF7	-0.623	1	-0.836	---	---	100
1898	fluorometholone - PC3	-0.623	1	-0.836	---	---	100
1899	dl-alpha tocopherol - PC3	-0.623	1	-0.836	---	---	100
1900	esculin - PC3	0.518	1	0.836	---	---	100
1901	gliclazide - HL60	-0.623	1	-0.835	---	---	100
1902	cyclic adenosine monophosphate - PC3	0.516	1	0.835	---	---	100
1903	atovaquone - MCF7	-0.623	1	-0.835	---	---	100
1904	droperidol - HL60	0.514	1	0.834	---	---	100
1905	canavanine - MCF7	-0.623	1	-0.834	---	---	100
1906	adrenosterone - PC3	-0.623	1	-0.834	---	---	100
1907	viomycin - HL60	0.514	1	0.834	---	---	100
1908	mevalolactone - HL60	-0.623	1	-0.834	---	---	100
1909	imipenem - PC3	-0.622	1	-0.834	---	---	100
1910	nomegestrol - PC3	0.512	1	0.833	---	---	100
1911	gliclazide - PC3	-0.621	1	-0.833	---	---	100
1912	PF-00875133-00 - PC3	0.512	1	0.833	---	---	100
1913	iproniazid - HL60	0.511	1	0.832	---	---	100
1914	mesalazine - PC3	0.51	1	0.832	---	---	100
1915	dinoprost - HL60	0.51	1	0.832	---	---	100
1916	artemisinin - MCF7	-0.62	1	-0.832	---	---	100
1917	dorzolamide - HL60	0.509	1	0.831	---	---	100
1918	metyrapone - PC3	-0.62	1	-0.831	---	---	100
1919	protriptyline - HL60	-0.62	1	-0.831	---	---	100
1920	benzathine benzylpenicillin - PC3	0.508	1	0.831	---	---	100
1921	econazole - HL60	-0.619	1	-0.829	---	---	100
1922	pergolide - HL60	0.506	1	0.829	---	---	100
1923	mepyramine - PC3	-0.619	1	-0.829	---	---	100
1924	melatonin - HL60	0.505	1	0.829	---	---	100
1925	N-acetyl-L-leucine - PC3	-0.619	1	-0.829	---	---	100
1926	fasudil - MCF7	0.503	1	0.829	---	---	100
1927	Trolox C - PC3	0.503	1	0.828	---	---	100
1928	cotinine - HL60	0.503	1	0.828	---	---	100
1929	3-hydroxy-DL-kynurenine - PC3	0.503	1	0.828	---	---	100
1930	sulfathiazole - HL60	-0.618	1	-0.828	---	---	100
1931	N-acetylmuramic acid - PC3	0.502	1	0.828	---	---	100
1932	minoxidil - HL60	0.501	1	0.828	---	---	100
1933	folic acid - PC3	0.501	1	0.828	---	---	100
1934	isradipine - PC3	-0.618	1	-0.828	---	---	100
1935	probucol - HL60	-0.618	1	-0.827	---	---	100
1936	antazoline - PC3	0.501	1	0.827	---	---	100
1937	propranolol - HL60	0.501	1	0.827	---	---	100
1938	benzbromarone - HL60	0.5	1	0.827	---	---	100
1939	clomifene - PC3	-0.617	1	-0.826	---	---	100
1940	anabasine - HL60	-0.617	1	-0.826	---	---	100
1941	bambuterol - HL60	-0.617	1	-0.826	---	---	100
1942	methazolamide - HL60	-0.616	1	-0.825	---	---	100
1943	hexetidine - PC3	0.498	1	0.825	---	---	100
1944	lorglumide - PC3	-0.616	1	-0.825	---	---	100
1945	4,5-dianilinophthalimide - PC3	-0.616	1	-0.825	---	---	100
1946	nadolol - PC3	0.497	1	0.824	---	---	100
1947	propidium iodide - PC3	0.496	1	0.824	---	---	100
1948	theophylline - PC3	0.495	1	0.824	---	---	100
1949	phthalylsulfathiazole - HL60	-0.615	1	-0.823	---	---	100
1950	hydralazine - HL60	-0.615	1	-0.823	---	---	100
1951	pramocaine - HL60	0.495	1	0.823	---	---	100
1952	gallamine triethiodide - HL60	-0.615	1	-0.823	---	---	100
1953	zaprinast - PC3	0.493	1	0.822	---	---	100
1954	nitrofurantoin - HL60	-0.615	1	-0.822	---	---	100
1955	4,5-dianilinophthalimide - MCF7	-0.615	1	-0.822	---	---	100
1956	aminocaproic acid - HL60	0.492	1	0.822	---	---	100
1957	roxarsone - PC3	-0.615	1	-0.822	---	---	100
1958	isopropamide iodide - HL60	-0.614	1	-0.821	---	---	100
1959	Prestwick-1083 - MCF7	0.491	1	0.821	---	---	100
1960	Prestwick-983 - HL60	0.49	1	0.821	---	---	100
1961	S-propranolol - PC3	-0.614	1	-0.82	---	---	100
1962	rolitetracycline - PC3	0.489	1	0.82	---	---	100
1963	probucol - PC3	0.489	1	0.82	---	---	100
1964	phensuximide - HL60	0.489	1	0.82	---	---	100
1965	famprofazone - HL60	-0.613	1	-0.82	---	---	100
1966	lasalocid - HL60	0.488	1	0.819	---	---	100
1967	ciclosporin - PC3	0.488	1	0.819	---	---	100
1968	oxolamine - PC3	0.488	1	0.819	---	---	100
1969	probenecid - PC3	0.487	1	0.819	---	---	100
1970	pirenperone - PC3	0.487	1	0.819	---	---	100
1971	colecalciferol - PC3	0.486	1	0.819	---	---	100
1972	nizatidine - PC3	-0.612	1	-0.818	---	---	100
1973	bromocriptine - HL60	0.485	1	0.818	---	---	100
1974	oxybenzone - PC3	0.484	1	0.818	---	---	100
1975	ethaverine - HL60	-0.611	1	-0.818	---	---	100
1976	(+/-)-catechin - PC3	0.482	1	0.817	---	---	100
1977	anisomycin - HL60	-0.611	1	-0.817	---	---	100
1978	clonidine - HL60	-0.611	1	-0.817	---	---	100
1979	(-)-isoprenaline - HL60	0.482	1	0.817	---	---	100
1980	amantadine - HL60	0.481	1	0.816	---	---	100
1981	chlorphenamine - HL60	0.48	1	0.816	---	---	100
1982	Prestwick-664 - HL60	-0.609	1	-0.815	---	---	100
1983	phenazone - PC3	0.478	1	0.815	---	---	100
1984	Prestwick-972 - MCF7	-0.608	1	-0.815	---	---	100
1985	tolazamide - MCF7	0.478	1	0.815	---	---	100
1986	oxymetazoline - HL60	0.478	1	0.815	---	---	100
1987	chlorzoxazone - PC3	-0.608	1	-0.815	---	---	100
1988	nisoxetine - HL60	0.478	1	0.815	---	---	100
1989	Prestwick-691 - PC3	0.478	1	0.815	---	---	100
1990	cefalotin - PC3	0.478	1	0.814	---	---	100
1991	practolol - PC3	-0.607	1	-0.814	---	---	100
1992	bufexamac - PC3	-0.607	1	-0.814	---	---	100
1993	flunarizine - HL60	-0.607	1	-0.814	---	---	100
1994	oxamniquine - HL60	-0.607	1	-0.813	---	---	100
1995	sertaconazole - HL60	0.474	1	0.813	---	---	100
1996	monensin - HL60	-0.606	1	-0.812	---	---	100
1997	co-dergocrine mesilate - HL60	0.474	1	0.812	---	---	100
1998	fusaric acid - HL60	-0.606	1	-0.812	---	---	100
1999	(-)-MK-801 - PC3	-0.606	1	-0.812	---	---	100
[truncated: 1,588 more rows]

## Sheet: by atc code
rank	atc code	mean	n	enrichment	p	specificity	percent non-null
1	N05AB	-0.476	60	-0.381	0	0.0777	80
2	D01AC	-0.421	35	-0.359	0.00016	0.0493	74
3	C04AD	0.632	5	0.852	0.00018	0	100
4	B02BA	-0.854	2	-0.992	0.00022	0	100
5	P02CX	-0.732	6	-0.77	0.00026	0.0309	100
6	J04BA	0.45	10	0.623	0.00028	0.0053	70
7	V08AB	0.25	26	0.386	0.00046	0.0203	50
8	N05AG	-0.615	8	-0.664	0.00064	0.0374	87
9	G01AF	-0.34	37	-0.301	0.00181	0.041	72
10	A04AA	0.471	4	0.78	0.00442	0.0168	100
11	L01CA	0.659	3	0.85	0.00631	0.0387	100
12	N05AC	-0.389	24	-0.338	0.00681	0.266	66
13	J01XA	0.395	4	0.755	0.00686	0.006	75
14	N05AA	-0.359	37	-0.269	0.00703	0.0551	64
15	L01CB	-0.795	4	-0.745	0.00837	0.0769	100
16	H02AA	0.253	12	0.451	0.0094	0.0338	66
17	A10BX	-0.634	4	-0.727	0.01134	0.0441	100
18	L01BA	-0.509	8	-0.533	0.01183	0.0753	75
19	D10AD	-0.436	26	-0.304	0.01205	0.1705	76
20	B02AA	0.283	8	0.532	0.01242	0.0069	75
21	D08AH	-0.645	5	-0.645	0.01402	0.0248	100
22	G01AC	-0.645	5	-0.645	0.01402	0.0248	100
23	P01AA	-0.645	5	-0.645	0.01402	0.0248	100
24	N06AA	-0.366	46	-0.228	0.01497	0.1827	67
25	B01AC	-0.3	35	-0.249	0.021	0.129	60
26	L01DB	-0.57	10	-0.448	0.02359	0.3858	90
27	G03DB	0.162	11	0.424	0.02567	0.0546	63
28	V03AC	-0.42	8	-0.49	0.02702	0.0736	87
29	N04BB	0.461	4	0.667	0.02751	0.1006	75
30	N05CE	0.507	4	0.665	0.02839	0.0471	75
31	R05DB	-0.352	23	-0.296	0.02916	0.0199	69
32	V03AF	0.336	5	0.604	0.02988	0.2431	60
33	R06AE	-0.403	19	-0.322	0.03024	0.0654	73
34	S01ED	0.19	16	0.348	0.03086	0.125	50
35	L01XX	-0.381	34	-0.241	0.0318	0.1786	70
36	A07AC	-0.614	5	-0.594	0.03198	0.062	100
37	P01AC	0.36	4	0.649	0.03591	0.0756	75
38	D07AD	-0.478	8	-0.467	0.04052	0.0892	75
39	G04CB	0.241	6	0.531	0.04211	0.1689	50
40	P02DA	-0.546	5	-0.573	0.04246	0.1653	100
41	A06AB	-0.604	4	-0.625	0.04886	0.0807	100
42	A06AG	-0.604	4	-0.625	0.04886	0.0807	100
43	J01DE	0.291	4	0.626	0.04904	0.0323	75
44	J01DB	-0.287	22	-0.28	0.05205	0.1386	72
45	C01EA	0.314	7	0.476	0.05623	0.3155	57
46	B02BX	-0.513	4	-0.599	0.06756	0.1634	100
47	N06AX	-0.385	18	-0.294	0.07293	0.2134	72
48	S01BA	-0.258	45	-0.187	0.07636	0.3242	51
49	N05CH	0.264	4	0.588	0.07671	0.0641	50
50	N07BA	-0.601	4	-0.589	0.07685	0.1235	100
51	L02AB	0.439	4	0.586	0.07778	0.1576	75
52	M03CA	0.196	6	0.486	0.07844	0.141	50
53	J01GA	0.378	4	0.581	0.08295	0.1633	50
54	B03BB	0.345	4	0.578	0.08546	0.108	75
55	N06BX	-0.391	17	-0.293	0.087	0.5053	70
56	G03GB	-0.509	4	-0.576	0.0886	0.1232	75
57	D06BX	0.277	5	0.52	0.08878	0.2814	60
58	R06AC	-0.364	12	-0.342	0.09312	0.1445	66
59	J01FF	0.17	8	0.413	0.09371	0.122	50
60	A07AX	-0.442	4	-0.557	0.10848	0.1631	100
61	A03BA	-0.364	9	-0.382	0.10979	0.3454	66
62	C02DB	-0.486	6	-0.458	0.11362	0.1217	83
63	C03CC	-0.511	3	-0.62	0.11516	0.1138	66
64	C08EA	-0.488	7	-0.426	0.11541	0.2689	71
65	N05AE	0.225	4	0.548	0.11612	0.0917	75
66	P01BX	0.289	3	0.619	0.11692	0.2414	66
67	S01EX	-0.554	3	-0.618	0.11772	0.139	100
68	J02AB	-0.397	9	-0.372	0.12767	0.1212	77
69	C01CX	0.492	3	0.608	0.1318	0.1627	66
70	C02CA	-0.382	14	-0.298	0.13491	0.2865	71
71	L04AX	-0.31	22	-0.239	0.13698	0.3376	54
72	M09AA	0.267	4	0.527	0.14387	0.269	75
73	C02DA	0.186	5	0.476	0.14839	0.1622	60
74	V03AH	0.186	5	0.476	0.14839	0.1622	60
75	L04AA	-0.301	51	-0.156	0.15145	0.7639	58
76	J01XC	0.344	4	0.519	0.15345	0.1242	50
77	N02CA	0.17	10	0.341	0.15367	0.3404	50
78	V04CD	-0.492	4	-0.521	0.15481	0.2434	75
79	N06DX	0.159	4	0.516	0.15851	0.2041	50
80	R05CB	0.341	4	0.508	0.16957	0.3987	50
81	G01AG	-0.391	4	-0.503	0.18124	0.1783	75
82	P02CB	-0.293	4	-0.502	0.1829	0.0777	75
83	P02CF	-0.314	5	-0.454	0.18596	0.3651	60
84	A01AD	-0.331	17	-0.254	0.18763	0.2772	58
85	J05AE	-0.436	4	-0.494	0.19591	0.1534	75
86	J05AX	0.235	5	0.449	0.1968	0.2345	60
87	C02KD	-0.445	4	-0.49	0.20173	0.2527	75
88	P01BD	-0.468	5	-0.443	0.20797	0.3067	80
89	N07AX	0.216	4	0.484	0.20939	0.4843	50
90	P01BC	-0.508	5	-0.442	0.21041	0.4537	80
91	C08DB	-0.334	5	-0.436	0.22147	0.4792	60
92	N05AL	-0.383	14	-0.266	0.23213	0.379	64
93	C02KC	-0.338	4	-0.475	0.23372	0.4757	50
94	R05CA	-0.267	10	-0.31	0.23808	0.5735	60
95	J01XB	0.171	4	0.47	0.23899	0.5495	50
96	D05AD	-0.451	7	-0.362	0.25373	0.525	71
97	D05BA	-0.451	7	-0.362	0.25373	0.525	71
98	A07DA	-0.406	6	-0.38	0.27399	0.4649	66
99	C02AA	-0.35	6	-0.379	0.2775	0.4211	66
100	D01AA	-0.245	12	-0.273	0.27795	0.2849	66
101	N02BE	-0.322	8	-0.329	0.28761	0.371	62
102	A11HA	-0.273	11	-0.281	0.29429	0.4227	54
103	L02BG	0.106	5	0.403	0.30327	0.204	60
104	G04BD	-0.322	8	-0.322	0.30963	0.3936	75
105	A03AD	-0.29	4	-0.441	0.31321	0.3333	50
106	C01AA	-0.333	10	-0.287	0.31875	0.5313	70
107	C03DB	-0.23	10	-0.283	0.33075	0.2842	50
108	N01AX	-0.307	14	-0.241	0.33766	0.6162	64
109	J01XE	-0.371	5	-0.388	0.34208	0.4198	60
110	A07XA	0.221	4	0.427	0.34811	0.359	50
111	A03AA	-0.309	12	-0.255	0.35442	0.3889	58
112	D07AA	-0.29	12	-0.253	0.36418	0.4278	66
113	J01EA	0.073	5	0.38	0.36706	0.3397	60
114	D10BA	-0.369	4	-0.421	0.36903	0.4444	75
115	N07XX	0.068	5	0.379	0.37122	0.2987	60
116	N03AA	0.134	4	0.418	0.37252	0.2656	50
117	D01AE	-0.206	21	-0.192	0.37338	0.4903	57
118	C01CE	-0.229	13	-0.241	0.37627	0.4737	61
119	G03HA	-0.395	4	-0.415	0.3874	0.5989	75
120	H03BA	-0.343	4	-0.413	0.39446	0.6875	50
121	D01BA	-0.267	5	-0.371	0.39644	0.3636	80
122	J01MA	-0.254	25	-0.172	0.40413	0.5749	56
123	P01AX	-0.371	9	-0.279	0.40979	0.7516	55
124	C05AA	-0.229	28	-0.162	0.41322	0.4969	50
125	S01LA	-0.297	3	-0.462	0.42839	0.7384	66
126	D03AX	-0.258	8	-0.288	0.44085	0.5663	50
127	P01BE	-0.363	3	-0.455	0.44506	0.4699	66
128	C01EB	-0.28	12	-0.236	0.44626	0.7297	58
129	R06AD	-0.342	12	-0.234	0.45444	0.4242	66
130	N07CA	-0.311	12	-0.231	0.47416	0.7023	58
131	J02AX	-0.307	4	-0.382	0.49297	0.5491	50
132	S01HA	-0.179	26	-0.157	0.49769	0.705	50
133	N02BA	-0.237	18	-0.186	0.50138	0.6667	50
134	J01DH	-0.276	4	-0.375	0.51527	0.6402	50
135	N02AF	-0.229	5	-0.337	0.51851	0.5652	80
136	P01CX	0.125	4	0.373	0.5199	0.548	50
137	N03AF	-0.208	8	-0.269	0.52626	0.6364	50
138	S01EA	-0.242	8	-0.268	0.53159	0.4138	50
139	N03AB	-0.36	10	-0.24	0.5332	0.6244	60
140	C10AA	-0.314	12	-0.218	0.5437	0.5482	66
141	L01BB	-0.397	3	-0.412	0.56065	0.6957	66
142	C08CA	-0.221	31	-0.136	0.56828	0.6567	51
143	R01BA	-0.018	4	0.347	0.61012	0.5068	50
144	A10BB	-0.166	41	-0.114	0.6164	0.7432	51
145	A05AX	-0.211	4	-0.343	0.62919	0.6084	50
146	M05BA	0.035	4	0.34	0.63214	0.5548	50
147	M03BX	-0.145	22	-0.152	0.63342	0.6821	50
148	R06AX	-0.199	36	-0.12	0.63382	0.7353	52
149	N07AB	-0.157	8	-0.246	0.63501	0.6596	62
150	C02AC	-0.236	16	-0.176	0.64003	0.6221	50
151	B03BA	-0.171	4	-0.338	0.64382	0.6811	75
152	J01EB	-0.193	28	-0.134	0.64769	0.7924	50
153	C05AD	-0.155	32	-0.126	0.64867	0.765	56
154	P02BX	-0.264	4	-0.328	0.67881	0.7104	50
155	M01AA	0.063	4	0.326	0.6808	0.8705	50
156	P02CE	-0.336	4	-0.326	0.68358	0.8247	50
157	J05AF	-0.151	8	-0.236	0.68379	0.6974	50
158	G03BA	-0.316	5	-0.293	0.68994	0.7161	60
159	C07AG	-0.392	4	-0.324	0.69126	0.6619	75
160	G03XA	-0.286	4	-0.324	0.69323	0.6463	50
161	G04BX	-0.355	4	-0.323	0.69639	0.8038	50
162	C04AA	-0.173	5	-0.289	0.70776	0.6233	60
163	A03FA	-0.175	24	-0.136	0.71593	0.6415	50
164	A04AD	-0.212	4	-0.31	0.73644	0.7279	50
165	N05CM	-0.212	4	-0.31	0.73644	0.7279	50
166	A07EB	-0.32	2	-0.427	0.74963	0.7293	50
167	R03BC	-0.32	2	-0.427	0.74963	0.7293	50
168	S01AD	-0.182	23	-0.135	0.75037	0.6741	56
169	N05AF	-0.167	12	-0.182	0.75773	0.8214	58
170	C08DA	-0.229	6	-0.252	0.76278	0.775	50
171	C03BD	0.083	4	0.297	0.77581	0.7035	50
172	C04AE	-0.208	9	-0.203	0.78357	0.7574	55
173	N04BD	-0.216	4	-0.291	0.79685	0.7771	75
174	A14AA	-0.022	4	0.288	0.80208	0.8556	50
175	G03AC	-0.197	19	-0.14	0.80482	0.8681	52
176	R01AC	-0.15	12	-0.172	0.81289	0.8557	50
177	S01AB	-0.166	13	-0.163	0.82371	0.8744	53
178	N01BX	-0.234	8	-0.205	0.82764	0.8187	50
179	D07XA	-0.172	8	-0.204	0.82947	0.8121	50
180	P02BB	-0.198	5	-0.254	0.83196	0.8469	60
181	D10AA	-0.21	16	-0.146	0.83598	0.85	50
182	G02AB	-0.319	4	-0.271	0.85669	0.9167	50
183	M03AA	-0.28	2	-0.377	0.87117	0.9096	50
184	V04CG	-0.329	5	-0.239	0.87962	0.8462	60
185	C08EX	-0.227	7	-0.204	0.88354	0.896	57
186	L01AX	-0.18	4	-0.259	0.88753	0.9482	50
187	M01AE	-0.133	54	-0.076	0.8892	0.9583	53
188	A11CC	-0.182	8	-0.179	0.92129	0.9419	62
189	N03AD	-0.182	8	-0.178	0.92569	0.9397	50
190	G03DA	-0.207	4	-0.239	0.93581	0.9329	50
191	G03XB	-0.287	4	-0.233	0.94808	0.9241	50
192	M03BB	-0.234	8	-0.16	0.96686	0.9622	62
193	N02CX	-0.228	8	-0.157	0.9714	0.9633	62
194	C03DA	-0.223	5	-0.193	0.97365	0.9869	60
195	C05AX	-0.191	4	-0.21	0.98106	0.9837	50
196	C05CX	-0.191	4	-0.21	0.98106	0.9837	50
197	L02BA	-0.174	47	-0.058	0.9946	1	51
198	G02CA	-0.198	7	-0.132	0.99802	0.9858	57
199	L02AA	0.171	6	0.652	---	---	33
200	L01CD	0.177	6	0.648	---	---	33
201	N03AC	0	4	0.595	---	---	0
202	G01AD	0.141	4	0.58	---	---	25
203	G03CB	0.114	9	0.541	---	---	33
204	J01DF	0.118	5	0.538	---	---	20
205	V04CH	0	4	0.476	---	---	0
206	H03BB	0.262	9	0.467	---	---	44
207	D08AC	0.045	5	0.463	---	---	20
208	R02AA	0.045	5	0.463	---	---	20
209	J04AD	0.076	3	0.456	---	---	33
210	R01AX	-0.22	3	-0.452	---	---	33
211	R03BB	-0.22	3	-0.452	---	---	33
212	J01CF	0.202	12	0.448	---	---	41
213	S01XA	0.022	8	0.443	---	---	12
214	N07BB	0.069	10	0.438	---	---	30
215	P03AA	-0.078	5	0.437	---	---	0
216	N04BA	0.044	5	0.427	---	---	20
217	D08AF	0.036	4	0.418	---	---	25
218	P01BB	0.1	3	0.414	---	---	33
219	P02CC	0.056	9	0.413	---	---	22
220	J04AC	0.126	5	0.411	---	---	40
221	J01CE	0.135	12	0.411	---	---	33
222	D06BB	0.187	15	0.401	---	---	40
223	S02DA	0.14	5	0.401	---	---	40
224	M04AC	-0.107	6	0.391	---	---	16
225	C03CA	0.033	16	0.378	---	---	25
226	R03BX	-0.212	5	-0.376	---	---	40
227	R03DX	-0.212	5	-0.376	---	---	40
228	C02DC	-0.025	5	0.365	---	---	40
229	N05BB	-0.055	5	0.359	---	---	20
230	C07AA	0.17	36	0.354	---	---	41
231	R05DA	0.079	8	0.353	---	---	25
232	R07AB	0.04	12	0.341	---	---	25
233	C02BB	-0.079	3	0.34	---	---	33
234	L01XB	-0.318	3	0.336	---	---	0
235	N07AA	0.034	4	0.333	---	---	25
236	P01CC	0.086	8	0.328	---	---	37
237	A05BA	-0.171	6	-0.327	---	---	33
238	L01XE	-0.031	3	0.326	---	---	33
239	A16AX	0.15	7	0.324	---	---	42
240	A01AC	0.055	16	0.317	---	---	31
241	A03AX	0.034	8	0.317	---	---	25
242	G02AD	0.085	8	0.316	---	---	37
243	C01AB	-0.198	3	0.316	---	---	0
244	G03CA	0.149	45	0.312	---	---	46
245	N05BE	-0.147	4	-0.312	---	---	25
246	A05AA	0.06	7	0.311	---	---	28
247	R06AA	0.074	23	0.31	---	---	34
248	H03AA	-0.001	8	0.309	---	---	25
249	N05AX	-0.052	3	-0.305	---	---	33
250	A08AB	-0.117	5	0.305	---	---	20
251	M03BA	-0.146	7	0.304	---	---	0
252	M02AX	0.052	5	0.303	---	---	20
253	J01XX	-0.134	4	-0.301	---	---	25
254	P02BA	-0.041	8	0.299	---	---	12
255	R02AD	0.123	13	0.298	---	---	46
256	L04AD	-0.031	9	0.286	---	---	22
257	N04AA	0.068	20	0.284	---	---	40
258	A02BX	-0.117	14	0.282	---	---	14
259	J01BA	0.146	9	0.279	---	---	44
260	M01AC	0.1	8	0.274	---	---	37
261	C02DG	-0.139	4	0.274	---	---	0
262	J01DC	0.057	35	0.271	---	---	31
263	A02BA	0.03	19	0.271	---	---	26
264	S01EB	-0.016	16	0.271	---	---	25
265	C01BB	0.047	15	0.268	---	---	33
266	N06DA	0.053	8	0.266	---	---	37
267	R03AC	-0.27	21	-0.266	---	---	47
268	C04AC	-0.02	4	0.265	---	---	25
269	C10AD	-0.02	4	0.265	---	---	25
270	N02BG	0.012	9	0.262	---	---	44
271	G02CC	0.108	13	0.259	---	---	30
272	V08AC	0.007	12	0.259	---	---	41
273	C04AB	-0.005	12	0.258	---	---	25
274	D07XC	-0.2	7	0.256	---	---	14
275	G04CA	-0.107	9	0.255	---	---	22
276	R03AB	-0.145	4	0.252	---	---	25
277	R03CB	-0.145	4	0.252	---	---	25
278	N01BA	-0.009	12	0.249	---	---	41
279	J04AK	-0.262	9	0.248	---	---	11
280	S02BA	-0.084	19	0.246	---	---	21
281	G03DC	-0.009	19	0.245	---	---	36
282	L01AD	0.034	15	0.243	---	---	33
283	G03CC	-0.02	17	0.24	---	---	29
284	V04CA	-0.233	7	0.237	---	---	14
285	R06AB	0.063	13	0.235	---	---	38
286	S01GX	-0.008	12	0.234	---	---	33
287	S03BA	-0.083	16	0.23	---	---	18
288	A02BC	0.005	8	0.228	---	---	37
289	A11DA	-0.15	8	0.226	---	---	12
290	C10AB	-0.13	18	0.224	---	---	22
291	M01AH	-0.096	14	0.223	---	---	21
292	D10AF	-0.008	18	0.223	---	---	27
293	C01BA	-0.009	18	0.219	---	---	38
294	A10BA	-0.098	17	0.217	---	---	17
295	P01BA	-0.148	12	0.215	---	---	8
296	L01AA	-0.205	7	-0.214	---	---	42
297	R03BA	-0.076	29	0.209	---	---	24
298	V03AB	-0.032	18	0.203	---	---	27
299	R02AB	-0.139	8	0.203	---	---	25
300	C10AX	-0.029	10	0.202	---	---	40
301	G03XC	-0.059	7	0.201	---	---	28
302	C01DX	0.009	21	0.2	---	---	38
303	C02CC	-0.109	7	0.199	---	---	28
304	S03AA	-0.001	28	0.198	---	---	28
305	P02CA	-0.133	16	0.195	---	---	12
306	C01BG	-0.117	4	0.194	---	---	25
307	D06AX	0.044	24	0.191	---	---	37
308	R01AD	-0.066	42	0.191	---	---	23
309	N03AX	-0.138	5	0.191	---	---	20
310	C03AA	-0.033	24	0.191	---	---	20
311	A07AA	-0.034	32	0.189	---	---	31
312	J05AB	0.022	23	0.189	---	---	39
313	C07AB	-0.037	21	0.185	---	---	38
314	S01BC	-0.127	30	0.184	---	---	16
315	C09AA	-0.049	16	0.183	---	---	25
316	R03CC	-0.205	25	-0.182	---	---	44
317	A07EC	-0.004	10	0.182	---	---	30
318	J01XD	-0.043	16	0.181	---	---	37
319	P01AB	-0.043	16	0.181	---	---	37
320	R01AA	-0.142	16	0.181	---	---	25
321	R01AB	-0.142	16	0.181	---	---	25
322	R03DA	-0.037	21	0.181	---	---	28
323	D09AA	-0.082	18	0.179	---	---	22
324	A07AB	-0.122	14	-0.178	---	---	42
325	L02BB	-0.157	9	-0.178	---	---	44
326	G01AX	-0.065	8	0.177	---	---	25
327	C01BD	-0.156	9	-0.177	---	---	44
328	G02CB	-0.072	14	0.176	---	---	35
329	B01AA	-0.038	15	0.175	---	---	26
330	D11AX	-0.106	29	0.175	---	---	17
331	M01AG	0.017	20	0.168	---	---	30
332	D06BA	-0.048	23	0.165	---	---	34
333	C03BA	-0.048	28	0.162	---	---	28
334	S01GA	-0.137	20	0.161	---	---	25
335	J01MB	-0.202	25	-0.16	---	---	44
336	J01CA	0.003	41	0.159	---	---	31
337	A03AB	-0.124	13	0.158	---	---	23
338	A07EA	-0.126	23	0.158	---	---	26
339	J01EC	-0.146	10	0.158	---	---	20
340	J01ED	-0.188	23	-0.157	---	---	47
341	N06AF	-0.067	25	0.155	---	---	24
342	D06AA	-0.138	19	0.155	---	---	15
343	S01CB	-0.147	23	-0.154	---	---	39
344	S01AX	-0.142	30	0.152	---	---	16
345	J04AB	-0.054	11	0.151	---	---	27
346	G04BE	-0.075	28	0.148	---	---	25
347	N06AB	-0.147	21	0.147	---	---	23
348	C01BC	-0.062	10	0.146	---	---	30
349	D07XB	-0.08	23	0.141	---	---	21
350	S01FA	-0.22	23	-0.137	---	---	47
351	M01AX	-0.105	19	0.136	---	---	15
352	J01DD	-0.115	22	0.135	---	---	27
353	M01AB	-0.061	49	0.134	---	---	26
354	B05CA	-0.109	18	0.134	---	---	22
355	C01CA	-0.074	35	0.133	---	---	25
356	N02BB	-0.14	19	0.133	---	---	21
357	C04AX	-0.048	37	0.132	---	---	32
358	N03AG	-0.029	60	0.128	---	---	30
359	S01AA	-0.074	68	0.126	---	---	23
360	M04AB	-0.125	11	-0.124	---	---	45
361	A01AB	-0.093	53	0.122	---	---	26
362	N05AH	-0.1	21	0.121	---	---	19
363	D04AB	-0.095	30	0.12	---	---	26
364	M02AA	-0.063	83	0.12	---	---	25
365	J01FA	-0.122	37	0.119	---	---	18
366	N04BC	-0.122	18	-0.118	---	---	44
367	D07AB	-0.124	27	0.118	---	---	18
368	N05AD	-0.105	43	0.114	---	---	27
369	S01EC	-0.046	20	0.114	---	---	30
370	G01AA	-0.193	19	-0.11	---	---	47
371	A10BG	-0.061	41	0.105	---	---	26
372	N01BB	-0.089	23	0.101	---	---	26
373	J01AA	-0.127	41	0.099	---	---	24
374	D07AC	-0.16	35	0.095	---	---	20
375	S02AA	-0.147	42	0.091	---	---	21
376	J01GB	-0.093	33	0.087	---	---	27
377	H02AB	-0.13	40	0.085	---	---	22
378	D04AA	-0.125	20	0.074	---	---	20
